# Supplementary material
Source: Research Square preprint supplement (doi:10.21203/rs.3.rs-9858585/v1)
Supplement: Supplementary file 1 [file ff4f60f46c973d3135107595.xlsx]

## Sheet: Weather Data
name	datetime	tempmax	tempmin	temp	feelslikemax	feelslikemin	feelslike	dew	humidity	precip	precipprob	precipcover	preciptype	snow	snowdepth	windgust	windspeed	winddir	sealevelpressure	cloudcover	visibility	solarradiation	solarenergy	uvindex	severerisk	sunrise	sunset	moonphase	conditions	description	icon	stations
Nanchang	2025-06-30	95.3	77.4	86.4	106.5	77.4	94.4	75.8	72.5	0.004	0	0	rain	0	0	22.6	8.3	175.9	1005.5	36.9	13.7	278.9	24	8		2025-06-30T05:21:53	2025-06-30T19:18:40	0.15	Partially cloudy	Partly cloudy throughout the day.	partly-cloudy-day	CHI0000ZSCN,58606099999
Nanchang	2025-07-01	96	80	88.1	109.1	80	98.8	76.3	69.2	0	0	0		0	0	27.7	10.1	193.4	1008	39	18.6	295	25.6	9		2025-07-01T05:22:15	2025-07-01T19:18:40	0.19	Partially cloudy	Partly cloudy throughout the day.	partly-cloudy-day	CHI0000ZSCN,58606099999
Nanchang	2025-07-02	96.9	82.8	89.8	113	92.4	103.9	77.9	69	0	0	0		0	0	19.2	7.4	213.6	1008.6	29.2	18.1	304.8	26.4	9		2025-07-02T05:22:38	2025-07-02T19:18:40	0.22	Partially cloudy	Partly cloudy throughout the day.	partly-cloudy-day	CHI0000ZSCN,58606099999
Nanchang	2025-07-03	98.9	82.7	91.3	115.3	92.9	106.8	78.6	67.7	0	0	0		0	0	15.7	6.7	183.9	1006.6	16.1	17.1	296.8	25.6	9		2025-07-03T05:23:02	2025-07-03T19:18:38	0.25	Clear	Clear conditions throughout the day.	clear-day	CHI0000ZSCN,58606099999
Nanchang	2025-07-04	98.7	83.2	92.1	114.8	95.4	107.9	78.4	65.8	0	0	0		0	0	13.2	6	151	1004.3	15.6	17.4	310.1	26.6	10		2025-07-04T05:23:26	2025-07-04T19:18:35	0.28	Clear	Clear conditions throughout the day.	clear-day	CHI0000ZSCN,58606099999
Nanchang	2025-07-05	99.2	82.1	91.8	113.1	92.5	104.9	76.7	63.3	0	0	0		0	0	15.2	6.9	131.3	1003.2	26.8	17.2	313.9	27	9		2025-07-05T05:23:51	2025-07-05T19:18:30	0.32	Partially cloudy	Partly cloudy throughout the day.	partly-cloudy-day	CHI0000ZSCN,58606099999
Nanchang	2025-07-06	98.7	82.5	92.1	118.3	93.5	108.6	78.8	66.3	0.012	0	4.17	rain	0	0	16.1	7.4	50.4	1002.2	8.6	16.6	298	25.8	9		2025-07-06T05:24:17	2025-07-06T19:18:24	0.35	Clear	Clear conditions throughout the day.	clear-day	CHI0000ZSCN,58606099999
Nanchang	2025-07-07	98.3	83.9	90.8	119.1	97.8	107.2	79	69.3	0.024	100	4.17	rain	0	0	24.6	4.3	325.2	1000.6	20.3	14.9	290.2	25	9		2025-07-07T05:24:43	2025-07-07T19:18:16	0.38	Rain, Partially cloudy	Partly cloudy throughout the day with afternoon rain.	rain	CHI0000ZSCN,58606099999
Nanchang	2025-07-08	99.9	82.1	90.1	117.3	92.7	104.7	78.3	69.8	0	0	0		0	0	21.3	5.8	16.2	1000.4	14.6	13.2	289.7	25	9		2025-07-08T05:25:10	2025-07-08T19:18:08	0.41	Clear	Clear conditions throughout the day.	clear-day	CHI0000ZSCN,58606099999
Nanchang	2025-07-09	92.7	83.4	87.9	108.8	92.5	100.1	77.1	70.8	0.102	100	4.17	rain	0	0	33.3	13.2	25.9	999.3	29.4	18.3	244.9	21	8		2025-07-09T05:25:38	2025-07-09T19:17:57	0.45	Rain, Partially cloudy	Partly cloudy throughout the day with afternoon rain.	rain	CHI0000ZSCN,58606099999
Nanchang	2025-07-10	94.2	83.6	88.6	103.4	90.1	97.6	74.2	63	0.016	0	0	rain	0	0	29.8	12.1	48.9	1000.5	7.1	18.3	269	23	9		2025-07-10T05:26:06	2025-07-10T19:17:46	0.48	Clear	Clear conditions throughout the day.	clear-day	CHI0000ZSCN,58606099999
Nanchang	2025-07-11	93.5	83	87.3	104.8	90	96.7	75.1	67.9	0.016	0	0	rain	0	0	25.7	11.6	43.7	1002.5	10.4	14.3	257.7	22.2	8		2025-07-11T05:26:35	2025-07-11T19:17:33	0.5	Clear	Clear conditions throughout the day.	clear-day	CHI0000ZSCN,58606099999
Nanchang	2025-07-12	89	80.5	84	103	87.2	93.6	77.1	80.3	0.004	0	0	rain	0	0	20.4	7.6	40.4	1004.8	47.3	16.2	160.3	13.8	5		2025-07-12T05:27:04	2025-07-12T19:17:18	0.55	Partially cloudy	Partly cloudy throughout the day.	partly-cloudy-day	CHI0000ZSCN,58606099999
Nanchang	2025-07-13	92.2	80	84.3	110.6	80	95.2	78.6	83.4	0.213	100	4.17	rain	0	0	16.3	3.8	351	1004.8	60.1	13	212.5	18.4	9		2025-07-13T05:27:34	2025-07-13T19:17:03	0.58	Rain, Partially cloudy	Partly cloudy throughout the day with afternoon rain.	rain	CHI0000ZSCN,58606099999
Nanchang	2025-07-14	96.2	79.8	87.4	112	79.8	99.5	78.4	76.1	0.004	0	0	rain	0	0	12.8	6	227.3	1002.8	41.6	10.2	267.6	23.1	9		2025-07-14T05:28:04	2025-07-14T19:16:45	0.62	Partially cloudy	Partly cloudy throughout the day.	partly-cloudy-day	CHI0000ZSCN,58606099999
Nanchang	2025-07-15	97.1	82.7	90.4	116.9	93.4	106.7	79.4	71.3	0	0	0		0	0	19.2	8.5	223.8	999.8	41.6	10.5	276.9	23.8	8		2025-07-15T05:28:35	2025-07-15T19:16:27	0.65	Partially cloudy	Partly cloudy throughout the day.	partly-cloudy-day	CHI0000ZSCN,58606099999
Nanchang	2025-07-16	99.1	85.6	92	119.1	99.4	109.2	79.3	67.4	0	0	0		0	0	25.5	11	220.7	999.7	65.1	14.1	290.9	25	9		2025-07-16T05:29:06	2025-07-16T19:16:07	0.69	Partially cloudy	Partly cloudy throughout the day.	partly-cloudy-day	CHI0000ZSCN,58606099999
Nanchang	2025-07-17	98.9	85.2	91.2	119.6	98.5	110.1	80.5	71.6	0.035	100	4.17	rain	0	0	21.9	5.4	214.5	1001.2	60.4	10.3	245.7	21.3	8		2025-07-17T05:29:38	2025-07-17T19:15:45	0.73	Rain, Partially cloudy	Partly cloudy throughout the day with late afternoon rain.	rain	CHI0000ZSCN,58606099999
Nanchang	2025-07-18	97.1	84.3	90.8	124.8	96.9	108.6	79.7	71.3	0.103	100	20.83	rain	0	0	20.6	8.9	23.5	1000.7	23.2	12.9	248.4	21.5	7		2025-07-18T05:30:09	2025-07-18T19:15:23	0.75	Rain, Partially cloudy	Partly cloudy throughout the day with rain clearing later.	rain	CHI0000ZSCN,58606099999
Nanchang	2025-07-19	96.3	83.6	89.9	111.4	91.8	102.1	76.4	65.2	0.004	0	0	rain	0	0	23.5	11	45.3	999.8	10.4	14.9	273.5	23.6	8		2025-07-19T05:30:41	2025-07-19T19:14:59	0.8	Clear	Clear conditions throughout the day.	clear-day	CHI0000ZSCN,58606099999
Nanchang	2025-07-20	95.6	85.4	89.9	109.1	94.8	102.1	76.4	65.1	0.111	100	8.33	rain	0	0	26.4	10.3	67.5	1000.2	44.3	18.6	225.6	19.5	7		2025-07-20T05:31:14	2025-07-20T19:14:33	0.83	Rain, Partially cloudy	Partly cloudy throughout the day with late afternoon rain.	rain	CHI0000ZSCN,58606099999
Nanchang	2025-07-21	95.8	80.7	87.6	110.7	87	99	77	72.2	0.716	100	8.33	rain	0	0	33.8	10.1	78.9	1001.6	37.1	13	197	17.1	7		2025-07-21T05:31:46	2025-07-21T19:14:06	0.87	Rain, Partially cloudy	Becoming cloudy in the afternoon with rain.	rain	CHI0000ZSCN,58606099999
Nanchang	2025-07-22	87.9	79.1	83.1	98.2	79.1	91.6	76.9	82.1	0.799	100	8.33	rain	0	0	33.8	6.7	99.6	1004.8	65.4	15	91	7.7	3		2025-07-22T05:32:19	2025-07-22T19:13:38	0.91	Rain, Partially cloudy	Partly cloudy throughout the day with late afternoon rain.	rain	CHI0000ZSCN,58606099999
Nanchang	2025-07-23	94.2	80	86.5	111.6	80	97.7	77.7	76.1	0.004	0	0	rain	0	0	17.9	6.3	75.6	1005.4	47.1	18.5	228.4	19.9	7		2025-07-23T05:32:52	2025-07-23T19:13:08	0.94	Partially cloudy	Partly cloudy throughout the day.	partly-cloudy-day	CHI0000ZSCN,58606099999
Nanchang	2025-07-24	96	82.1	89.4	110.5	91.7	101.3	76.7	67.5	0.008	0	0	rain	0	0	17.7	7.2	57.2	1003.5	10.8	18.6	288	25	9		2025-07-24T05:33:25	2025-07-24T19:12:37	0.98	Clear	Clear conditions throughout the day.	clear-day	CHI0000ZSCN,58606099999
Nanchang	2025-07-25	95.3	82.1	89.4	106.7	90.7	100.6	75.9	65.5	0	0	0		0	0	21.3	9.8	42.7	1001.4	20.4	18.5	289.8	25.1	9		2025-07-25T05:33:59	2025-07-25T19:12:05	0	Partially cloudy	Clearing in the afternoon.	partly-cloudy-day	CHI0000ZSCN,58606099999
Nanchang	2025-07-26	91.3	81.9	86.5	108.4	91	99	78	76.2	0.146	100	4.17	rain	0	0	23.5	9.6	15.7	1000	52.8	16.4	148.9	12.9	6		2025-07-26T05:34:32	2025-07-26T19:11:32	0.04	Rain, Partially cloudy	Partly cloudy throughout the day with afternoon rain.	rain	CHI0000ZSCN,58606099999
Nanchang	2025-07-27	93.3	81.9	86.1	113	91.9	100.6	79.7	81.6	0.071	100	4.17	rain	0	0	21	7.4	13.9	999.5	60.7	15.4	128.3	11	4		2025-07-27T05:35:06	2025-07-27T19:10:57	0.08	Rain, Partially cloudy	Partly cloudy throughout the day with late afternoon rain.	rain	CHI0000ZSCN,58606099999
Nanchang	2025-07-28	93.1	81.9	87.1	111.3	91.8	100.6	78.6	76.5	0.004	0	0	rain	0	0	21	8.7	13.8	997.5	34.2	16.2	170.7	14.9	6		2025-07-28T05:35:39	2025-07-28T19:10:21	0.11	Partially cloudy	Partly cloudy throughout the day.	partly-cloudy-day	CHI0000ZSCN,58606099999
Nanchang	2025-07-29	96.2	82.3	88.2	117.6	92.8	103.6	79.4	76.1	0.008	0	4.17	rain	0	0	19.2	6.3	20.4	995.8	31.4	18	231.4	19.9	7		2025-07-29T05:36:13	2025-07-29T19:09:43	0.14	Partially cloudy	Partly cloudy throughout the day.	partly-cloudy-day	CHI0000ZSCN,58606099999
Nanchang	2025-07-30	95.3	81.8	88.6	109.2	90.9	99.4	75.9	67.7	0.02	0	4.17	rain	0	0	21.3	7.8	10.8	996.1	15.3	18.5	277.6	23.8	8		2025-07-30T05:36:47	2025-07-30T19:09:05	0.17	Clear	Clear conditions throughout the day.	clear-day	CHI0000ZSCN,58606099999
Nanchang	2025-07-31	96.9	78.3	87.3	103.7	78.3	93.8	72.8	63.9	0	0	0		0	0	21.3	6.7	332.2	997.2	15.5	18.6	269.6	23.2	9		2025-07-31T05:37:21	2025-07-31T19:08:25	0.2	Clear	Clear conditions throughout the day.	clear-day	CHI0000ZSCN,58606099999
Nanchang	2025-08-01	97.1	81.8	87.8	108.2	88.5	98.7	76.2	69.5	0.051	100	4.17	rain	0	0	16.6	6.9	232.2	997.7	52.5	16.4	135.3	11.9	5		2025-08-01T05:37:54	2025-08-01T19:07:44	0.25	Rain, Partially cloudy	Partly cloudy throughout the day with morning rain.	rain	CHI0000ZSCN,58606099999
Nanchang	2025-08-02	98	82.8	90.4	111.9	92.9	104.4	77.8	68	0.004	0	0	rain	0	0	14.8	6	228.2	999	30.6	12.1	256.3	22.1	9		2025-08-02T05:38:28	2025-08-02T19:07:02	0.27	Partially cloudy	Partly cloudy throughout the day.	partly-cloudy-day	CHI0000ZSCN,58606099999
Nanchang	2025-08-03	98.7	84.6	91.3	116.6	96	106.5	78.2	66.5	0.008	0	4.17	rain	0	0	17	9.6	211.9	999.3	21.8	14.7	264	22.8	8		2025-08-03T05:39:02	2025-08-03T19:06:18	0.3	Partially cloudy	Partly cloudy throughout the day.	partly-cloudy-day	CHI0000ZSCN,58606099999
Nanchang	2025-08-04	98	84.1	91	112.9	94.8	104.4	77.1	64.9	0	0	0		0	0	16.8	6.7	179.1	1000.6	21.1	18.5	254.7	22.2	8		2025-08-04T05:39:36	2025-08-04T19:05:33	0.33	Partially cloudy	Partly cloudy throughout the day.	partly-cloudy-day	CHI0000ZSCN,58606099999
Nanchang	2025-08-05	98.3	83.4	90.5	113.7	94.4	104	77.3	66.4	0.004	0	0	rain	0	0	18.3	7.2	175.9	1001.8	34.1	18.6	250.8	21.7	8		2025-08-05T05:40:09	2025-08-05T19:04:48	0.37	Partially cloudy	Partly cloudy throughout the day.	partly-cloudy-day	CHI0000ZSCN,58606099999
Nanchang	2025-08-06	90.1	83.2	86.8	100.7	91.1	95.8	74.7	67.6	0.012	0	0	rain	0	0	28	11.9	196.3	1003.8	58.6	18.6	151.4	13	5		2025-08-06T05:40:43	2025-08-06T19:04:01	0.4	Partially cloudy	Partly cloudy throughout the day.	partly-cloudy-day	CHI0000ZSCN,58606099999
Nanchang	2025-08-07	92.4	78	84.6	102.7	78	91.4	74.5	72.8	0.815	100	8.33	rain	0	0.2	36.2	12.3	213	1005.9	64.4	13.6	202.6	17.6	8		2025-08-07T05:41:17	2025-08-07T19:03:13	0.43	Rain, Partially cloudy	Partly cloudy throughout the day with rain.	rain	CHI0000ZSCN,58606099999
Nanchang	2025-08-08	96.7	78.2	87.9	106.8	78.2	95.8	74.6	67	0	0	0		0	0	36.2	12.8	220	1005.2	59.7	14.8	262.5	22.8	9		2025-08-08T05:41:50	2025-08-08T19:02:24	0.46	Partially cloudy	Partly cloudy throughout the day.	partly-cloudy-day	CHI0000ZSCN,58606099999
Nanchang	2025-08-09	100.3	83.9	91.8	112.4	91.8	102.6	74.9	58.9	0	0	0		0	0	31.1	13	217.2	1003.9	66.4	17.8	249.3	21.7	9		2025-08-09T05:42:23	2025-08-09T19:01:34	0.5	Partially cloudy	Partly cloudy throughout the day.	partly-cloudy-day	CHI0000ZSCN,58606099999
Nanchang	2025-08-10	101.9	85.7	92.7	113.2	96	104.7	75.6	58.7	0	0	0		0	0	29.8	11.4	218.3	1003.7	65.3	15.2	253.5	21.9	8		2025-08-10T05:42:57	2025-08-10T19:00:43	0.53	Partially cloudy	Partly cloudy throughout the day.	partly-cloudy-day	CHI0000ZSCN,58606099999
Nanchang	2025-08-11	100.8	86.1	90.4	112.8	96.4	102.4	76.1	63.8	0.004	0	0	rain	0	0	25.3	11.6	240.1	1003.5	66	12.9	209	18.2	7		2025-08-11T05:43:30	2025-08-11T18:59:50	0.57	Partially cloudy	Partly cloudy throughout the day.	partly-cloudy-day	CHI0000ZSCN,58606099999
Nanchang	2025-08-12	99.1	82.8	89.2	113.3	93.1	101.4	77	69.2	0.078	100	12.5	rain	0	0	22.6	9.8	85.1	1005	51.6	14.6	237	20.3	8		2025-08-12T05:44:03	2025-08-12T18:58:57	0.6	Rain, Partially cloudy	Partly cloudy throughout the day with late afternoon rain.	rain	CHI0000ZSCN,58606099999
Nanchang	2025-08-13	96.2	82.1	88.4	114.1	91.7	102.7	78.8	74.3	0.225	100	20.83	rain	0	0	22.6	6.7	46.8	1006.9	56	15.5	204.7	17.6	7		2025-08-13T05:44:36	2025-08-13T18:58:03	0.64	Rain, Partially cloudy	Partly cloudy throughout the day with rain clearing later.	rain	CHI0000ZSCN,58606099999
Nanchang	2025-08-14	98.1	83.9	90.5	107.6	94.6	100.4	74.5	61.3	0	0	0		0	0	26.2	11.9	81.2	1007.2	18.5	16.4	261.3	22.5	8		2025-08-14T05:45:08	2025-08-14T18:57:08	0.67	Clear	Clear conditions throughout the day.	clear-day	CHI0000ZSCN,58606099999
Nanchang	2025-08-15	98.7	83.7	91.2	106.4	89.6	98.8	72	54.5	0	0	0		0	0	20.6	7.2	165.3	1009.8	12.3	18.6	285.7	24.7	9		2025-08-15T05:45:41	2025-08-15T18:56:12	0.71	Clear	Clear conditions throughout the day.	clear-day	CHI0000ZSCN,58606099999
Nanchang	2025-08-16	99.9	84.6	91.8	105.5	93.9	99.8	72.1	54.6	0	0	0		0	0	16.3	7.6	143.5	1009.2	6.2	18.5	286.5	24.8	9		2025-08-16T05:46:13	2025-08-16T18:55:15	0.75	Clear	Clear conditions throughout the day.	clear-day	CHI0000ZSCN,58606099999
Nanchang	2025-08-17	100.5	83.6	92.3	107.7	90.1	100.1	72	53.1	0	0	0		0	0	17.9	6.7	142.6	1009.5	7.3	18.6	278.7	24.1	9		2025-08-17T05:46:46	2025-08-17T18:54:18	0.78	Clear	Clear conditions throughout the day.	clear-day	CHI0000ZSCN,58606099999
Nanchang	2025-08-18	99.9	85.4	92.3	106.3	93.6	100.1	71.9	52.5	0	0	0		0	0	20.1	8.9	189.3	1010	9	18.6	258.6	22.3	8		2025-08-18T05:47:18	2025-08-18T18:53:19	0.82	Clear	Clear conditions throughout the day.	clear-day	CHI0000ZSCN,58606099999
Nanchang	2025-08-19	100.8	84.5	91.8	109	91.1	100	72.4	54.3	0	0	0		0	0	25.1	11.2	206.4	1008.8	8.5	18.4	281	24.3	9		2025-08-19T05:47:50	2025-08-19T18:52:20	0.85	Clear	Clear conditions throughout the day.	clear-day	CHI0000ZSCN,58606099999
Nanchang	2025-08-20	101.9	83.4	91.5	109.5	90.5	100.3	73.2	56.7	0	0	0		0	0	25.3	11.2	208.7	1007	29.7	18.6	265.5	22.9	9		2025-08-20T05:48:22	2025-08-20T18:51:19	0.89	Partially cloudy	Partly cloudy throughout the day.	partly-cloudy-day	CHI0000ZSCN,58606099999
Nanchang	2025-08-21	98.5	83	89.8	108.1	90.1	98.1	73.1	58.9	0.004	0	0	rain	0	0	26.6	11.2	211.8	1008.1	43.2	18.6	239.6	20.6	8		2025-08-21T05:48:53	2025-08-21T18:50:18	0.93	Partially cloudy	Partly cloudy throughout the day.	partly-cloudy-day	CHI0000ZSCN,58606099999
Nanchang	2025-08-22	96.7	79.1	86.1	104.7	79.1	92.7	73.5	68.5	0.236	100	4.17	rain	0	0	33.6	12.8	203.5	1008.2	42.4	16.4	213.7	18.5	7		2025-08-22T05:49:25	2025-08-22T18:49:17	0.96	Rain, Partially cloudy	Becoming cloudy in the afternoon with afternoon rain.	rain	CHI0000ZSCN,58606099999
Nanchang	2025-08-23	94.4	79.8	87	106.2	79.8	95.5	74.9	68.5	0.004	0	0	rain	0	0	33.6	8.9	184.1	1008.8	41.9	16.4	186.4	16.1	7		2025-08-23T05:49:56	2025-08-23T18:48:14	0	Partially cloudy	Clearing in the afternoon.	partly-cloudy-day	CHI0000ZSCN,58606099999
Nanchang	2025-08-24	100.5	84.3	91.7	110.9	92.4	100.6	73.2	56.5	0.02	100	4.17	rain	0	0	19.2	7.4	206.4	1009.6	38.4	16.3	263	22.6	9		2025-08-24T05:50:27	2025-08-24T18:47:11	0.03	Rain, Partially cloudy	Partly cloudy throughout the day with afternoon rain.	rain	CHI0000ZSCN,58606099999
Nanchang	2025-08-25	100.3	81.8	89.8	109.6	86.6	97.3	72.3	57.7	0.02	100	4.17	rain	0	0	19.7	8.9	197	1009.9	55.2	18.6	252.4	21.6	8		2025-08-25T05:50:58	2025-08-25T18:46:07	0.06	Rain, Partially cloudy	Partly cloudy throughout the day with late afternoon rain.	rain	CHI0000ZSCN,58606099999
Nanchang	2025-08-26	98.3	79.1	88.3	110.5	79.1	96.4	73.6	63	0.056	100	12.5	rain	0	0	29.1	8.7	67.4	1009.7	45.4	17.5	257.9	22.3	9		2025-08-26T05:51:29	2025-08-26T18:45:03	0.09	Rain, Partially cloudy	Partly cloudy throughout the day with afternoon rain.	rain	CHI0000ZSCN
Nanchang	2025-08-27	100.3	78.9	89.6	107.8	78.9	95.8	71.7	58	0	0	0		0	0	29.1	4.9	126.9	1008.1	15.3	17.5	270.8	23.3	9		2025-08-27T05:52:00	2025-08-27T18:43:57	0.13	Clear	Clear conditions throughout the day.	clear-day	CHI0000ZSCN
Nanchang	2025-08-28	100.5	83.4	91.1	106.5	87.9	97.7	70.9	53	0.004	0	0	rain	0	0	19	6.7	161.3	1008.1	19.7	18	264.5	22.8	9		2025-08-28T05:52:31	2025-08-28T18:42:52	0.16	Clear	Clear conditions throughout the day.	clear-day	CHI0000ZSCN
Nanchang	2025-08-29	101.6	82.1	91.9	114	88.8	101	73.4	56.5	0.008	0	4.17	rain	0	0	16.1	6	255.6	1009.9	14.8	17.3	251.1	21.6	8		2025-08-29T05:53:01	2025-08-29T18:41:45	0.19	Clear	Clear conditions throughout the day.	clear-day	CHI0000ZSCN
Nanchang	2025-08-30	94.4	81.2	87.7	109.3	88.8	100.1	77.5	72.4	0.21	100	41.67	rain	0	0	15	6	43.4	1010.3	89.2	18	128.3	10.9	4		2025-08-30T05:53:31	2025-08-30T18:40:39	0.22	Rain, Partially cloudy	Partly cloudy throughout the day with rain.	rain	CHI0000ZSCN

## Sheet: Valid Sample Data
Sample_ID	ValidFlag	Arrival Date	Survey Location	Gender	Age	Education Level	Place of Residence	Travel Mode	Travel Companion(s)	Number of Children	Length of Stay	Level of Attention to Weather Conditions	Adjusted Travel Plans Due to Weather	Travel Motivation – Historical and Cultural Sightseeing	Travel Motivation – Red Tourism Experience	Travel Motivation – Visiting Historic Districts	Travel Motivation – Visiting Museums or Memorial Halls	Travel Motivation – Visiting Historic Buildings and Archaeological Sites	Travel Motivation – Urban Leisure and Recreation	Travel Motivation – Family Trip or Accompanying Relatives/Friends	Travel Motivation – Business or Conference Trip	Travel Motivation – Other	Visited Heritage Site –Historic Architecture	Visited Heritage Site – Revolutionary Cultural Heritage	Visited Heritage Site – Historic and Cultural Districts	Visited Heritage Site – Museums / Memorial Halls	Visited Heritage Site –Archaeological Site Heritage	Visited Heritage Site – Religious Cultural Spaces	Visited Heritage Site – Intangible Cultural Heritage Experience	Weather Adaptation – Changed Visiting Time	Weather Adaptation – Reduced Outdoor Stay	Weather Adaptation – Increased Indoor Visits	Weather Adaptation – Switched to Nighttime Visits	Weather Adaptation – Cancelled Part of the Itinerary	Adjusted Travel Plans Due to Weather	Perceived Climate Comfort (PCC) Score	Perceived Climate Comfort (PCC) Category	Enumerator
NC2025-0001	Valid Samples	2025-07-06	Nanchang Railway Station	Male	25–34years	Bachelor's degree	Visitors from Other Provinces in China	High-Speed Rail / Train	Traveling with Friends	0	Less than Half a Day	Moderately Concerned	Yes	0	1	1	0	1	0	0	0	0	1	0	0	0	1	0	0	0	1	0	0	0	0	72	Very good	Enumerator 1
NC2025-0004	Valid Samples	2025-07-27	Nanchang West Railway Station	Female	18–24years	Bachelor's degree	Visitors from Other Provinces in China	High-Speed Rail / Train	Traveling Alone	0	1 Day	Moderately Concerned	Yes	1	0	1	1	1	1	0	0	0	0	1	0	1	0	0	0	0	0	0	1	0	0	63	Good	Enumerator 3
NC2025-0005	Valid Samples	2025-08-06	Nanchang West Railway Station	Female	18–24years	Bachelor's degree	Visitors from Other Cities in Jiangxi Province	High-Speed Rail / Train	Traveling with Friends	2	2–3 Days	Moderately Concerned	Yes	0	0	0	0	1	1	0	0	0	1	1	0	0	1	0	0	0	1	0	0	0	0	54	Acceptable	Enumerator 3
NC2025-0006	Valid Samples	2025-07-05	Nanchang Changbei International Airport	Male	35–44years	Bachelor's degree	Visitors from Other Cities in Jiangxi Province	Airplane	Traveling Alone	0	1 Day	Very Concerned	Yes	1	0	1	0	0	1	0	0	0	1	0	1	1	1	0	0	0	0	0	1	0	0	66	Good	Enumerator 1
NC2025-0007	Valid Samples	2025-07-03	Nanchang West Railway Station	Female	25–34years	Bachelor's degree	Local Visitors from Nanchang	High-Speed Rail / Train	Group Tour	0	1 Day	Very Concerned	No	1	1	1	1	1	1	0	0	0	1	1	0	0	0	0	0	0	0	0	0	0	1	84	Excellent	Enumerator 3
NC2025-0008	Valid Samples	2025-08-25	Nanchang South Railway Station	Female	25–34years	Associate degree	Local Visitors from Nanchang	High-Speed Rail / Train	Traveling with Friends	0	Less than Half a Day	Moderately Concerned	No	0	0	0	1	0	1	0	0	0	1	0	0	0	0	0	0	0	0	0	0	0	1	54	Acceptable	Enumerator 1
NC2025-0009	Valid Samples	2025-08-19	Nanchang West Railway Station	Female	≥60years	Bachelor's degree	Visitors from Other Cities in Jiangxi Province	High-Speed Rail / Train	Traveling with Friends	0	1 Day	Moderately Concerned	No	1	1	1	1	0	1	1	0	0	1	0	0	1	1	0	0	0	0	0	0	0	1	68	Good	Enumerator 1
NC2025-0010	Valid Samples	2025-08-22	Nanchang West Railway Station	Female	25–34years	Associate degree	Visitors from Other Provinces in China	Private Car	Group Tour	0	1 Day	Moderately Concerned	No	1	1	0	1	0	0	1	0	0	0	0	0	1	0	0	1	0	0	0	0	0	1	80	Excellent	Enumerator 4
NC2025-0011	Valid Samples	2025-07-28	Nanchang South Railway Station	Male	25–34years	High school or below	Visitors from Other Cities in Jiangxi Province	High-Speed Rail / Train	Group Tour	3	4–7 Days	Slightly Concerned	No	0	1	0	1	0	1	1	0	0	0	1	1	0	0	0	0	0	0	0	0	0	1	88	Excellent	Enumerator 1
NC2025-0012	Valid Samples	2025-08-11	Nanchang East Railway Station	Male	35–44years	Master's degree or above	Visitors from Other Cities in Jiangxi Province	High-Speed Rail / Train	Group Tour	1	2–3 Days	Not Concerned at All	Yes	1	0	0	0	0	0	0	0	0	1	1	0	1	0	0	1	0	0	0	0	0	0	55	Acceptable	Enumerator 2
NC2025-0013	Valid Samples	2025-06-30	Nanchang West Railway Station	Female	25–34years	Bachelor's degree	Visitors from Other Cities in Jiangxi Province	High-Speed Rail / Train	Group Tour	0	1 Day	Moderately Concerned	No	1	1	0	0	0	0	0	0	0	0	0	1	0	0	0	0	0	0	0	0	0	1	83	Excellent	Enumerator 2
NC2025-0014	Valid Samples	2025-07-06	Nanchang Railway Station	Female	18–24years	Bachelor's degree	Visitors from Other Cities in Jiangxi Province	Private Car	Traveling with Family/Children	1	1 Day	Very Concerned	No	1	0	1	1	0	1	0	0	0	1	0	0	1	1	0	0	0	0	0	0	0	1	73	Very good	Enumerator 3
NC2025-0015	Valid Samples	2025-07-21	Nanchang South Railway Station	Male	18–24years	Bachelor's degree	Visitors from Other Provinces in China	High-Speed Rail / Train	Traveling with Friends	0	2–3 Days	Neutral	No	1	1	1	0	0	1	0	0	0	0	1	0	0	1	0	0	0	0	0	0	0	1	67	Good	Enumerator 2
NC2025-0016	Valid Samples	2025-08-07	Nanchang Railway Station	Male	18–24years	Master's degree or above	Visitors from Other Cities in Jiangxi Province	Other	Traveling with Partner	0	1 Day	Neutral	No	1	1	1	1	0	0	0	0	0	1	0	1	0	0	1	1	0	0	0	0	0	1	55	Acceptable	Enumerator 4
NC2025-0017	Valid Samples	2025-08-19	Nanchang Railway Station	Male	18–24years	Associate degree	Visitors from Other Cities in Jiangxi Province	Long-Distance Bus	Traveling with Family/Children	3	4–7 Days	Moderately Concerned	Yes	1	0	1	1	0	1	0	0	0	1	0	1	0	0	0	0	1	1	0	0	1	0	50	Acceptable	Enumerator 2
NC2025-0018	Valid Samples	2025-07-13	Nanchang Railway Station	Male	18–24years	Bachelor's degree	Local Visitors from Nanchang	Private Car	Traveling with Family/Children	2	1 Day	Slightly Concerned	Yes	1	0	0	0	1	0	0	0	0	0	0	0	0	0	0	0	0	0	0	1	0	0	74	Very good	Enumerator 1
NC2025-0019	Valid Samples	2025-07-19	Nanchang Railway Station	Male	35–44years	Associate degree	Visitors from Other Cities in Jiangxi Province	Other	Traveling with Friends	0	1 Day	Very Concerned	Yes	1	1	0	1	0	1	0	0	0	1	1	1	0	1	0	0	0	0	1	0	0	0	45	Marginal	Enumerator 1
NC2025-0020	Valid Samples	2025-06-30	Nanchang Changbei International Airport	Male	25–34years	Bachelor's degree	Visitors from Other Provinces in China	Airplane	Traveling with Friends	0	1 Day	Moderately Concerned	Yes	1	1	0	1	0	1	0	0	0	0	0	1	1	0	0	0	0	1	1	1	0	0	74	Very good	Enumerator 4
NC2025-0021	Valid Samples	2025-08-07	Nanchang East Railway Station	Female	45–59years	Master's degree or above	Visitors from Other Provinces in China	Private Car	Traveling Alone	0	1 Day	Slightly Concerned	No	1	1	0	1	1	1	0	0	0	0	0	1	1	1	0	0	0	0	0	0	0	1	56	Acceptable	Enumerator 3
NC2025-0022	Valid Samples	2025-08-07	Nanchang Changbei International Airport	Female	25–34years	Bachelor's degree	Visitors from Other Cities in Jiangxi Province	Airplane	Group Tour	0	1 Day	Moderately Concerned	Yes	1	0	1	0	0	0	1	0	0	1	0	0	1	0	0	0	0	0	0	0	0	0	51	Acceptable	Enumerator 1
NC2025-0023	Valid Samples	2025-07-10	Nanchang East Railway Station	Female	18–24years	Bachelor's degree	Visitors from Other Provinces in China	High-Speed Rail / Train	Traveling with Partner	1	2–3 Days	Moderately Concerned	Yes	0	0	1	1	0	1	1	0	0	0	0	1	1	0	0	0	0	1	0	1	0	0	53	Acceptable	Enumerator 2
NC2025-0024	Valid Samples	2025-07-25	Nanchang Railway Station	Female	35–44years	Master's degree or above	Visitors from Other Provinces in China	High-Speed Rail / Train	Traveling Alone	2	2–3 Days	Moderately Concerned	No	0	0	0	0	1	0	0	0	1	1	0	0	0	1	0	0	0	0	0	0	0	1	75	Very good	Enumerator 3
NC2025-0025	Valid Samples	2025-08-27	Nanchang West Railway Station	Female	18–24years	Bachelor's degree	Visitors from Other Provinces in China	High-Speed Rail / Train	Traveling with Friends	0	1 Day	Moderately Concerned	No	1	0	0	1	0	0	0	0	0	1	0	1	0	0	0	1	0	0	0	0	0	1	67	Good	Enumerator 1
NC2025-0027	Valid Samples	2025-07-17	Nanchang West Railway Station	Male	25–34years	Bachelor's degree	Local Visitors from Nanchang	Private Car	Traveling with Friends	0	1 Day	Very Concerned	No	0	1	0	0	0	0	0	0	0	0	1	1	1	1	0	0	0	0	0	0	0	1	71	Very good	Enumerator 2
NC2025-0028	Valid Samples	2025-08-26	Nanchang South Railway Station	Female	25–34years	Associate degree	Local Visitors from Nanchang	High-Speed Rail / Train	Group Tour	0	1 Day	Moderately Concerned	Yes	0	1	1	1	0	1	1	0	0	0	0	1	1	0	0	1	0	0	0	0	0	0	86	Excellent	Enumerator 1
NC2025-0029	Valid Samples	2025-07-06	Nanchang South Railway Station	Male	25–34years	High school or below	Local Visitors from Nanchang	High-Speed Rail / Train	Traveling with Partner	0	Less than Half a Day	Moderately Concerned	No	1	0	1	1	0	0	0	0	0	1	0	0	1	1	0	0	0	0	0	0	0	1	75	Very good	Enumerator 4
NC2025-0030	Valid Samples	2025-08-24	Nanchang South Railway Station	Male	18–24years	High school or below	Visitors from Other Cities in Jiangxi Province	High-Speed Rail / Train	Traveling with Friends	0	2–3 Days	Moderately Concerned	Yes	1	0	0	0	1	0	0	0	0	1	0	1	0	0	0	0	0	0	1	0	1	0	55	Acceptable	Enumerator 4
NC2025-0031	Valid Samples	2025-07-07	Nanchang East Railway Station	Male	25–34years	Associate degree	Visitors from Other Provinces in China	High-Speed Rail / Train	Traveling with Friends	0	2–3 Days	Very Concerned	No	1	0	1	1	0	0	1	0	0	1	1	0	0	1	0	1	0	0	0	0	0	1	68	Good	Enumerator 3
NC2025-0032	Valid Samples	2025-08-09	Nanchang South Railway Station	Male	25–34years	Bachelor's degree	Visitors from Other Cities in Jiangxi Province	High-Speed Rail / Train	Traveling with Friends	0	1 Day	Slightly Concerned	No	1	1	1	0	0	1	1	0	0	1	1	1	1	0	0	0	0	0	0	0	0	1	84	Excellent	Enumerator 1
NC2025-0033	Valid Samples	2025-07-28	Nanchang West Railway Station	Female	45–59years	Bachelor's degree	Visitors from Other Provinces in China	High-Speed Rail / Train	Traveling with Family/Children	0	2–3 Days	Very Concerned	No	1	0	0	1	1	0	0	0	0	1	1	1	1	0	0	0	0	0	0	0	0	1	66	Good	Enumerator 1
NC2025-0034	Valid Samples	2025-07-28	Nanchang Changbei International Airport	Female	35–44years	Bachelor's degree	Visitors from Other Cities in Jiangxi Province	Private Car	Traveling with Friends	0	2–3 Days	Neutral	No	1	1	1	0	0	1	0	0	0	1	0	0	1	0	1	0	0	0	0	0	0	1	62	Good	Enumerator 3
NC2025-0035	Valid Samples	2025-08-24	Nanchang Changbei International Airport	Male	35–44years	Bachelor's degree	Visitors from Other Provinces in China	Airplane	Traveling with Partner	4	2–3 Days	Very Concerned	No	1	0	0	1	0	0	0	0	0	0	0	0	1	0	0	0	0	0	0	0	0	1	54	Acceptable	Enumerator 3
NC2025-0036	Valid Samples	2025-08-05	Nanchang Changbei International Airport	Male	45–59years	High school or below	Visitors from Other Cities in Jiangxi Province	Private Car	Traveling with Family/Children	0	Less than Half a Day	Very Concerned	Yes	1	0	1	0	0	1	1	0	0	1	0	1	1	1	0	0	0	1	0	0	0	0	59	Acceptable	Enumerator 1
NC2025-0037	Valid Samples	2025-08-15	Nanchang West Railway Station	Female	25–34years	Associate degree	Visitors from Other Cities in Jiangxi Province	Other	Traveling with Family/Children	1	2–3 Days	Very Concerned	Yes	1	0	0	0	1	1	0	0	0	1	0	0	0	0	0	0	0	0	0	0	0	0	56	Acceptable	Enumerator 1
NC2025-0038	Valid Samples	2025-07-21	Nanchang Changbei International Airport	Male	25–34years	Bachelor's degree	Visitors from Other Provinces in China	Private Car	Traveling with Friends	0	1 Day	Moderately Concerned	No	0	0	0	0	1	1	0	0	0	0	0	0	1	0	0	0	0	0	0	0	0	1	73	Very good	Enumerator 4
NC2025-0039	Valid Samples	2025-08-23	Nanchang West Railway Station	Male	25–34years	High school or below	Local Visitors from Nanchang	Local Public Transportation	Traveling with Family/Children	0	2–3 Days	Very Concerned	No	1	1	0	0	0	1	1	0	0	0	1	0	0	0	0	0	0	0	0	0	0	1	47	Marginal	Enumerator 2
NC2025-0040	Valid Samples	2025-08-24	Nanchang Changbei International Airport	Female	18–24years	Master's degree or above	Visitors from Other Provinces in China	Airplane	Traveling with Family/Children	0	2–3 Days	Very Concerned	No	0	0	1	0	1	0	0	0	1	1	0	1	1	0	0	0	0	0	0	0	0	1	47	Marginal	Enumerator 4
NC2025-0041	Valid Samples	2025-08-19	Nanchang Railway Station	Female	25–34years	Master's degree or above	Visitors from Other Provinces in China	Private Car	Traveling with Family/Children	0	2–3 Days	Not Concerned at All	No	0	1	1	1	0	0	0	0	0	0	0	0	0	0	0	0	0	0	0	0	0	1	54	Acceptable	Enumerator 4
NC2025-0042	Valid Samples	2025-08-29	Nanchang Changbei International Airport	Female	18–24years	Associate degree	Visitors from Other Cities in Jiangxi Province	Private Car	Traveling with Partner	1	1 Day	Very Concerned	No	1	1	0	0	1	0	0	0	0	1	0	0	1	0	0	0	0	0	0	0	0	1	63	Good	Enumerator 1
NC2025-0043	Valid Samples	2025-07-21	Nanchang Changbei International Airport	Female	35–44years	Bachelor's degree	Visitors from Other Cities in Jiangxi Province	Private Car	Traveling Alone	0	1 Day	Very Concerned	No	1	1	1	0	0	0	1	0	0	1	0	1	0	1	0	0	0	0	0	0	0	1	75	Very good	Enumerator 2
NC2025-0044	Valid Samples	2025-07-18	Nanchang West Railway Station	Male	18–24years	Associate degree	Visitors from Other Provinces in China	High-Speed Rail / Train	Traveling with Partner	1	2–3 Days	Moderately Concerned	Yes	0	1	0	0	0	0	0	0	0	1	0	1	0	0	0	0	0	0	0	0	0	0	71	Very good	Enumerator 4
NC2025-0045	Valid Samples	2025-07-02	Nanchang Changbei International Airport	Male	18–24years	Master's degree or above	Local Visitors from Nanchang	Airplane	Traveling with Family/Children	1	2–3 Days	Very Concerned	Yes	0	0	0	0	1	0	1	0	0	1	0	0	0	0	0	1	0	0	0	1	0	0	74	Very good	Enumerator 1
NC2025-0046	Valid Samples	2025-08-05	Nanchang Changbei International Airport	Male	25–34years	Bachelor's degree	Visitors from Other Cities in Jiangxi Province	Airplane	Traveling with Family/Children	0	1 Day	Moderately Concerned	Yes	1	1	0	1	0	0	0	0	0	1	0	0	1	0	1	0	0	0	0	0	0	0	66	Good	Enumerator 4
NC2025-0047	Valid Samples	2025-08-22	Nanchang East Railway Station	Male	35–44years	Associate degree	Visitors from Other Cities in Jiangxi Province	High-Speed Rail / Train	Traveling with Family/Children	0	2–3 Days	Very Concerned	No	1	0	1	1	0	1	0	0	0	0	0	0	0	0	0	0	0	0	0	0	0	1	85	Excellent	Enumerator 4
NC2025-0048	Valid Samples	2025-07-10	Nanchang Railway Station	Male	35–44years	Master's degree or above	Visitors from Other Cities in Jiangxi Province	High-Speed Rail / Train	Traveling with Friends	2	4–7 Days	Very Concerned	No	0	1	0	1	0	1	1	0	0	1	0	0	0	0	0	1	0	0	0	0	0	1	73	Very good	Enumerator 4
NC2025-0049	Valid Samples	2025-08-16	Nanchang West Railway Station	Female	18–24years	Bachelor's degree	Visitors from Other Cities in Jiangxi Province	High-Speed Rail / Train	Traveling with Family/Children	1	4–7 Days	Neutral	Yes	0	1	1	0	0	1	0	0	0	0	1	1	0	1	0	0	0	0	0	0	0	0	62	Good	Enumerator 4
NC2025-0050	Valid Samples	2025-07-16	Nanchang South Railway Station	Female	18–24years	Bachelor's degree	Visitors from Other Cities in Jiangxi Province	High-Speed Rail / Train	Traveling with Friends	0	1 Day	Neutral	Yes	1	0	0	0	1	0	0	0	0	0	0	0	0	1	0	0	0	0	0	0	0	0	71	Very good	Enumerator 2
NC2025-0051	Valid Samples	2025-08-05	Nanchang East Railway Station	Male	≥60years	Bachelor's degree	Visitors from Other Provinces in China	High-Speed Rail / Train	Traveling with Partner	2	2–3 Days	Moderately Concerned	Yes	0	1	1	0	0	0	0	0	0	1	1	0	0	0	1	1	0	0	0	0	1	0	41	Marginal	Enumerator 1
NC2025-0052	Valid Samples	2025-07-01	Nanchang East Railway Station	Male	≥60years	Associate degree	Visitors from Other Provinces in China	High-Speed Rail / Train	Group Tour	0	2–3 Days	Neutral	Yes	0	0	1	0	1	0	1	0	0	0	0	1	0	0	0	0	1	0	1	0	0	0	54	Acceptable	Enumerator 4
NC2025-0053	Valid Samples	2025-08-01	Nanchang Changbei International Airport	Male	35–44years	Bachelor's degree	Visitors from Other Provinces in China	Airplane	Traveling with Family/Children	2	1 Day	Very Concerned	No	0	0	1	1	0	1	0	0	1	1	0	0	0	0	0	0	0	0	0	0	0	1	78	Very good	Enumerator 4
NC2025-0054	Valid Samples	2025-08-18	Nanchang Changbei International Airport	Male	18–24years	High school or below	Visitors from Other Cities in Jiangxi Province	Airplane	Traveling with Friends	0	Less than Half a Day	Moderately Concerned	Yes	1	1	0	0	0	0	0	0	0	1	0	1	1	0	0	1	1	0	0	0	0	0	70	Very good	Enumerator 3
NC2025-0056	Valid Samples	2025-08-16	Nanchang Changbei International Airport	Female	18–24years	High school or below	Visitors from Other Cities in Jiangxi Province	Airplane	Traveling with Friends	1	1 Day	Moderately Concerned	No	1	1	0	0	0	0	0	1	0	1	0	1	0	0	0	0	0	0	0	0	0	1	65	Good	Enumerator 3
NC2025-0057	Valid Samples	2025-08-10	Nanchang Changbei International Airport	Male	25–34years	Bachelor's degree	Visitors from Other Provinces in China	Airplane	Traveling with Friends	0	2–3 Days	Moderately Concerned	No	1	0	1	0	0	1	0	0	0	0	1	1	1	0	0	0	0	0	0	0	0	1	51	Acceptable	Enumerator 3
NC2025-0058	Valid Samples	2025-08-28	Nanchang East Railway Station	Female	≥60years	Bachelor's degree	Visitors from Other Cities in Jiangxi Province	High-Speed Rail / Train	Traveling Alone	2	2–3 Days	Very Concerned	No	0	1	1	0	0	0	0	0	0	0	0	0	0	1	0	0	0	0	0	0	0	1	82	Excellent	Enumerator 1
NC2025-0059	Valid Samples	2025-08-20	Nanchang East Railway Station	Male	35–44years	Bachelor's degree	Visitors from Other Provinces in China	High-Speed Rail / Train	Traveling with Family/Children	3	2–3 Days	Moderately Concerned	Yes	1	0	1	1	1	1	1	1	0	1	0	1	1	0	0	0	0	0	0	0	0	0	65	Good	Enumerator 3
NC2025-0060	Valid Samples	2025-07-30	Nanchang East Railway Station	Male	35–44years	Bachelor's degree	Visitors from Other Cities in Jiangxi Province	High-Speed Rail / Train	Traveling with Friends	0	Less than Half a Day	Moderately Concerned	No	0	0	0	1	0	1	0	0	0	0	0	0	0	0	0	0	0	0	0	0	0	1	54	Acceptable	Enumerator 2
NC2025-0061	Valid Samples	2025-07-29	Nanchang Railway Station	Male	25–34years	Associate degree	Visitors from Other Provinces in China	High-Speed Rail / Train	Traveling with Friends	2	2–3 Days	Moderately Concerned	Yes	0	1	1	1	0	1	1	0	0	1	0	1	1	0	0	0	0	0	0	0	0	0	78	Very good	Enumerator 4
NC2025-0062	Valid Samples	2025-08-16	Nanchang South Railway Station	Female	35–44years	Associate degree	Local Visitors from Nanchang	High-Speed Rail / Train	Traveling with Friends	0	Less than Half a Day	Very Concerned	No	0	0	1	0	0	1	0	0	0	0	1	1	1	0	0	0	0	0	0	0	0	1	81	Excellent	Enumerator 3
NC2025-0063	Valid Samples	2025-07-10	Nanchang Railway Station	Female	18–24years	Master's degree or above	Visitors from Other Cities in Jiangxi Province	High-Speed Rail / Train	Traveling with Friends	1	1 Day	Moderately Concerned	Yes	1	0	0	1	0	1	0	1	0	1	0	1	0	0	0	1	0	0	1	0	0	0	62	Good	Enumerator 2
NC2025-0064	Valid Samples	2025-07-10	Nanchang South Railway Station	Female	25–34years	Bachelor's degree	Visitors from Other Cities in Jiangxi Province	High-Speed Rail / Train	Traveling with Family/Children	0	4–7 Days	Neutral	No	1	1	1	0	0	1	1	0	0	1	0	1	1	1	0	0	0	0	0	0	0	1	64	Good	Enumerator 2
NC2025-0065	Valid Samples	2025-07-10	Nanchang East Railway Station	Female	18–24years	Associate degree	Visitors from Other Provinces in China	Private Car	Traveling with Partner	1	2–3 Days	Slightly Concerned	Yes	1	0	0	0	1	0	1	0	0	1	0	0	0	1	1	0	0	1	0	0	0	0	60	Good	Enumerator 2
NC2025-0066	Valid Samples	2025-08-29	Nanchang Railway Station	Female	18–24years	High school or below	Visitors from Other Provinces in China	High-Speed Rail / Train	Traveling with Family/Children	0	1 Day	Neutral	No	0	1	1	0	0	1	0	0	0	1	0	0	0	0	0	0	0	0	0	0	0	1	65	Good	Enumerator 4
NC2025-0067	Valid Samples	2025-08-08	Nanchang Railway Station	Female	18–24years	Associate degree	Visitors from Other Cities in Jiangxi Province	Private Car	Traveling with Friends	0	1 Day	Moderately Concerned	Yes	0	0	0	0	0	1	1	0	0	0	0	0	1	1	0	0	0	0	0	0	0	0	86	Excellent	Enumerator 3
NC2025-0068	Valid Samples	2025-07-22	Nanchang Railway Station	Female	45–59years	Bachelor's degree	Visitors from Other Provinces in China	High-Speed Rail / Train	Group Tour	0	1 Day	Slightly Concerned	No	1	0	0	1	0	0	1	0	0	1	1	1	0	0	0	0	0	0	0	0	0	1	65	Good	Enumerator 2
NC2025-0069	Valid Samples	2025-08-26	Nanchang South Railway Station	Female	35–44years	Associate degree	Visitors from Other Provinces in China	High-Speed Rail / Train	Traveling with Friends	1	2–3 Days	Neutral	Yes	1	0	0	0	0	0	1	0	0	1	0	1	0	0	0	1	0	0	0	0	0	0	65	Good	Enumerator 1
NC2025-0070	Valid Samples	2025-08-22	Nanchang South Railway Station	Male	18–24years	Bachelor's degree	Visitors from Other Cities in Jiangxi Province	High-Speed Rail / Train	Traveling with Family/Children	0	Less than Half a Day	Moderately Concerned	No	1	0	0	0	0	1	0	0	0	1	0	1	1	0	0	0	0	0	0	0	0	1	48	Marginal	Enumerator 2
NC2025-0071	Valid Samples	2025-08-11	Nanchang Railway Station	Female	25–34years	Bachelor's degree	Visitors from Other Provinces in China	High-Speed Rail / Train	Traveling with Family/Children	0	2–3 Days	Neutral	No	1	0	1	0	0	1	0	0	0	1	0	0	1	0	0	0	0	0	0	0	0	1	67	Good	Enumerator 1
NC2025-0072	Valid Samples	2025-07-19	Nanchang East Railway Station	Female	35–44years	Associate degree	Visitors from Other Provinces in China	High-Speed Rail / Train	Traveling with Family/Children	0	2–3 Days	Moderately Concerned	No	0	0	0	0	0	1	0	1	0	0	0	0	0	0	0	1	0	0	0	0	0	1	77	Very good	Enumerator 1
NC2025-0073	Valid Samples	2025-08-12	Nanchang Changbei International Airport	Female	35–44years	Bachelor's degree	Visitors from Other Cities in Jiangxi Province	Private Car	Traveling with Friends	1	2–3 Days	Neutral	No	1	0	1	0	0	0	0	0	0	1	1	0	1	0	0	1	0	0	0	0	0	1	82	Excellent	Enumerator 4
NC2025-0074	Valid Samples	2025-07-24	Nanchang Changbei International Airport	Female	18–24years	Associate degree	Visitors from Other Provinces in China	Airplane	Traveling with Friends	1	2–3 Days	Very Concerned	No	1	1	0	1	0	0	0	0	0	0	0	1	1	1	1	1	0	0	0	0	0	1	76	Very good	Enumerator 2
NC2025-0075	Valid Samples	2025-08-25	Nanchang East Railway Station	Female	18–24years	Bachelor's degree	Visitors from Other Cities in Jiangxi Province	Private Car	Group Tour	0	Less than Half a Day	Neutral	Yes	1	0	0	0	0	1	0	0	0	0	1	0	0	0	0	0	0	0	0	1	0	0	58	Acceptable	Enumerator 3
NC2025-0076	Valid Samples	2025-07-07	Nanchang South Railway Station	Male	35–44years	Bachelor's degree	Visitors from Other Cities in Jiangxi Province	High-Speed Rail / Train	Traveling with Friends	0	2–3 Days	Slightly Concerned	No	0	0	1	0	0	0	0	0	0	0	1	0	0	0	0	0	0	0	0	0	0	1	73	Very good	Enumerator 3
NC2025-0077	Valid Samples	2025-08-07	Nanchang Railway Station	Male	25–34years	Bachelor's degree	Visitors from Other Provinces in China	Private Car	Traveling with Partner	0	Less than Half a Day	Neutral	Yes	1	0	0	0	0	0	0	1	0	1	0	1	0	0	0	0	0	1	0	0	0	0	85	Excellent	Enumerator 1
NC2025-0078	Valid Samples	2025-08-10	Nanchang West Railway Station	Female	25–34years	Bachelor's degree	Local Visitors from Nanchang	Local Public Transportation	Group Tour	1	2–3 Days	Moderately Concerned	Yes	1	0	1	0	0	0	1	0	0	0	0	0	0	0	0	0	1	0	1	0	0	0	89	Excellent	Enumerator 3
NC2025-0079	Valid Samples	2025-07-17	Nanchang West Railway Station	Female	45–59years	Master's degree or above	Visitors from Other Provinces in China	Long-Distance Bus	Traveling with Friends	0	4–7 Days	Very Concerned	No	1	1	1	0	0	1	0	0	0	1	0	1	0	0	0	0	0	0	0	0	0	1	68	Good	Enumerator 2
NC2025-0080	Valid Samples	2025-07-24	Nanchang Changbei International Airport	Female	25–34years	Associate degree	Visitors from Other Cities in Jiangxi Province	Airplane	Group Tour	0	2–3 Days	Neutral	No	1	1	0	0	0	1	0	0	0	0	0	1	1	0	0	1	0	0	0	0	0	1	67	Good	Enumerator 1
NC2025-0081	Valid Samples	2025-07-18	Nanchang West Railway Station	Male	25–34years	Master's degree or above	Visitors from Hong Kong, Macao, Taiwan, and Overseas	High-Speed Rail / Train	Group Tour	0	2–3 Days	Neutral	Yes	1	0	1	0	0	1	0	0	0	1	0	1	0	0	0	0	1	0	1	0	0	0	61	Good	Enumerator 4
NC2025-0082	Valid Samples	2025-08-17	Nanchang West Railway Station	Male	18–24years	Bachelor's degree	Visitors from Other Cities in Jiangxi Province	High-Speed Rail / Train	Traveling with Friends	0	4–7 Days	Neutral	No	1	0	0	0	1	0	0	0	0	1	0	1	0	0	0	0	0	0	0	0	0	1	66	Good	Enumerator 4
NC2025-0083	Valid Samples	2025-07-30	Nanchang West Railway Station	Female	25–34years	Bachelor's degree	Visitors from Other Provinces in China	High-Speed Rail / Train	Traveling with Partner	0	1 Day	Slightly Concerned	Yes	0	0	0	0	0	0	0	0	0	0	0	1	1	0	0	0	0	0	1	0	0	0	66	Good	Enumerator 4
NC2025-0084	Valid Samples	2025-07-29	Nanchang Railway Station	Male	18–24years	Bachelor's degree	Visitors from Other Cities in Jiangxi Province	Private Car	Traveling with Friends	0	4–7 Days	Moderately Concerned	No	1	0	0	1	1	0	0	0	0	0	0	0	1	1	1	0	0	0	0	0	0	1	46	Marginal	Enumerator 4
NC2025-0085	Valid Samples	2025-07-26	Nanchang East Railway Station	Female	25–34years	Bachelor's degree	Visitors from Other Cities in Jiangxi Province	High-Speed Rail / Train	Group Tour	0	2–3 Days	Moderately Concerned	No	0	0	1	0	0	0	0	0	0	0	1	0	1	0	0	0	0	0	0	0	0	1	57	Acceptable	Enumerator 2
NC2025-0087	Valid Samples	2025-08-21	Nanchang Changbei International Airport	Female	45–59years	Master's degree or above	Visitors from Other Provinces in China	Airplane	Traveling with Friends	0	2–3 Days	Neutral	Yes	0	1	1	0	0	0	1	0	1	1	1	0	1	0	0	1	0	1	1	0	0	0	84	Excellent	Enumerator 4
NC2025-0088	Valid Samples	2025-08-03	Nanchang East Railway Station	Male	18–24years	Master's degree or above	Visitors from Other Cities in Jiangxi Province	Private Car	Traveling with Friends	0	4–7 Days	Very Concerned	Yes	1	1	1	1	0	1	0	1	0	1	0	0	1	0	0	0	0	0	0	0	0	0	57	Acceptable	Enumerator 1
NC2025-0089	Valid Samples	2025-07-09	Nanchang Changbei International Airport	Male	25–34years	Bachelor's degree	Visitors from Other Provinces in China	Airplane	Traveling with Friends	0	4–7 Days	Very Concerned	No	0	1	1	0	0	1	0	0	0	1	0	1	0	0	0	0	0	0	0	0	0	1	84	Excellent	Enumerator 3
NC2025-0090	Valid Samples	2025-08-06	Nanchang West Railway Station	Female	25–34years	Bachelor's degree	Visitors from Other Provinces in China	High-Speed Rail / Train	Traveling with Friends	0	2–3 Days	Moderately Concerned	No	1	0	1	1	0	1	0	0	0	1	1	1	0	0	0	1	0	0	0	0	0	1	85	Excellent	Enumerator 3
NC2025-0091	Valid Samples	2025-08-24	Nanchang South Railway Station	Male	18–24years	Associate degree	Visitors from Other Cities in Jiangxi Province	High-Speed Rail / Train	Traveling with Friends	0	2–3 Days	Moderately Concerned	No	0	0	1	0	0	0	0	0	0	1	1	0	0	1	0	0	0	0	0	0	0	1	66	Good	Enumerator 3
NC2025-0092	Valid Samples	2025-07-23	Nanchang Changbei International Airport	Male	18–24years	Associate degree	Visitors from Other Cities in Jiangxi Province	Airplane	Traveling with Family/Children	1	2–3 Days	Moderately Concerned	Yes	0	0	0	1	0	0	0	1	0	0	1	0	0	1	0	0	0	0	1	0	0	0	76	Very good	Enumerator 3
NC2025-0093	Valid Samples	2025-06-30	Nanchang Railway Station	Male	45–59years	Master's degree or above	Visitors from Other Provinces in China	High-Speed Rail / Train	Group Tour	2	Less than Half a Day	Moderately Concerned	No	1	1	1	0	0	0	0	0	0	1	0	1	0	0	0	0	0	0	0	0	0	1	74	Very good	Enumerator 3
NC2025-0094	Valid Samples	2025-08-25	Nanchang West Railway Station	Male	18–24years	Associate degree	Visitors from Other Provinces in China	High-Speed Rail / Train	Traveling Alone	1	2–3 Days	Moderately Concerned	Yes	1	0	0	1	1	0	0	0	0	0	0	1	0	0	1	0	0	0	0	0	0	0	71	Very good	Enumerator 3
NC2025-0095	Valid Samples	2025-08-06	Nanchang West Railway Station	Female	45–59years	Bachelor's degree	Local Visitors from Nanchang	Private Car	Traveling with Family/Children	0	2–3 Days	Neutral	No	0	0	0	1	0	0	0	0	0	0	1	0	0	1	0	0	0	0	0	0	0	1	73	Very good	Enumerator 2
NC2025-0096	Valid Samples	2025-07-27	Nanchang South Railway Station	Female	25–34years	Bachelor's degree	Visitors from Other Provinces in China	High-Speed Rail / Train	Traveling with Friends	0	Less than Half a Day	Very Concerned	No	1	0	0	0	0	0	1	0	0	0	0	1	0	1	0	0	0	0	0	0	0	1	48	Marginal	Enumerator 3
NC2025-0097	Valid Samples	2025-07-05	Nanchang West Railway Station	Male	18–24years	Master's degree or above	Local Visitors from Nanchang	High-Speed Rail / Train	Traveling with Family/Children	1	2–3 Days	Neutral	Yes	1	0	1	0	1	0	0	0	0	0	0	1	1	0	0	0	0	1	0	0	0	0	64	Good	Enumerator 2
NC2025-0098	Valid Samples	2025-07-11	Nanchang Changbei International Airport	Female	18–24years	Associate degree	Visitors from Other Cities in Jiangxi Province	Airplane	Traveling with Friends	1	Less than Half a Day	Neutral	No	1	1	1	0	0	0	0	0	0	0	0	1	0	1	0	0	0	0	0	0	0	1	42	Marginal	Enumerator 2
NC2025-0099	Valid Samples	2025-08-03	Nanchang East Railway Station	Male	35–44years	Bachelor's degree	Visitors from Other Cities in Jiangxi Province	Private Car	Traveling with Family/Children	0	2–3 Days	Neutral	No	1	0	1	0	0	1	0	1	0	0	1	1	0	0	0	0	0	0	0	0	0	1	63	Good	Enumerator 2
NC2025-0100	Valid Samples	2025-07-30	Nanchang Changbei International Airport	Male	25–34years	High school or below	Visitors from Other Provinces in China	Airplane	Traveling with Family/Children	0	Less than Half a Day	Neutral	Yes	0	0	0	1	1	0	0	0	0	1	0	1	1	0	0	0	0	1	1	0	0	0	71	Very good	Enumerator 2
NC2025-0101	Valid Samples	2025-06-30	Nanchang Changbei International Airport	Male	18–24years	Bachelor's degree	Visitors from Other Cities in Jiangxi Province	Airplane	Traveling with Partner	0	2–3 Days	Moderately Concerned	No	1	1	0	0	0	0	0	0	0	1	0	1	1	0	0	0	0	0	0	0	0	1	49	Marginal	Enumerator 2
NC2025-0102	Valid Samples	2025-08-19	Nanchang Changbei International Airport	Male	25–34years	High school or below	Visitors from Other Cities in Jiangxi Province	Private Car	Traveling with Friends	1	1 Day	Very Concerned	No	1	0	1	0	0	1	0	0	0	1	0	0	0	0	0	0	0	0	0	0	0	1	54	Acceptable	Enumerator 4
NC2025-0103	Valid Samples	2025-08-29	Nanchang Changbei International Airport	Male	45–59years	Associate degree	Visitors from Other Cities in Jiangxi Province	Private Car	Traveling with Family/Children	0	1 Day	Very Concerned	Yes	0	0	0	1	0	0	0	0	0	1	0	1	0	0	0	0	0	1	0	0	0	0	71	Very good	Enumerator 3
NC2025-0104	Valid Samples	2025-08-16	Nanchang South Railway Station	Female	25–34years	Associate degree	Visitors from Other Provinces in China	High-Speed Rail / Train	Traveling with Partner	0	4–7 Days	Very Concerned	Yes	1	1	1	0	0	0	0	0	0	0	0	1	1	0	0	0	0	1	0	0	0	0	59	Acceptable	Enumerator 3
NC2025-0105	Valid Samples	2025-07-26	Nanchang Changbei International Airport	Male	18–24years	Associate degree	Local Visitors from Nanchang	Airplane	Traveling with Family/Children	0	1 Day	Slightly Concerned	No	1	0	1	0	0	0	0	0	0	1	0	0	1	0	0	1	0	0	0	0	0	1	78	Very good	Enumerator 3
NC2025-0106	Valid Samples	2025-08-24	Nanchang Railway Station	Female	35–44years	Bachelor's degree	Visitors from Other Provinces in China	Private Car	Traveling with Friends	0	2–3 Days	Very Concerned	No	0	1	1	0	0	1	0	0	0	1	1	1	1	0	0	0	0	0	0	0	0	1	72	Very good	Enumerator 3
NC2025-0107	Valid Samples	2025-07-28	Nanchang East Railway Station	Male	25–34years	Bachelor's degree	Visitors from Other Provinces in China	High-Speed Rail / Train	Group Tour	0	4–7 Days	Neutral	No	0	1	0	1	0	0	1	0	0	1	1	1	1	0	0	0	0	0	0	0	0	1	89	Excellent	Enumerator 4
NC2025-0108	Valid Samples	2025-07-07	Nanchang South Railway Station	Female	35–44years	High school or below	Visitors from Other Provinces in China	High-Speed Rail / Train	Traveling Alone	1	2–3 Days	Very Concerned	No	0	1	1	0	1	1	0	0	0	1	0	0	1	0	0	0	0	0	0	0	0	1	62	Good	Enumerator 4
NC2025-0109	Valid Samples	2025-07-14	Nanchang South Railway Station	Male	25–34years	Bachelor's degree	Visitors from Other Provinces in China	High-Speed Rail / Train	Group Tour	1	2–3 Days	Not Concerned at All	No	1	0	1	1	0	0	0	0	0	1	1	1	0	1	0	0	0	0	0	0	0	1	59	Acceptable	Enumerator 4
NC2025-0110	Valid Samples	2025-07-07	Nanchang Railway Station	Female	25–34years	Bachelor's degree	Visitors from Other Provinces in China	High-Speed Rail / Train	Traveling Alone	0	2–3 Days	Moderately Concerned	Yes	1	1	1	0	0	0	0	0	0	0	0	1	1	0	0	0	0	1	0	0	0	0	43	Marginal	Enumerator 3
NC2025-0111	Valid Samples	2025-08-18	Nanchang East Railway Station	Female	35–44years	Bachelor's degree	Visitors from Other Provinces in China	High-Speed Rail / Train	Group Tour	4	2–3 Days	Moderately Concerned	No	0	1	1	0	0	1	0	0	0	0	0	1	1	1	0	0	0	0	0	0	0	1	57	Acceptable	Enumerator 4
NC2025-0112	Valid Samples	2025-08-06	Nanchang East Railway Station	Female	≥60years	Bachelor's degree	Visitors from Other Cities in Jiangxi Province	High-Speed Rail / Train	Group Tour	0	2–3 Days	Very Concerned	Yes	0	0	1	0	0	0	0	0	0	1	1	1	1	0	1	0	0	0	0	0	0	0	78	Very good	Enumerator 2
NC2025-0113	Valid Samples	2025-07-09	Nanchang Changbei International Airport	Male	25–34years	High school or below	Local Visitors from Nanchang	Airplane	Traveling with Partner	0	2–3 Days	Slightly Concerned	No	1	0	0	1	0	0	1	1	0	0	0	0	0	0	0	0	0	0	0	0	0	1	82	Excellent	Enumerator 1
NC2025-0114	Valid Samples	2025-08-14	Nanchang West Railway Station	Male	45–59years	High school or below	Visitors from Other Cities in Jiangxi Province	Local Public Transportation	Traveling with Friends	0	1 Day	Neutral	No	1	1	1	0	0	1	0	0	0	0	0	0	1	0	0	0	0	0	0	0	0	1	72	Very good	Enumerator 2
NC2025-0115	Valid Samples	2025-08-19	Nanchang Railway Station	Male	35–44years	Bachelor's degree	Visitors from Other Provinces in China	Private Car	Traveling with Friends	0	1 Day	Slightly Concerned	Yes	1	1	0	1	0	0	0	0	0	1	0	1	0	0	0	0	0	0	1	1	0	0	47	Marginal	Enumerator 2
NC2025-0116	Valid Samples	2025-08-10	Nanchang South Railway Station	Male	18–24years	Bachelor's degree	Visitors from Other Provinces in China	High-Speed Rail / Train	Group Tour	0	4–7 Days	Neutral	Yes	1	1	0	1	0	0	0	0	0	0	0	0	1	0	0	1	0	0	0	1	0	0	47	Marginal	Enumerator 2
NC2025-0117	Valid Samples	2025-08-29	Nanchang Changbei International Airport	Male	35–44years	Bachelor's degree	Visitors from Other Cities in Jiangxi Province	Airplane	Traveling with Family/Children	0	2–3 Days	Moderately Concerned	No	1	0	0	0	0	0	0	0	0	0	1	1	0	1	0	1	0	0	0	0	0	1	52	Acceptable	Enumerator 4
NC2025-0118	Valid Samples	2025-07-30	Nanchang West Railway Station	Male	35–44years	Bachelor's degree	Visitors from Other Cities in Jiangxi Province	High-Speed Rail / Train	Traveling with Family/Children	0	Less than Half a Day	Very Concerned	No	0	0	1	1	0	1	0	0	0	0	1	1	0	1	0	0	0	0	0	0	0	1	61	Good	Enumerator 2
NC2025-0119	Valid Samples	2025-08-07	Nanchang West Railway Station	Male	35–44years	Associate degree	Visitors from Other Cities in Jiangxi Province	Long-Distance Bus	Traveling with Friends	0	2–3 Days	Moderately Concerned	No	1	0	1	0	1	1	0	0	0	1	1	0	0	0	1	0	0	0	0	0	0	1	58	Acceptable	Enumerator 4
NC2025-0120	Valid Samples	2025-08-05	Nanchang Changbei International Airport	Female	35–44years	Master's degree or above	Visitors from Other Provinces in China	Airplane	Traveling with Family/Children	1	2–3 Days	Neutral	Yes	1	0	0	1	1	0	0	0	0	0	0	1	0	0	0	0	1	0	1	0	0	0	60	Good	Enumerator 3
NC2025-0121	Valid Samples	2025-07-28	Nanchang West Railway Station	Female	25–34years	Bachelor's degree	Visitors from Other Provinces in China	Long-Distance Bus	Traveling with Friends	0	1 Day	Moderately Concerned	Yes	0	0	1	0	0	0	0	0	0	1	0	1	0	0	0	0	0	1	0	1	0	0	72	Very good	Enumerator 2
NC2025-0122	Valid Samples	2025-08-14	Nanchang Railway Station	Female	18–24years	Bachelor's degree	Visitors from Other Provinces in China	High-Speed Rail / Train	Traveling with Family/Children	1	2–3 Days	Slightly Concerned	Yes	1	0	0	1	0	0	0	0	0	1	0	0	1	0	0	0	0	0	0	0	0	0	55	Acceptable	Enumerator 3
NC2025-0123	Valid Samples	2025-07-15	Nanchang West Railway Station	Male	25–34years	Associate degree	Local Visitors from Nanchang	High-Speed Rail / Train	Traveling with Friends	0	2–3 Days	Moderately Concerned	No	1	0	0	0	0	0	0	0	0	0	0	1	0	1	0	0	0	0	0	0	0	1	57	Acceptable	Enumerator 1
NC2025-0124	Valid Samples	2025-08-04	Nanchang West Railway Station	Male	25–34years	Bachelor's degree	Visitors from Other Cities in Jiangxi Province	High-Speed Rail / Train	Traveling with Family/Children	0	1 Day	Neutral	Yes	1	1	0	0	0	1	0	0	0	1	1	0	0	1	0	1	0	0	0	1	0	0	58	Acceptable	Enumerator 1
NC2025-0125	Valid Samples	2025-08-01	Nanchang Railway Station	Female	35–44years	Master's degree or above	Visitors from Other Provinces in China	High-Speed Rail / Train	Traveling with Family/Children	1	2–3 Days	Moderately Concerned	No	0	0	0	0	0	0	0	0	0	1	0	1	1	0	0	0	0	0	0	0	0	1	47	Marginal	Enumerator 4
NC2025-0126	Valid Samples	2025-08-13	Nanchang East Railway Station	Female	18–24years	High school or below	Local Visitors from Nanchang	High-Speed Rail / Train	Traveling with Family/Children	0	1 Day	Moderately Concerned	No	1	1	0	0	0	0	0	0	0	0	0	0	1	1	1	0	0	0	0	0	0	1	66	Good	Enumerator 2
NC2025-0127	Valid Samples	2025-08-18	Nanchang Railway Station	Female	25–34years	Associate degree	Visitors from Other Provinces in China	Private Car	Traveling with Friends	1	Less than Half a Day	Neutral	No	0	1	0	0	0	0	0	0	0	1	1	0	0	1	0	0	0	0	0	0	0	1	63	Good	Enumerator 2
NC2025-0128	Valid Samples	2025-08-20	Nanchang South Railway Station	Female	25–34years	Master's degree or above	Visitors from Other Provinces in China	High-Speed Rail / Train	Traveling with Friends	0	2–3 Days	Neutral	Yes	0	0	1	0	1	1	0	0	0	1	1	0	1	0	1	0	0	0	0	0	0	0	78	Very good	Enumerator 3
NC2025-0129	Valid Samples	2025-08-29	Nanchang Railway Station	Female	25–34years	Associate degree	Visitors from Other Provinces in China	High-Speed Rail / Train	Traveling with Family/Children	0	2–3 Days	Neutral	No	0	1	1	0	1	0	0	0	0	0	0	1	0	0	0	0	0	0	0	0	0	1	61	Good	Enumerator 4
NC2025-0130	Valid Samples	2025-08-18	Nanchang Railway Station	Female	25–34years	Bachelor's degree	Visitors from Other Cities in Jiangxi Province	High-Speed Rail / Train	Traveling with Family/Children	0	2–3 Days	Neutral	Yes	1	1	0	1	0	1	0	0	1	0	1	1	0	0	0	0	0	0	0	0	0	0	89	Excellent	Enumerator 2
NC2025-0131	Valid Samples	2025-08-29	Nanchang South Railway Station	Male	18–24years	Bachelor's degree	Visitors from Other Cities in Jiangxi Province	High-Speed Rail / Train	Traveling with Friends	0	2–3 Days	Neutral	Yes	1	0	1	1	0	0	0	0	0	1	0	1	0	0	0	0	0	1	1	0	0	0	62	Good	Enumerator 1
NC2025-0132	Valid Samples	2025-08-19	Nanchang West Railway Station	Female	18–24years	Bachelor's degree	Visitors from Other Cities in Jiangxi Province	High-Speed Rail / Train	Traveling with Friends	0	1 Day	Neutral	Yes	1	0	1	0	1	0	0	0	0	0	0	0	1	0	0	0	0	0	0	0	0	0	51	Acceptable	Enumerator 4
NC2025-0133	Valid Samples	2025-08-26	Nanchang East Railway Station	Male	25–34years	Bachelor's degree	Visitors from Other Cities in Jiangxi Province	Private Car	Traveling with Friends	1	4–7 Days	Neutral	No	1	0	1	1	0	0	0	0	1	0	0	0	1	0	0	0	0	0	0	0	0	1	74	Very good	Enumerator 1
NC2025-0134	Valid Samples	2025-07-28	Nanchang Changbei International Airport	Female	25–34years	Bachelor's degree	Visitors from Other Provinces in China	Private Car	Traveling with Friends	0	1 Day	Not Concerned at All	No	1	0	0	0	0	0	0	0	0	1	1	0	0	1	0	0	0	0	0	0	0	1	78	Very good	Enumerator 3
NC2025-0135	Valid Samples	2025-08-29	Nanchang West Railway Station	Female	35–44years	Bachelor's degree	Visitors from Other Provinces in China	High-Speed Rail / Train	Traveling with Family/Children	0	2–3 Days	Neutral	Yes	0	1	0	1	1	0	0	0	0	0	1	0	0	0	0	0	0	1	1	0	0	0	72	Very good	Enumerator 1
NC2025-0136	Valid Samples	2025-08-22	Nanchang Railway Station	Female	18–24years	Associate degree	Local Visitors from Nanchang	High-Speed Rail / Train	Traveling Alone	0	2–3 Days	Very Concerned	Yes	1	1	0	0	0	1	0	0	0	1	0	0	0	0	0	1	1	0	1	0	1	0	72	Very good	Enumerator 1
NC2025-0137	Valid Samples	2025-08-14	Nanchang Changbei International Airport	Female	45–59years	High school or below	Visitors from Other Provinces in China	Airplane	Traveling with Friends	0	Less than Half a Day	Neutral	No	1	1	0	1	0	0	0	0	0	1	1	0	1	0	0	0	0	0	0	0	0	1	72	Very good	Enumerator 2
NC2025-0138	Valid Samples	2025-08-17	Nanchang West Railway Station	Female	18–24years	Master's degree or above	Visitors from Other Provinces in China	High-Speed Rail / Train	Traveling with Friends	0	2–3 Days	Very Concerned	Yes	1	1	0	0	1	0	0	0	0	1	0	1	0	0	0	1	0	0	0	0	1	0	72	Very good	Enumerator 1
NC2025-0139	Valid Samples	2025-07-29	Nanchang Railway Station	Male	18–24years	High school or below	Visitors from Other Cities in Jiangxi Province	High-Speed Rail / Train	Traveling with Partner	1	1 Day	Slightly Concerned	Yes	0	0	0	1	1	1	0	0	0	1	0	1	0	1	0	0	0	0	1	0	0	0	65	Good	Enumerator 3
NC2025-0140	Valid Samples	2025-08-05	Nanchang South Railway Station	Female	≥60years	Associate degree	Local Visitors from Nanchang	High-Speed Rail / Train	Traveling with Partner	0	2–3 Days	Neutral	No	0	1	0	1	1	1	0	0	0	0	0	0	0	0	1	0	0	0	0	0	0	1	48	Marginal	Enumerator 3
NC2025-0141	Valid Samples	2025-08-19	Nanchang South Railway Station	Male	18–24years	Master's degree or above	Visitors from Other Provinces in China	High-Speed Rail / Train	Traveling with Partner	2	2–3 Days	Neutral	Yes	0	0	1	0	1	1	1	0	0	0	1	1	0	0	0	0	0	0	0	0	1	0	75	Very good	Enumerator 2
NC2025-0142	Valid Samples	2025-07-23	Nanchang West Railway Station	Female	25–34years	High school or below	Visitors from Other Cities in Jiangxi Province	High-Speed Rail / Train	Traveling Alone	0	1 Day	Not Concerned at All	No	1	0	1	1	1	1	0	0	0	1	0	1	0	0	0	1	0	0	0	0	0	1	74	Very good	Enumerator 1
NC2025-0143	Valid Samples	2025-07-03	Nanchang Changbei International Airport	Female	18–24years	Bachelor's degree	Visitors from Other Provinces in China	Airplane	Traveling with Family/Children	1	2–3 Days	Neutral	No	1	0	0	1	0	1	0	1	0	1	0	1	1	0	0	0	0	0	0	0	0	1	65	Good	Enumerator 2
NC2025-0144	Valid Samples	2025-08-04	Nanchang West Railway Station	Male	25–34years	Master's degree or above	Visitors from Other Provinces in China	High-Speed Rail / Train	Traveling with Friends	0	4–7 Days	Very Concerned	Yes	0	0	0	0	0	0	0	0	0	1	0	1	1	0	0	1	0	1	0	0	0	0	63	Good	Enumerator 4
NC2025-0145	Valid Samples	2025-07-10	Nanchang Changbei International Airport	Male	35–44years	Bachelor's degree	Visitors from Other Provinces in China	Airplane	Traveling Alone	0	Less than Half a Day	Moderately Concerned	No	1	1	0	0	0	0	0	0	0	0	1	0	1	0	0	0	0	0	0	0	0	1	80	Excellent	Enumerator 3
NC2025-0146	Valid Samples	2025-08-04	Nanchang East Railway Station	Male	35–44years	High school or below	Visitors from Other Provinces in China	Private Car	Traveling Alone	0	1 Day	Moderately Concerned	Yes	1	0	0	0	0	0	0	0	0	0	1	0	0	0	0	0	0	0	0	0	0	0	66	Good	Enumerator 1
NC2025-0147	Valid Samples	2025-08-17	Nanchang West Railway Station	Female	25–34years	Bachelor's degree	Visitors from Other Provinces in China	Private Car	Traveling with Friends	0	2–3 Days	Neutral	No	1	0	1	0	0	0	0	0	0	1	0	1	0	0	1	0	0	0	0	0	0	1	70	Very good	Enumerator 1
NC2025-0148	Valid Samples	2025-08-22	Nanchang West Railway Station	Female	25–34years	Associate degree	Visitors from Other Provinces in China	Local Public Transportation	Traveling with Family/Children	0	4–7 Days	Moderately Concerned	Yes	1	1	1	1	0	0	0	0	0	0	0	1	0	1	1	1	0	0	0	0	0	0	45	Marginal	Enumerator 3
NC2025-0149	Valid Samples	2025-07-12	Nanchang Changbei International Airport	Female	18–24years	Master's degree or above	Visitors from Other Cities in Jiangxi Province	Airplane	Traveling with Partner	0	1 Day	Moderately Concerned	No	1	0	0	0	0	0	1	0	0	0	1	1	0	1	1	0	0	0	0	0	0	1	58	Acceptable	Enumerator 4
NC2025-0150	Valid Samples	2025-08-16	Nanchang South Railway Station	Male	25–34years	Bachelor's degree	Visitors from Other Provinces in China	High-Speed Rail / Train	Traveling Alone	1	4–7 Days	Very Concerned	No	0	0	1	0	0	0	0	0	0	1	1	1	1	0	0	0	0	0	0	0	0	1	59	Acceptable	Enumerator 2
NC2025-0151	Valid Samples	2025-07-18	Nanchang East Railway Station	Female	25–34years	High school or below	Visitors from Other Provinces in China	High-Speed Rail / Train	Traveling with Partner	0	1 Day	Moderately Concerned	Yes	1	0	1	0	0	1	0	0	0	0	0	1	1	0	0	0	0	0	0	0	0	0	74	Very good	Enumerator 2
NC2025-0152	Valid Samples	2025-08-19	Nanchang Changbei International Airport	Male	45–59years	Master's degree or above	Visitors from Other Provinces in China	Airplane	Traveling with Friends	0	1 Day	Moderately Concerned	No	1	0	0	1	1	0	0	0	0	1	0	1	1	0	0	0	0	0	0	0	0	1	74	Very good	Enumerator 1
NC2025-0153	Valid Samples	2025-07-26	Nanchang Railway Station	Female	18–24years	High school or below	Visitors from Other Cities in Jiangxi Province	High-Speed Rail / Train	Traveling Alone	0	1 Day	Moderately Concerned	Yes	1	1	1	0	1	1	1	0	0	0	1	0	0	0	0	1	1	0	0	1	0	0	56	Acceptable	Enumerator 1
NC2025-0154	Valid Samples	2025-07-28	Nanchang Railway Station	Male	18–24years	Associate degree	Visitors from Other Provinces in China	Local Public Transportation	Traveling with Family/Children	0	2–3 Days	Very Concerned	Yes	1	1	0	0	0	1	0	1	0	0	1	0	1	0	1	0	0	1	1	0	0	0	51	Acceptable	Enumerator 4
NC2025-0155	Valid Samples	2025-07-08	Nanchang East Railway Station	Female	25–34years	Bachelor's degree	Visitors from Other Provinces in China	Private Car	Traveling with Family/Children	0	Less than Half a Day	Neutral	No	0	1	0	0	1	0	0	0	0	0	1	0	0	0	0	0	0	0	0	0	0	1	49	Marginal	Enumerator 2
NC2025-0156	Valid Samples	2025-08-14	Nanchang East Railway Station	Male	18–24years	Bachelor's degree	Visitors from Other Cities in Jiangxi Province	High-Speed Rail / Train	Group Tour	0	1 Day	Neutral	Yes	0	1	0	0	0	0	1	0	0	1	0	1	1	0	0	0	0	0	0	1	0	0	53	Acceptable	Enumerator 4
NC2025-0157	Valid Samples	2025-07-29	Nanchang Changbei International Airport	Male	45–59years	Master's degree or above	Visitors from Other Cities in Jiangxi Province	Other	Traveling with Friends	0	4–7 Days	Very Concerned	Yes	1	0	0	0	0	0	0	0	0	1	1	1	1	1	0	0	1	0	0	0	0	0	52	Acceptable	Enumerator 4
NC2025-0158	Valid Samples	2025-06-30	Nanchang South Railway Station	Female	18–24years	Master's degree or above	Visitors from Other Provinces in China	High-Speed Rail / Train	Traveling with Partner	0	Less than Half a Day	Slightly Concerned	No	1	0	1	0	0	0	0	0	0	0	0	0	0	0	0	0	0	0	0	0	0	1	82	Excellent	Enumerator 3
NC2025-0159	Valid Samples	2025-07-18	Nanchang Railway Station	Male	18–24years	Bachelor's degree	Visitors from Other Cities in Jiangxi Province	Private Car	Group Tour	0	Less than Half a Day	Very Concerned	No	1	0	1	0	1	0	0	0	0	0	0	1	0	0	0	0	0	0	0	0	0	1	69	Good	Enumerator 1
NC2025-0160	Valid Samples	2025-08-17	Nanchang Railway Station	Male	35–44years	Bachelor's degree	Visitors from Other Provinces in China	Local Public Transportation	Traveling with Family/Children	0	2–3 Days	Not Concerned at All	No	1	0	1	0	1	1	0	0	0	1	1	1	1	0	0	0	0	0	0	0	0	1	50	Acceptable	Enumerator 2
NC2025-0161	Valid Samples	2025-08-22	Nanchang Railway Station	Male	45–59years	Bachelor's degree	Local Visitors from Nanchang	Long-Distance Bus	Traveling with Family/Children	1	2–3 Days	Slightly Concerned	Yes	0	1	1	1	0	0	1	0	0	0	0	0	0	0	0	1	0	0	0	0	0	0	67	Good	Enumerator 1
NC2025-0163	Valid Samples	2025-07-03	Nanchang East Railway Station	Male	18–24years	Bachelor's degree	Visitors from Other Cities in Jiangxi Province	Private Car	Traveling with Partner	0	More than 7 Days	Very Concerned	Yes	1	0	1	1	0	0	0	0	0	0	0	1	0	0	0	0	0	0	0	0	0	0	63	Good	Enumerator 1
NC2025-0164	Valid Samples	2025-08-16	Nanchang West Railway Station	Male	25–34years	High school or below	Visitors from Other Provinces in China	High-Speed Rail / Train	Traveling with Friends	1	2–3 Days	Very Concerned	Yes	1	0	1	1	1	1	0	0	0	0	1	1	0	0	0	0	1	1	0	0	0	0	52	Acceptable	Enumerator 3
NC2025-0165	Valid Samples	2025-08-28	Nanchang South Railway Station	Other / Prefer not to say	18–24years	Associate degree	Visitors from Other Cities in Jiangxi Province	High-Speed Rail / Train	Traveling with Friends	0	1 Day	Moderately Concerned	Yes	0	0	1	0	0	0	0	1	0	1	0	0	1	0	1	1	1	0	0	0	0	0	59	Acceptable	Enumerator 4
NC2025-0166	Valid Samples	2025-08-20	Nanchang West Railway Station	Female	25–34years	Bachelor's degree	Visitors from Other Cities in Jiangxi Province	Private Car	Traveling with Family/Children	2	2–3 Days	Neutral	Yes	1	1	0	0	0	0	0	0	0	0	0	0	0	0	0	0	0	0	1	0	0	0	66	Good	Enumerator 4
NC2025-0167	Valid Samples	2025-08-17	Nanchang West Railway Station	Female	25–34years	Associate degree	Visitors from Other Provinces in China	Long-Distance Bus	Traveling with Family/Children	0	1 Day	Moderately Concerned	Yes	1	0	0	1	0	1	1	0	0	0	0	0	1	0	0	0	0	0	1	0	0	0	48	Marginal	Enumerator 4
NC2025-0168	Valid Samples	2025-08-28	Nanchang Changbei International Airport	Female	18–24years	Bachelor's degree	Visitors from Other Provinces in China	Airplane	Traveling with Partner	0	2–3 Days	Very Concerned	Yes	0	0	1	0	1	0	0	0	0	0	0	1	1	0	0	0	0	0	0	0	0	0	70	Very good	Enumerator 2
NC2025-0169	Valid Samples	2025-06-30	Nanchang East Railway Station	Female	18–24years	Bachelor's degree	Visitors from Other Cities in Jiangxi Province	Private Car	Traveling with Friends	1	1 Day	Moderately Concerned	No	1	1	0	0	1	0	0	0	0	1	0	0	0	0	0	0	0	0	0	0	0	1	54	Acceptable	Enumerator 1
NC2025-0170	Valid Samples	2025-07-14	Nanchang Changbei International Airport	Male	18–24years	Bachelor's degree	Visitors from Other Cities in Jiangxi Province	Airplane	Group Tour	0	1 Day	Very Concerned	Yes	0	0	1	1	0	1	1	0	0	1	0	0	1	1	0	0	1	0	1	1	0	0	79	Very good	Enumerator 3
NC2025-0171	Valid Samples	2025-07-08	Nanchang West Railway Station	Female	35–44years	Associate degree	Visitors from Other Provinces in China	Private Car	Traveling with Friends	0	4–7 Days	Slightly Concerned	Yes	1	1	0	1	0	0	0	0	0	1	1	0	1	0	1	0	1	0	0	0	0	0	63	Good	Enumerator 3
NC2025-0172	Valid Samples	2025-08-30	Nanchang Railway Station	Male	18–24years	Associate degree	Visitors from Other Cities in Jiangxi Province	Private Car	Traveling Alone	0	Less than Half a Day	Very Concerned	Yes	0	1	0	1	0	0	0	0	0	0	1	1	0	0	0	0	1	0	0	0	0	0	67	Good	Enumerator 2
NC2025-0173	Valid Samples	2025-08-20	Nanchang East Railway Station	Male	25–34years	Bachelor's degree	Visitors from Other Provinces in China	High-Speed Rail / Train	Traveling with Family/Children	0	2–3 Days	Moderately Concerned	Yes	1	1	1	1	0	0	0	0	0	0	0	0	1	1	1	0	0	1	0	0	0	0	73	Very good	Enumerator 1
NC2025-0174	Valid Samples	2025-06-30	Nanchang South Railway Station	Male	35–44years	Associate degree	Visitors from Other Provinces in China	High-Speed Rail / Train	Traveling with Family/Children	0	1 Day	Moderately Concerned	Yes	1	1	1	1	1	1	1	0	0	0	1	1	0	1	0	1	0	0	0	1	0	0	47	Marginal	Enumerator 4
NC2025-0175	Valid Samples	2025-08-12	Nanchang East Railway Station	Male	18–24years	High school or below	Visitors from Other Provinces in China	High-Speed Rail / Train	Traveling with Family/Children	0	2–3 Days	Very Concerned	No	0	1	0	0	0	1	0	0	0	1	1	0	1	0	0	1	0	0	0	0	0	1	68	Good	Enumerator 2
NC2025-0176	Valid Samples	2025-08-27	Nanchang Changbei International Airport	Female	35–44years	Master's degree or above	Visitors from Other Cities in Jiangxi Province	Airplane	Traveling with Family/Children	0	Less than Half a Day	Very Concerned	No	0	1	0	0	0	1	0	0	0	0	0	1	1	0	0	0	0	0	0	0	0	1	71	Very good	Enumerator 1
NC2025-0177	Valid Samples	2025-07-20	Nanchang East Railway Station	Female	35–44years	High school or below	Visitors from Other Provinces in China	Private Car	Traveling with Family/Children	0	2–3 Days	Slightly Concerned	No	1	0	1	1	0	0	0	0	0	0	0	0	0	1	1	0	0	0	0	0	0	1	81	Excellent	Enumerator 3
NC2025-0178	Valid Samples	2025-07-04	Nanchang Railway Station	Male	45–59years	High school or below	Local Visitors from Nanchang	Private Car	Traveling with Family/Children	1	1 Day	Neutral	No	0	0	0	0	0	0	1	0	0	0	0	1	1	0	0	0	0	0	0	0	0	1	58	Acceptable	Enumerator 1
NC2025-0179	Valid Samples	2025-08-13	Nanchang South Railway Station	Female	18–24years	Associate degree	Local Visitors from Nanchang	High-Speed Rail / Train	Traveling with Partner	1	2–3 Days	Moderately Concerned	Yes	0	0	0	0	0	1	0	0	0	0	1	1	1	0	0	0	0	0	0	0	0	0	54	Acceptable	Enumerator 4
NC2025-0180	Valid Samples	2025-07-15	Nanchang Changbei International Airport	Female	18–24years	Associate degree	Visitors from Other Cities in Jiangxi Province	Airplane	Traveling Alone	0	4–7 Days	Moderately Concerned	Yes	1	1	0	0	0	1	0	0	0	1	0	1	0	0	0	1	0	0	0	0	0	0	61	Good	Enumerator 4
NC2025-0181	Valid Samples	2025-08-02	Nanchang West Railway Station	Female	18–24years	High school or below	Local Visitors from Nanchang	Long-Distance Bus	Traveling with Family/Children	0	1 Day	Very Concerned	Yes	1	1	0	0	0	0	0	1	0	1	0	0	1	0	0	1	0	1	0	0	1	0	64	Good	Enumerator 1
NC2025-0182	Valid Samples	2025-08-13	Nanchang Railway Station	Female	35–44years	Bachelor's degree	Visitors from Other Cities in Jiangxi Province	Private Car	Traveling Alone	0	Less than Half a Day	Moderately Concerned	No	1	1	1	0	0	0	1	0	0	0	0	0	0	0	0	0	0	0	0	0	0	1	68	Good	Enumerator 4
NC2025-0183	Valid Samples	2025-07-12	Nanchang West Railway Station	Female	35–44years	Associate degree	Visitors from Other Provinces in China	High-Speed Rail / Train	Traveling with Partner	0	More than 7 Days	Moderately Concerned	Yes	0	1	0	0	0	0	0	0	0	1	0	0	1	0	0	0	0	0	1	0	0	0	68	Good	Enumerator 4
NC2025-0184	Valid Samples	2025-08-10	Nanchang East Railway Station	Female	25–34years	Master's degree or above	Visitors from Other Provinces in China	High-Speed Rail / Train	Traveling with Friends	1	2–3 Days	Neutral	No	1	0	1	0	1	1	0	1	0	0	0	1	1	0	0	1	0	0	0	0	0	1	81	Excellent	Enumerator 2
NC2025-0185	Valid Samples	2025-08-21	Nanchang West Railway Station	Female	25–34years	Associate degree	Visitors from Other Provinces in China	High-Speed Rail / Train	Traveling with Partner	0	4–7 Days	Neutral	Yes	1	0	0	1	1	1	0	0	0	1	0	0	0	0	0	0	0	1	1	0	0	0	83	Excellent	Enumerator 2
NC2025-0186	Valid Samples	2025-08-02	Nanchang Changbei International Airport	Male	18–24years	Associate degree	Visitors from Other Provinces in China	Private Car	Traveling with Friends	0	2–3 Days	Moderately Concerned	No	1	0	1	0	0	1	1	0	0	1	0	1	1	0	0	0	0	0	0	0	0	1	58	Acceptable	Enumerator 4
NC2025-0187	Valid Samples	2025-07-19	Nanchang West Railway Station	Female	35–44years	Bachelor's degree	Visitors from Other Provinces in China	High-Speed Rail / Train	Traveling with Family/Children	0	2–3 Days	Moderately Concerned	No	0	0	1	1	0	0	0	0	0	1	1	1	0	0	0	0	0	0	0	0	0	1	80	Excellent	Enumerator 3
NC2025-0188	Valid Samples	2025-07-05	Nanchang East Railway Station	Male	35–44years	Associate degree	Visitors from Other Provinces in China	High-Speed Rail / Train	Traveling with Family/Children	2	1 Day	Neutral	Yes	1	1	0	0	0	0	0	0	0	1	0	0	0	0	0	1	0	1	0	0	0	0	74	Very good	Enumerator 2
NC2025-0189	Valid Samples	2025-08-05	Nanchang Railway Station	Female	45–59years	Associate degree	Visitors from Other Provinces in China	Private Car	Traveling with Friends	0	4–7 Days	Very Concerned	Yes	1	1	0	0	1	1	0	0	0	1	0	0	0	1	0	1	0	0	0	0	0	0	76	Very good	Enumerator 3
NC2025-0191	Valid Samples	2025-07-11	Nanchang West Railway Station	Male	35–44years	Master's degree or above	Visitors from Other Cities in Jiangxi Province	High-Speed Rail / Train	Traveling with Friends	1	1 Day	Slightly Concerned	Yes	0	0	0	1	0	1	0	0	0	0	0	1	1	0	0	0	1	1	0	1	0	0	48	Marginal	Enumerator 3
NC2025-0192	Valid Samples	2025-07-18	Nanchang Railway Station	Male	18–24years	Master's degree or above	Visitors from Other Provinces in China	High-Speed Rail / Train	Traveling with Friends	1	2–3 Days	Neutral	Yes	1	0	1	0	0	0	0	0	0	1	1	0	1	1	0	1	0	0	0	0	0	0	80	Excellent	Enumerator 3
NC2025-0193	Valid Samples	2025-06-30	Nanchang East Railway Station	Male	18–24years	Associate degree	Visitors from Other Provinces in China	High-Speed Rail / Train	Traveling with Family/Children	0	Less than Half a Day	Moderately Concerned	Yes	0	1	1	1	0	0	0	0	0	0	0	0	0	0	0	0	0	0	0	0	0	0	47	Marginal	Enumerator 2
NC2025-0194	Valid Samples	2025-08-18	Nanchang Railway Station	Male	45–59years	Bachelor's degree	Visitors from Other Provinces in China	High-Speed Rail / Train	Traveling Alone	0	2–3 Days	Neutral	No	1	1	0	0	0	0	0	0	0	0	1	0	1	1	0	0	0	0	0	0	0	1	78	Very good	Enumerator 1
NC2025-0195	Valid Samples	2025-07-06	Nanchang South Railway Station	Male	35–44years	Master's degree or above	Visitors from Hong Kong, Macao, Taiwan, and Overseas	High-Speed Rail / Train	Traveling Alone	0	1 Day	Moderately Concerned	No	0	0	1	1	0	1	0	0	0	0	1	1	1	0	0	1	0	0	0	0	0	1	55	Acceptable	Enumerator 2
NC2025-0196	Valid Samples	2025-08-30	Nanchang West Railway Station	Male	18–24years	Associate degree	Visitors from Other Cities in Jiangxi Province	High-Speed Rail / Train	Traveling with Family/Children	0	1 Day	Moderately Concerned	Yes	0	0	0	1	0	0	0	0	0	1	1	0	1	0	0	0	0	0	1	0	0	0	53	Acceptable	Enumerator 2
NC2025-0197	Valid Samples	2025-08-29	Nanchang Railway Station	Female	25–34years	Bachelor's degree	Visitors from Other Provinces in China	Private Car	Traveling with Family/Children	0	4–7 Days	Moderately Concerned	No	0	1	1	0	0	0	1	0	0	1	0	0	0	0	0	0	0	0	0	0	0	1	57	Acceptable	Enumerator 1
NC2025-0198	Valid Samples	2025-07-10	Nanchang Railway Station	Male	45–59years	High school or below	Visitors from Other Cities in Jiangxi Province	Private Car	Traveling with Family/Children	0	2–3 Days	Very Concerned	No	0	1	0	0	1	1	0	0	0	0	0	1	0	0	0	1	0	0	0	0	0	1	70	Very good	Enumerator 2
NC2025-0199	Valid Samples	2025-08-25	Nanchang Changbei International Airport	Male	45–59years	Bachelor's degree	Visitors from Other Provinces in China	Private Car	Traveling with Family/Children	0	2–3 Days	Neutral	Yes	1	0	0	1	0	0	0	0	0	1	0	0	1	0	1	1	0	0	1	1	0	0	49	Marginal	Enumerator 4
NC2025-0200	Valid Samples	2025-07-19	Nanchang Railway Station	Female	45–59years	Associate degree	Visitors from Other Provinces in China	High-Speed Rail / Train	Group Tour	2	2–3 Days	Moderately Concerned	Yes	1	1	1	0	1	0	0	0	0	1	1	1	0	1	0	0	1	0	0	0	0	0	84	Excellent	Enumerator 2
NC2025-0201	Valid Samples	2025-08-15	Nanchang Changbei International Airport	Female	35–44years	Bachelor's degree	Visitors from Other Cities in Jiangxi Province	Private Car	Traveling with Friends	0	Less than Half a Day	Neutral	Yes	1	1	0	0	0	1	0	0	0	1	0	1	0	0	0	0	0	0	0	0	0	0	52	Acceptable	Enumerator 1
NC2025-0202	Valid Samples	2025-07-02	Nanchang West Railway Station	Other / Prefer not to say	25–34years	Associate degree	Visitors from Other Provinces in China	High-Speed Rail / Train	Traveling with Friends	0	2–3 Days	Neutral	No	1	1	0	1	0	0	0	0	0	1	1	1	0	0	0	0	0	0	0	0	0	1	85	Excellent	Enumerator 2
NC2025-0203	Valid Samples	2025-08-28	Nanchang Changbei International Airport	Male	25–34years	Master's degree or above	Visitors from Other Provinces in China	Private Car	Traveling with Friends	2	4–7 Days	Neutral	No	1	1	1	0	0	0	1	0	0	0	0	1	0	1	0	1	0	0	0	0	0	1	92	Ideal	Enumerator 2
NC2025-0204	Valid Samples	2025-08-24	Nanchang East Railway Station	Female	35–44years	Master's degree or above	Visitors from Other Provinces in China	High-Speed Rail / Train	Traveling with Friends	1	1 Day	Slightly Concerned	No	1	0	1	0	1	1	0	0	0	1	0	0	0	0	1	0	0	0	0	0	0	1	72	Very good	Enumerator 1
NC2025-0205	Valid Samples	2025-07-29	Nanchang Changbei International Airport	Male	25–34years	High school or below	Visitors from Other Cities in Jiangxi Province	Airplane	Traveling with Family/Children	0	4–7 Days	Very Concerned	No	1	1	0	0	1	0	1	0	0	0	1	1	0	0	0	0	0	0	0	0	0	1	68	Good	Enumerator 2
NC2025-0206	Valid Samples	2025-08-06	Nanchang East Railway Station	Female	18–24years	Bachelor's degree	Visitors from Other Cities in Jiangxi Province	High-Speed Rail / Train	Traveling with Friends	3	Less than Half a Day	Moderately Concerned	Yes	0	0	1	1	0	0	0	0	0	0	0	0	1	0	0	0	0	0	0	0	0	0	56	Acceptable	Enumerator 2
NC2025-0207	Valid Samples	2025-08-14	Nanchang East Railway Station	Female	45–59years	High school or below	Visitors from Other Cities in Jiangxi Province	High-Speed Rail / Train	Traveling with Family/Children	0	Less than Half a Day	Moderately Concerned	No	0	0	1	0	1	0	0	0	0	1	0	1	0	0	0	0	0	0	0	0	0	1	59	Acceptable	Enumerator 1
NC2025-0208	Valid Samples	2025-08-30	Nanchang Railway Station	Female	35–44years	Bachelor's degree	Visitors from Other Cities in Jiangxi Province	Private Car	Traveling with Family/Children	0	2–3 Days	Moderately Concerned	Yes	1	0	0	1	1	0	0	0	0	0	0	1	1	0	1	0	0	0	0	0	0	0	83	Excellent	Enumerator 1
NC2025-0209	Valid Samples	2025-08-06	Nanchang West Railway Station	Female	25–34years	Master's degree or above	Visitors from Other Provinces in China	High-Speed Rail / Train	Traveling with Family/Children	2	2–3 Days	Moderately Concerned	Yes	1	0	1	0	0	1	0	0	0	0	1	1	1	0	0	0	0	1	0	0	0	0	63	Good	Enumerator 1
NC2025-0210	Valid Samples	2025-07-20	Nanchang Changbei International Airport	Male	18–24years	Associate degree	Visitors from Other Provinces in China	Airplane	Traveling with Friends	1	1 Day	Moderately Concerned	No	1	1	1	0	1	0	1	0	0	0	0	0	1	1	1	1	0	0	0	0	0	1	71	Very good	Enumerator 4
NC2025-0211	Valid Samples	2025-07-28	Nanchang South Railway Station	Male	18–24years	High school or below	Visitors from Other Cities in Jiangxi Province	High-Speed Rail / Train	Traveling with Partner	0	2–3 Days	Slightly Concerned	No	1	1	0	1	0	1	0	0	0	1	0	0	1	0	1	0	0	0	0	0	0	1	56	Acceptable	Enumerator 3
NC2025-0212	Valid Samples	2025-08-09	Nanchang West Railway Station	Female	45–59years	High school or below	Visitors from Other Cities in Jiangxi Province	High-Speed Rail / Train	Traveling with Friends	0	2–3 Days	Moderately Concerned	Yes	0	1	0	0	1	0	0	0	0	0	1	1	1	0	1	0	0	1	0	1	0	0	68	Good	Enumerator 2
NC2025-0213	Valid Samples	2025-07-21	Nanchang West Railway Station	Female	25–34years	Bachelor's degree	Visitors from Other Provinces in China	High-Speed Rail / Train	Traveling with Family/Children	0	More than 7 Days	Slightly Concerned	Yes	1	0	0	0	1	0	0	0	0	0	0	1	1	0	0	0	0	0	0	0	0	0	80	Excellent	Enumerator 3
NC2025-0214	Valid Samples	2025-08-29	Nanchang West Railway Station	Male	25–34years	High school or below	Local Visitors from Nanchang	High-Speed Rail / Train	Traveling with Family/Children	0	1 Day	Moderately Concerned	No	1	1	0	1	1	1	0	1	0	1	0	1	0	0	0	0	0	0	0	0	0	1	78	Very good	Enumerator 1
NC2025-0215	Valid Samples	2025-08-29	Nanchang East Railway Station	Female	25–34years	Bachelor's degree	Local Visitors from Nanchang	High-Speed Rail / Train	Traveling with Friends	0	2–3 Days	Neutral	No	0	0	0	0	1	0	0	0	0	1	0	0	0	1	0	0	0	0	0	0	0	1	54	Acceptable	Enumerator 3
NC2025-0216	Valid Samples	2025-07-05	Nanchang Changbei International Airport	Male	≥60years	Associate degree	Visitors from Other Cities in Jiangxi Province	Airplane	Traveling with Friends	0	1 Day	Moderately Concerned	Yes	0	0	0	0	0	1	0	0	0	0	0	0	0	0	0	0	0	0	0	0	0	0	49	Marginal	Enumerator 2
NC2025-0217	Valid Samples	2025-08-11	Nanchang South Railway Station	Female	35–44years	Bachelor's degree	Visitors from Other Cities in Jiangxi Province	High-Speed Rail / Train	Traveling with Family/Children	0	2–3 Days	Slightly Concerned	Yes	1	1	0	0	1	1	0	0	0	1	1	1	1	0	0	0	0	1	0	0	1	0	68	Good	Enumerator 4
NC2025-0219	Valid Samples	2025-07-06	Nanchang West Railway Station	Male	25–34years	Bachelor's degree	Visitors from Other Provinces in China	High-Speed Rail / Train	Traveling with Friends	0	2–3 Days	Very Concerned	No	1	1	1	0	0	1	0	0	0	0	0	0	0	0	0	0	0	0	0	0	0	1	68	Good	Enumerator 3
NC2025-0220	Valid Samples	2025-08-29	Nanchang Changbei International Airport	Male	35–44years	Bachelor's degree	Local Visitors from Nanchang	Private Car	Traveling with Friends	0	1 Day	Moderately Concerned	No	0	1	1	0	0	1	0	0	0	1	0	0	0	0	0	0	0	0	0	0	0	1	74	Very good	Enumerator 2
NC2025-0221	Valid Samples	2025-08-16	Nanchang West Railway Station	Male	45–59years	Bachelor's degree	Visitors from Other Provinces in China	High-Speed Rail / Train	Traveling with Friends	0	1 Day	Moderately Concerned	Yes	0	1	1	0	0	0	0	0	0	0	1	0	0	0	0	0	1	1	0	0	0	0	83	Excellent	Enumerator 4
NC2025-0222	Valid Samples	2025-08-08	Nanchang Railway Station	Female	25–34years	Master's degree or above	Visitors from Other Provinces in China	Long-Distance Bus	Traveling Alone	1	2–3 Days	Moderately Concerned	No	0	0	0	0	0	1	0	0	0	0	0	1	1	1	0	0	0	0	0	0	0	1	73	Very good	Enumerator 4
NC2025-0223	Valid Samples	2025-07-22	Nanchang South Railway Station	Female	18–24years	Associate degree	Visitors from Other Provinces in China	High-Speed Rail / Train	Traveling Alone	0	4–7 Days	Moderately Concerned	No	1	1	1	1	0	0	0	0	0	1	0	0	0	0	0	0	0	0	0	0	0	1	49	Marginal	Enumerator 4
NC2025-0224	Valid Samples	2025-07-01	Nanchang Railway Station	Male	25–34years	Associate degree	Visitors from Other Cities in Jiangxi Province	High-Speed Rail / Train	Traveling with Family/Children	0	2–3 Days	Very Concerned	No	0	1	1	1	1	0	1	0	0	0	0	1	0	1	0	0	0	0	0	0	0	1	65	Good	Enumerator 2
NC2025-0225	Valid Samples	2025-07-07	Nanchang West Railway Station	Female	35–44years	Bachelor's degree	Local Visitors from Nanchang	High-Speed Rail / Train	Traveling with Friends	0	Less than Half a Day	Slightly Concerned	No	1	1	0	1	0	1	0	0	0	0	0	0	1	0	0	0	0	0	0	0	0	1	79	Very good	Enumerator 4
NC2025-0226	Valid Samples	2025-08-26	Nanchang Changbei International Airport	Male	18–24years	Bachelor's degree	Visitors from Other Cities in Jiangxi Province	Airplane	Traveling with Friends	0	1 Day	Very Concerned	No	0	0	0	0	0	1	1	0	0	1	0	1	1	0	0	0	0	0	0	0	0	1	67	Good	Enumerator 1
NC2025-0227	Valid Samples	2025-08-26	Nanchang Railway Station	Female	18–24years	Bachelor's degree	Visitors from Other Cities in Jiangxi Province	High-Speed Rail / Train	Traveling with Friends	0	Less than Half a Day	Neutral	Yes	1	0	1	1	0	1	0	0	0	0	1	0	1	0	0	0	1	0	0	0	0	0	73	Very good	Enumerator 4
NC2025-0228	Valid Samples	2025-07-10	Nanchang Railway Station	Female	18–24years	Associate degree	Visitors from Other Provinces in China	Private Car	Traveling with Friends	0	2–3 Days	Moderately Concerned	Yes	1	0	0	0	0	1	1	0	0	1	0	1	0	0	0	0	0	0	0	1	1	0	64	Good	Enumerator 2
NC2025-0229	Valid Samples	2025-08-12	Nanchang Changbei International Airport	Male	25–34years	Associate degree	Visitors from Other Cities in Jiangxi Province	Airplane	Traveling with Friends	1	1 Day	Moderately Concerned	Yes	1	0	1	0	0	0	0	0	0	1	0	1	1	0	0	0	1	0	0	0	0	0	65	Good	Enumerator 3
NC2025-0230	Valid Samples	2025-07-17	Nanchang South Railway Station	Female	≥60years	High school or below	Visitors from Other Cities in Jiangxi Province	High-Speed Rail / Train	Traveling with Friends	4	1 Day	Neutral	Yes	0	0	0	1	1	1	0	1	0	1	0	0	0	0	0	0	0	0	0	0	0	0	55	Acceptable	Enumerator 4
NC2025-0231	Valid Samples	2025-08-12	Nanchang Changbei International Airport	Male	18–24years	Bachelor's degree	Visitors from Other Cities in Jiangxi Province	Airplane	Traveling with Partner	0	2–3 Days	Moderately Concerned	No	1	0	0	1	0	0	1	0	0	0	1	1	1	0	0	0	0	0	0	0	0	1	76	Very good	Enumerator 3
NC2025-0232	Valid Samples	2025-08-30	Nanchang East Railway Station	Female	25–34years	Bachelor's degree	Visitors from Other Cities in Jiangxi Province	Private Car	Traveling with Family/Children	0	1 Day	Moderately Concerned	No	1	1	1	0	1	0	0	0	0	1	0	1	0	0	0	0	0	0	0	0	0	1	65	Good	Enumerator 1
NC2025-0233	Valid Samples	2025-07-09	Nanchang Changbei International Airport	Male	25–34years	Bachelor's degree	Visitors from Other Provinces in China	Airplane	Traveling with Friends	0	2–3 Days	Moderately Concerned	No	0	0	1	0	0	0	0	1	0	1	0	1	0	0	0	1	0	0	0	0	0	1	68	Good	Enumerator 2
NC2025-0234	Valid Samples	2025-07-07	Nanchang Changbei International Airport	Male	35–44years	High school or below	Visitors from Other Cities in Jiangxi Province	Airplane	Traveling with Friends	2	2–3 Days	Very Concerned	Yes	1	0	1	0	0	1	0	0	0	1	0	0	1	1	0	0	0	0	1	0	0	0	84	Excellent	Enumerator 1
NC2025-0235	Valid Samples	2025-08-24	Nanchang South Railway Station	Male	25–34years	High school or below	Visitors from Other Provinces in China	High-Speed Rail / Train	Traveling with Friends	0	1 Day	Moderately Concerned	Yes	1	1	0	1	0	1	0	0	0	0	0	1	0	0	0	1	0	1	0	1	0	0	62	Good	Enumerator 2
NC2025-0236	Valid Samples	2025-07-10	Nanchang Changbei International Airport	Male	45–59years	Master's degree or above	Visitors from Other Provinces in China	Private Car	Traveling with Partner	0	2–3 Days	Very Concerned	Yes	1	0	1	0	0	0	0	0	0	0	0	1	0	1	1	0	1	1	0	0	0	0	75	Very good	Enumerator 3
NC2025-0237	Valid Samples	2025-08-18	Nanchang East Railway Station	Male	18–24years	Bachelor's degree	Visitors from Other Cities in Jiangxi Province	Private Car	Traveling with Friends	0	2–3 Days	Very Concerned	Yes	0	0	1	1	0	0	0	0	0	1	0	0	1	1	0	0	0	0	0	0	0	0	60	Good	Enumerator 4
NC2025-0238	Valid Samples	2025-07-02	Nanchang West Railway Station	Male	18–24years	High school or below	Visitors from Other Provinces in China	High-Speed Rail / Train	Traveling Alone	0	2–3 Days	Moderately Concerned	Yes	0	0	0	1	0	1	1	0	0	0	0	1	0	0	0	0	0	0	0	0	0	0	70	Very good	Enumerator 4
NC2025-0239	Valid Samples	2025-07-15	Nanchang East Railway Station	Female	18–24years	Bachelor's degree	Local Visitors from Nanchang	High-Speed Rail / Train	Traveling with Friends	1	2–3 Days	Neutral	Yes	0	1	0	0	0	1	0	0	0	1	0	0	0	0	0	0	0	0	0	1	0	0	52	Acceptable	Enumerator 4
NC2025-0240	Valid Samples	2025-07-22	Nanchang East Railway Station	Female	18–24years	Bachelor's degree	Visitors from Other Cities in Jiangxi Province	High-Speed Rail / Train	Traveling with Friends	0	4–7 Days	Neutral	Yes	1	1	0	0	1	0	0	0	0	1	0	1	0	0	0	1	0	0	0	0	0	0	82	Excellent	Enumerator 2
NC2025-0241	Valid Samples	2025-07-01	Nanchang Changbei International Airport	Male	18–24years	Associate degree	Local Visitors from Nanchang	Airplane	Traveling with Partner	2	2–3 Days	Moderately Concerned	Yes	1	1	0	0	0	1	0	0	0	0	1	0	0	0	0	0	0	0	0	1	0	0	58	Acceptable	Enumerator 2
NC2025-0242	Valid Samples	2025-08-02	Nanchang West Railway Station	Male	35–44years	Bachelor's degree	Visitors from Other Provinces in China	High-Speed Rail / Train	Traveling with Friends	1	2–3 Days	Moderately Concerned	Yes	1	0	0	0	0	1	1	0	0	0	1	0	1	0	0	0	0	0	1	0	0	0	72	Very good	Enumerator 1
NC2025-0243	Valid Samples	2025-08-06	Nanchang South Railway Station	Male	18–24years	Bachelor's degree	Local Visitors from Nanchang	High-Speed Rail / Train	Traveling with Family/Children	0	1 Day	Neutral	No	0	0	0	0	1	0	0	0	0	1	0	0	0	1	0	1	0	0	0	0	0	1	58	Acceptable	Enumerator 1
NC2025-0244	Valid Samples	2025-07-02	Nanchang South Railway Station	Male	25–34years	Bachelor's degree	Visitors from Other Cities in Jiangxi Province	High-Speed Rail / Train	Traveling with Friends	0	2–3 Days	Neutral	Yes	0	0	0	0	1	0	0	0	0	0	1	0	1	0	1	0	1	0	0	0	0	0	81	Excellent	Enumerator 4
NC2025-0245	Valid Samples	2025-07-11	Nanchang West Railway Station	Male	18–24years	High school or below	Visitors from Other Provinces in China	High-Speed Rail / Train	Group Tour	0	More than 7 Days	Neutral	Yes	0	0	1	0	0	0	0	0	0	1	1	0	1	0	0	0	0	1	0	0	0	0	78	Very good	Enumerator 3
NC2025-0246	Valid Samples	2025-07-16	Nanchang East Railway Station	Male	18–24years	Bachelor's degree	Visitors from Other Provinces in China	High-Speed Rail / Train	Traveling with Friends	0	2–3 Days	Very Concerned	No	0	1	0	0	0	0	0	0	0	0	0	0	1	1	0	0	0	0	0	0	0	1	63	Good	Enumerator 2
NC2025-0247	Valid Samples	2025-08-09	Nanchang Changbei International Airport	Female	35–44years	High school or below	Visitors from Hong Kong, Macao, Taiwan, and Overseas	Airplane	Traveling with Partner	0	1 Day	Not Concerned at All	No	0	0	1	0	0	1	0	0	0	0	0	0	0	0	0	1	0	0	0	0	0	1	50	Acceptable	Enumerator 1
NC2025-0248	Valid Samples	2025-07-17	Nanchang West Railway Station	Female	18–24years	Associate degree	Visitors from Other Provinces in China	High-Speed Rail / Train	Traveling Alone	2	2–3 Days	Neutral	No	1	0	0	0	0	0	0	0	0	1	0	0	0	0	0	0	0	0	0	0	0	1	61	Good	Enumerator 2
NC2025-0250	Valid Samples	2025-07-29	Nanchang Railway Station	Male	18–24years	Bachelor's degree	Visitors from Other Provinces in China	High-Speed Rail / Train	Group Tour	0	2–3 Days	Very Concerned	Yes	1	1	0	1	1	1	1	0	0	0	1	1	0	0	0	0	0	1	0	1	0	0	63	Good	Enumerator 4
NC2025-0251	Valid Samples	2025-08-03	Nanchang Railway Station	Female	25–34years	Bachelor's degree	Visitors from Other Cities in Jiangxi Province	High-Speed Rail / Train	Traveling with Friends	0	Less than Half a Day	Very Concerned	No	0	1	1	1	0	0	0	0	0	1	1	1	0	0	0	0	0	0	0	0	0	1	53	Acceptable	Enumerator 3
NC2025-0252	Valid Samples	2025-07-07	Nanchang Railway Station	Female	25–34years	Master's degree or above	Visitors from Other Provinces in China	High-Speed Rail / Train	Traveling with Partner	0	2–3 Days	Neutral	No	1	0	1	1	0	0	1	0	0	0	1	1	0	0	0	1	0	0	0	0	0	1	67	Good	Enumerator 4
NC2025-0253	Valid Samples	2025-07-02	Nanchang West Railway Station	Female	18–24years	High school or below	Visitors from Other Cities in Jiangxi Province	Long-Distance Bus	Traveling with Friends	1	1 Day	Moderately Concerned	Yes	0	0	1	1	0	1	0	0	0	0	0	0	1	0	0	0	0	1	1	0	0	0	55	Acceptable	Enumerator 2
NC2025-0254	Valid Samples	2025-07-06	Nanchang Changbei International Airport	Female	45–59years	Associate degree	Visitors from Other Cities in Jiangxi Province	Private Car	Traveling with Friends	0	Less than Half a Day	Moderately Concerned	Yes	1	0	1	0	0	1	0	0	0	1	1	1	0	0	0	1	0	1	0	1	1	0	54	Acceptable	Enumerator 3
NC2025-0255	Valid Samples	2025-07-14	Nanchang South Railway Station	Male	35–44years	Associate degree	Visitors from Other Provinces in China	High-Speed Rail / Train	Traveling with Friends	0	1 Day	Moderately Concerned	No	0	1	0	0	1	0	0	0	0	1	1	1	0	0	0	1	0	0	0	0	0	1	77	Very good	Enumerator 2
NC2025-0256	Valid Samples	2025-08-14	Nanchang Changbei International Airport	Male	25–34years	Bachelor's degree	Visitors from Other Provinces in China	Airplane	Traveling with Family/Children	0	Less than Half a Day	Moderately Concerned	Yes	0	0	0	0	0	0	0	0	0	1	1	0	0	1	0	0	1	0	0	0	0	0	66	Good	Enumerator 1
NC2025-0257	Valid Samples	2025-07-17	Nanchang Railway Station	Male	18–24years	Associate degree	Visitors from Other Provinces in China	Long-Distance Bus	Traveling with Friends	0	2–3 Days	Moderately Concerned	Yes	1	0	1	0	1	0	0	0	0	1	0	0	1	0	0	0	0	1	1	0	0	0	76	Very good	Enumerator 2
NC2025-0258	Valid Samples	2025-07-29	Nanchang East Railway Station	Male	35–44years	Master's degree or above	Visitors from Other Provinces in China	High-Speed Rail / Train	Group Tour	1	2–3 Days	Moderately Concerned	No	1	1	1	1	0	1	0	0	0	1	0	0	0	0	0	0	0	0	0	0	0	1	81	Excellent	Enumerator 1
NC2025-0259	Valid Samples	2025-08-17	Nanchang West Railway Station	Female	45–59years	Bachelor's degree	Visitors from Other Provinces in China	Long-Distance Bus	Traveling with Friends	0	Less than Half a Day	Moderately Concerned	Yes	1	0	0	1	1	0	0	0	0	0	1	0	0	0	0	0	0	0	0	0	0	0	68	Good	Enumerator 4
NC2025-0260	Valid Samples	2025-08-01	Nanchang Changbei International Airport	Female	18–24years	Bachelor's degree	Visitors from Other Cities in Jiangxi Province	Airplane	Group Tour	0	1 Day	Very Concerned	Yes	1	0	1	1	0	1	0	0	0	1	0	1	0	0	0	0	0	0	0	0	1	0	59	Acceptable	Enumerator 2
NC2025-0261	Valid Samples	2025-07-18	Nanchang West Railway Station	Male	35–44years	Bachelor's degree	Visitors from Other Provinces in China	High-Speed Rail / Train	Group Tour	0	Less than Half a Day	Very Concerned	No	1	1	0	0	1	1	0	0	0	0	1	1	1	0	0	0	0	0	0	0	0	1	68	Good	Enumerator 4
NC2025-0262	Valid Samples	2025-07-14	Nanchang West Railway Station	Female	25–34years	Bachelor's degree	Visitors from Other Cities in Jiangxi Province	High-Speed Rail / Train	Traveling with Partner	2	4–7 Days	Neutral	Yes	1	1	1	0	1	1	0	0	0	1	1	0	0	0	0	0	0	0	0	0	0	0	76	Very good	Enumerator 3
NC2025-0263	Valid Samples	2025-08-09	Nanchang Railway Station	Female	35–44years	Associate degree	Visitors from Other Cities in Jiangxi Province	High-Speed Rail / Train	Traveling with Family/Children	0	4–7 Days	Moderately Concerned	No	1	0	1	0	1	0	0	0	0	1	0	0	0	0	0	0	0	0	0	0	0	1	48	Marginal	Enumerator 3
NC2025-0264	Valid Samples	2025-08-21	Nanchang Changbei International Airport	Female	25–34years	Bachelor's degree	Visitors from Other Provinces in China	Airplane	Traveling Alone	0	4–7 Days	Very Concerned	Yes	0	0	0	1	1	0	0	0	0	0	0	1	0	0	0	0	0	0	0	0	0	0	76	Very good	Enumerator 4
NC2025-0265	Valid Samples	2025-08-17	Nanchang South Railway Station	Male	18–24years	Bachelor's degree	Visitors from Other Cities in Jiangxi Province	High-Speed Rail / Train	Traveling with Family/Children	0	2–3 Days	Neutral	Yes	0	0	0	1	0	1	0	1	0	0	1	0	0	0	1	1	0	0	0	0	0	0	71	Very good	Enumerator 2
NC2025-0266	Valid Samples	2025-08-25	Nanchang West Railway Station	Female	45–59years	Bachelor's degree	Visitors from Other Provinces in China	High-Speed Rail / Train	Group Tour	0	2–3 Days	Neutral	Yes	1	0	1	0	1	0	0	0	0	1	0	1	0	1	0	0	1	0	0	1	0	0	49	Marginal	Enumerator 4
NC2025-0267	Valid Samples	2025-07-01	Nanchang Changbei International Airport	Male	25–34years	Master's degree or above	Local Visitors from Nanchang	Private Car	Traveling with Friends	0	2–3 Days	Slightly Concerned	No	0	0	0	0	1	1	0	0	0	0	0	0	1	0	0	0	0	0	0	0	0	1	69	Good	Enumerator 1
NC2025-0268	Valid Samples	2025-08-06	Nanchang Railway Station	Female	18–24years	Associate degree	Local Visitors from Nanchang	Private Car	Traveling with Family/Children	2	2–3 Days	Very Concerned	No	0	1	0	0	0	1	0	0	0	1	0	1	1	0	0	0	0	0	0	0	0	1	87	Excellent	Enumerator 3
NC2025-0269	Valid Samples	2025-08-12	Nanchang Changbei International Airport	Female	45–59years	Master's degree or above	Visitors from Other Provinces in China	Airplane	Traveling with Friends	0	Less than Half a Day	Very Concerned	No	0	0	0	0	0	1	1	0	0	1	0	0	1	1	0	0	0	0	0	0	0	1	100	Ideal	Enumerator 1
NC2025-0270	Valid Samples	2025-08-23	Nanchang Changbei International Airport	Male	25–34years	Associate degree	Visitors from Other Provinces in China	Airplane	Traveling Alone	0	Less than Half a Day	Slightly Concerned	No	0	0	1	0	0	0	0	0	0	1	1	1	0	0	0	0	0	0	0	0	0	1	76	Very good	Enumerator 4
NC2025-0271	Valid Samples	2025-08-06	Nanchang South Railway Station	Female	45–59years	Bachelor's degree	Visitors from Other Cities in Jiangxi Province	High-Speed Rail / Train	Traveling with Friends	0	1 Day	Very Concerned	Yes	1	0	1	1	0	1	0	0	0	0	1	1	0	0	0	0	0	0	0	0	0	0	72	Very good	Enumerator 3
NC2025-0272	Valid Samples	2025-08-29	Nanchang West Railway Station	Male	45–59years	Master's degree or above	Visitors from Other Provinces in China	Local Public Transportation	Traveling with Family/Children	1	1 Day	Moderately Concerned	Yes	1	0	1	0	0	0	0	0	0	1	0	0	0	1	0	0	1	1	0	0	1	0	78	Very good	Enumerator 4
NC2025-0273	Valid Samples	2025-08-05	Nanchang South Railway Station	Male	35–44years	Bachelor's degree	Visitors from Other Provinces in China	High-Speed Rail / Train	Traveling with Friends	0	1 Day	Neutral	Yes	1	0	0	0	0	1	1	0	0	0	0	0	1	0	1	0	1	0	0	0	0	0	68	Good	Enumerator 2
NC2025-0274	Valid Samples	2025-07-22	Nanchang Changbei International Airport	Male	35–44years	Associate degree	Visitors from Other Provinces in China	Airplane	Traveling Alone	0	2–3 Days	Neutral	No	0	0	1	1	0	1	0	0	0	1	0	0	1	0	0	0	0	0	0	0	0	1	62	Good	Enumerator 3
NC2025-0275	Valid Samples	2025-07-04	Nanchang South Railway Station	Female	25–34years	Master's degree or above	Visitors from Other Provinces in China	High-Speed Rail / Train	Traveling with Partner	0	Less than Half a Day	Neutral	No	1	1	0	0	0	0	1	0	0	1	1	0	1	0	0	0	0	0	0	0	0	1	57	Acceptable	Enumerator 1
NC2025-0276	Valid Samples	2025-08-10	Nanchang Railway Station	Female	35–44years	High school or below	Visitors from Other Provinces in China	Private Car	Traveling with Family/Children	0	2–3 Days	Very Concerned	Yes	1	1	0	1	0	0	0	0	0	1	1	1	1	0	0	1	1	1	1	0	0	0	58	Acceptable	Enumerator 1
NC2025-0277	Valid Samples	2025-08-04	Nanchang Changbei International Airport	Female	25–34years	Associate degree	Local Visitors from Nanchang	Private Car	Group Tour	0	1 Day	Moderately Concerned	No	1	0	1	0	0	0	0	0	0	0	1	1	0	0	0	0	0	0	0	0	0	1	65	Good	Enumerator 4
NC2025-0278	Valid Samples	2025-07-20	Nanchang Railway Station	Other / Prefer not to say	25–34years	Bachelor's degree	Local Visitors from Nanchang	High-Speed Rail / Train	Traveling with Friends	0	2–3 Days	Very Concerned	No	1	1	0	0	1	0	0	0	0	1	0	1	0	0	0	1	0	0	0	0	0	1	58	Acceptable	Enumerator 1
NC2025-0279	Valid Samples	2025-07-14	Nanchang East Railway Station	Female	18–24years	High school or below	Visitors from Other Provinces in China	High-Speed Rail / Train	Group Tour	0	2–3 Days	Moderately Concerned	No	0	0	1	0	0	1	1	0	0	0	1	0	1	0	1	1	0	0	0	0	0	1	89	Excellent	Enumerator 2
NC2025-0280	Valid Samples	2025-08-20	Nanchang South Railway Station	Female	25–34years	Associate degree	Visitors from Other Cities in Jiangxi Province	High-Speed Rail / Train	Group Tour	1	1 Day	Moderately Concerned	No	1	0	0	0	0	1	0	0	0	1	0	0	0	1	0	0	0	0	0	0	0	1	68	Good	Enumerator 2
NC2025-0281	Valid Samples	2025-08-04	Nanchang Changbei International Airport	Female	18–24years	Bachelor's degree	Visitors from Other Cities in Jiangxi Province	Airplane	Traveling with Family/Children	0	2–3 Days	Moderately Concerned	No	1	1	1	0	0	0	0	0	0	1	1	1	0	0	0	0	0	0	0	0	0	1	69	Good	Enumerator 4
NC2025-0282	Valid Samples	2025-08-23	Nanchang Railway Station	Female	45–59years	Bachelor's degree	Visitors from Other Provinces in China	Long-Distance Bus	Traveling Alone	0	1 Day	Moderately Concerned	Yes	1	1	0	0	0	1	0	0	0	1	0	1	0	0	0	0	0	1	0	1	0	0	77	Very good	Enumerator 4
NC2025-0283	Valid Samples	2025-06-30	Nanchang Railway Station	Female	18–24years	High school or below	Local Visitors from Nanchang	High-Speed Rail / Train	Traveling with Partner	0	More than 7 Days	Very Concerned	No	0	0	0	0	0	1	0	0	0	1	0	0	0	0	0	0	0	0	0	0	0	1	60	Good	Enumerator 2
NC2025-0284	Valid Samples	2025-08-02	Nanchang East Railway Station	Female	18–24years	High school or below	Visitors from Other Provinces in China	Private Car	Traveling with Family/Children	0	2–3 Days	Very Concerned	No	1	1	1	0	0	0	0	0	0	1	0	0	0	1	0	0	0	0	0	0	0	1	36	nfavorable	Enumerator 3
NC2025-0285	Valid Samples	2025-07-25	Nanchang West Railway Station	Female	25–34years	Associate degree	Visitors from Other Cities in Jiangxi Province	Long-Distance Bus	Traveling with Friends	0	4–7 Days	Very Concerned	No	0	1	0	0	0	1	0	0	0	1	1	0	0	1	0	0	0	0	0	0	0	1	66	Good	Enumerator 3
NC2025-0286	Valid Samples	2025-07-12	Nanchang East Railway Station	Male	25–34years	Associate degree	Visitors from Other Cities in Jiangxi Province	High-Speed Rail / Train	Traveling with Family/Children	2	2–3 Days	Moderately Concerned	No	1	1	1	1	0	0	0	0	0	0	1	1	0	1	0	0	0	0	0	0	0	1	54	Acceptable	Enumerator 4
NC2025-0287	Valid Samples	2025-07-28	Nanchang Changbei International Airport	Female	25–34years	Associate degree	Visitors from Other Provinces in China	Airplane	Traveling with Partner	0	1 Day	Neutral	Yes	1	0	0	1	1	1	0	1	0	1	0	1	1	0	0	1	0	0	0	0	0	0	60	Good	Enumerator 2
NC2025-0288	Valid Samples	2025-08-20	Nanchang Railway Station	Male	35–44years	Associate degree	Visitors from Other Cities in Jiangxi Province	High-Speed Rail / Train	Group Tour	0	2–3 Days	Neutral	Yes	1	0	0	0	1	1	1	0	0	1	0	0	1	0	1	0	0	0	0	0	1	0	78	Very good	Enumerator 3
NC2025-0289	Valid Samples	2025-07-20	Nanchang East Railway Station	Male	≥60years	Associate degree	Visitors from Other Provinces in China	High-Speed Rail / Train	Traveling with Friends	2	1 Day	Moderately Concerned	No	0	1	1	1	0	0	0	0	0	1	0	0	0	0	0	0	0	0	0	0	0	1	66	Good	Enumerator 2
NC2025-0290	Valid Samples	2025-08-10	Nanchang West Railway Station	Female	18–24years	Bachelor's degree	Visitors from Other Provinces in China	High-Speed Rail / Train	Traveling with Family/Children	0	1 Day	Slightly Concerned	No	1	0	1	0	1	0	0	0	0	0	0	0	1	1	0	0	0	0	0	0	0	1	69	Good	Enumerator 3
NC2025-0291	Valid Samples	2025-07-29	Nanchang Railway Station	Female	25–34years	Bachelor's degree	Visitors from Other Provinces in China	Private Car	Traveling with Family/Children	1	1 Day	Very Concerned	Yes	1	0	0	0	0	0	0	1	0	0	1	0	0	0	0	0	0	0	0	1	1	0	76	Very good	Enumerator 4
NC2025-0292	Valid Samples	2025-07-02	Nanchang Changbei International Airport	Female	25–34years	Associate degree	Local Visitors from Nanchang	Airplane	Traveling with Friends	1	2–3 Days	Moderately Concerned	No	1	0	1	1	0	0	0	0	0	1	0	0	0	0	0	0	0	0	0	0	0	1	67	Good	Enumerator 4
NC2025-0293	Valid Samples	2025-06-30	Nanchang South Railway Station	Female	25–34years	High school or below	Visitors from Other Cities in Jiangxi Province	High-Speed Rail / Train	Group Tour	0	2–3 Days	Very Concerned	Yes	0	1	0	1	0	0	1	1	0	1	0	1	1	1	0	0	1	1	0	0	0	0	70	Very good	Enumerator 1
NC2025-0294	Valid Samples	2025-08-03	Nanchang Changbei International Airport	Male	35–44years	Bachelor's degree	Visitors from Other Provinces in China	Airplane	Traveling with Partner	2	Less than Half a Day	Slightly Concerned	Yes	0	0	0	0	0	0	0	0	0	0	1	1	0	0	0	0	0	0	0	0	0	0	53	Acceptable	Enumerator 4
NC2025-0295	Valid Samples	2025-07-13	Nanchang Railway Station	Female	25–34years	Bachelor's degree	Local Visitors from Nanchang	High-Speed Rail / Train	Group Tour	0	2–3 Days	Slightly Concerned	Yes	0	1	1	1	0	1	1	0	0	0	1	0	1	0	0	0	0	0	1	0	0	0	65	Good	Enumerator 2
NC2025-0296	Valid Samples	2025-07-14	Nanchang Changbei International Airport	Male	35–44years	Bachelor's degree	Visitors from Other Cities in Jiangxi Province	Airplane	Traveling with Family/Children	0	2–3 Days	Moderately Concerned	Yes	1	1	1	1	0	0	0	0	0	0	1	0	1	0	0	0	0	0	0	0	0	0	55	Acceptable	Enumerator 1
NC2025-0297	Valid Samples	2025-07-07	Nanchang South Railway Station	Female	25–34years	Associate degree	Visitors from Other Provinces in China	High-Speed Rail / Train	Traveling with Family/Children	1	2–3 Days	Very Concerned	No	0	0	0	0	0	0	1	0	0	1	1	1	1	1	0	0	0	0	0	0	0	1	74	Very good	Enumerator 1
NC2025-0298	Valid Samples	2025-07-02	Nanchang Railway Station	Male	18–24years	Master's degree or above	Local Visitors from Nanchang	High-Speed Rail / Train	Traveling with Family/Children	0	1 Day	Very Concerned	No	0	0	0	1	1	0	0	0	1	0	0	0	0	0	0	1	0	0	0	0	0	1	62	Good	Enumerator 2
NC2025-0299	Valid Samples	2025-08-24	Nanchang Railway Station	Male	25–34years	Bachelor's degree	Visitors from Other Provinces in China	High-Speed Rail / Train	Traveling with Family/Children	1	2–3 Days	Neutral	No	1	0	0	1	0	0	0	0	0	1	0	0	0	1	0	0	0	0	0	0	0	1	47	Marginal	Enumerator 4
NC2025-0300	Valid Samples	2025-07-08	Nanchang Railway Station	Male	35–44years	Associate degree	Visitors from Other Cities in Jiangxi Province	Private Car	Traveling Alone	0	1 Day	Very Concerned	Yes	1	1	0	0	1	1	1	0	0	0	0	0	1	1	0	0	0	0	0	1	0	0	65	Good	Enumerator 4
NC2025-0301	Valid Samples	2025-08-19	Nanchang East Railway Station	Female	25–34years	Bachelor's degree	Visitors from Other Provinces in China	High-Speed Rail / Train	Traveling with Friends	2	2–3 Days	Very Concerned	Yes	1	0	0	0	1	1	0	0	0	1	1	0	0	0	0	0	0	0	1	0	0	0	61	Good	Enumerator 3
NC2025-0302	Valid Samples	2025-08-15	Nanchang Changbei International Airport	Female	25–34years	High school or below	Visitors from Other Provinces in China	Airplane	Traveling with Family/Children	0	1 Day	Moderately Concerned	No	1	0	1	1	1	1	0	0	0	1	0	0	0	0	0	0	0	0	0	0	0	1	75	Very good	Enumerator 3
NC2025-0303	Valid Samples	2025-07-23	Nanchang Changbei International Airport	Female	18–24years	Master's degree or above	Visitors from Other Provinces in China	Airplane	Traveling with Family/Children	2	2–3 Days	Moderately Concerned	No	0	0	0	0	1	0	0	0	0	1	0	0	1	1	0	0	0	0	0	0	0	1	60	Good	Enumerator 2
NC2025-0304	Valid Samples	2025-07-10	Nanchang East Railway Station	Female	18–24years	Bachelor's degree	Visitors from Other Cities in Jiangxi Province	High-Speed Rail / Train	Group Tour	0	2–3 Days	Moderately Concerned	No	0	0	1	0	0	1	0	0	0	0	0	1	1	0	0	0	0	0	0	0	0	1	69	Good	Enumerator 1
NC2025-0305	Valid Samples	2025-07-09	Nanchang South Railway Station	Male	≥60years	Bachelor's degree	Visitors from Other Provinces in China	High-Speed Rail / Train	Traveling with Friends	0	Less than Half a Day	Very Concerned	Yes	1	1	0	1	0	0	1	0	0	0	0	1	0	0	1	0	0	0	0	0	0	0	87	Excellent	Enumerator 3
NC2025-0307	Valid Samples	2025-08-01	Nanchang West Railway Station	Female	18–24years	Associate degree	Visitors from Other Provinces in China	High-Speed Rail / Train	Traveling Alone	0	1 Day	Very Concerned	Yes	1	0	0	0	0	0	0	0	0	1	1	1	0	0	0	0	0	0	0	0	0	0	57	Acceptable	Enumerator 3
NC2025-0308	Valid Samples	2025-07-18	Nanchang East Railway Station	Male	25–34years	High school or below	Visitors from Other Cities in Jiangxi Province	High-Speed Rail / Train	Traveling with Friends	0	More than 7 Days	Slightly Concerned	No	1	0	0	0	0	0	0	0	0	1	1	1	0	0	0	0	0	0	0	0	0	1	63	Good	Enumerator 1
NC2025-0309	Valid Samples	2025-08-05	Nanchang Railway Station	Female	25–34years	Master's degree or above	Visitors from Other Provinces in China	High-Speed Rail / Train	Traveling with Friends	0	1 Day	Very Concerned	Yes	1	0	0	1	1	1	0	0	0	0	1	0	0	0	0	0	0	0	0	0	0	0	46	Marginal	Enumerator 4
NC2025-0310	Valid Samples	2025-08-03	Nanchang Railway Station	Male	25–34years	Bachelor's degree	Visitors from Other Provinces in China	High-Speed Rail / Train	Traveling with Friends	0	2–3 Days	Moderately Concerned	No	1	1	0	0	0	1	0	0	0	1	0	1	0	1	0	0	0	0	0	0	0	1	69	Good	Enumerator 2
NC2025-0311	Valid Samples	2025-08-30	Nanchang Railway Station	Female	18–24years	Bachelor's degree	Visitors from Other Cities in Jiangxi Province	Private Car	Traveling with Family/Children	2	2–3 Days	Neutral	No	1	1	0	1	0	1	1	0	0	0	0	0	1	0	0	0	0	0	0	0	0	1	64	Good	Enumerator 3
NC2025-0312	Valid Samples	2025-08-05	Nanchang East Railway Station	Male	18–24years	Bachelor's degree	Visitors from Other Cities in Jiangxi Province	High-Speed Rail / Train	Traveling Alone	0	1 Day	Neutral	No	0	1	1	0	1	0	0	0	0	1	1	0	0	1	0	0	0	0	0	0	0	1	79	Very good	Enumerator 4
NC2025-0313	Valid Samples	2025-07-17	Nanchang South Railway Station	Male	35–44years	Associate degree	Visitors from Other Provinces in China	High-Speed Rail / Train	Traveling Alone	0	1 Day	Moderately Concerned	No	1	1	0	1	0	0	1	0	0	1	1	0	1	0	0	0	0	0	0	0	0	1	77	Very good	Enumerator 1
NC2025-0314	Valid Samples	2025-08-09	Nanchang Changbei International Airport	Female	18–24years	Bachelor's degree	Visitors from Other Provinces in China	Private Car	Traveling with Family/Children	0	2–3 Days	Neutral	Yes	0	0	1	0	0	1	0	0	0	0	1	0	1	0	0	0	0	0	0	1	0	0	65	Good	Enumerator 2
NC2025-0315	Valid Samples	2025-08-19	Nanchang Railway Station	Female	25–34years	Master's degree or above	Visitors from Other Provinces in China	High-Speed Rail / Train	Group Tour	0	2–3 Days	Slightly Concerned	Yes	1	0	0	1	0	1	0	0	0	0	0	0	0	0	1	0	0	0	1	0	0	0	67	Good	Enumerator 4
NC2025-0316	Valid Samples	2025-07-24	Nanchang West Railway Station	Female	25–34years	Bachelor's degree	Visitors from Other Provinces in China	Private Car	Traveling with Friends	0	4–7 Days	Neutral	No	0	1	0	0	1	1	1	1	0	0	0	0	0	0	0	1	0	0	0	0	0	1	66	Good	Enumerator 2
NC2025-0317	Valid Samples	2025-07-08	Nanchang East Railway Station	Female	≥60years	Bachelor's degree	Visitors from Hong Kong, Macao, Taiwan, and Overseas	High-Speed Rail / Train	Traveling with Family/Children	1	Less than Half a Day	Moderately Concerned	Yes	0	0	1	0	0	0	1	0	0	0	0	0	1	0	0	0	0	0	0	0	0	0	53	Acceptable	Enumerator 1
NC2025-0318	Valid Samples	2025-08-01	Nanchang West Railway Station	Female	25–34years	Bachelor's degree	Local Visitors from Nanchang	High-Speed Rail / Train	Traveling Alone	0	Less than Half a Day	Moderately Concerned	No	0	1	0	0	0	0	1	0	0	0	0	0	0	1	1	1	0	0	0	0	0	1	84	Excellent	Enumerator 4
NC2025-0319	Valid Samples	2025-08-18	Nanchang West Railway Station	Female	35–44years	High school or below	Visitors from Other Provinces in China	Private Car	Traveling with Friends	0	2–3 Days	Moderately Concerned	No	0	1	1	1	1	0	0	0	0	1	1	1	1	0	0	0	0	0	0	0	0	1	75	Very good	Enumerator 4
NC2025-0320	Valid Samples	2025-08-13	Nanchang West Railway Station	Male	45–59years	Bachelor's degree	Visitors from Other Provinces in China	High-Speed Rail / Train	Traveling Alone	0	2–3 Days	Very Concerned	No	1	1	1	1	0	0	0	0	0	1	0	0	1	1	0	0	0	0	0	0	0	1	79	Very good	Enumerator 2
NC2025-0321	Valid Samples	2025-08-17	Nanchang South Railway Station	Female	18–24years	Bachelor's degree	Visitors from Other Provinces in China	High-Speed Rail / Train	Traveling with Friends	2	4–7 Days	Neutral	No	0	1	1	0	0	1	0	0	1	0	0	0	1	0	0	0	0	0	0	0	0	1	70	Very good	Enumerator 4
NC2025-0322	Valid Samples	2025-08-15	Nanchang West Railway Station	Female	25–34years	Associate degree	Visitors from Other Provinces in China	High-Speed Rail / Train	Traveling with Friends	0	Less than Half a Day	Neutral	Yes	1	1	0	0	0	1	0	0	0	1	1	1	1	1	1	0	0	0	0	1	0	0	68	Good	Enumerator 3
NC2025-0323	Valid Samples	2025-08-11	Nanchang South Railway Station	Male	45–59years	Bachelor's degree	Local Visitors from Nanchang	High-Speed Rail / Train	Traveling with Family/Children	0	1 Day	Moderately Concerned	No	1	1	1	0	1	0	0	0	0	1	0	0	1	1	0	0	0	0	0	0	0	1	60	Good	Enumerator 2
NC2025-0324	Valid Samples	2025-07-31	Nanchang Changbei International Airport	Male	25–34years	Master's degree or above	Visitors from Other Cities in Jiangxi Province	Airplane	Traveling with Family/Children	0	Less than Half a Day	Moderately Concerned	Yes	1	1	0	1	0	1	0	0	0	1	1	1	0	0	0	0	0	0	1	0	0	0	69	Good	Enumerator 3
NC2025-0325	Valid Samples	2025-08-03	Nanchang East Railway Station	Male	45–59years	Bachelor's degree	Visitors from Other Provinces in China	High-Speed Rail / Train	Traveling with Family/Children	0	1 Day	Moderately Concerned	Yes	0	0	1	0	0	1	0	0	0	0	1	0	0	0	0	0	0	0	0	0	0	0	72	Very good	Enumerator 2
NC2025-0326	Valid Samples	2025-08-13	Nanchang South Railway Station	Female	18–24years	High school or below	Local Visitors from Nanchang	High-Speed Rail / Train	Traveling with Family/Children	0	2–3 Days	Very Concerned	Yes	1	0	0	0	0	0	0	0	0	0	0	0	0	0	1	1	0	0	0	0	0	0	80	Excellent	Enumerator 4
NC2025-0327	Valid Samples	2025-07-08	Nanchang Changbei International Airport	Male	35–44years	Master's degree or above	Visitors from Other Cities in Jiangxi Province	Private Car	Traveling with Friends	0	1 Day	Moderately Concerned	No	1	1	0	0	1	1	0	0	0	1	0	0	0	0	0	0	0	0	0	0	0	1	59	Acceptable	Enumerator 1
NC2025-0328	Valid Samples	2025-07-06	Nanchang South Railway Station	Male	25–34years	Master's degree or above	Visitors from Other Provinces in China	High-Speed Rail / Train	Traveling with Friends	0	2–3 Days	Neutral	No	0	1	1	1	1	0	1	0	0	1	0	1	1	0	0	0	0	0	0	0	0	1	77	Very good	Enumerator 4
NC2025-0329	Valid Samples	2025-07-01	Nanchang South Railway Station	Female	25–34years	Master's degree or above	Visitors from Other Cities in Jiangxi Province	High-Speed Rail / Train	Traveling with Family/Children	0	4–7 Days	Moderately Concerned	Yes	1	1	1	0	0	1	0	0	0	0	0	0	1	0	0	0	0	1	0	0	0	0	66	Good	Enumerator 2
NC2025-0330	Valid Samples	2025-07-20	Nanchang West Railway Station	Female	25–34years	Bachelor's degree	Visitors from Other Cities in Jiangxi Province	High-Speed Rail / Train	Traveling Alone	0	4–7 Days	Moderately Concerned	No	1	1	1	0	0	1	0	0	0	1	0	1	0	0	0	0	0	0	0	0	0	1	65	Good	Enumerator 1
NC2025-0331	Valid Samples	2025-08-08	Nanchang West Railway Station	Male	35–44years	Associate degree	Visitors from Other Provinces in China	Private Car	Traveling with Family/Children	0	2–3 Days	Moderately Concerned	No	1	0	1	0	0	1	1	0	0	0	0	0	0	0	0	0	0	0	0	0	0	1	69	Good	Enumerator 4
NC2025-0332	Valid Samples	2025-08-16	Nanchang Railway Station	Female	≥60years	Associate degree	Visitors from Other Cities in Jiangxi Province	High-Speed Rail / Train	Traveling with Family/Children	1	4–7 Days	Very Concerned	Yes	0	1	0	1	1	1	0	0	0	0	0	0	0	1	0	0	1	0	0	0	0	0	55	Acceptable	Enumerator 2
NC2025-0333	Valid Samples	2025-08-26	Nanchang West Railway Station	Male	25–34years	Bachelor's degree	Visitors from Other Provinces in China	High-Speed Rail / Train	Traveling with Friends	0	1 Day	Moderately Concerned	No	0	0	1	0	0	1	0	0	0	1	1	0	0	0	0	0	0	0	0	0	0	1	73	Very good	Enumerator 3
NC2025-0334	Valid Samples	2025-08-08	Nanchang South Railway Station	Female	25–34years	Bachelor's degree	Visitors from Other Provinces in China	High-Speed Rail / Train	Traveling with Family/Children	1	1 Day	Slightly Concerned	No	0	0	1	1	0	1	0	0	0	1	0	0	0	0	0	0	0	0	0	0	0	1	68	Good	Enumerator 2
NC2025-0335	Valid Samples	2025-08-16	Nanchang East Railway Station	Female	18–24years	Bachelor's degree	Visitors from Other Cities in Jiangxi Province	Local Public Transportation	Traveling with Friends	2	1 Day	Moderately Concerned	No	1	1	1	0	0	1	0	0	0	1	0	1	0	1	0	0	0	0	0	0	0	1	57	Acceptable	Enumerator 3
NC2025-0336	Valid Samples	2025-07-26	Nanchang Changbei International Airport	Male	18–24years	Associate degree	Visitors from Other Provinces in China	Airplane	Traveling with Family/Children	0	1 Day	Neutral	No	0	1	0	0	0	0	0	0	0	0	1	1	0	0	0	0	0	0	0	0	0	1	65	Good	Enumerator 4
NC2025-0338	Valid Samples	2025-07-14	Nanchang Railway Station	Female	25–34years	Bachelor's degree	Visitors from Other Provinces in China	High-Speed Rail / Train	Traveling with Family/Children	0	2–3 Days	Neutral	No	1	0	1	0	0	0	0	0	0	1	0	1	0	0	0	0	0	0	0	0	0	1	64	Good	Enumerator 2
NC2025-0339	Valid Samples	2025-08-19	Nanchang Changbei International Airport	Female	45–59years	High school or below	Visitors from Other Provinces in China	Airplane	Traveling with Friends	0	1 Day	Slightly Concerned	No	1	1	1	0	0	1	0	0	0	1	0	0	0	1	1	1	0	0	0	0	0	1	65	Good	Enumerator 4
NC2025-0340	Valid Samples	2025-07-27	Nanchang South Railway Station	Female	45–59years	Bachelor's degree	Visitors from Other Cities in Jiangxi Province	High-Speed Rail / Train	Traveling with Family/Children	0	2–3 Days	Moderately Concerned	Yes	0	0	0	1	0	1	0	0	0	1	0	0	0	1	0	0	1	0	0	0	0	0	63	Good	Enumerator 4
NC2025-0341	Valid Samples	2025-07-01	Nanchang Railway Station	Female	45–59years	Master's degree or above	Visitors from Other Cities in Jiangxi Province	Local Public Transportation	Traveling with Family/Children	0	2–3 Days	Moderately Concerned	Yes	0	0	1	1	0	0	0	1	0	0	0	0	1	0	0	0	0	0	0	0	0	0	49	Marginal	Enumerator 1
NC2025-0342	Valid Samples	2025-07-05	Nanchang Railway Station	Male	25–34years	High school or below	Local Visitors from Nanchang	Private Car	Traveling with Friends	0	4–7 Days	Very Concerned	No	0	0	1	0	0	1	0	0	0	0	0	0	0	0	0	1	0	0	0	0	0	1	76	Very good	Enumerator 1
NC2025-0343	Valid Samples	2025-07-23	Nanchang Railway Station	Male	18–24years	Bachelor's degree	Visitors from Other Provinces in China	High-Speed Rail / Train	Traveling with Family/Children	0	1 Day	Moderately Concerned	Yes	0	1	1	0	1	1	1	0	0	0	0	0	0	0	0	0	0	1	0	0	1	0	75	Very good	Enumerator 2
NC2025-0344	Valid Samples	2025-07-21	Nanchang Changbei International Airport	Male	18–24years	Bachelor's degree	Visitors from Other Cities in Jiangxi Province	Airplane	Group Tour	0	Less than Half a Day	Neutral	Yes	0	0	0	1	1	1	0	0	0	0	0	1	0	0	0	0	0	1	0	1	1	0	52	Acceptable	Enumerator 4
NC2025-0345	Valid Samples	2025-07-12	Nanchang South Railway Station	Male	25–34years	Bachelor's degree	Local Visitors from Nanchang	High-Speed Rail / Train	Traveling with Friends	0	2–3 Days	Moderately Concerned	Yes	1	0	1	0	0	1	0	0	0	0	1	0	1	0	0	0	0	0	0	0	0	0	86	Excellent	Enumerator 1
NC2025-0346	Valid Samples	2025-07-13	Nanchang Changbei International Airport	Female	18–24years	Master's degree or above	Visitors from Other Provinces in China	Airplane	Traveling with Friends	0	2–3 Days	Neutral	No	0	0	1	1	0	0	0	0	0	0	0	1	0	1	1	0	0	0	0	0	0	1	79	Very good	Enumerator 2
NC2025-0347	Valid Samples	2025-08-17	Nanchang West Railway Station	Female	18–24years	High school or below	Local Visitors from Nanchang	High-Speed Rail / Train	Traveling with Partner	0	2–3 Days	Neutral	Yes	0	0	0	0	0	0	0	0	0	0	0	0	0	0	0	0	0	0	0	0	0	0	50	Acceptable	Enumerator 2
NC2025-0348	Valid Samples	2025-08-19	Nanchang Railway Station	Female	25–34years	Bachelor's degree	Visitors from Other Provinces in China	High-Speed Rail / Train	Traveling with Friends	0	4–7 Days	Neutral	Yes	1	0	1	0	0	0	0	0	0	1	0	1	1	1	0	0	0	1	1	0	0	0	49	Marginal	Enumerator 1
NC2025-0349	Valid Samples	2025-06-30	Nanchang East Railway Station	Male	35–44years	Bachelor's degree	Visitors from Other Cities in Jiangxi Province	High-Speed Rail / Train	Traveling with Family/Children	2	1 Day	Moderately Concerned	Yes	1	0	0	0	0	1	1	1	0	1	0	0	1	0	0	1	1	1	1	1	0	0	75	Very good	Enumerator 3
NC2025-0350	Valid Samples	2025-07-01	Nanchang West Railway Station	Female	25–34years	Bachelor's degree	Visitors from Other Cities in Jiangxi Province	High-Speed Rail / Train	Group Tour	0	2–3 Days	Moderately Concerned	No	0	1	1	1	1	0	0	1	0	0	0	1	0	0	0	0	0	0	0	0	0	1	44	Marginal	Enumerator 2
NC2025-0351	Valid Samples	2025-07-09	Nanchang Changbei International Airport	Male	25–34years	Associate degree	Visitors from Other Cities in Jiangxi Province	Airplane	Traveling with Friends	0	2–3 Days	Neutral	No	0	0	1	1	1	1	0	0	0	1	1	0	0	0	1	0	0	0	0	0	0	1	78	Very good	Enumerator 1
NC2025-0352	Valid Samples	2025-08-24	Nanchang South Railway Station	Female	25–34years	Master's degree or above	Visitors from Other Provinces in China	High-Speed Rail / Train	Traveling with Family/Children	2	2–3 Days	Moderately Concerned	No	1	0	0	1	0	0	0	0	0	1	0	0	1	0	0	0	0	0	0	0	0	1	70	Very good	Enumerator 3
NC2025-0353	Valid Samples	2025-07-04	Nanchang East Railway Station	Female	18–24years	High school or below	Local Visitors from Nanchang	Local Public Transportation	Traveling with Partner	4	2–3 Days	Moderately Concerned	Yes	1	0	1	1	0	1	0	0	0	0	1	0	1	0	0	0	1	0	1	0	0	0	53	Acceptable	Enumerator 2
NC2025-0355	Valid Samples	2025-07-10	Nanchang Railway Station	Female	45–59years	High school or below	Visitors from Other Cities in Jiangxi Province	High-Speed Rail / Train	Traveling with Family/Children	2	Less than Half a Day	Very Concerned	No	1	1	1	1	0	0	0	0	0	0	1	0	0	0	0	0	0	0	0	0	0	1	72	Very good	Enumerator 1
NC2025-0356	Valid Samples	2025-07-07	Nanchang Changbei International Airport	Male	45–59years	Associate degree	Visitors from Other Cities in Jiangxi Province	Airplane	Traveling with Friends	0	More than 7 Days	Very Concerned	Yes	1	0	0	1	0	1	1	0	0	0	1	0	0	0	0	0	0	0	0	0	0	0	62	Good	Enumerator 1
NC2025-0359	Valid Samples	2025-07-30	Nanchang Changbei International Airport	Male	25–34years	Bachelor's degree	Visitors from Other Provinces in China	Airplane	Group Tour	1	1 Day	Moderately Concerned	Yes	0	1	0	0	1	0	0	0	0	0	0	0	1	0	0	0	1	0	0	1	1	0	72	Very good	Enumerator 2
NC2025-0360	Valid Samples	2025-07-22	Nanchang South Railway Station	Female	25–34years	Bachelor's degree	Visitors from Other Provinces in China	High-Speed Rail / Train	Traveling with Friends	0	2–3 Days	Moderately Concerned	No	1	0	0	1	0	0	0	0	0	1	1	0	0	0	0	0	0	0	0	0	0	1	51	Acceptable	Enumerator 2
NC2025-0361	Valid Samples	2025-07-07	Nanchang South Railway Station	Female	18–24years	Bachelor's degree	Visitors from Other Provinces in China	High-Speed Rail / Train	Traveling Alone	0	2–3 Days	Neutral	Yes	1	0	0	0	1	0	0	0	0	0	0	1	0	0	0	0	0	0	0	0	0	0	77	Very good	Enumerator 4
NC2025-0362	Valid Samples	2025-07-31	Nanchang East Railway Station	Female	18–24years	Bachelor's degree	Visitors from Other Provinces in China	Private Car	Traveling with Family/Children	0	1 Day	Moderately Concerned	No	1	1	0	0	0	0	0	0	0	1	0	0	1	0	0	0	0	0	0	0	0	1	52	Acceptable	Enumerator 4
NC2025-0363	Valid Samples	2025-08-29	Nanchang Changbei International Airport	Female	25–34years	Bachelor's degree	Visitors from Other Cities in Jiangxi Province	Airplane	Traveling with Family/Children	0	2–3 Days	Neutral	No	1	1	1	1	1	0	0	0	0	0	1	1	1	0	1	0	0	0	0	0	0	1	72	Very good	Enumerator 1
NC2025-0364	Valid Samples	2025-08-21	Nanchang South Railway Station	Male	≥60years	High school or below	Local Visitors from Nanchang	High-Speed Rail / Train	Traveling with Family/Children	1	2–3 Days	Very Concerned	Yes	0	0	0	0	0	0	0	0	0	0	0	0	1	1	0	0	1	0	0	0	0	0	57	Acceptable	Enumerator 2
NC2025-0365	Valid Samples	2025-07-31	Nanchang East Railway Station	Female	25–34years	Bachelor's degree	Visitors from Other Cities in Jiangxi Province	Private Car	Traveling with Friends	2	4–7 Days	Moderately Concerned	No	0	0	0	0	1	0	0	0	0	1	0	0	1	0	1	1	0	0	0	0	0	1	70	Very good	Enumerator 4
NC2025-0366	Valid Samples	2025-07-02	Nanchang South Railway Station	Female	25–34years	Bachelor's degree	Local Visitors from Nanchang	High-Speed Rail / Train	Traveling with Friends	0	1 Day	Very Concerned	Yes	1	1	1	0	0	0	0	0	0	1	1	0	0	0	1	0	0	0	1	0	0	0	42	Marginal	Enumerator 2
NC2025-0367	Valid Samples	2025-07-06	Nanchang East Railway Station	Female	35–44years	Associate degree	Visitors from Other Provinces in China	High-Speed Rail / Train	Traveling with Friends	2	2–3 Days	Moderately Concerned	Yes	0	1	0	1	0	1	0	0	0	1	1	1	1	0	0	0	1	0	1	0	0	0	59	Acceptable	Enumerator 3
NC2025-0368	Valid Samples	2025-07-05	Nanchang East Railway Station	Male	18–24years	Associate degree	Visitors from Other Provinces in China	Private Car	Traveling with Family/Children	0	1 Day	Neutral	No	1	0	1	0	0	1	0	0	0	0	0	0	0	0	0	0	0	0	0	0	0	1	64	Good	Enumerator 4
NC2025-0369	Valid Samples	2025-07-09	Nanchang West Railway Station	Female	18–24years	Bachelor's degree	Visitors from Other Provinces in China	High-Speed Rail / Train	Traveling with Family/Children	2	2–3 Days	Moderately Concerned	Yes	1	0	1	0	0	0	0	0	0	1	1	0	1	0	1	0	1	0	0	0	0	0	62	Good	Enumerator 4
NC2025-0370	Valid Samples	2025-08-10	Nanchang Railway Station	Male	45–59years	Bachelor's degree	Visitors from Other Cities in Jiangxi Province	High-Speed Rail / Train	Traveling with Partner	0	2–3 Days	Very Concerned	Yes	0	1	0	0	0	0	0	0	0	0	1	0	0	0	0	0	0	0	0	0	0	0	65	Good	Enumerator 2
NC2025-0371	Valid Samples	2025-08-28	Nanchang Railway Station	Male	18–24years	Bachelor's degree	Visitors from Other Cities in Jiangxi Province	Long-Distance Bus	Traveling with Friends	0	1 Day	Moderately Concerned	Yes	0	0	1	0	0	0	0	0	0	1	0	1	1	0	0	0	1	0	0	1	0	0	27	Very unfavorable	Enumerator 2
NC2025-0372	Valid Samples	2025-07-18	Nanchang Railway Station	Female	45–59years	Bachelor's degree	Visitors from Other Cities in Jiangxi Province	Long-Distance Bus	Group Tour	0	1 Day	Neutral	No	1	1	0	1	0	1	0	0	0	0	0	1	1	0	0	0	0	0	0	0	0	1	78	Very good	Enumerator 2
NC2025-0373	Valid Samples	2025-07-16	Nanchang Changbei International Airport	Male	35–44years	Associate degree	Visitors from Other Cities in Jiangxi Province	Airplane	Traveling with Partner	0	Less than Half a Day	Neutral	No	1	0	0	0	0	0	0	0	0	0	1	1	1	0	0	0	0	0	0	0	0	1	65	Good	Enumerator 3
NC2025-0374	Valid Samples	2025-07-12	Nanchang Changbei International Airport	Male	35–44years	Bachelor's degree	Visitors from Other Provinces in China	Airplane	Traveling with Family/Children	2	2–3 Days	Very Concerned	No	0	1	1	1	0	1	0	1	0	1	1	1	0	0	0	0	0	0	0	0	0	1	83	Excellent	Enumerator 4
NC2025-0375	Valid Samples	2025-07-13	Nanchang Changbei International Airport	Female	18–24years	Bachelor's degree	Local Visitors from Nanchang	Airplane	Traveling with Family/Children	0	2–3 Days	Moderately Concerned	Yes	1	1	0	1	0	0	1	0	0	1	0	0	1	0	0	0	0	0	0	0	1	0	88	Excellent	Enumerator 3
NC2025-0376	Valid Samples	2025-07-14	Nanchang West Railway Station	Female	≥60years	Associate degree	Visitors from Other Provinces in China	High-Speed Rail / Train	Traveling with Friends	0	2–3 Days	Moderately Concerned	No	0	0	0	0	0	1	0	0	0	1	0	0	0	0	0	0	0	0	0	0	0	1	78	Very good	Enumerator 2
NC2025-0377	Valid Samples	2025-08-04	Nanchang Changbei International Airport	Female	25–34years	High school or below	Visitors from Other Provinces in China	Airplane	Traveling with Friends	0	2–3 Days	Neutral	Yes	0	1	1	0	0	0	0	0	0	0	0	0	0	0	0	0	0	0	0	0	0	0	49	Marginal	Enumerator 4
NC2025-0378	Valid Samples	2025-08-01	Nanchang West Railway Station	Female	18–24years	Bachelor's degree	Local Visitors from Nanchang	High-Speed Rail / Train	Traveling with Family/Children	0	Less than Half a Day	Moderately Concerned	Yes	0	0	0	1	0	0	1	0	0	1	0	1	1	0	0	0	0	0	0	0	1	0	72	Very good	Enumerator 2
NC2025-0379	Valid Samples	2025-07-29	Nanchang West Railway Station	Female	25–34years	Associate degree	Visitors from Other Provinces in China	High-Speed Rail / Train	Traveling with Friends	0	1 Day	Moderately Concerned	No	1	1	0	0	0	0	0	0	0	1	0	1	0	0	0	1	0	0	0	0	0	1	76	Very good	Enumerator 2
NC2025-0380	Valid Samples	2025-07-12	Nanchang East Railway Station	Male	25–34years	High school or below	Local Visitors from Nanchang	Private Car	Traveling with Family/Children	0	2–3 Days	Slightly Concerned	Yes	1	0	0	0	0	0	1	0	0	0	0	0	1	0	0	0	1	0	0	0	0	0	54	Acceptable	Enumerator 3
NC2025-0381	Valid Samples	2025-06-30	Nanchang East Railway Station	Female	18–24years	Bachelor's degree	Visitors from Other Cities in Jiangxi Province	High-Speed Rail / Train	Traveling with Friends	0	Less than Half a Day	Very Concerned	Yes	0	0	0	0	1	0	0	0	0	1	0	1	0	1	0	1	1	0	0	0	0	0	64	Good	Enumerator 2
NC2025-0382	Valid Samples	2025-08-24	Nanchang Changbei International Airport	Male	18–24years	Bachelor's degree	Local Visitors from Nanchang	Airplane	Traveling with Partner	0	2–3 Days	Neutral	Yes	1	1	0	0	0	1	0	0	0	1	0	0	0	1	0	1	0	0	0	0	0	0	71	Very good	Enumerator 4
NC2025-0383	Valid Samples	2025-07-11	Nanchang West Railway Station	Male	35–44years	Bachelor's degree	Visitors from Other Cities in Jiangxi Province	Private Car	Traveling with Family/Children	0	2–3 Days	Moderately Concerned	Yes	1	0	1	1	1	1	0	0	0	1	0	1	1	0	0	0	0	1	0	0	0	0	69	Good	Enumerator 1
NC2025-0384	Valid Samples	2025-07-31	Nanchang Railway Station	Male	18–24years	Associate degree	Visitors from Other Cities in Jiangxi Province	Other	Traveling with Family/Children	0	1 Day	Moderately Concerned	No	1	1	0	1	0	0	1	0	1	1	0	0	1	0	0	0	0	0	0	0	0	1	40	Marginal	Enumerator 3
NC2025-0385	Valid Samples	2025-07-30	Nanchang East Railway Station	Female	18–24years	Associate degree	Visitors from Other Cities in Jiangxi Province	Local Public Transportation	Traveling Alone	0	2–3 Days	Moderately Concerned	Yes	1	1	1	0	0	0	0	0	0	0	0	1	1	0	0	0	0	1	1	0	0	0	67	Good	Enumerator 4
NC2025-0386	Valid Samples	2025-07-22	Nanchang Railway Station	Female	45–59years	Bachelor's degree	Visitors from Other Provinces in China	High-Speed Rail / Train	Traveling Alone	0	1 Day	Very Concerned	No	0	1	1	1	1	0	1	0	0	1	0	0	1	0	0	0	0	0	0	0	0	1	72	Very good	Enumerator 4
NC2025-0387	Valid Samples	2025-07-01	Nanchang Railway Station	Male	25–34years	Bachelor's degree	Visitors from Other Cities in Jiangxi Province	Private Car	Traveling with Friends	0	4–7 Days	Very Concerned	Yes	0	0	1	1	1	0	0	0	0	1	0	1	0	0	0	0	1	0	0	0	0	0	68	Good	Enumerator 4
NC2025-0388	Valid Samples	2025-07-31	Nanchang East Railway Station	Male	35–44years	Master's degree or above	Visitors from Other Provinces in China	High-Speed Rail / Train	Traveling with Family/Children	0	1 Day	Very Concerned	Yes	1	0	0	0	1	1	0	0	0	1	1	1	1	0	0	1	0	1	1	1	0	0	56	Acceptable	Enumerator 4
NC2025-0389	Valid Samples	2025-07-10	Nanchang West Railway Station	Female	45–59years	Bachelor's degree	Visitors from Other Provinces in China	Private Car	Traveling with Family/Children	0	1 Day	Moderately Concerned	No	1	0	0	1	0	1	0	0	0	1	1	0	1	0	0	0	0	0	0	0	0	1	70	Very good	Enumerator 4
NC2025-0390	Valid Samples	2025-08-03	Nanchang South Railway Station	Male	35–44years	High school or below	Visitors from Other Provinces in China	High-Speed Rail / Train	Traveling with Family/Children	0	2–3 Days	Very Concerned	Yes	1	1	0	0	1	0	0	0	0	0	0	0	0	0	0	0	0	0	0	0	0	0	54	Acceptable	Enumerator 1
NC2025-0391	Valid Samples	2025-07-04	Nanchang West Railway Station	Female	35–44years	Associate degree	Visitors from Other Provinces in China	High-Speed Rail / Train	Group Tour	0	1 Day	Neutral	Yes	1	1	1	1	1	0	0	0	0	0	0	1	0	1	0	1	0	0	0	0	0	0	36	nfavorable	Enumerator 3
NC2025-0392	Valid Samples	2025-07-22	Nanchang East Railway Station	Female	35–44years	Associate degree	Visitors from Other Provinces in China	High-Speed Rail / Train	Traveling Alone	1	2–3 Days	Very Concerned	Yes	1	1	0	0	1	1	0	0	0	1	0	1	1	0	0	0	1	0	0	0	0	0	71	Very good	Enumerator 1
NC2025-0393	Valid Samples	2025-07-11	Nanchang Railway Station	Male	≥60years	Master's degree or above	Visitors from Other Provinces in China	High-Speed Rail / Train	Traveling with Partner	0	2–3 Days	Moderately Concerned	No	0	1	1	0	0	1	0	0	0	0	0	1	1	0	0	1	0	0	0	0	0	1	59	Acceptable	Enumerator 2
NC2025-0394	Valid Samples	2025-08-28	Nanchang East Railway Station	Female	35–44years	Bachelor's degree	Visitors from Hong Kong, Macao, Taiwan, and Overseas	High-Speed Rail / Train	Traveling with Friends	0	2–3 Days	Slightly Concerned	No	1	0	1	0	0	0	0	0	0	1	0	0	1	0	0	0	0	0	0	0	0	1	65	Good	Enumerator 2
NC2025-0396	Valid Samples	2025-07-31	Nanchang Changbei International Airport	Female	35–44years	Bachelor's degree	Visitors from Other Provinces in China	Airplane	Traveling with Family/Children	0	2–3 Days	Neutral	No	1	0	0	0	1	1	0	1	0	0	0	1	0	0	0	1	0	0	0	0	0	1	67	Good	Enumerator 1
NC2025-0398	Valid Samples	2025-06-30	Nanchang Railway Station	Male	18–24years	Master's degree or above	Visitors from Other Provinces in China	High-Speed Rail / Train	Traveling with Family/Children	3	2–3 Days	Moderately Concerned	Yes	1	1	1	1	0	0	0	0	0	1	0	1	1	0	0	0	0	0	1	0	0	0	71	Very good	Enumerator 3
NC2025-0399	Valid Samples	2025-08-27	Nanchang Changbei International Airport	Male	45–59years	Bachelor's degree	Local Visitors from Nanchang	Airplane	Traveling with Friends	0	2–3 Days	Moderately Concerned	No	1	1	0	0	0	1	0	0	0	1	1	0	0	0	0	1	0	0	0	0	0	1	57	Acceptable	Enumerator 1
NC2025-0400	Valid Samples	2025-07-29	Nanchang South Railway Station	Female	18–24years	Master's degree or above	Visitors from Other Provinces in China	High-Speed Rail / Train	Traveling with Friends	0	1 Day	Moderately Concerned	Yes	1	1	1	0	0	0	0	0	0	1	0	0	0	0	0	1	0	0	0	0	0	0	61	Good	Enumerator 2
NC2025-0401	Valid Samples	2025-07-11	Nanchang West Railway Station	Female	25–34years	Associate degree	Visitors from Other Cities in Jiangxi Province	Local Public Transportation	Traveling with Family/Children	0	More than 7 Days	Neutral	No	1	1	1	0	1	0	0	0	0	0	0	0	0	0	0	1	0	0	0	0	0	1	56	Acceptable	Enumerator 3
NC2025-0402	Valid Samples	2025-08-26	Nanchang Changbei International Airport	Other / Prefer not to say	25–34years	Bachelor's degree	Visitors from Other Provinces in China	Airplane	Traveling with Partner	0	2–3 Days	Moderately Concerned	Yes	0	0	1	0	0	0	0	0	0	0	1	0	0	0	0	0	0	0	1	0	0	0	43	Marginal	Enumerator 2
NC2025-0403	Valid Samples	2025-07-23	Nanchang East Railway Station	Female	25–34years	High school or below	Visitors from Hong Kong, Macao, Taiwan, and Overseas	High-Speed Rail / Train	Group Tour	0	2–3 Days	Moderately Concerned	Yes	1	0	0	1	0	1	0	0	0	1	0	1	1	0	0	0	0	0	0	0	0	0	55	Acceptable	Enumerator 1
NC2025-0404	Valid Samples	2025-06-30	Nanchang West Railway Station	Female	18–24years	High school or below	Visitors from Other Provinces in China	Private Car	Group Tour	0	1 Day	Moderately Concerned	Yes	0	0	0	0	1	0	1	0	0	1	1	1	0	0	0	0	1	0	0	0	0	0	96	Ideal	Enumerator 4
NC2025-0405	Valid Samples	2025-07-27	Nanchang West Railway Station	Male	35–44years	Associate degree	Local Visitors from Nanchang	Private Car	Traveling with Family/Children	0	Less than Half a Day	Moderately Concerned	No	1	1	0	0	0	0	0	0	0	1	0	1	1	0	0	0	0	0	0	0	0	1	81	Excellent	Enumerator 2
NC2025-0406	Valid Samples	2025-08-25	Nanchang East Railway Station	Female	25–34years	Master's degree or above	Visitors from Other Provinces in China	Private Car	Traveling with Family/Children	0	2–3 Days	Very Concerned	No	1	0	0	0	0	0	0	0	0	1	1	0	0	0	0	0	0	0	0	0	0	1	69	Good	Enumerator 1
NC2025-0407	Valid Samples	2025-06-30	Nanchang Changbei International Airport	Male	≥60years	Associate degree	Visitors from Other Cities in Jiangxi Province	Airplane	Traveling with Partner	0	1 Day	Moderately Concerned	No	1	1	1	0	1	1	0	0	0	1	0	0	1	0	0	0	0	0	0	0	0	1	76	Very good	Enumerator 1
NC2025-0408	Valid Samples	2025-07-23	Nanchang Changbei International Airport	Male	18–24years	Bachelor's degree	Visitors from Other Provinces in China	Airplane	Traveling with Family/Children	0	4–7 Days	Moderately Concerned	No	1	1	1	1	0	0	0	0	0	1	0	0	1	0	0	1	0	0	0	0	0	1	69	Good	Enumerator 4
NC2025-0409	Valid Samples	2025-07-04	Nanchang West Railway Station	Female	35–44years	Bachelor's degree	Visitors from Other Provinces in China	Private Car	Traveling with Family/Children	1	1 Day	Neutral	No	1	0	0	0	0	0	0	0	0	1	0	0	0	0	0	0	0	0	0	0	0	1	75	Very good	Enumerator 1
NC2025-0410	Valid Samples	2025-07-02	Nanchang Railway Station	Female	18–24years	Associate degree	Local Visitors from Nanchang	High-Speed Rail / Train	Traveling Alone	0	1 Day	Very Concerned	No	0	1	1	1	0	0	0	0	0	0	0	1	0	0	0	0	0	0	0	0	0	1	50	Acceptable	Enumerator 1
NC2025-0411	Valid Samples	2025-07-04	Nanchang Railway Station	Female	25–34years	Associate degree	Visitors from Other Provinces in China	Long-Distance Bus	Traveling with Family/Children	0	Less than Half a Day	Neutral	Yes	0	1	1	0	0	1	0	0	0	1	1	0	0	0	0	0	0	0	0	0	0	0	76	Very good	Enumerator 3
NC2025-0412	Valid Samples	2025-08-08	Nanchang Changbei International Airport	Male	25–34years	Bachelor's degree	Visitors from Other Provinces in China	Airplane	Traveling with Friends	0	1 Day	Neutral	No	1	0	1	0	1	0	0	0	0	0	0	1	0	1	0	0	0	0	0	0	0	1	68	Good	Enumerator 4
NC2025-0413	Valid Samples	2025-07-29	Nanchang West Railway Station	Female	18–24years	High school or below	Local Visitors from Nanchang	Private Car	Traveling with Partner	0	2–3 Days	Moderately Concerned	No	0	0	0	0	0	0	0	0	0	1	0	1	1	0	0	0	0	0	0	0	0	1	83	Excellent	Enumerator 3
NC2025-0414	Valid Samples	2025-08-19	Nanchang Railway Station	Male	25–34years	Bachelor's degree	Visitors from Other Provinces in China	High-Speed Rail / Train	Traveling with Family/Children	3	2–3 Days	Very Concerned	No	1	0	0	0	0	0	0	0	0	1	0	0	0	0	1	0	0	0	0	0	0	1	53	Acceptable	Enumerator 3
NC2025-0415	Valid Samples	2025-07-31	Nanchang West Railway Station	Male	35–44years	Bachelor's degree	Visitors from Other Provinces in China	High-Speed Rail / Train	Traveling with Friends	0	2–3 Days	Moderately Concerned	Yes	1	0	0	0	0	1	0	0	0	0	0	1	0	1	0	1	1	0	0	0	0	0	73	Very good	Enumerator 3
NC2025-0416	Valid Samples	2025-07-22	Nanchang Changbei International Airport	Male	18–24years	High school or below	Local Visitors from Nanchang	Airplane	Traveling Alone	2	2–3 Days	Neutral	Yes	1	0	0	0	0	1	0	0	0	0	0	0	1	0	0	1	0	0	0	0	1	0	53	Acceptable	Enumerator 2
NC2025-0417	Valid Samples	2025-07-10	Nanchang Railway Station	Female	25–34years	Bachelor's degree	Visitors from Other Cities in Jiangxi Province	High-Speed Rail / Train	Traveling Alone	0	2–3 Days	Neutral	No	0	0	0	0	0	1	0	0	0	1	0	1	1	0	0	0	0	0	0	0	0	1	80	Excellent	Enumerator 2
NC2025-0418	Valid Samples	2025-07-06	Nanchang West Railway Station	Male	35–44years	Bachelor's degree	Visitors from Other Cities in Jiangxi Province	High-Speed Rail / Train	Traveling with Family/Children	0	2–3 Days	Moderately Concerned	Yes	0	0	1	0	0	1	0	0	0	0	0	0	0	0	0	0	0	0	0	1	0	0	75	Very good	Enumerator 1
NC2025-0419	Valid Samples	2025-08-05	Nanchang West Railway Station	Male	18–24years	High school or below	Visitors from Other Provinces in China	Local Public Transportation	Traveling with Family/Children	0	Less than Half a Day	Moderately Concerned	No	0	0	0	1	0	0	0	0	0	1	0	0	0	1	0	0	0	0	0	0	0	1	62	Good	Enumerator 4
NC2025-0421	Valid Samples	2025-08-11	Nanchang Changbei International Airport	Female	18–24years	Bachelor's degree	Local Visitors from Nanchang	Airplane	Traveling with Family/Children	1	1 Day	Moderately Concerned	Yes	0	1	1	0	0	1	0	0	0	0	0	0	0	0	0	0	0	1	0	0	0	0	45	Marginal	Enumerator 3
NC2025-0422	Valid Samples	2025-07-29	Nanchang South Railway Station	Male	45–59years	Associate degree	Visitors from Other Cities in Jiangxi Province	High-Speed Rail / Train	Group Tour	0	2–3 Days	Very Concerned	Yes	1	1	0	1	0	0	0	0	0	1	0	1	1	0	0	0	0	0	1	0	0	0	44	Marginal	Enumerator 4
NC2025-0423	Valid Samples	2025-08-09	Nanchang East Railway Station	Male	35–44years	Bachelor's degree	Visitors from Other Provinces in China	Private Car	Traveling with Partner	0	2–3 Days	Moderately Concerned	Yes	1	0	0	0	0	0	0	0	0	1	0	0	1	0	0	0	0	0	0	0	1	0	61	Good	Enumerator 3
NC2025-0424	Valid Samples	2025-08-22	Nanchang East Railway Station	Female	18–24years	Bachelor's degree	Visitors from Other Provinces in China	High-Speed Rail / Train	Traveling with Friends	0	1 Day	Very Concerned	No	1	0	0	1	0	1	1	0	0	1	0	1	0	0	0	1	0	0	0	0	0	1	63	Good	Enumerator 2
NC2025-0425	Valid Samples	2025-07-15	Nanchang East Railway Station	Female	25–34years	Associate degree	Local Visitors from Nanchang	Private Car	Traveling with Friends	0	2–3 Days	Moderately Concerned	Yes	1	1	1	0	1	0	0	0	0	0	1	1	1	0	0	0	0	0	0	1	0	0	75	Very good	Enumerator 2
NC2025-0426	Valid Samples	2025-07-14	Nanchang East Railway Station	Male	18–24years	Master's degree or above	Local Visitors from Nanchang	High-Speed Rail / Train	Traveling with Friends	0	1 Day	Moderately Concerned	No	1	1	0	0	0	1	0	0	0	0	0	1	1	0	0	0	0	0	0	0	0	1	64	Good	Enumerator 4
NC2025-0428	Valid Samples	2025-07-31	Nanchang Changbei International Airport	Female	45–59years	Bachelor's degree	Visitors from Other Cities in Jiangxi Province	Private Car	Traveling with Friends	1	2–3 Days	Neutral	No	0	0	1	0	1	1	1	0	0	1	1	0	0	0	0	0	0	0	0	0	0	1	68	Good	Enumerator 2
NC2025-0429	Valid Samples	2025-08-17	Nanchang Railway Station	Female	45–59years	Associate degree	Visitors from Other Provinces in China	High-Speed Rail / Train	Traveling with Family/Children	0	2–3 Days	Moderately Concerned	No	0	1	1	1	0	0	1	0	0	1	0	0	0	0	0	0	0	0	0	0	0	1	74	Very good	Enumerator 4
NC2025-0431	Valid Samples	2025-07-22	Nanchang Railway Station	Male	18–24years	Master's degree or above	Visitors from Other Provinces in China	High-Speed Rail / Train	Traveling with Family/Children	0	4–7 Days	Neutral	No	0	1	1	0	0	0	1	0	0	1	1	0	1	0	0	0	0	0	0	0	0	1	37	nfavorable	Enumerator 2
NC2025-0432	Valid Samples	2025-07-06	Nanchang Changbei International Airport	Female	18–24years	Associate degree	Visitors from Other Provinces in China	Private Car	Traveling with Partner	0	1 Day	Moderately Concerned	No	1	1	0	0	0	0	0	0	0	0	0	1	0	1	0	0	0	0	0	0	0	1	82	Excellent	Enumerator 3
NC2025-0433	Valid Samples	2025-07-24	Nanchang East Railway Station	Female	18–24years	Master's degree or above	Visitors from Other Cities in Jiangxi Province	High-Speed Rail / Train	Traveling with Friends	0	1 Day	Moderately Concerned	Yes	0	1	0	0	0	1	0	0	0	0	0	1	1	0	0	0	0	0	0	0	0	0	54	Acceptable	Enumerator 4
NC2025-0434	Valid Samples	2025-07-13	Nanchang Changbei International Airport	Male	18–24years	Associate degree	Visitors from Other Provinces in China	Airplane	Group Tour	0	Less than Half a Day	Moderately Concerned	No	0	1	1	1	1	1	1	0	0	1	1	1	0	0	0	0	0	0	0	0	0	1	74	Very good	Enumerator 2
NC2025-0437	Valid Samples	2025-08-19	Nanchang South Railway Station	Male	25–34years	High school or below	Visitors from Other Provinces in China	High-Speed Rail / Train	Traveling with Friends	0	2–3 Days	Very Concerned	Yes	0	0	1	0	1	1	0	0	0	1	0	1	1	0	0	0	0	0	0	0	0	0	64	Good	Enumerator 2
NC2025-0438	Valid Samples	2025-08-07	Nanchang Changbei International Airport	Female	25–34years	Master's degree or above	Visitors from Other Cities in Jiangxi Province	Airplane	Traveling with Family/Children	0	2–3 Days	Neutral	No	1	0	1	0	1	0	0	0	0	0	1	0	1	0	0	0	0	0	0	0	0	1	78	Very good	Enumerator 4
NC2025-0439	Valid Samples	2025-08-23	Nanchang Changbei International Airport	Female	25–34years	Bachelor's degree	Visitors from Other Provinces in China	Airplane	Traveling with Friends	3	Less than Half a Day	Moderately Concerned	Yes	1	0	0	0	1	1	1	0	0	0	1	0	0	0	0	0	0	0	0	1	0	0	70	Very good	Enumerator 4
NC2025-0440	Valid Samples	2025-07-12	Nanchang East Railway Station	Male	18–24years	Associate degree	Visitors from Other Provinces in China	High-Speed Rail / Train	Traveling Alone	0	2–3 Days	Moderately Concerned	Yes	0	0	0	0	0	0	0	0	0	0	0	0	1	1	0	1	0	0	0	0	0	0	56	Acceptable	Enumerator 2
NC2025-0441	Valid Samples	2025-07-11	Nanchang Changbei International Airport	Male	18–24years	High school or below	Visitors from Other Cities in Jiangxi Province	Airplane	Traveling with Family/Children	1	2–3 Days	Moderately Concerned	No	1	0	0	0	0	1	0	0	0	1	1	1	0	0	0	0	0	0	0	0	0	1	54	Acceptable	Enumerator 3
NC2025-0442	Valid Samples	2025-08-27	Nanchang West Railway Station	Female	18–24years	Master's degree or above	Local Visitors from Nanchang	Private Car	Group Tour	0	1 Day	Moderately Concerned	No	0	1	0	1	0	0	0	0	0	0	0	1	0	0	0	1	0	0	0	0	0	1	63	Good	Enumerator 1
NC2025-0443	Valid Samples	2025-08-10	Nanchang Changbei International Airport	Female	18–24years	High school or below	Visitors from Other Provinces in China	Private Car	Traveling with Friends	0	1 Day	Slightly Concerned	No	1	0	1	0	0	0	0	0	0	1	1	0	1	0	0	0	0	0	0	0	0	1	72	Very good	Enumerator 1
NC2025-0444	Valid Samples	2025-07-31	Nanchang West Railway Station	Male	45–59years	Bachelor's degree	Visitors from Other Provinces in China	Private Car	Traveling Alone	0	4–7 Days	Very Concerned	No	1	0	0	1	0	0	0	0	0	1	1	1	1	1	0	0	0	0	0	0	0	1	80	Excellent	Enumerator 3
NC2025-0445	Valid Samples	2025-07-21	Nanchang West Railway Station	Male	45–59years	Bachelor's degree	Visitors from Other Cities in Jiangxi Province	Long-Distance Bus	Traveling Alone	2	1 Day	Moderately Concerned	Yes	0	0	0	0	0	0	0	0	0	1	0	1	1	0	0	0	0	0	1	0	0	0	61	Good	Enumerator 4
NC2025-0446	Valid Samples	2025-08-11	Nanchang Railway Station	Female	25–34years	Master's degree or above	Visitors from Other Provinces in China	High-Speed Rail / Train	Traveling with Family/Children	0	2–3 Days	Neutral	No	1	0	0	0	1	1	0	0	0	1	0	1	0	0	1	0	0	0	0	0	0	1	59	Acceptable	Enumerator 1
NC2025-0447	Valid Samples	2025-08-30	Nanchang South Railway Station	Female	25–34years	Bachelor's degree	Visitors from Other Provinces in China	High-Speed Rail / Train	Traveling with Friends	2	2–3 Days	Slightly Concerned	Yes	0	1	1	1	1	1	0	0	0	1	0	1	0	0	1	1	1	1	1	0	0	0	68	Good	Enumerator 2
NC2025-0448	Valid Samples	2025-07-22	Nanchang South Railway Station	Male	25–34years	High school or below	Local Visitors from Nanchang	High-Speed Rail / Train	Traveling with Friends	0	2–3 Days	Very Concerned	No	1	1	0	0	1	1	0	0	0	1	1	1	1	0	0	0	0	0	0	0	0	1	64	Good	Enumerator 4
NC2025-0449	Valid Samples	2025-08-27	Nanchang West Railway Station	Male	25–34years	Bachelor's degree	Visitors from Other Cities in Jiangxi Province	Long-Distance Bus	Traveling Alone	1	2–3 Days	Neutral	No	0	1	0	1	1	1	1	0	0	0	1	1	0	1	0	0	0	0	0	0	0	1	79	Very good	Enumerator 1
NC2025-0450	Valid Samples	2025-07-31	Nanchang East Railway Station	Female	45–59years	Associate degree	Visitors from Other Provinces in China	High-Speed Rail / Train	Traveling with Partner	2	2–3 Days	Moderately Concerned	No	0	0	1	0	0	0	0	1	0	1	0	1	1	0	1	0	0	0	0	0	0	1	74	Very good	Enumerator 4
NC2025-0451	Valid Samples	2025-07-27	Nanchang Railway Station	Male	18–24years	Associate degree	Visitors from Other Cities in Jiangxi Province	Long-Distance Bus	Traveling with Partner	0	1 Day	Very Concerned	No	0	0	1	0	0	1	0	0	0	0	0	1	1	0	0	1	0	0	0	0	0	1	86	Excellent	Enumerator 2
NC2025-0452	Valid Samples	2025-07-14	Nanchang Railway Station	Male	18–24years	High school or below	Visitors from Other Provinces in China	High-Speed Rail / Train	Traveling with Friends	0	1 Day	Slightly Concerned	No	0	0	1	1	0	1	1	0	0	0	0	1	1	0	0	1	0	0	0	0	0	1	60	Good	Enumerator 1
NC2025-0453	Valid Samples	2025-07-25	Nanchang Changbei International Airport	Male	45–59years	Bachelor's degree	Visitors from Other Provinces in China	Airplane	Traveling with Family/Children	0	1 Day	Very Concerned	Yes	1	0	1	0	1	1	0	0	0	0	1	0	0	0	0	0	0	1	0	0	0	0	52	Acceptable	Enumerator 2
NC2025-0454	Valid Samples	2025-07-09	Nanchang Changbei International Airport	Male	25–34years	Associate degree	Local Visitors from Nanchang	Airplane	Traveling Alone	0	1 Day	Very Concerned	Yes	1	0	0	1	0	1	0	0	0	1	0	1	1	0	0	0	0	0	1	0	0	0	64	Good	Enumerator 3
NC2025-0455	Valid Samples	2025-08-11	Nanchang West Railway Station	Male	25–34years	Master's degree or above	Visitors from Hong Kong, Macao, Taiwan, and Overseas	High-Speed Rail / Train	Traveling with Partner	0	1 Day	Moderately Concerned	Yes	0	1	1	0	0	1	1	0	0	1	1	1	0	0	0	0	0	0	0	0	1	0	49	Marginal	Enumerator 1
NC2025-0456	Valid Samples	2025-07-17	Nanchang South Railway Station	Female	25–34years	Bachelor's degree	Visitors from Other Cities in Jiangxi Province	High-Speed Rail / Train	Traveling with Friends	0	1 Day	Neutral	Yes	0	0	1	0	0	0	1	0	0	0	0	1	1	1	0	0	1	0	0	0	0	0	68	Good	Enumerator 4
NC2025-0457	Valid Samples	2025-08-11	Nanchang Changbei International Airport	Male	25–34years	Bachelor's degree	Visitors from Other Provinces in China	Airplane	Traveling with Family/Children	4	1 Day	Very Concerned	No	1	0	1	0	1	0	0	0	1	1	1	0	1	0	0	0	0	0	0	0	0	1	68	Good	Enumerator 1
NC2025-0458	Valid Samples	2025-08-23	Nanchang Changbei International Airport	Male	25–34years	Bachelor's degree	Visitors from Hong Kong, Macao, Taiwan, and Overseas	Airplane	Traveling with Family/Children	0	1 Day	Neutral	Yes	1	0	1	1	0	0	0	0	0	1	0	1	0	0	0	0	1	0	0	1	0	0	78	Very good	Enumerator 3
NC2025-0459	Valid Samples	2025-08-01	Nanchang Changbei International Airport	Female	25–34years	Bachelor's degree	Visitors from Other Cities in Jiangxi Province	Private Car	Traveling with Partner	0	4–7 Days	Very Concerned	Yes	0	0	1	0	1	0	0	0	0	0	0	0	1	0	0	0	1	0	0	0	0	0	56	Acceptable	Enumerator 3
NC2025-0460	Valid Samples	2025-08-25	Nanchang East Railway Station	Male	25–34years	Master's degree or above	Visitors from Other Cities in Jiangxi Province	High-Speed Rail / Train	Traveling with Family/Children	1	2–3 Days	Very Concerned	Yes	0	1	0	0	1	1	0	0	0	1	0	1	0	0	0	0	0	0	0	0	0	0	77	Very good	Enumerator 1
NC2025-0461	Valid Samples	2025-08-28	Nanchang West Railway Station	Female	25–34years	Bachelor's degree	Visitors from Other Provinces in China	High-Speed Rail / Train	Traveling with Family/Children	0	2–3 Days	Very Concerned	No	1	1	1	0	0	0	1	0	0	1	1	0	0	0	0	0	0	0	0	0	0	1	77	Very good	Enumerator 1
NC2025-0462	Valid Samples	2025-07-01	Nanchang Changbei International Airport	Male	18–24years	Bachelor's degree	Visitors from Other Cities in Jiangxi Province	Airplane	Traveling with Friends	0	4–7 Days	Neutral	Yes	1	1	0	0	1	1	0	0	0	0	0	1	0	0	0	1	1	0	0	0	0	0	60	Good	Enumerator 3
NC2025-0463	Valid Samples	2025-07-18	Nanchang Railway Station	Female	18–24years	High school or below	Visitors from Other Cities in Jiangxi Province	High-Speed Rail / Train	Traveling Alone	0	1 Day	Moderately Concerned	Yes	1	1	1	0	0	0	0	0	0	1	0	0	1	0	0	0	1	1	0	0	0	0	69	Good	Enumerator 4
NC2025-0464	Valid Samples	2025-07-29	Nanchang Railway Station	Male	25–34years	Bachelor's degree	Visitors from Other Provinces in China	High-Speed Rail / Train	Traveling with Family/Children	0	1 Day	Very Concerned	No	1	1	0	0	1	1	0	0	0	0	1	1	0	1	0	1	0	0	0	0	0	1	60	Good	Enumerator 3
NC2025-0465	Valid Samples	2025-07-02	Nanchang Changbei International Airport	Female	18–24years	Bachelor's degree	Visitors from Other Cities in Jiangxi Province	Private Car	Traveling with Family/Children	0	4–7 Days	Slightly Concerned	No	0	1	0	0	1	1	0	0	0	1	0	1	1	1	0	0	0	0	0	0	0	1	65	Good	Enumerator 4
NC2025-0466	Valid Samples	2025-07-16	Nanchang Railway Station	Female	18–24years	Associate degree	Visitors from Hong Kong, Macao, Taiwan, and Overseas	High-Speed Rail / Train	Traveling with Friends	1	2–3 Days	Very Concerned	No	1	1	0	0	0	0	0	0	0	1	0	0	0	0	0	1	0	0	0	0	0	1	56	Acceptable	Enumerator 3
NC2025-0467	Valid Samples	2025-07-02	Nanchang South Railway Station	Male	35–44years	Associate degree	Visitors from Other Provinces in China	High-Speed Rail / Train	Traveling with Partner	0	2–3 Days	Moderately Concerned	No	1	1	1	0	1	0	1	0	0	0	0	0	1	0	0	0	0	0	0	0	0	1	56	Acceptable	Enumerator 4
NC2025-0468	Valid Samples	2025-07-16	Nanchang East Railway Station	Male	45–59years	Bachelor's degree	Visitors from Other Provinces in China	Private Car	Traveling Alone	0	2–3 Days	Moderately Concerned	No	0	1	1	1	0	0	0	0	0	1	1	0	0	0	0	0	0	0	0	0	0	1	73	Very good	Enumerator 4
NC2025-0469	Valid Samples	2025-08-18	Nanchang Changbei International Airport	Male	25–34years	Associate degree	Visitors from Other Provinces in China	Private Car	Group Tour	2	1 Day	Neutral	No	1	1	0	0	0	1	0	0	0	0	0	1	1	1	0	0	0	0	0	0	0	1	59	Acceptable	Enumerator 3
NC2025-0470	Valid Samples	2025-07-19	Nanchang West Railway Station	Male	18–24years	High school or below	Visitors from Other Cities in Jiangxi Province	High-Speed Rail / Train	Traveling with Family/Children	1	2–3 Days	Very Concerned	No	0	1	0	0	0	0	0	0	0	1	1	1	1	0	0	0	0	0	0	0	0	1	76	Very good	Enumerator 3
NC2025-0471	Valid Samples	2025-07-28	Nanchang Changbei International Airport	Male	25–34years	Master's degree or above	Visitors from Other Provinces in China	Private Car	Traveling with Partner	0	2–3 Days	Very Concerned	No	0	1	0	0	0	1	1	0	0	1	0	0	0	0	0	0	0	0	0	0	0	1	68	Good	Enumerator 2
NC2025-0472	Valid Samples	2025-07-25	Nanchang Changbei International Airport	Female	18–24years	Master's degree or above	Visitors from Other Provinces in China	Airplane	Traveling with Partner	0	4–7 Days	Slightly Concerned	No	1	1	0	1	0	1	0	0	0	0	0	0	1	0	0	0	0	0	0	0	0	1	63	Good	Enumerator 3
NC2025-0473	Valid Samples	2025-07-24	Nanchang Railway Station	Female	18–24years	Bachelor's degree	Visitors from Other Provinces in China	Local Public Transportation	Group Tour	0	1 Day	Moderately Concerned	No	1	0	0	0	1	1	0	0	0	0	0	1	0	0	0	0	0	0	0	0	0	1	57	Acceptable	Enumerator 3
NC2025-0474	Valid Samples	2025-07-11	Nanchang West Railway Station	Female	45–59years	Master's degree or above	Visitors from Other Provinces in China	Private Car	Traveling with Friends	0	1 Day	Moderately Concerned	Yes	1	0	0	0	1	1	0	0	0	1	0	1	0	0	0	0	0	0	1	0	0	0	59	Acceptable	Enumerator 3
NC2025-0475	Valid Samples	2025-07-26	Nanchang East Railway Station	Female	45–59years	Associate degree	Visitors from Other Provinces in China	High-Speed Rail / Train	Traveling with Friends	0	Less than Half a Day	Neutral	No	1	1	0	0	1	0	0	0	0	1	0	1	0	0	0	0	0	0	0	0	0	1	65	Good	Enumerator 1
NC2025-0476	Valid Samples	2025-07-20	Nanchang Railway Station	Female	18–24years	High school or below	Visitors from Other Cities in Jiangxi Province	High-Speed Rail / Train	Traveling Alone	0	1 Day	Neutral	No	0	1	0	0	0	0	0	0	0	0	0	0	0	1	0	0	0	0	0	0	0	1	86	Excellent	Enumerator 2
NC2025-0477	Valid Samples	2025-08-17	Nanchang Railway Station	Female	18–24years	Bachelor's degree	Visitors from Other Provinces in China	High-Speed Rail / Train	Traveling with Partner	0	2–3 Days	Moderately Concerned	No	1	1	1	1	0	1	0	1	0	0	0	1	0	0	0	0	0	0	0	0	0	1	70	Very good	Enumerator 3
NC2025-0479	Valid Samples	2025-07-08	Nanchang Changbei International Airport	Male	25–34years	Bachelor's degree	Local Visitors from Nanchang	Private Car	Traveling Alone	1	1 Day	Moderately Concerned	Yes	1	1	1	0	0	0	0	0	0	0	1	1	1	0	0	0	1	0	0	0	0	0	61	Good	Enumerator 4
NC2025-0480	Valid Samples	2025-08-29	Nanchang West Railway Station	Female	35–44years	Bachelor's degree	Visitors from Other Cities in Jiangxi Province	Private Car	Traveling with Family/Children	0	4–7 Days	Moderately Concerned	Yes	1	0	0	1	0	1	0	0	0	0	0	1	0	0	0	0	0	0	1	0	0	0	66	Good	Enumerator 4
NC2025-0481	Valid Samples	2025-07-10	Nanchang Railway Station	Male	18–24years	Master's degree or above	Visitors from Other Cities in Jiangxi Province	High-Speed Rail / Train	Traveling with Partner	2	2–3 Days	Slightly Concerned	Yes	1	1	0	0	0	0	0	0	0	1	1	1	1	0	0	0	0	0	0	0	0	0	63	Good	Enumerator 2
NC2025-0482	Valid Samples	2025-08-05	Nanchang Changbei International Airport	Female	25–34years	High school or below	Local Visitors from Nanchang	Airplane	Group Tour	0	2–3 Days	Moderately Concerned	Yes	0	1	0	0	0	0	0	0	0	1	0	0	1	0	0	0	0	1	0	0	0	0	62	Good	Enumerator 1
NC2025-0483	Valid Samples	2025-07-01	Nanchang Changbei International Airport	Female	25–34years	High school or below	Visitors from Other Provinces in China	Airplane	Traveling Alone	2	2–3 Days	Very Concerned	No	1	0	0	0	0	0	0	0	0	1	0	0	0	1	0	0	0	0	0	0	0	1	81	Excellent	Enumerator 3
NC2025-0484	Valid Samples	2025-08-15	Nanchang Railway Station	Male	35–44years	Associate degree	Local Visitors from Nanchang	High-Speed Rail / Train	Traveling with Partner	2	2–3 Days	Very Concerned	Yes	1	0	1	0	0	0	1	0	0	0	1	0	0	1	0	0	0	1	0	0	0	0	74	Very good	Enumerator 2
NC2025-0485	Valid Samples	2025-08-06	Nanchang South Railway Station	Male	35–44years	Bachelor's degree	Visitors from Other Provinces in China	High-Speed Rail / Train	Traveling Alone	0	Less than Half a Day	Neutral	No	1	0	1	0	0	1	0	0	0	1	0	0	1	0	0	0	0	0	0	0	0	1	84	Excellent	Enumerator 1
NC2025-0486	Valid Samples	2025-08-19	Nanchang Railway Station	Female	25–34years	Master's degree or above	Visitors from Other Cities in Jiangxi Province	Private Car	Traveling with Partner	0	1 Day	Moderately Concerned	No	1	0	0	0	1	0	0	1	0	1	0	0	1	0	1	1	0	0	0	0	0	1	62	Good	Enumerator 4
NC2025-0487	Valid Samples	2025-08-01	Nanchang South Railway Station	Male	18–24years	Bachelor's degree	Visitors from Other Cities in Jiangxi Province	High-Speed Rail / Train	Traveling with Family/Children	0	2–3 Days	Moderately Concerned	Yes	1	0	0	0	0	1	0	0	0	1	0	0	0	1	0	0	0	1	0	0	0	0	88	Excellent	Enumerator 3
NC2025-0488	Valid Samples	2025-07-10	Nanchang East Railway Station	Female	25–34years	Master's degree or above	Visitors from Other Provinces in China	Private Car	Traveling with Friends	0	More than 7 Days	Moderately Concerned	No	1	0	1	0	1	0	1	0	0	1	0	1	1	0	0	0	0	0	0	0	0	1	79	Very good	Enumerator 1
NC2025-0489	Valid Samples	2025-08-24	Nanchang East Railway Station	Female	25–34years	Bachelor's degree	Visitors from Other Provinces in China	High-Speed Rail / Train	Group Tour	0	2–3 Days	Not Concerned at All	No	1	1	0	1	0	1	0	0	0	0	0	0	0	1	0	0	0	0	0	0	0	1	70	Very good	Enumerator 1
NC2025-0490	Valid Samples	2025-08-11	Nanchang East Railway Station	Female	25–34years	Master's degree or above	Visitors from Other Provinces in China	High-Speed Rail / Train	Group Tour	0	1 Day	Neutral	Yes	1	0	0	0	0	0	0	0	0	0	0	1	1	1	0	0	0	1	1	0	0	0	58	Acceptable	Enumerator 3
NC2025-0491	Valid Samples	2025-07-21	Nanchang Changbei International Airport	Female	35–44years	Bachelor's degree	Visitors from Other Provinces in China	Airplane	Traveling Alone	0	Less than Half a Day	Moderately Concerned	No	1	1	1	1	0	1	0	0	0	1	1	1	0	0	0	0	0	0	0	0	0	1	49	Marginal	Enumerator 4
NC2025-0492	Valid Samples	2025-07-20	Nanchang South Railway Station	Female	35–44years	High school or below	Visitors from Other Provinces in China	High-Speed Rail / Train	Traveling with Friends	1	4–7 Days	Moderately Concerned	No	0	0	0	0	0	1	0	0	0	1	1	0	0	1	0	0	0	0	0	0	0	1	76	Very good	Enumerator 2
NC2025-0494	Valid Samples	2025-08-18	Nanchang West Railway Station	Female	25–34years	Master's degree or above	Visitors from Other Cities in Jiangxi Province	Long-Distance Bus	Traveling with Friends	0	2–3 Days	Moderately Concerned	No	1	0	1	0	1	0	0	0	0	0	0	1	0	0	0	1	0	0	0	0	0	1	72	Very good	Enumerator 3
NC2025-0495	Valid Samples	2025-07-24	Nanchang Railway Station	Female	18–24years	Bachelor's degree	Visitors from Other Provinces in China	High-Speed Rail / Train	Traveling with Friends	0	4–7 Days	Moderately Concerned	No	1	1	0	0	0	1	1	0	0	1	0	0	0	0	0	0	0	0	0	0	0	1	85	Excellent	Enumerator 4
NC2025-0496	Valid Samples	2025-07-14	Nanchang Changbei International Airport	Male	35–44years	Bachelor's degree	Visitors from Other Provinces in China	Airplane	Traveling with Partner	1	1 Day	Very Concerned	Yes	0	0	0	1	0	1	0	0	0	0	0	0	0	0	0	1	0	0	0	0	0	0	48	Marginal	Enumerator 3
NC2025-0497	Valid Samples	2025-07-21	Nanchang Changbei International Airport	Male	25–34years	Master's degree or above	Visitors from Other Cities in Jiangxi Province	Airplane	Traveling with Family/Children	0	2–3 Days	Moderately Concerned	No	0	1	0	0	0	1	0	0	0	0	0	1	1	0	1	0	0	0	0	0	0	1	51	Acceptable	Enumerator 3
NC2025-0498	Valid Samples	2025-07-23	Nanchang East Railway Station	Female	≥60years	Bachelor's degree	Visitors from Other Provinces in China	High-Speed Rail / Train	Traveling with Family/Children	0	2–3 Days	Moderately Concerned	No	1	0	0	0	0	0	1	0	0	0	1	1	1	0	0	0	0	0	0	0	0	1	83	Excellent	Enumerator 1
NC2025-0499	Valid Samples	2025-08-20	Nanchang Changbei International Airport	Female	18–24years	Bachelor's degree	Visitors from Other Cities in Jiangxi Province	Airplane	Traveling with Friends	0	2–3 Days	Moderately Concerned	Yes	1	0	0	1	1	1	0	1	1	1	1	0	0	0	0	1	1	0	0	0	0	0	68	Good	Enumerator 3
NC2025-0500	Valid Samples	2025-08-20	Nanchang South Railway Station	Female	35–44years	High school or below	Visitors from Other Cities in Jiangxi Province	High-Speed Rail / Train	Traveling with Friends	0	4–7 Days	Moderately Concerned	No	0	0	0	0	0	0	0	0	0	0	0	1	0	0	0	0	0	0	0	0	0	1	55	Acceptable	Enumerator 4
NC2025-0501	Valid Samples	2025-08-07	Nanchang West Railway Station	Male	18–24years	Bachelor's degree	Visitors from Other Provinces in China	High-Speed Rail / Train	Traveling with Partner	1	Less than Half a Day	Very Concerned	Yes	1	0	0	1	0	0	0	0	0	1	0	1	0	1	0	0	0	0	1	1	0	0	66	Good	Enumerator 4
NC2025-0502	Valid Samples	2025-08-29	Nanchang Changbei International Airport	Female	35–44years	High school or below	Visitors from Other Provinces in China	Airplane	Traveling with Family/Children	2	1 Day	Slightly Concerned	Yes	1	0	0	1	0	0	0	0	0	1	0	0	0	0	1	0	0	0	0	0	0	0	58	Acceptable	Enumerator 4
NC2025-0503	Valid Samples	2025-08-02	Nanchang Railway Station	Male	35–44years	High school or below	Visitors from Other Cities in Jiangxi Province	High-Speed Rail / Train	Traveling with Family/Children	0	2–3 Days	Moderately Concerned	No	1	1	1	0	0	0	0	0	0	1	1	0	1	0	0	1	0	0	0	0	0	1	62	Good	Enumerator 3
NC2025-0504	Valid Samples	2025-07-26	Nanchang West Railway Station	Male	35–44years	Associate degree	Visitors from Other Provinces in China	High-Speed Rail / Train	Traveling with Family/Children	0	1 Day	Moderately Concerned	Yes	1	1	1	0	1	0	0	0	0	1	0	1	0	0	1	0	0	1	0	1	0	0	78	Very good	Enumerator 2
NC2025-0505	Valid Samples	2025-08-10	Nanchang Railway Station	Male	18–24years	Bachelor's degree	Visitors from Other Cities in Jiangxi Province	High-Speed Rail / Train	Traveling with Friends	0	2–3 Days	Slightly Concerned	No	1	1	0	1	1	0	0	0	0	0	0	1	1	0	0	1	0	0	0	0	0	1	67	Good	Enumerator 2
NC2025-0506	Valid Samples	2025-07-02	Nanchang Changbei International Airport	Male	18–24years	High school or below	Visitors from Hong Kong, Macao, Taiwan, and Overseas	Airplane	Traveling with Friends	0	4–7 Days	Very Concerned	No	0	0	1	0	1	1	0	0	0	1	0	0	0	0	0	0	0	0	0	0	0	1	62	Good	Enumerator 3
NC2025-0507	Valid Samples	2025-07-18	Nanchang Railway Station	Female	25–34years	Master's degree or above	Visitors from Other Cities in Jiangxi Province	High-Speed Rail / Train	Traveling with Friends	1	2–3 Days	Moderately Concerned	No	0	0	1	0	1	1	0	0	0	0	0	1	0	1	0	0	0	0	0	0	0	1	71	Very good	Enumerator 1
NC2025-0508	Valid Samples	2025-08-28	Nanchang Changbei International Airport	Male	25–34years	Bachelor's degree	Visitors from Other Cities in Jiangxi Province	Airplane	Traveling Alone	2	2–3 Days	Moderately Concerned	Yes	0	1	1	1	0	1	1	0	0	1	0	1	0	0	0	0	0	1	0	0	0	0	58	Acceptable	Enumerator 1
NC2025-0509	Valid Samples	2025-07-14	Nanchang South Railway Station	Female	25–34years	Associate degree	Visitors from Other Provinces in China	High-Speed Rail / Train	Traveling with Friends	0	1 Day	Neutral	Yes	0	0	0	0	1	0	1	0	0	0	0	0	0	0	0	0	0	0	0	0	0	0	73	Very good	Enumerator 3
NC2025-0510	Valid Samples	2025-07-16	Nanchang West Railway Station	Female	45–59years	Bachelor's degree	Visitors from Other Provinces in China	High-Speed Rail / Train	Group Tour	0	1 Day	Neutral	Yes	1	1	1	1	0	0	0	0	0	1	1	0	0	0	0	0	1	0	0	0	0	0	74	Very good	Enumerator 3
NC2025-0511	Valid Samples	2025-08-14	Nanchang Changbei International Airport	Female	18–24years	Bachelor's degree	Visitors from Other Provinces in China	Airplane	Traveling with Friends	2	1 Day	Neutral	No	0	1	1	0	0	1	1	0	0	0	1	1	0	0	0	0	0	0	0	0	0	1	53	Acceptable	Enumerator 3
NC2025-0512	Valid Samples	2025-08-30	Nanchang Railway Station	Male	18–24years	Bachelor's degree	Visitors from Other Provinces in China	Long-Distance Bus	Group Tour	1	4–7 Days	Very Concerned	Yes	1	1	0	0	0	1	0	0	0	1	1	1	1	0	0	1	0	1	0	1	0	0	64	Good	Enumerator 2
NC2025-0513	Valid Samples	2025-07-22	Nanchang Railway Station	Male	35–44years	Bachelor's degree	Visitors from Other Cities in Jiangxi Province	Long-Distance Bus	Traveling with Family/Children	0	2–3 Days	Very Concerned	Yes	0	0	0	0	1	1	0	0	0	0	1	0	1	0	0	0	0	0	0	0	0	0	57	Acceptable	Enumerator 3
NC2025-0514	Valid Samples	2025-07-17	Nanchang West Railway Station	Female	35–44years	Bachelor's degree	Local Visitors from Nanchang	High-Speed Rail / Train	Traveling with Partner	0	4–7 Days	Moderately Concerned	Yes	1	0	0	1	0	0	0	0	0	1	0	0	1	0	0	1	1	0	0	0	0	0	62	Good	Enumerator 1
NC2025-0515	Valid Samples	2025-07-30	Nanchang Railway Station	Female	35–44years	Master's degree or above	Visitors from Other Provinces in China	High-Speed Rail / Train	Group Tour	0	2–3 Days	Moderately Concerned	No	1	1	0	0	1	1	0	0	0	0	1	0	1	0	0	0	0	0	0	0	0	1	77	Very good	Enumerator 4
NC2025-0516	Valid Samples	2025-07-25	Nanchang Railway Station	Male	18–24years	Bachelor's degree	Visitors from Other Cities in Jiangxi Province	High-Speed Rail / Train	Traveling with Partner	0	2–3 Days	Not Concerned at All	Yes	1	0	0	0	1	0	0	0	0	0	0	1	0	0	0	0	1	0	0	0	0	0	66	Good	Enumerator 1
NC2025-0517	Valid Samples	2025-08-10	Nanchang South Railway Station	Male	25–34years	Bachelor's degree	Visitors from Other Cities in Jiangxi Province	High-Speed Rail / Train	Traveling with Partner	0	2–3 Days	Moderately Concerned	No	1	1	0	0	0	1	0	0	0	0	0	0	0	0	0	1	0	0	0	0	0	1	81	Excellent	Enumerator 2
NC2025-0518	Valid Samples	2025-08-25	Nanchang South Railway Station	Female	≥60years	Associate degree	Visitors from Other Cities in Jiangxi Province	High-Speed Rail / Train	Traveling Alone	0	4–7 Days	Neutral	No	0	0	1	0	0	0	0	0	0	1	0	1	0	0	0	0	0	0	0	0	0	1	71	Very good	Enumerator 1
NC2025-0519	Valid Samples	2025-08-07	Nanchang Changbei International Airport	Female	18–24years	High school or below	Visitors from Other Provinces in China	Airplane	Traveling with Friends	4	2–3 Days	Moderately Concerned	No	1	0	0	0	1	0	0	1	0	0	1	1	1	0	0	0	0	0	0	0	0	1	63	Good	Enumerator 1
NC2025-0521	Valid Samples	2025-08-05	Nanchang Changbei International Airport	Female	35–44years	High school or below	Local Visitors from Nanchang	Airplane	Traveling with Friends	0	2–3 Days	Moderately Concerned	No	1	0	0	0	0	0	0	0	1	1	1	0	0	1	0	0	0	0	0	0	0	1	42	Marginal	Enumerator 3
NC2025-0522	Valid Samples	2025-07-12	Nanchang Changbei International Airport	Male	25–34years	Master's degree or above	Local Visitors from Nanchang	Airplane	Group Tour	0	2–3 Days	Neutral	No	0	1	1	1	1	1	0	0	0	0	0	0	0	0	1	0	0	0	0	0	0	1	72	Very good	Enumerator 4
NC2025-0523	Valid Samples	2025-07-22	Nanchang Railway Station	Female	25–34years	Bachelor's degree	Visitors from Other Provinces in China	High-Speed Rail / Train	Traveling with Partner	0	2–3 Days	Moderately Concerned	Yes	1	0	0	0	0	0	0	0	0	0	1	0	0	1	0	0	0	0	0	0	0	0	47	Marginal	Enumerator 2
NC2025-0524	Valid Samples	2025-08-14	Nanchang Railway Station	Female	18–24years	Bachelor's degree	Visitors from Other Cities in Jiangxi Province	High-Speed Rail / Train	Traveling with Partner	0	1 Day	Slightly Concerned	Yes	0	0	0	1	0	1	0	0	0	0	0	1	0	0	0	0	0	0	0	0	0	0	71	Very good	Enumerator 2
NC2025-0525	Valid Samples	2025-07-16	Nanchang West Railway Station	Male	18–24years	Master's degree or above	Visitors from Other Provinces in China	High-Speed Rail / Train	Traveling with Family/Children	0	4–7 Days	Neutral	Yes	1	0	0	0	0	1	0	1	0	0	0	1	0	1	0	0	0	0	0	0	0	0	81	Excellent	Enumerator 2
NC2025-0526	Valid Samples	2025-07-03	Nanchang South Railway Station	Female	18–24years	Bachelor's degree	Visitors from Other Cities in Jiangxi Province	High-Speed Rail / Train	Group Tour	0	Less than Half a Day	Neutral	No	0	0	1	1	0	0	0	0	0	0	1	0	0	0	0	0	0	0	0	0	0	1	76	Very good	Enumerator 1
NC2025-0527	Valid Samples	2025-07-09	Nanchang West Railway Station	Female	18–24years	Bachelor's degree	Visitors from Other Provinces in China	High-Speed Rail / Train	Traveling Alone	0	1 Day	Moderately Concerned	No	0	0	0	1	0	0	1	1	0	1	0	1	0	0	0	1	0	0	0	0	0	1	90	Ideal	Enumerator 1
NC2025-0528	Valid Samples	2025-07-22	Nanchang Changbei International Airport	Female	45–59years	Bachelor's degree	Visitors from Other Provinces in China	Airplane	Traveling with Family/Children	2	Less than Half a Day	Neutral	No	0	1	1	1	1	0	0	0	0	1	1	0	0	0	0	0	0	0	0	0	0	1	85	Excellent	Enumerator 2
NC2025-0529	Valid Samples	2025-07-22	Nanchang West Railway Station	Male	25–34years	High school or below	Visitors from Other Provinces in China	High-Speed Rail / Train	Traveling with Partner	1	1 Day	Moderately Concerned	No	1	0	1	0	1	0	0	0	0	1	1	0	0	0	0	0	0	0	0	0	0	1	55	Acceptable	Enumerator 1
NC2025-0530	Valid Samples	2025-07-08	Nanchang Changbei International Airport	Male	25–34years	Associate degree	Visitors from Other Provinces in China	Airplane	Traveling with Family/Children	0	1 Day	Neutral	No	0	0	0	1	0	0	0	0	1	0	0	0	0	0	0	0	0	0	0	0	0	1	75	Very good	Enumerator 2
NC2025-0531	Valid Samples	2025-08-23	Nanchang South Railway Station	Female	25–34years	Bachelor's degree	Visitors from Other Provinces in China	High-Speed Rail / Train	Traveling with Family/Children	0	2–3 Days	Neutral	Yes	1	0	0	0	0	1	0	0	0	0	1	1	0	1	0	0	1	0	0	1	0	0	53	Acceptable	Enumerator 3
NC2025-0532	Valid Samples	2025-07-29	Nanchang West Railway Station	Male	18–24years	Bachelor's degree	Visitors from Other Provinces in China	High-Speed Rail / Train	Traveling with Family/Children	1	2–3 Days	Neutral	Yes	0	1	1	0	0	0	0	0	0	1	0	0	0	0	0	0	0	0	0	0	0	0	49	Marginal	Enumerator 1
NC2025-0533	Valid Samples	2025-07-05	Nanchang East Railway Station	Female	25–34years	Master's degree or above	Visitors from Other Provinces in China	High-Speed Rail / Train	Traveling with Partner	0	More than 7 Days	Very Concerned	Yes	0	0	1	1	0	0	1	1	0	1	0	1	0	0	0	0	0	0	0	0	0	0	54	Acceptable	Enumerator 3
NC2025-0534	Valid Samples	2025-07-04	Nanchang West Railway Station	Male	18–24years	Associate degree	Visitors from Other Provinces in China	High-Speed Rail / Train	Traveling with Family/Children	0	4–7 Days	Moderately Concerned	No	1	0	1	0	1	0	0	0	0	0	0	1	1	1	0	1	0	0	0	0	0	1	71	Very good	Enumerator 3
NC2025-0535	Valid Samples	2025-06-30	Nanchang East Railway Station	Female	25–34years	High school or below	Local Visitors from Nanchang	Local Public Transportation	Traveling with Partner	0	2–3 Days	Moderately Concerned	Yes	1	0	1	1	0	1	0	0	0	1	1	0	1	0	0	0	1	1	0	0	0	0	45	Marginal	Enumerator 1
NC2025-0537	Valid Samples	2025-07-16	Nanchang Changbei International Airport	Female	25–34years	Bachelor's degree	Visitors from Other Provinces in China	Airplane	Traveling with Family/Children	0	1 Day	Neutral	Yes	1	1	1	0	0	0	1	0	0	1	1	1	0	0	0	0	1	1	0	0	0	0	62	Good	Enumerator 1
NC2025-0538	Valid Samples	2025-07-01	Nanchang South Railway Station	Male	18–24years	Bachelor's degree	Visitors from Other Provinces in China	High-Speed Rail / Train	Traveling with Family/Children	1	Less than Half a Day	Very Concerned	Yes	0	0	1	1	0	1	0	0	0	1	0	0	0	1	1	1	0	1	0	0	0	0	74	Very good	Enumerator 2
NC2025-0539	Valid Samples	2025-07-04	Nanchang West Railway Station	Female	≥60years	Master's degree or above	Visitors from Other Provinces in China	Private Car	Traveling with Family/Children	0	1 Day	Very Concerned	No	1	0	0	0	0	0	1	0	0	0	1	0	0	0	0	0	0	0	0	0	0	1	83	Excellent	Enumerator 2
NC2025-0540	Valid Samples	2025-08-23	Nanchang Changbei International Airport	Female	18–24years	Associate degree	Local Visitors from Nanchang	Airplane	Traveling with Family/Children	0	2–3 Days	Moderately Concerned	No	1	1	0	0	1	0	0	0	0	0	0	0	0	0	0	0	0	0	0	0	0	1	55	Acceptable	Enumerator 2
NC2025-0541	Valid Samples	2025-08-02	Nanchang West Railway Station	Female	25–34years	Bachelor's degree	Visitors from Other Provinces in China	Private Car	Traveling with Partner	0	2–3 Days	Neutral	No	1	0	1	0	1	1	0	0	0	0	0	1	0	1	0	1	0	0	0	0	0	1	67	Good	Enumerator 3
NC2025-0542	Valid Samples	2025-08-19	Nanchang Railway Station	Male	35–44years	Master's degree or above	Local Visitors from Nanchang	High-Speed Rail / Train	Traveling with Friends	0	2–3 Days	Slightly Concerned	Yes	1	1	1	0	0	1	0	0	0	1	0	1	1	1	0	1	0	0	0	0	0	0	92	Ideal	Enumerator 2
NC2025-0543	Valid Samples	2025-07-05	Nanchang West Railway Station	Male	25–34years	Bachelor's degree	Visitors from Other Provinces in China	High-Speed Rail / Train	Traveling with Family/Children	1	2–3 Days	Moderately Concerned	No	1	0	1	0	0	1	0	0	0	1	0	0	1	0	0	0	0	0	0	0	0	1	74	Very good	Enumerator 1
NC2025-0544	Valid Samples	2025-08-20	Nanchang Changbei International Airport	Male	18–24years	Master's degree or above	Visitors from Other Provinces in China	Airplane	Traveling with Partner	0	1 Day	Very Concerned	No	0	0	0	1	1	1	1	1	0	0	0	1	0	0	0	0	0	0	0	0	0	1	66	Good	Enumerator 3
NC2025-0546	Valid Samples	2025-07-02	Nanchang West Railway Station	Male	18–24years	Associate degree	Local Visitors from Nanchang	High-Speed Rail / Train	Traveling with Friends	2	2–3 Days	Very Concerned	Yes	0	1	0	0	0	1	0	0	0	1	1	1	0	0	1	0	1	1	0	0	0	0	57	Acceptable	Enumerator 3
NC2025-0547	Valid Samples	2025-08-23	Nanchang Changbei International Airport	Female	35–44years	Bachelor's degree	Visitors from Other Cities in Jiangxi Province	Private Car	Group Tour	0	2–3 Days	Moderately Concerned	Yes	1	1	0	0	0	0	0	0	0	1	1	0	1	0	0	0	1	0	0	0	0	0	67	Good	Enumerator 4
NC2025-0548	Valid Samples	2025-07-21	Nanchang Railway Station	Female	18–24years	Bachelor's degree	Visitors from Other Provinces in China	High-Speed Rail / Train	Traveling with Friends	0	4–7 Days	Moderately Concerned	Yes	1	0	1	0	0	0	0	0	1	1	0	0	1	0	1	0	1	0	0	0	0	0	65	Good	Enumerator 4
NC2025-0549	Valid Samples	2025-07-29	Nanchang Railway Station	Female	25–34years	Bachelor's degree	Visitors from Other Cities in Jiangxi Province	High-Speed Rail / Train	Traveling with Friends	0	2–3 Days	Neutral	No	1	0	1	0	0	0	0	1	0	0	0	1	0	1	0	0	0	0	0	0	0	1	55	Acceptable	Enumerator 3
NC2025-0550	Valid Samples	2025-08-25	Nanchang Railway Station	Female	35–44years	Bachelor's degree	Visitors from Other Provinces in China	High-Speed Rail / Train	Traveling with Friends	0	2–3 Days	Slightly Concerned	No	1	0	0	1	0	0	0	0	0	1	0	0	1	1	0	0	0	0	0	0	0	1	64	Good	Enumerator 2
NC2025-0551	Valid Samples	2025-08-20	Nanchang East Railway Station	Female	35–44years	Bachelor's degree	Visitors from Other Cities in Jiangxi Province	High-Speed Rail / Train	Traveling Alone	0	2–3 Days	Neutral	No	1	1	1	0	0	1	0	0	0	0	1	0	1	0	0	0	0	0	0	0	0	1	64	Good	Enumerator 2
NC2025-0552	Valid Samples	2025-08-12	Nanchang East Railway Station	Female	25–34years	Bachelor's degree	Visitors from Other Provinces in China	High-Speed Rail / Train	Traveling Alone	0	2–3 Days	Moderately Concerned	Yes	1	1	0	0	0	0	1	0	0	1	0	0	0	0	0	0	0	0	0	0	0	0	45	Marginal	Enumerator 2
NC2025-0553	Valid Samples	2025-08-19	Nanchang West Railway Station	Female	18–24years	Master's degree or above	Visitors from Other Provinces in China	Other	Traveling with Friends	0	More than 7 Days	Moderately Concerned	No	1	0	0	0	0	1	0	0	0	1	0	1	0	0	0	0	0	0	0	0	0	1	78	Very good	Enumerator 1
NC2025-0554	Valid Samples	2025-08-12	Nanchang South Railway Station	Female	35–44years	Bachelor's degree	Visitors from Other Provinces in China	High-Speed Rail / Train	Traveling with Friends	1	1 Day	Not Concerned at All	No	0	1	0	1	0	1	0	0	0	0	0	0	1	0	0	0	0	0	0	0	0	1	70	Very good	Enumerator 3
NC2025-0555	Valid Samples	2025-07-07	Nanchang Changbei International Airport	Female	18–24years	High school or below	Local Visitors from Nanchang	Airplane	Traveling Alone	0	1 Day	Neutral	Yes	1	0	0	0	1	1	0	0	0	0	0	0	0	0	0	1	1	0	0	0	0	0	54	Acceptable	Enumerator 3
NC2025-0556	Valid Samples	2025-08-30	Nanchang East Railway Station	Female	45–59years	Bachelor's degree	Visitors from Other Provinces in China	High-Speed Rail / Train	Traveling with Family/Children	0	2–3 Days	Very Concerned	No	1	0	0	1	0	1	0	0	0	1	1	0	0	1	0	0	0	0	0	0	0	1	68	Good	Enumerator 4
NC2025-0557	Valid Samples	2025-08-20	Nanchang Railway Station	Male	25–34years	Bachelor's degree	Visitors from Other Provinces in China	Private Car	Traveling with Family/Children	0	Less than Half a Day	Neutral	No	1	1	0	1	1	0	0	0	0	1	0	1	0	0	0	0	0	0	0	0	0	1	72	Very good	Enumerator 3
NC2025-0558	Valid Samples	2025-08-30	Nanchang East Railway Station	Male	18–24years	Associate degree	Visitors from Other Provinces in China	High-Speed Rail / Train	Traveling with Friends	0	More than 7 Days	Slightly Concerned	No	1	0	0	0	0	0	1	0	0	0	1	1	0	1	0	1	0	0	0	0	0	1	88	Excellent	Enumerator 3
NC2025-0559	Valid Samples	2025-07-24	Nanchang Railway Station	Male	25–34years	High school or below	Local Visitors from Nanchang	Private Car	Traveling with Friends	0	1 Day	Moderately Concerned	No	0	1	1	0	0	0	0	0	0	1	0	1	1	0	1	0	0	0	0	0	0	1	79	Very good	Enumerator 1
NC2025-0560	Valid Samples	2025-07-05	Nanchang South Railway Station	Male	35–44years	Bachelor's degree	Visitors from Other Cities in Jiangxi Province	High-Speed Rail / Train	Traveling with Family/Children	0	1 Day	Very Concerned	Yes	1	0	0	0	0	0	0	0	0	1	0	1	1	0	0	0	1	0	0	0	1	0	56	Acceptable	Enumerator 3
NC2025-0561	Valid Samples	2025-08-22	Nanchang East Railway Station	Female	25–34years	Bachelor's degree	Visitors from Other Cities in Jiangxi Province	High-Speed Rail / Train	Group Tour	1	1 Day	Slightly Concerned	Yes	1	0	0	0	0	0	0	0	0	0	0	0	0	0	0	0	1	0	0	0	0	0	53	Acceptable	Enumerator 1
NC2025-0562	Valid Samples	2025-08-04	Nanchang East Railway Station	Female	45–59years	High school or below	Visitors from Other Provinces in China	High-Speed Rail / Train	Traveling with Friends	0	4–7 Days	Slightly Concerned	Yes	0	0	0	1	1	1	0	0	0	1	1	1	0	1	0	0	0	0	0	0	0	0	64	Good	Enumerator 1
NC2025-0563	Valid Samples	2025-08-24	Nanchang Railway Station	Female	25–34years	Associate degree	Visitors from Other Cities in Jiangxi Province	Long-Distance Bus	Group Tour	0	Less than Half a Day	Moderately Concerned	No	1	0	1	0	1	1	1	0	0	1	0	1	1	1	0	1	0	0	0	0	0	1	63	Good	Enumerator 4
NC2025-0564	Valid Samples	2025-07-16	Nanchang Railway Station	Female	18–24years	High school or below	Visitors from Other Cities in Jiangxi Province	Private Car	Traveling with Friends	1	2–3 Days	Not Concerned at All	No	0	0	1	0	0	0	0	0	0	0	0	0	1	0	0	0	0	0	0	0	0	1	53	Acceptable	Enumerator 2
NC2025-0565	Valid Samples	2025-07-14	Nanchang East Railway Station	Male	25–34years	Master's degree or above	Visitors from Other Provinces in China	High-Speed Rail / Train	Traveling with Friends	0	1 Day	Very Concerned	No	0	0	0	1	1	0	1	0	0	0	0	0	0	0	0	0	0	0	0	0	0	1	84	Excellent	Enumerator 2
NC2025-0566	Valid Samples	2025-06-30	Nanchang Changbei International Airport	Female	18–24years	Bachelor's degree	Visitors from Other Cities in Jiangxi Province	Private Car	Traveling with Family/Children	0	2–3 Days	Moderately Concerned	No	0	1	1	0	0	0	0	0	0	1	0	1	0	1	0	1	0	0	0	0	0	1	62	Good	Enumerator 2
NC2025-0567	Valid Samples	2025-08-04	Nanchang South Railway Station	Male	25–34years	Associate degree	Visitors from Other Cities in Jiangxi Province	High-Speed Rail / Train	Traveling with Family/Children	0	2–3 Days	Moderately Concerned	No	1	0	1	1	0	0	0	0	0	0	0	1	1	0	0	0	0	0	0	0	0	1	67	Good	Enumerator 1
NC2025-0568	Valid Samples	2025-08-01	Nanchang Changbei International Airport	Male	35–44years	Bachelor's degree	Visitors from Other Cities in Jiangxi Province	Private Car	Traveling with Family/Children	1	2–3 Days	Very Concerned	No	0	1	1	1	0	0	0	0	1	1	1	0	0	1	0	0	0	0	0	0	0	1	100	Ideal	Enumerator 3
NC2025-0569	Valid Samples	2025-08-13	Nanchang Changbei International Airport	Female	25–34years	Bachelor's degree	Visitors from Other Provinces in China	Private Car	Traveling with Friends	1	2–3 Days	Moderately Concerned	No	0	0	0	0	0	0	1	0	0	0	0	0	1	0	1	0	0	0	0	0	0	1	50	Acceptable	Enumerator 2
NC2025-0570	Valid Samples	2025-08-29	Nanchang Railway Station	Female	35–44years	Master's degree or above	Visitors from Other Cities in Jiangxi Province	High-Speed Rail / Train	Group Tour	0	2–3 Days	Neutral	Yes	0	0	1	0	1	0	0	0	0	1	0	0	0	1	0	0	1	0	0	0	0	0	54	Acceptable	Enumerator 1
NC2025-0571	Valid Samples	2025-07-29	Nanchang East Railway Station	Female	18–24years	High school or below	Visitors from Other Cities in Jiangxi Province	High-Speed Rail / Train	Traveling with Friends	1	4–7 Days	Slightly Concerned	No	0	0	0	0	1	0	0	0	0	1	0	0	0	1	0	0	0	0	0	0	0	1	67	Good	Enumerator 3
NC2025-0572	Valid Samples	2025-08-22	Nanchang Changbei International Airport	Male	18–24years	High school or below	Visitors from Other Provinces in China	Private Car	Traveling with Partner	0	1 Day	Neutral	Yes	1	0	1	1	0	0	0	0	0	1	0	0	0	0	0	0	1	0	1	0	0	0	67	Good	Enumerator 1
NC2025-0573	Valid Samples	2025-07-01	Nanchang Changbei International Airport	Male	45–59years	Associate degree	Visitors from Other Provinces in China	Airplane	Traveling with Family/Children	1	1 Day	Moderately Concerned	Yes	1	0	0	1	0	1	1	0	0	0	0	1	1	1	0	0	0	0	0	0	0	0	52	Acceptable	Enumerator 4
NC2025-0574	Valid Samples	2025-07-17	Nanchang West Railway Station	Female	35–44years	Associate degree	Visitors from Other Provinces in China	High-Speed Rail / Train	Traveling with Friends	0	2–3 Days	Moderately Concerned	Yes	1	0	1	1	0	1	0	1	0	1	1	0	1	1	0	0	0	1	0	1	0	0	73	Very good	Enumerator 4
NC2025-0575	Valid Samples	2025-08-22	Nanchang West Railway Station	Male	18–24years	Bachelor's degree	Visitors from Other Provinces in China	Private Car	Traveling with Family/Children	0	1 Day	Moderately Concerned	No	0	0	0	0	0	1	1	0	0	1	0	1	0	0	1	0	0	0	0	0	0	1	71	Very good	Enumerator 1
NC2025-0576	Valid Samples	2025-08-06	Nanchang East Railway Station	Female	25–34years	Master's degree or above	Local Visitors from Nanchang	High-Speed Rail / Train	Group Tour	0	2–3 Days	Very Concerned	Yes	0	0	1	1	1	0	0	0	0	0	0	1	1	1	0	0	0	0	0	1	0	0	63	Good	Enumerator 2
NC2025-0577	Valid Samples	2025-08-18	Nanchang West Railway Station	Female	18–24years	Bachelor's degree	Visitors from Other Cities in Jiangxi Province	High-Speed Rail / Train	Traveling with Family/Children	0	4–7 Days	Moderately Concerned	No	1	0	1	0	0	1	0	0	0	1	1	1	1	1	0	1	0	0	0	0	0	1	92	Ideal	Enumerator 3
NC2025-0578	Valid Samples	2025-08-25	Nanchang Changbei International Airport	Male	35–44years	Associate degree	Visitors from Other Provinces in China	Private Car	Traveling with Partner	0	2–3 Days	Very Concerned	No	1	1	1	0	0	0	0	0	0	0	1	0	1	0	0	0	0	0	0	0	0	1	56	Acceptable	Enumerator 2
NC2025-0579	Valid Samples	2025-07-14	Nanchang West Railway Station	Male	45–59years	Bachelor's degree	Visitors from Other Cities in Jiangxi Province	High-Speed Rail / Train	Traveling Alone	0	1 Day	Very Concerned	Yes	1	0	0	0	1	0	0	0	0	1	0	0	0	1	0	0	0	0	0	1	0	0	62	Good	Enumerator 1
NC2025-0580	Valid Samples	2025-07-06	Nanchang South Railway Station	Female	35–44years	Bachelor's degree	Visitors from Hong Kong, Macao, Taiwan, and Overseas	High-Speed Rail / Train	Traveling with Family/Children	0	4–7 Days	Very Concerned	Yes	1	0	0	0	0	0	0	0	0	1	0	0	1	0	0	0	1	0	1	1	0	0	51	Acceptable	Enumerator 3
NC2025-0581	Valid Samples	2025-07-11	Nanchang Changbei International Airport	Female	45–59years	Master's degree or above	Visitors from Other Cities in Jiangxi Province	Airplane	Traveling with Family/Children	2	2–3 Days	Moderately Concerned	No	1	0	0	0	0	1	0	0	0	0	1	1	0	0	0	1	0	0	0	0	0	1	69	Good	Enumerator 3
NC2025-0582	Valid Samples	2025-08-17	Nanchang Railway Station	Female	45–59years	Bachelor's degree	Visitors from Other Cities in Jiangxi Province	Private Car	Traveling Alone	0	4–7 Days	Very Concerned	No	1	0	0	0	0	0	0	0	0	1	0	0	1	0	0	0	0	0	0	0	0	1	59	Acceptable	Enumerator 4
NC2025-0583	Valid Samples	2025-08-01	Nanchang Railway Station	Male	18–24years	High school or below	Local Visitors from Nanchang	High-Speed Rail / Train	Group Tour	0	1 Day	Neutral	Yes	0	0	0	0	1	0	0	0	0	0	0	0	0	0	0	0	0	0	0	0	0	0	47	Marginal	Enumerator 3
NC2025-0584	Valid Samples	2025-07-31	Nanchang South Railway Station	Male	25–34years	Bachelor's degree	Visitors from Other Provinces in China	High-Speed Rail / Train	Traveling with Friends	0	2–3 Days	Neutral	Yes	1	1	0	0	1	1	0	0	0	0	0	0	1	0	0	0	1	0	0	0	0	0	78	Very good	Enumerator 2
NC2025-0585	Valid Samples	2025-08-30	Nanchang West Railway Station	Male	25–34years	High school or below	Visitors from Other Provinces in China	Private Car	Traveling with Friends	2	1 Day	Moderately Concerned	Yes	0	1	1	1	0	1	0	0	0	0	1	0	0	0	0	0	0	0	1	0	0	0	61	Good	Enumerator 2
NC2025-0586	Valid Samples	2025-07-10	Nanchang South Railway Station	Female	35–44years	Associate degree	Visitors from Other Provinces in China	High-Speed Rail / Train	Traveling Alone	0	1 Day	Moderately Concerned	No	0	1	1	0	0	0	0	1	0	0	0	1	0	0	0	1	0	0	0	0	0	1	76	Very good	Enumerator 3
NC2025-0587	Valid Samples	2025-07-11	Nanchang Changbei International Airport	Female	18–24years	High school or below	Local Visitors from Nanchang	Private Car	Traveling with Family/Children	2	Less than Half a Day	Very Concerned	Yes	1	0	0	0	0	1	0	1	0	0	1	0	0	0	0	0	0	0	0	1	0	0	45	Marginal	Enumerator 3
NC2025-0588	Valid Samples	2025-08-06	Nanchang Railway Station	Female	18–24years	Bachelor's degree	Visitors from Other Cities in Jiangxi Province	Long-Distance Bus	Traveling with Friends	0	2–3 Days	Neutral	Yes	1	1	0	0	1	0	0	0	0	1	1	1	1	0	0	0	0	0	0	0	0	0	74	Very good	Enumerator 1
NC2025-0589	Valid Samples	2025-08-01	Nanchang West Railway Station	Female	18–24years	Bachelor's degree	Local Visitors from Nanchang	High-Speed Rail / Train	Traveling Alone	1	1 Day	Moderately Concerned	Yes	0	1	0	0	0	0	0	0	0	0	0	1	0	0	0	1	0	0	0	0	0	0	66	Good	Enumerator 3
NC2025-0590	Valid Samples	2025-08-12	Nanchang Railway Station	Female	25–34years	Associate degree	Visitors from Other Cities in Jiangxi Province	High-Speed Rail / Train	Traveling with Partner	0	2–3 Days	Very Concerned	Yes	1	1	0	0	1	1	0	0	0	0	1	1	0	1	0	0	1	0	1	0	0	0	82	Excellent	Enumerator 4
NC2025-0591	Valid Samples	2025-08-28	Nanchang East Railway Station	Male	25–34years	Master's degree or above	Visitors from Other Provinces in China	Private Car	Group Tour	0	2–3 Days	Moderately Concerned	No	1	1	1	0	0	0	0	0	0	0	0	0	1	0	0	0	0	0	0	0	0	1	53	Acceptable	Enumerator 3
NC2025-0592	Valid Samples	2025-07-03	Nanchang Changbei International Airport	Male	18–24years	Associate degree	Visitors from Other Cities in Jiangxi Province	Private Car	Traveling with Family/Children	0	2–3 Days	Neutral	No	0	1	0	0	0	0	0	0	0	1	0	1	0	0	0	0	0	0	0	0	0	1	62	Good	Enumerator 3
NC2025-0593	Valid Samples	2025-07-17	Nanchang Railway Station	Female	18–24years	Bachelor's degree	Visitors from Other Cities in Jiangxi Province	High-Speed Rail / Train	Traveling with Family/Children	1	4–7 Days	Moderately Concerned	Yes	0	0	1	0	0	0	0	0	0	1	0	1	0	0	0	0	0	1	0	0	1	0	70	Very good	Enumerator 1
NC2025-0594	Valid Samples	2025-08-14	Nanchang Railway Station	Male	≥60years	High school or below	Visitors from Other Cities in Jiangxi Province	High-Speed Rail / Train	Group Tour	0	2–3 Days	Moderately Concerned	No	1	0	1	1	0	1	0	0	0	1	0	1	1	0	0	0	0	0	0	0	0	1	54	Acceptable	Enumerator 2
NC2025-0595	Valid Samples	2025-07-21	Nanchang Railway Station	Male	18–24years	Bachelor's degree	Visitors from Other Provinces in China	High-Speed Rail / Train	Traveling with Family/Children	0	2–3 Days	Moderately Concerned	No	0	0	0	1	1	0	0	0	0	1	1	1	1	0	0	0	0	0	0	0	0	1	71	Very good	Enumerator 4
NC2025-0596	Valid Samples	2025-07-17	Nanchang West Railway Station	Male	18–24years	Master's degree or above	Visitors from Other Provinces in China	High-Speed Rail / Train	Traveling with Friends	2	2–3 Days	Very Concerned	Yes	1	1	1	1	1	0	0	0	0	1	1	0	1	0	0	0	0	1	0	0	0	0	69	Good	Enumerator 2
NC2025-0597	Valid Samples	2025-08-14	Nanchang West Railway Station	Female	≥60years	Bachelor's degree	Visitors from Other Provinces in China	High-Speed Rail / Train	Traveling with Family/Children	2	Less than Half a Day	Moderately Concerned	Yes	1	1	0	1	0	0	0	0	0	1	0	0	1	0	1	0	0	1	0	0	0	0	69	Good	Enumerator 2
NC2025-0598	Valid Samples	2025-07-08	Nanchang East Railway Station	Male	18–24years	Master's degree or above	Visitors from Other Provinces in China	Local Public Transportation	Traveling with Friends	1	2–3 Days	Neutral	Yes	1	1	0	0	0	1	1	0	0	1	1	0	1	1	0	0	1	1	0	0	0	0	71	Very good	Enumerator 1
NC2025-0599	Valid Samples	2025-07-28	Nanchang Changbei International Airport	Male	25–34years	Master's degree or above	Visitors from Other Provinces in China	Airplane	Traveling with Partner	1	1 Day	Very Concerned	No	1	0	1	0	0	1	0	0	0	0	0	0	1	1	1	0	0	0	0	0	0	1	41	Marginal	Enumerator 1
NC2025-0600	Valid Samples	2025-07-15	Nanchang Changbei International Airport	Male	35–44years	Associate degree	Visitors from Other Cities in Jiangxi Province	Airplane	Traveling with Family/Children	0	4–7 Days	Slightly Concerned	Yes	0	0	0	0	0	1	0	0	0	1	0	1	1	0	0	0	1	0	0	0	0	0	75	Very good	Enumerator 4
NC2025-0601	Valid Samples	2025-08-05	Nanchang East Railway Station	Female	18–24years	High school or below	Visitors from Other Provinces in China	High-Speed Rail / Train	Traveling with Friends	0	1 Day	Moderately Concerned	Yes	1	1	1	0	0	1	0	0	0	0	1	0	0	0	0	0	0	0	0	0	0	0	71	Very good	Enumerator 3
NC2025-0602	Valid Samples	2025-07-18	Nanchang West Railway Station	Female	25–34years	Associate degree	Local Visitors from Nanchang	High-Speed Rail / Train	Traveling with Friends	0	2–3 Days	Very Concerned	Yes	1	0	0	0	0	0	0	0	0	1	1	1	1	0	1	0	0	0	0	0	0	0	46	Marginal	Enumerator 2
NC2025-0603	Valid Samples	2025-08-19	Nanchang Changbei International Airport	Female	45–59years	Master's degree or above	Visitors from Other Provinces in China	Private Car	Group Tour	2	1 Day	Neutral	Yes	1	1	0	1	0	0	1	0	0	1	1	1	0	0	0	0	1	0	1	0	0	0	71	Very good	Enumerator 4
NC2025-0604	Valid Samples	2025-07-03	Nanchang Railway Station	Female	35–44years	Bachelor's degree	Local Visitors from Nanchang	High-Speed Rail / Train	Traveling with Friends	0	2–3 Days	Neutral	Yes	1	0	1	0	0	1	0	0	0	1	0	1	0	0	0	0	0	0	0	0	0	0	91	Ideal	Enumerator 2
NC2025-0605	Valid Samples	2025-07-06	Nanchang Changbei International Airport	Male	25–34years	High school or below	Visitors from Other Cities in Jiangxi Province	Airplane	Traveling Alone	0	4–7 Days	Moderately Concerned	No	0	0	0	1	0	1	0	0	1	1	1	1	1	0	0	0	0	0	0	0	0	1	87	Excellent	Enumerator 4
NC2025-0607	Valid Samples	2025-08-03	Nanchang South Railway Station	Female	25–34years	High school or below	Visitors from Other Cities in Jiangxi Province	High-Speed Rail / Train	Traveling with Friends	2	1 Day	Moderately Concerned	Yes	0	1	1	1	0	1	0	0	0	1	1	0	0	0	0	0	1	1	0	0	0	0	70	Very good	Enumerator 4
NC2025-0608	Valid Samples	2025-07-02	Nanchang Railway Station	Female	18–24years	Master's degree or above	Visitors from Other Provinces in China	High-Speed Rail / Train	Traveling with Family/Children	2	2–3 Days	Moderately Concerned	No	0	1	1	0	0	0	0	0	0	1	0	0	0	0	1	0	0	0	0	0	0	1	56	Acceptable	Enumerator 3
NC2025-0609	Valid Samples	2025-08-16	Nanchang West Railway Station	Female	18–24years	Bachelor's degree	Visitors from Other Cities in Jiangxi Province	Local Public Transportation	Traveling Alone	0	2–3 Days	Neutral	No	1	0	0	0	0	0	0	0	0	0	0	1	1	0	0	0	0	0	0	0	0	1	63	Good	Enumerator 1
NC2025-0610	Valid Samples	2025-07-28	Nanchang Railway Station	Male	25–34years	Bachelor's degree	Visitors from Other Cities in Jiangxi Province	High-Speed Rail / Train	Traveling with Family/Children	0	1 Day	Very Concerned	Yes	1	1	1	0	0	1	0	0	0	1	0	0	0	0	0	0	0	0	0	0	0	0	36	nfavorable	Enumerator 1
NC2025-0611	Valid Samples	2025-08-03	Nanchang Changbei International Airport	Female	35–44years	Associate degree	Visitors from Other Provinces in China	Airplane	Traveling with Friends	0	1 Day	Very Concerned	No	0	1	1	0	1	1	0	0	0	1	0	0	0	0	0	0	0	0	0	0	0	1	61	Good	Enumerator 1
NC2025-0612	Valid Samples	2025-08-05	Nanchang Changbei International Airport	Female	25–34years	Bachelor's degree	Visitors from Other Provinces in China	Airplane	Traveling Alone	0	4–7 Days	Neutral	Yes	1	1	0	0	0	1	0	1	0	1	0	0	0	1	0	0	1	0	1	0	0	0	53	Acceptable	Enumerator 4
NC2025-0613	Valid Samples	2025-08-03	Nanchang Changbei International Airport	Female	45–59years	High school or below	Visitors from Other Cities in Jiangxi Province	Private Car	Traveling with Partner	2	1 Day	Slightly Concerned	Yes	1	1	1	1	0	1	0	0	0	0	0	1	1	0	0	0	0	1	1	0	0	0	49	Marginal	Enumerator 4
NC2025-0614	Valid Samples	2025-08-15	Nanchang South Railway Station	Female	≥60years	Bachelor's degree	Visitors from Other Provinces in China	High-Speed Rail / Train	Traveling with Family/Children	2	2–3 Days	Very Concerned	Yes	1	0	0	0	1	0	0	0	0	1	0	1	1	1	0	1	0	0	0	0	0	0	65	Good	Enumerator 2
NC2025-0615	Valid Samples	2025-08-22	Nanchang East Railway Station	Female	25–34years	Bachelor's degree	Visitors from Other Provinces in China	High-Speed Rail / Train	Traveling with Partner	0	2–3 Days	Moderately Concerned	Yes	1	0	1	1	1	1	0	1	0	1	0	0	0	0	0	0	1	0	0	1	1	0	80	Excellent	Enumerator 2
NC2025-0616	Valid Samples	2025-08-05	Nanchang Railway Station	Male	25–34years	Bachelor's degree	Visitors from Other Provinces in China	Private Car	Traveling with Friends	0	1 Day	Slightly Concerned	Yes	0	1	1	0	0	0	0	0	0	0	1	0	0	1	0	0	0	0	0	0	0	0	45	Marginal	Enumerator 2
NC2025-0617	Valid Samples	2025-08-23	Nanchang South Railway Station	Female	25–34years	High school or below	Visitors from Other Provinces in China	High-Speed Rail / Train	Traveling with Friends	0	2–3 Days	Very Concerned	Yes	1	0	0	0	0	1	0	0	0	0	0	0	0	0	0	0	0	0	0	0	0	0	40	Marginal	Enumerator 2
NC2025-0618	Valid Samples	2025-07-25	Nanchang South Railway Station	Female	25–34years	Bachelor's degree	Visitors from Other Provinces in China	High-Speed Rail / Train	Traveling with Family/Children	0	Less than Half a Day	Moderately Concerned	Yes	0	1	0	1	0	1	0	0	0	1	0	1	0	0	0	0	0	1	1	0	0	0	56	Acceptable	Enumerator 3
NC2025-0619	Valid Samples	2025-07-11	Nanchang South Railway Station	Male	35–44years	Bachelor's degree	Visitors from Other Provinces in China	High-Speed Rail / Train	Traveling with Family/Children	0	4–7 Days	Very Concerned	Yes	0	0	1	0	1	0	0	0	0	1	0	0	0	0	0	0	0	0	0	0	0	0	64	Good	Enumerator 2
NC2025-0620	Valid Samples	2025-07-16	Nanchang Railway Station	Female	18–24years	High school or below	Visitors from Other Provinces in China	Local Public Transportation	Traveling with Family/Children	1	1 Day	Moderately Concerned	Yes	0	1	0	1	1	0	1	0	0	0	0	0	0	0	0	0	0	0	0	1	0	0	59	Acceptable	Enumerator 1
NC2025-0621	Valid Samples	2025-07-04	Nanchang East Railway Station	Male	25–34years	Associate degree	Visitors from Other Provinces in China	High-Speed Rail / Train	Traveling with Family/Children	0	1 Day	Moderately Concerned	Yes	1	0	1	0	0	1	0	0	0	0	0	0	1	0	0	0	0	0	0	1	0	0	70	Very good	Enumerator 2
NC2025-0622	Valid Samples	2025-08-14	Nanchang West Railway Station	Male	45–59years	Bachelor's degree	Visitors from Other Cities in Jiangxi Province	Private Car	Traveling with Family/Children	1	1 Day	Slightly Concerned	No	0	0	0	0	0	0	1	0	0	0	1	0	0	1	0	0	0	0	0	0	0	1	89	Excellent	Enumerator 1
NC2025-0623	Valid Samples	2025-08-26	Nanchang South Railway Station	Female	45–59years	Master's degree or above	Visitors from Other Provinces in China	High-Speed Rail / Train	Traveling with Partner	0	2–3 Days	Moderately Concerned	Yes	1	1	0	0	0	1	0	0	0	1	1	0	0	0	0	0	0	0	0	1	0	0	73	Very good	Enumerator 3
NC2025-0624	Valid Samples	2025-08-02	Nanchang Railway Station	Female	25–34years	Associate degree	Visitors from Other Provinces in China	Private Car	Traveling with Family/Children	0	Less than Half a Day	Moderately Concerned	No	1	0	1	1	0	1	0	0	0	1	1	1	1	0	0	0	0	0	0	0	0	1	75	Very good	Enumerator 3
NC2025-0625	Valid Samples	2025-07-06	Nanchang South Railway Station	Male	35–44years	Master's degree or above	Visitors from Other Provinces in China	High-Speed Rail / Train	Traveling Alone	2	Less than Half a Day	Moderately Concerned	Yes	1	1	1	0	0	1	0	0	0	1	1	1	1	0	0	0	0	0	0	1	0	0	76	Very good	Enumerator 1
NC2025-0626	Valid Samples	2025-08-18	Nanchang Changbei International Airport	Male	18–24years	Master's degree or above	Visitors from Other Provinces in China	Private Car	Traveling Alone	0	2–3 Days	Moderately Concerned	Yes	0	1	0	0	1	1	0	0	0	1	0	0	1	0	0	1	1	0	0	1	0	0	68	Good	Enumerator 2
NC2025-0627	Valid Samples	2025-07-31	Nanchang South Railway Station	Male	45–59years	Bachelor's degree	Visitors from Other Provinces in China	High-Speed Rail / Train	Traveling with Friends	0	Less than Half a Day	Slightly Concerned	No	1	0	0	1	0	0	1	0	0	0	1	1	1	1	1	0	0	0	0	0	0	1	61	Good	Enumerator 1
NC2025-0628	Valid Samples	2025-07-18	Nanchang West Railway Station	Female	45–59years	Associate degree	Visitors from Other Provinces in China	High-Speed Rail / Train	Traveling with Friends	0	2–3 Days	Moderately Concerned	Yes	0	1	0	0	0	1	0	0	0	0	1	0	0	1	0	0	0	0	1	0	0	0	74	Very good	Enumerator 1
NC2025-0629	Valid Samples	2025-07-27	Nanchang West Railway Station	Male	35–44years	Master's degree or above	Visitors from Other Cities in Jiangxi Province	High-Speed Rail / Train	Traveling Alone	1	4–7 Days	Moderately Concerned	No	0	0	1	0	0	1	0	0	0	0	0	1	0	0	0	1	0	0	0	0	0	1	78	Very good	Enumerator 3
NC2025-0630	Valid Samples	2025-08-04	Nanchang Railway Station	Female	35–44years	Bachelor's degree	Local Visitors from Nanchang	Other	Traveling Alone	0	1 Day	Neutral	Yes	1	0	1	0	1	0	0	1	0	0	0	1	0	0	1	1	1	0	0	0	0	0	57	Acceptable	Enumerator 3
NC2025-0631	Valid Samples	2025-07-24	Nanchang Railway Station	Female	25–34years	Bachelor's degree	Visitors from Hong Kong, Macao, Taiwan, and Overseas	Private Car	Group Tour	4	2–3 Days	Neutral	No	1	0	1	0	0	0	0	0	0	0	0	0	1	0	0	0	0	0	0	0	0	1	64	Good	Enumerator 3
NC2025-0632	Valid Samples	2025-07-22	Nanchang Railway Station	Female	18–24years	High school or below	Local Visitors from Nanchang	Local Public Transportation	Traveling with Partner	4	2–3 Days	Neutral	Yes	1	0	1	1	0	1	0	0	0	1	0	1	0	0	0	0	0	0	0	0	0	0	69	Good	Enumerator 4
NC2025-0633	Valid Samples	2025-07-19	Nanchang South Railway Station	Female	25–34years	High school or below	Visitors from Other Cities in Jiangxi Province	High-Speed Rail / Train	Traveling Alone	1	2–3 Days	Very Concerned	No	0	0	0	0	0	0	0	0	0	1	1	0	1	0	0	0	0	0	0	0	0	1	70	Very good	Enumerator 1
NC2025-0634	Valid Samples	2025-08-23	Nanchang West Railway Station	Male	≥60years	Master's degree or above	Visitors from Other Provinces in China	High-Speed Rail / Train	Traveling Alone	1	1 Day	Moderately Concerned	No	1	0	0	1	1	1	0	0	0	1	0	0	0	0	0	0	0	0	0	0	0	1	47	Marginal	Enumerator 2
NC2025-0635	Valid Samples	2025-07-24	Nanchang West Railway Station	Male	25–34years	Associate degree	Local Visitors from Nanchang	High-Speed Rail / Train	Traveling with Partner	0	Less than Half a Day	Moderately Concerned	Yes	0	0	1	0	0	1	0	0	0	0	1	1	0	1	0	1	1	0	0	1	0	0	58	Acceptable	Enumerator 1
NC2025-0636	Valid Samples	2025-07-29	Nanchang Railway Station	Male	25–34years	Bachelor's degree	Visitors from Other Provinces in China	High-Speed Rail / Train	Traveling with Family/Children	0	Less than Half a Day	Neutral	Yes	1	1	0	1	1	0	0	0	0	1	0	0	0	1	0	1	1	0	0	0	0	0	72	Very good	Enumerator 2
NC2025-0637	Valid Samples	2025-07-05	Nanchang West Railway Station	Male	25–34years	Bachelor's degree	Visitors from Other Provinces in China	Local Public Transportation	Traveling with Family/Children	1	4–7 Days	Moderately Concerned	No	1	0	1	1	0	0	0	0	0	0	1	0	0	0	0	1	0	0	0	0	0	1	68	Good	Enumerator 1
NC2025-0638	Valid Samples	2025-07-19	Nanchang South Railway Station	Male	35–44years	Bachelor's degree	Visitors from Other Provinces in China	High-Speed Rail / Train	Traveling with Family/Children	0	2–3 Days	Moderately Concerned	No	1	1	0	1	0	0	0	0	0	1	1	1	0	0	0	0	0	0	0	0	0	1	64	Good	Enumerator 2
NC2025-0639	Valid Samples	2025-07-21	Nanchang Changbei International Airport	Female	18–24years	High school or below	Visitors from Other Provinces in China	Private Car	Traveling with Friends	0	2–3 Days	Neutral	No	0	1	0	1	1	0	0	0	1	0	1	0	0	0	0	0	0	0	0	0	0	1	64	Good	Enumerator 1
NC2025-0640	Valid Samples	2025-06-30	Nanchang South Railway Station	Male	18–24years	Master's degree or above	Visitors from Other Cities in Jiangxi Province	High-Speed Rail / Train	Traveling with Family/Children	0	2–3 Days	Moderately Concerned	Yes	1	1	0	0	1	0	0	0	0	1	1	1	0	0	0	0	0	0	0	1	0	0	75	Very good	Enumerator 1
NC2025-0641	Valid Samples	2025-07-14	Nanchang West Railway Station	Male	35–44years	High school or below	Visitors from Other Provinces in China	Long-Distance Bus	Traveling with Partner	0	4–7 Days	Moderately Concerned	Yes	0	0	1	0	0	0	0	0	0	1	1	1	1	0	0	0	1	1	0	0	0	0	77	Very good	Enumerator 1
NC2025-0642	Valid Samples	2025-08-18	Nanchang East Railway Station	Female	18–24years	Associate degree	Visitors from Other Cities in Jiangxi Province	High-Speed Rail / Train	Traveling with Family/Children	0	2–3 Days	Neutral	Yes	0	1	1	0	0	0	1	0	0	0	0	0	1	0	0	1	0	0	1	0	0	0	66	Good	Enumerator 4
NC2025-0643	Valid Samples	2025-07-19	Nanchang West Railway Station	Male	18–24years	Associate degree	Visitors from Other Cities in Jiangxi Province	High-Speed Rail / Train	Traveling with Family/Children	2	2–3 Days	Moderately Concerned	No	1	0	1	0	0	1	1	0	0	0	0	0	0	0	0	1	0	0	0	0	0	1	77	Very good	Enumerator 1
NC2025-0644	Valid Samples	2025-07-12	Nanchang West Railway Station	Female	18–24years	Associate degree	Visitors from Other Provinces in China	High-Speed Rail / Train	Traveling with Partner	0	Less than Half a Day	Moderately Concerned	Yes	0	0	0	0	0	0	0	0	0	0	1	1	0	0	0	1	0	1	1	0	0	0	66	Good	Enumerator 3
NC2025-0646	Valid Samples	2025-07-01	Nanchang West Railway Station	Male	18–24years	Associate degree	Visitors from Other Provinces in China	Local Public Transportation	Traveling with Partner	1	1 Day	Very Concerned	Yes	0	1	0	0	1	0	1	0	0	1	1	0	0	1	0	0	0	0	0	0	0	0	78	Very good	Enumerator 3
NC2025-0647	Valid Samples	2025-07-10	Nanchang Changbei International Airport	Female	18–24years	Associate degree	Visitors from Other Provinces in China	Airplane	Traveling with Friends	0	1 Day	Slightly Concerned	No	1	1	0	0	0	1	0	0	0	0	1	0	0	0	0	0	0	0	0	0	0	1	87	Excellent	Enumerator 1
NC2025-0648	Valid Samples	2025-08-29	Nanchang Changbei International Airport	Male	25–34years	Bachelor's degree	Visitors from Other Provinces in China	Airplane	Traveling with Family/Children	1	1 Day	Neutral	No	1	0	1	1	0	0	1	0	0	1	0	0	1	0	0	0	0	0	0	0	0	1	91	Ideal	Enumerator 4
NC2025-0649	Valid Samples	2025-07-16	Nanchang Changbei International Airport	Female	25–34years	Bachelor's degree	Visitors from Other Provinces in China	Airplane	Traveling with Friends	0	4–7 Days	Moderately Concerned	No	1	0	0	0	1	1	0	0	0	1	0	0	1	0	0	0	0	0	0	0	0	1	79	Very good	Enumerator 1
NC2025-0650	Valid Samples	2025-08-21	Nanchang East Railway Station	Male	18–24years	Bachelor's degree	Visitors from Other Provinces in China	High-Speed Rail / Train	Traveling with Family/Children	1	2–3 Days	Moderately Concerned	Yes	1	0	1	0	1	1	0	0	0	0	0	0	0	0	0	0	0	0	1	0	0	0	68	Good	Enumerator 3
NC2025-0651	Valid Samples	2025-08-16	Nanchang Railway Station	Male	45–59years	Bachelor's degree	Visitors from Other Provinces in China	High-Speed Rail / Train	Traveling with Friends	0	More than 7 Days	Neutral	No	1	1	1	0	0	0	0	0	0	0	0	1	1	0	1	0	0	0	0	0	0	1	60	Good	Enumerator 1
NC2025-0652	Valid Samples	2025-08-10	Nanchang Railway Station	Female	18–24years	High school or below	Visitors from Other Cities in Jiangxi Province	Long-Distance Bus	Traveling with Partner	1	2–3 Days	Moderately Concerned	Yes	1	0	1	0	0	1	1	0	0	1	0	1	0	0	0	0	1	0	0	0	0	0	72	Very good	Enumerator 1
NC2025-0653	Valid Samples	2025-07-23	Nanchang Railway Station	Male	25–34years	Bachelor's degree	Visitors from Other Provinces in China	Private Car	Traveling with Friends	2	2–3 Days	Neutral	Yes	1	0	1	0	0	0	1	0	0	0	0	1	0	0	1	1	0	0	1	0	0	0	50	Acceptable	Enumerator 3
NC2025-0654	Valid Samples	2025-07-22	Nanchang East Railway Station	Male	18–24years	Bachelor's degree	Visitors from Hong Kong, Macao, Taiwan, and Overseas	Private Car	Group Tour	0	2–3 Days	Very Concerned	No	0	1	0	0	0	0	1	1	0	0	0	1	1	1	0	1	0	0	0	0	0	1	75	Very good	Enumerator 2
NC2025-0655	Valid Samples	2025-08-09	Nanchang South Railway Station	Female	≥60years	Master's degree or above	Visitors from Other Provinces in China	High-Speed Rail / Train	Traveling Alone	2	2–3 Days	Not Concerned at All	No	1	0	1	0	0	0	0	0	0	1	0	0	0	0	0	1	0	0	0	0	0	1	77	Very good	Enumerator 4
NC2025-0656	Valid Samples	2025-08-29	Nanchang South Railway Station	Female	35–44years	Bachelor's degree	Visitors from Other Provinces in China	High-Speed Rail / Train	Traveling with Friends	1	4–7 Days	Neutral	Yes	1	0	1	1	1	0	0	0	0	1	0	1	1	0	0	1	0	0	0	0	0	0	85	Excellent	Enumerator 2
NC2025-0657	Valid Samples	2025-08-12	Nanchang East Railway Station	Female	25–34years	Associate degree	Visitors from Other Provinces in China	Private Car	Group Tour	0	4–7 Days	Slightly Concerned	No	0	0	0	1	0	0	0	0	0	1	0	1	0	0	0	0	0	0	0	0	0	1	84	Excellent	Enumerator 1
NC2025-0659	Valid Samples	2025-07-23	Nanchang Changbei International Airport	Male	35–44years	Bachelor's degree	Local Visitors from Nanchang	Airplane	Traveling with Friends	0	4–7 Days	Neutral	Yes	1	0	1	0	1	1	0	0	0	1	0	1	0	0	0	0	1	0	0	1	1	0	75	Very good	Enumerator 3
NC2025-0660	Valid Samples	2025-07-13	Nanchang Changbei International Airport	Female	25–34years	Associate degree	Visitors from Other Cities in Jiangxi Province	Private Car	Traveling with Family/Children	2	1 Day	Very Concerned	Yes	1	1	1	0	0	0	1	0	0	1	0	0	1	0	0	0	0	1	0	1	0	0	83	Excellent	Enumerator 4
NC2025-0661	Valid Samples	2025-07-23	Nanchang South Railway Station	Male	35–44years	Bachelor's degree	Visitors from Other Cities in Jiangxi Province	High-Speed Rail / Train	Traveling Alone	0	1 Day	Very Concerned	No	1	1	0	0	1	0	1	0	0	0	0	1	0	0	1	0	0	0	0	0	0	1	66	Good	Enumerator 2
NC2025-0662	Valid Samples	2025-07-30	Nanchang Changbei International Airport	Male	35–44years	Bachelor's degree	Visitors from Other Provinces in China	Airplane	Group Tour	0	More than 7 Days	Neutral	Yes	0	0	1	0	0	0	0	0	0	1	0	1	0	0	0	0	0	0	0	0	1	0	70	Very good	Enumerator 3
NC2025-0663	Valid Samples	2025-08-27	Nanchang Railway Station	Female	35–44years	Associate degree	Visitors from Other Provinces in China	High-Speed Rail / Train	Traveling with Friends	0	1 Day	Very Concerned	No	1	1	1	1	1	1	0	1	0	0	0	1	1	0	0	0	0	0	0	0	0	1	55	Acceptable	Enumerator 3
NC2025-0664	Valid Samples	2025-07-04	Nanchang West Railway Station	Female	18–24years	Associate degree	Visitors from Other Cities in Jiangxi Province	Private Car	Traveling with Partner	0	2–3 Days	Very Concerned	Yes	0	0	0	0	0	1	0	0	0	1	0	0	1	1	0	1	0	0	0	0	0	0	70	Very good	Enumerator 1
NC2025-0665	Valid Samples	2025-08-30	Nanchang Changbei International Airport	Male	18–24years	Master's degree or above	Visitors from Other Provinces in China	Private Car	Traveling with Partner	4	2–3 Days	Moderately Concerned	No	0	0	1	0	0	1	0	0	0	1	1	0	0	0	0	0	0	0	0	0	0	1	81	Excellent	Enumerator 3
NC2025-0666	Valid Samples	2025-08-15	Nanchang Railway Station	Male	18–24years	High school or below	Visitors from Other Provinces in China	High-Speed Rail / Train	Traveling with Partner	0	1 Day	Very Concerned	Yes	1	1	0	1	0	0	0	0	0	0	0	0	0	0	0	0	0	0	0	0	1	0	61	Good	Enumerator 4
NC2025-0667	Valid Samples	2025-07-21	Nanchang Changbei International Airport	Female	35–44years	Bachelor's degree	Visitors from Other Cities in Jiangxi Province	Airplane	Traveling with Friends	0	2–3 Days	Neutral	No	0	0	1	0	0	1	0	0	0	0	0	1	1	1	0	1	0	0	0	0	0	1	57	Acceptable	Enumerator 3
NC2025-0668	Valid Samples	2025-07-25	Nanchang Changbei International Airport	Male	18–24years	Bachelor's degree	Local Visitors from Nanchang	Airplane	Traveling with Partner	0	4–7 Days	Very Concerned	No	0	1	0	0	0	0	1	0	0	1	0	0	1	0	0	0	0	0	0	0	0	1	61	Good	Enumerator 1
NC2025-0669	Valid Samples	2025-07-31	Nanchang South Railway Station	Female	18–24years	Master's degree or above	Visitors from Other Cities in Jiangxi Province	High-Speed Rail / Train	Traveling with Partner	0	Less than Half a Day	Slightly Concerned	No	0	1	1	0	0	0	0	0	0	0	1	1	1	0	0	0	0	0	0	0	0	1	63	Good	Enumerator 4
NC2025-0670	Valid Samples	2025-08-01	Nanchang Changbei International Airport	Female	18–24years	Associate degree	Visitors from Other Cities in Jiangxi Province	Airplane	Traveling with Family/Children	0	1 Day	Very Concerned	Yes	1	0	0	0	0	0	1	0	0	0	0	0	0	0	0	0	0	0	0	0	0	0	51	Acceptable	Enumerator 3
NC2025-0671	Valid Samples	2025-07-11	Nanchang West Railway Station	Male	18–24years	Bachelor's degree	Visitors from Other Provinces in China	High-Speed Rail / Train	Traveling with Partner	3	1 Day	Very Concerned	No	1	0	0	0	0	0	0	0	0	0	1	0	0	0	0	0	0	0	0	0	0	1	65	Good	Enumerator 4
NC2025-0672	Valid Samples	2025-07-10	Nanchang Changbei International Airport	Female	35–44years	High school or below	Visitors from Other Provinces in China	Airplane	Traveling Alone	0	2–3 Days	Slightly Concerned	Yes	1	0	0	0	0	0	0	0	0	1	0	0	0	0	0	0	0	0	0	1	0	0	77	Very good	Enumerator 3
NC2025-0673	Valid Samples	2025-07-10	Nanchang Changbei International Airport	Female	18–24years	Master's degree or above	Visitors from Other Provinces in China	Airplane	Traveling with Friends	0	2–3 Days	Moderately Concerned	No	1	0	1	0	0	1	0	0	0	0	1	1	0	0	0	0	0	0	0	0	0	1	55	Acceptable	Enumerator 1
NC2025-0674	Valid Samples	2025-07-19	Nanchang East Railway Station	Female	18–24years	Bachelor's degree	Visitors from Other Cities in Jiangxi Province	High-Speed Rail / Train	Traveling with Family/Children	1	1 Day	Moderately Concerned	No	1	1	1	0	0	1	0	0	0	1	0	1	1	1	1	0	0	0	0	0	0	1	60	Good	Enumerator 1
NC2025-0675	Valid Samples	2025-07-23	Nanchang Railway Station	Female	25–34years	Bachelor's degree	Visitors from Other Provinces in China	High-Speed Rail / Train	Traveling with Family/Children	1	2–3 Days	Very Concerned	Yes	1	1	0	1	0	1	0	0	0	0	1	0	0	0	0	1	1	0	1	0	0	0	30	nfavorable	Enumerator 3
NC2025-0676	Valid Samples	2025-07-18	Nanchang West Railway Station	Male	35–44years	Associate degree	Visitors from Other Provinces in China	High-Speed Rail / Train	Traveling with Friends	0	2–3 Days	Moderately Concerned	No	1	0	1	0	0	0	1	1	0	1	1	0	0	1	0	0	0	0	0	0	0	1	63	Good	Enumerator 1
NC2025-0677	Valid Samples	2025-08-13	Nanchang Changbei International Airport	Female	25–34years	Master's degree or above	Visitors from Other Cities in Jiangxi Province	Airplane	Traveling with Family/Children	2	1 Day	Moderately Concerned	No	1	0	1	1	0	1	1	0	0	1	1	1	0	0	0	0	0	0	0	0	0	1	57	Acceptable	Enumerator 2
NC2025-0678	Valid Samples	2025-08-01	Nanchang West Railway Station	Male	18–24years	Bachelor's degree	Visitors from Other Provinces in China	Long-Distance Bus	Traveling with Friends	1	Less than Half a Day	Moderately Concerned	No	1	0	1	0	0	0	1	0	0	0	0	1	0	1	0	1	0	0	0	0	0	1	74	Very good	Enumerator 1
NC2025-0679	Valid Samples	2025-07-22	Nanchang East Railway Station	Female	45–59years	Bachelor's degree	Local Visitors from Nanchang	Private Car	Traveling with Family/Children	0	1 Day	Neutral	No	0	0	0	1	0	1	0	0	0	0	1	1	0	0	1	0	0	0	0	0	0	1	69	Good	Enumerator 4
NC2025-0681	Valid Samples	2025-07-17	Nanchang Changbei International Airport	Male	25–34years	High school or below	Local Visitors from Nanchang	Airplane	Traveling with Family/Children	2	4–7 Days	Moderately Concerned	No	1	1	0	0	0	0	0	0	0	1	1	0	1	0	0	0	0	0	0	0	0	1	69	Good	Enumerator 4
NC2025-0682	Valid Samples	2025-08-04	Nanchang East Railway Station	Male	35–44years	Bachelor's degree	Visitors from Other Cities in Jiangxi Province	High-Speed Rail / Train	Traveling Alone	0	2–3 Days	Moderately Concerned	Yes	1	1	0	0	1	0	0	1	0	1	0	1	1	0	0	0	0	0	1	0	0	0	86	Excellent	Enumerator 4
NC2025-0683	Valid Samples	2025-07-03	Nanchang West Railway Station	Female	25–34years	High school or below	Visitors from Other Cities in Jiangxi Province	Long-Distance Bus	Traveling with Friends	0	2–3 Days	Neutral	Yes	0	0	0	0	0	0	0	0	0	0	1	0	0	1	0	0	0	0	1	0	0	0	64	Good	Enumerator 2
NC2025-0684	Valid Samples	2025-07-12	Nanchang Changbei International Airport	Female	25–34years	Master's degree or above	Visitors from Other Cities in Jiangxi Province	Airplane	Traveling with Partner	4	2–3 Days	Neutral	No	0	0	1	0	1	0	0	0	0	1	0	1	1	1	1	1	0	0	0	0	0	1	62	Good	Enumerator 3
NC2025-0685	Valid Samples	2025-07-23	Nanchang West Railway Station	Male	25–34years	Master's degree or above	Visitors from Other Provinces in China	High-Speed Rail / Train	Traveling with Friends	0	4–7 Days	Moderately Concerned	No	1	0	1	0	1	0	0	1	0	1	0	1	0	0	0	0	0	0	0	0	0	1	72	Very good	Enumerator 3
NC2025-0686	Valid Samples	2025-07-21	Nanchang Railway Station	Male	25–34years	High school or below	Local Visitors from Nanchang	Private Car	Traveling with Partner	0	2–3 Days	Slightly Concerned	No	0	0	1	0	0	0	0	0	0	1	1	1	0	0	0	0	0	0	0	0	0	1	76	Very good	Enumerator 3
NC2025-0687	Valid Samples	2025-08-13	Nanchang West Railway Station	Male	25–34years	Bachelor's degree	Visitors from Other Cities in Jiangxi Province	High-Speed Rail / Train	Traveling with Friends	0	2–3 Days	Very Concerned	No	0	1	1	0	0	0	1	0	0	1	1	1	1	0	0	0	0	0	0	0	0	1	64	Good	Enumerator 4
NC2025-0688	Valid Samples	2025-07-22	Nanchang East Railway Station	Female	18–24years	Bachelor's degree	Visitors from Other Provinces in China	High-Speed Rail / Train	Traveling with Family/Children	2	4–7 Days	Very Concerned	No	1	1	1	0	0	1	1	0	0	0	0	0	0	0	1	1	0	0	0	0	0	1	49	Marginal	Enumerator 2
NC2025-0689	Valid Samples	2025-07-28	Nanchang East Railway Station	Female	35–44years	Associate degree	Visitors from Other Provinces in China	High-Speed Rail / Train	Traveling with Friends	0	1 Day	Moderately Concerned	No	0	1	1	1	0	0	0	0	0	1	0	1	0	1	0	0	0	0	0	0	0	1	55	Acceptable	Enumerator 3
NC2025-0690	Valid Samples	2025-07-09	Nanchang West Railway Station	Female	25–34years	Bachelor's degree	Visitors from Other Provinces in China	Local Public Transportation	Group Tour	0	2–3 Days	Moderately Concerned	Yes	1	0	1	1	1	0	0	0	0	0	1	0	1	0	0	0	0	0	1	0	0	0	78	Very good	Enumerator 2
NC2025-0691	Valid Samples	2025-07-04	Nanchang Changbei International Airport	Male	18–24years	Bachelor's degree	Local Visitors from Nanchang	Private Car	Traveling Alone	0	1 Day	Moderately Concerned	Yes	0	0	1	1	1	1	0	0	0	0	0	0	0	0	0	1	1	0	0	0	0	0	56	Acceptable	Enumerator 3
NC2025-0692	Valid Samples	2025-08-27	Nanchang East Railway Station	Female	35–44years	Associate degree	Visitors from Other Provinces in China	High-Speed Rail / Train	Traveling with Partner	0	1 Day	Very Concerned	Yes	0	1	0	0	0	1	0	0	0	1	0	0	0	0	1	0	0	0	0	0	1	0	55	Acceptable	Enumerator 2
NC2025-0693	Valid Samples	2025-08-03	Nanchang West Railway Station	Female	25–34years	Associate degree	Visitors from Other Cities in Jiangxi Province	Local Public Transportation	Traveling Alone	0	2–3 Days	Neutral	No	0	1	0	0	0	0	0	0	0	1	0	1	1	0	1	0	0	0	0	0	0	1	58	Acceptable	Enumerator 2
NC2025-0694	Valid Samples	2025-08-08	Nanchang Railway Station	Male	18–24years	Master's degree or above	Visitors from Other Provinces in China	Private Car	Traveling with Partner	2	2–3 Days	Very Concerned	Yes	0	0	0	1	1	1	0	0	0	1	0	0	1	0	0	0	0	0	1	0	0	0	100	Ideal	Enumerator 3
NC2025-0695	Valid Samples	2025-08-16	Nanchang West Railway Station	Male	18–24years	Bachelor's degree	Visitors from Other Cities in Jiangxi Province	High-Speed Rail / Train	Group Tour	0	1 Day	Neutral	Yes	0	1	0	0	0	0	0	0	0	1	0	0	0	0	0	0	1	1	0	0	0	0	35	nfavorable	Enumerator 3
NC2025-0696	Valid Samples	2025-08-03	Nanchang East Railway Station	Female	45–59years	Master's degree or above	Visitors from Other Provinces in China	High-Speed Rail / Train	Traveling with Partner	0	1 Day	Moderately Concerned	Yes	1	1	1	1	0	0	0	0	0	1	1	1	1	0	1	0	0	1	1	0	0	0	74	Very good	Enumerator 4
NC2025-0697	Valid Samples	2025-07-26	Nanchang South Railway Station	Male	35–44years	Bachelor's degree	Visitors from Other Provinces in China	High-Speed Rail / Train	Traveling with Friends	0	Less than Half a Day	Very Concerned	Yes	1	1	0	0	0	1	0	0	0	0	0	1	0	0	0	0	0	0	0	0	0	0	54	Acceptable	Enumerator 3
NC2025-0698	Valid Samples	2025-07-22	Nanchang East Railway Station	Male	25–34years	Bachelor's degree	Visitors from Other Provinces in China	High-Speed Rail / Train	Traveling Alone	0	2–3 Days	Very Concerned	Yes	0	0	1	0	1	1	0	0	0	1	1	1	0	0	1	0	1	0	0	0	0	0	79	Very good	Enumerator 3
NC2025-0700	Valid Samples	2025-07-13	Nanchang Railway Station	Male	35–44years	Associate degree	Visitors from Other Provinces in China	High-Speed Rail / Train	Traveling Alone	0	1 Day	Neutral	Yes	1	0	0	0	1	0	0	0	1	1	0	0	0	1	0	0	0	0	0	0	0	0	50	Acceptable	Enumerator 4
NC2025-0701	Valid Samples	2025-07-21	Nanchang West Railway Station	Female	18–24years	Bachelor's degree	Visitors from Other Provinces in China	Private Car	Traveling with Friends	1	1 Day	Neutral	Yes	1	0	1	0	0	1	0	0	0	1	1	0	1	0	0	0	1	1	0	0	0	0	83	Excellent	Enumerator 4
NC2025-0702	Valid Samples	2025-08-12	Nanchang South Railway Station	Female	25–34years	Associate degree	Visitors from Other Provinces in China	High-Speed Rail / Train	Traveling with Friends	0	2–3 Days	Not Concerned at All	No	0	0	0	0	1	1	0	0	0	1	0	1	0	0	0	0	0	0	0	0	0	1	94	Ideal	Enumerator 4
NC2025-0703	Valid Samples	2025-06-30	Nanchang East Railway Station	Female	18–24years	High school or below	Visitors from Other Provinces in China	High-Speed Rail / Train	Traveling with Family/Children	0	4–7 Days	Moderately Concerned	No	1	0	0	0	0	1	0	0	0	1	0	1	1	0	0	0	0	0	0	0	0	1	80	Excellent	Enumerator 2
NC2025-0704	Valid Samples	2025-08-09	Nanchang Railway Station	Female	25–34years	High school or below	Visitors from Other Provinces in China	Long-Distance Bus	Traveling with Family/Children	4	Less than Half a Day	Moderately Concerned	No	0	1	0	1	0	0	0	0	0	0	1	1	0	1	0	0	0	0	0	0	0	1	75	Very good	Enumerator 2
NC2025-0705	Valid Samples	2025-07-29	Nanchang South Railway Station	Female	45–59years	Bachelor's degree	Visitors from Other Provinces in China	High-Speed Rail / Train	Traveling with Family/Children	0	1 Day	Neutral	No	0	0	1	1	1	0	0	1	0	0	0	1	0	1	0	0	0	0	0	0	0	1	37	nfavorable	Enumerator 3
NC2025-0706	Valid Samples	2025-08-15	Nanchang Railway Station	Male	18–24years	Associate degree	Visitors from Hong Kong, Macao, Taiwan, and Overseas	High-Speed Rail / Train	Group Tour	0	4–7 Days	Moderately Concerned	No	1	1	0	1	0	0	0	0	0	1	0	0	0	0	0	0	0	0	0	0	0	1	69	Good	Enumerator 4
NC2025-0707	Valid Samples	2025-08-28	Nanchang West Railway Station	Female	35–44years	Master's degree or above	Visitors from Other Cities in Jiangxi Province	High-Speed Rail / Train	Traveling with Friends	0	2–3 Days	Very Concerned	No	1	0	0	1	0	0	0	0	0	1	1	1	0	0	0	0	0	0	0	0	0	1	80	Excellent	Enumerator 4
NC2025-0708	Valid Samples	2025-07-25	Nanchang West Railway Station	Female	25–34years	Associate degree	Visitors from Other Provinces in China	High-Speed Rail / Train	Traveling with Friends	0	2–3 Days	Neutral	Yes	1	1	1	1	0	1	0	0	0	0	0	0	0	0	0	0	1	0	0	0	0	0	56	Acceptable	Enumerator 3
NC2025-0710	Valid Samples	2025-08-07	Nanchang Changbei International Airport	Male	25–34years	Bachelor's degree	Visitors from Other Provinces in China	Airplane	Traveling Alone	1	2–3 Days	Moderately Concerned	Yes	0	0	0	1	0	1	0	0	0	1	1	0	1	0	0	0	1	0	0	1	0	0	71	Very good	Enumerator 1
NC2025-0711	Valid Samples	2025-08-09	Nanchang East Railway Station	Female	18–24years	Bachelor's degree	Visitors from Other Provinces in China	Private Car	Traveling with Friends	0	2–3 Days	Neutral	No	1	0	1	1	1	1	0	0	0	1	0	1	0	0	1	0	0	0	0	0	0	1	71	Very good	Enumerator 3
NC2025-0712	Valid Samples	2025-08-21	Nanchang East Railway Station	Female	18–24years	High school or below	Visitors from Other Provinces in China	Private Car	Traveling Alone	0	1 Day	Neutral	No	1	0	1	0	0	0	0	0	0	1	0	0	0	0	0	0	0	0	0	0	0	1	81	Excellent	Enumerator 1
NC2025-0713	Valid Samples	2025-07-01	Nanchang East Railway Station	Female	45–59years	Bachelor's degree	Visitors from Other Provinces in China	High-Speed Rail / Train	Traveling Alone	0	1 Day	Moderately Concerned	No	1	0	1	0	0	1	0	0	0	0	0	0	1	1	1	0	0	0	0	0	0	1	65	Good	Enumerator 1
NC2025-0714	Valid Samples	2025-07-05	Nanchang West Railway Station	Female	35–44years	Associate degree	Visitors from Other Provinces in China	High-Speed Rail / Train	Traveling with Friends	0	Less than Half a Day	Moderately Concerned	No	0	0	1	0	0	0	0	0	0	0	0	1	0	1	0	0	0	0	0	0	0	1	80	Excellent	Enumerator 1
NC2025-0715	Valid Samples	2025-08-04	Nanchang Railway Station	Female	25–34years	Bachelor's degree	Visitors from Other Provinces in China	Private Car	Traveling with Friends	1	1 Day	Moderately Concerned	Yes	0	1	1	0	1	0	1	0	0	1	0	0	1	1	0	0	1	0	0	0	1	0	62	Good	Enumerator 2
NC2025-0716	Valid Samples	2025-08-03	Nanchang East Railway Station	Male	25–34years	Bachelor's degree	Visitors from Other Cities in Jiangxi Province	High-Speed Rail / Train	Traveling with Family/Children	2	1 Day	Very Concerned	Yes	1	0	1	0	0	0	0	0	0	1	0	1	1	0	0	1	0	1	0	1	0	0	51	Acceptable	Enumerator 3
NC2025-0717	Valid Samples	2025-08-14	Nanchang West Railway Station	Female	18–24years	Associate degree	Visitors from Other Provinces in China	High-Speed Rail / Train	Traveling with Friends	0	2–3 Days	Moderately Concerned	No	1	1	1	1	0	0	0	0	0	1	0	0	1	0	0	0	0	0	0	0	0	1	86	Excellent	Enumerator 2
NC2025-0718	Valid Samples	2025-08-07	Nanchang Changbei International Airport	Male	45–59years	Bachelor's degree	Local Visitors from Nanchang	Airplane	Group Tour	1	4–7 Days	Very Concerned	No	1	0	0	0	1	1	0	0	0	1	0	1	0	0	0	0	0	0	0	0	0	1	78	Very good	Enumerator 1
NC2025-0720	Valid Samples	2025-08-30	Nanchang Railway Station	Male	18–24years	Associate degree	Visitors from Other Provinces in China	High-Speed Rail / Train	Traveling with Friends	0	1 Day	Neutral	Yes	1	1	0	0	1	1	0	0	0	0	1	1	0	0	0	0	0	0	1	0	0	0	48	Marginal	Enumerator 2
NC2025-0721	Valid Samples	2025-07-18	Nanchang East Railway Station	Male	25–34years	Master's degree or above	Visitors from Other Cities in Jiangxi Province	High-Speed Rail / Train	Traveling with Partner	0	4–7 Days	Slightly Concerned	No	1	1	1	1	0	1	0	0	0	1	0	1	0	1	0	1	0	0	0	0	0	1	83	Excellent	Enumerator 4
NC2025-0722	Valid Samples	2025-08-04	Nanchang Changbei International Airport	Female	45–59years	High school or below	Visitors from Other Provinces in China	Private Car	Traveling with Family/Children	0	1 Day	Very Concerned	No	1	1	0	0	0	1	0	0	0	1	0	0	0	0	0	1	0	0	0	0	0	1	80	Excellent	Enumerator 3
NC2025-0723	Valid Samples	2025-08-11	Nanchang East Railway Station	Female	25–34years	Bachelor's degree	Visitors from Other Provinces in China	High-Speed Rail / Train	Traveling Alone	0	2–3 Days	Neutral	No	1	1	1	1	0	0	1	0	0	0	0	1	1	0	0	1	0	0	0	0	0	1	74	Very good	Enumerator 3
NC2025-0724	Valid Samples	2025-08-19	Nanchang East Railway Station	Female	18–24years	Master's degree or above	Visitors from Other Cities in Jiangxi Province	Private Car	Traveling with Family/Children	0	4–7 Days	Moderately Concerned	No	1	1	1	1	0	1	0	0	0	1	0	1	0	0	0	0	0	0	0	0	0	1	66	Good	Enumerator 3
NC2025-0725	Valid Samples	2025-08-29	Nanchang West Railway Station	Female	35–44years	High school or below	Visitors from Other Cities in Jiangxi Province	High-Speed Rail / Train	Traveling Alone	0	2–3 Days	Neutral	No	0	0	0	0	0	1	0	1	0	0	1	1	0	1	1	1	0	0	0	0	0	1	56	Acceptable	Enumerator 3
NC2025-0726	Valid Samples	2025-08-29	Nanchang East Railway Station	Male	35–44years	High school or below	Visitors from Other Provinces in China	High-Speed Rail / Train	Traveling with Partner	0	4–7 Days	Neutral	No	0	1	1	0	1	1	1	0	0	0	0	1	0	0	0	0	0	0	0	0	0	1	66	Good	Enumerator 1
NC2025-0727	Valid Samples	2025-08-06	Nanchang West Railway Station	Male	18–24years	High school or below	Visitors from Other Cities in Jiangxi Province	Private Car	Traveling with Partner	0	4–7 Days	Neutral	Yes	1	0	1	0	0	0	1	0	0	1	1	1	0	0	0	0	0	0	0	0	0	0	74	Very good	Enumerator 1
NC2025-0728	Valid Samples	2025-08-20	Nanchang South Railway Station	Male	25–34years	High school or below	Visitors from Other Cities in Jiangxi Province	High-Speed Rail / Train	Traveling with Partner	1	2–3 Days	Very Concerned	No	1	1	1	0	0	0	0	0	0	0	0	1	1	0	0	0	0	0	0	0	0	1	73	Very good	Enumerator 3
NC2025-0729	Valid Samples	2025-07-07	Nanchang East Railway Station	Female	18–24years	Master's degree or above	Local Visitors from Nanchang	High-Speed Rail / Train	Traveling with Family/Children	0	1 Day	Very Concerned	Yes	1	0	1	0	0	0	0	0	0	1	0	1	1	0	0	0	0	0	1	0	0	0	71	Very good	Enumerator 2
NC2025-0730	Valid Samples	2025-08-16	Nanchang South Railway Station	Female	25–34years	High school or below	Visitors from Other Provinces in China	High-Speed Rail / Train	Traveling with Friends	0	4–7 Days	Moderately Concerned	Yes	0	0	1	0	0	0	1	0	0	1	1	1	0	0	0	0	0	0	0	0	0	0	59	Acceptable	Enumerator 1
NC2025-0731	Valid Samples	2025-08-29	Nanchang South Railway Station	Male	18–24years	Associate degree	Visitors from Other Provinces in China	High-Speed Rail / Train	Traveling with Friends	1	Less than Half a Day	Slightly Concerned	No	1	0	0	0	0	0	1	0	0	1	1	1	0	1	1	1	0	0	0	0	0	1	93	Ideal	Enumerator 4
NC2025-0732	Valid Samples	2025-08-02	Nanchang Railway Station	Female	35–44years	Bachelor's degree	Visitors from Other Provinces in China	Private Car	Traveling with Family/Children	4	2–3 Days	Moderately Concerned	No	1	0	1	0	0	0	1	0	0	1	0	1	1	0	0	0	0	0	0	0	0	1	78	Very good	Enumerator 2
NC2025-0733	Valid Samples	2025-08-17	Nanchang Railway Station	Female	35–44years	Associate degree	Visitors from Other Provinces in China	High-Speed Rail / Train	Traveling with Friends	0	4–7 Days	Neutral	Yes	1	0	0	0	0	0	1	0	1	0	0	0	1	0	0	0	0	0	0	0	0	0	66	Good	Enumerator 4
NC2025-0734	Valid Samples	2025-07-04	Nanchang South Railway Station	Female	45–59years	Bachelor's degree	Visitors from Other Provinces in China	High-Speed Rail / Train	Traveling with Partner	0	Less than Half a Day	Moderately Concerned	Yes	1	1	1	1	0	0	0	0	0	1	1	1	1	0	0	1	1	0	0	0	0	0	52	Acceptable	Enumerator 2
NC2025-0735	Valid Samples	2025-07-31	Nanchang East Railway Station	Female	25–34years	High school or below	Local Visitors from Nanchang	Private Car	Traveling with Partner	0	1 Day	Not Concerned at All	Yes	1	0	0	0	0	1	1	0	0	0	0	1	1	1	0	0	0	0	1	1	0	0	63	Good	Enumerator 2
NC2025-0736	Valid Samples	2025-07-27	Nanchang Railway Station	Female	35–44years	Associate degree	Visitors from Other Cities in Jiangxi Province	High-Speed Rail / Train	Traveling with Family/Children	0	More than 7 Days	Moderately Concerned	Yes	1	1	0	0	1	1	0	0	0	1	1	1	1	0	0	1	0	0	0	0	0	0	55	Acceptable	Enumerator 4
NC2025-0737	Valid Samples	2025-08-24	Nanchang East Railway Station	Male	45–59years	Master's degree or above	Visitors from Other Provinces in China	High-Speed Rail / Train	Traveling with Partner	1	2–3 Days	Very Concerned	Yes	0	0	0	1	0	0	0	0	0	1	0	0	0	0	1	0	0	0	0	0	0	0	52	Acceptable	Enumerator 4
NC2025-0738	Valid Samples	2025-08-21	Nanchang Railway Station	Male	25–34years	Bachelor's degree	Visitors from Other Provinces in China	High-Speed Rail / Train	Traveling with Friends	0	1 Day	Very Concerned	Yes	1	0	0	0	0	0	0	0	0	0	0	0	1	0	0	0	1	0	0	0	0	0	49	Marginal	Enumerator 3
NC2025-0740	Valid Samples	2025-08-08	Nanchang West Railway Station	Male	18–24years	Bachelor's degree	Local Visitors from Nanchang	High-Speed Rail / Train	Traveling with Friends	0	2–3 Days	Neutral	Yes	0	1	1	0	0	1	0	0	0	1	1	0	0	0	0	0	0	0	0	0	0	0	66	Good	Enumerator 4
NC2025-0742	Valid Samples	2025-08-03	Nanchang South Railway Station	Male	45–59years	Bachelor's degree	Visitors from Other Provinces in China	High-Speed Rail / Train	Traveling with Partner	0	4–7 Days	Moderately Concerned	Yes	1	1	0	0	1	0	0	0	0	0	1	0	1	0	0	0	1	1	0	0	0	0	53	Acceptable	Enumerator 3
NC2025-0743	Valid Samples	2025-07-11	Nanchang West Railway Station	Male	25–34years	Bachelor's degree	Visitors from Other Provinces in China	High-Speed Rail / Train	Traveling with Family/Children	0	Less than Half a Day	Slightly Concerned	No	0	0	0	0	0	0	0	0	0	1	1	0	1	0	0	0	0	0	0	0	0	1	72	Very good	Enumerator 4
NC2025-0744	Valid Samples	2025-07-08	Nanchang East Railway Station	Male	18–24years	Bachelor's degree	Visitors from Other Cities in Jiangxi Province	Private Car	Traveling with Friends	0	1 Day	Moderately Concerned	Yes	1	0	0	1	1	0	0	0	0	1	1	1	0	0	0	1	0	0	0	0	0	0	35	nfavorable	Enumerator 2
NC2025-0745	Valid Samples	2025-08-19	Nanchang Railway Station	Male	35–44years	Associate degree	Visitors from Other Cities in Jiangxi Province	High-Speed Rail / Train	Group Tour	0	Less than Half a Day	Moderately Concerned	Yes	1	1	1	0	0	0	0	0	0	1	1	1	0	0	0	0	1	0	0	0	0	0	72	Very good	Enumerator 4
NC2025-0746	Valid Samples	2025-08-15	Nanchang South Railway Station	Female	18–24years	Associate degree	Visitors from Other Provinces in China	High-Speed Rail / Train	Traveling with Friends	0	1 Day	Moderately Concerned	No	1	0	1	0	0	1	1	0	0	0	1	0	1	0	0	0	0	0	0	0	0	1	67	Good	Enumerator 4
NC2025-0747	Valid Samples	2025-08-30	Nanchang Changbei International Airport	Female	18–24years	Bachelor's degree	Visitors from Other Cities in Jiangxi Province	Airplane	Group Tour	1	2–3 Days	Neutral	Yes	0	0	1	1	0	0	0	0	0	0	0	1	0	0	1	0	0	1	0	0	0	0	72	Very good	Enumerator 3
NC2025-0748	Valid Samples	2025-07-21	Nanchang Railway Station	Female	25–34years	Associate degree	Visitors from Other Provinces in China	Private Car	Traveling with Friends	0	2–3 Days	Moderately Concerned	No	1	0	0	0	1	0	0	0	0	0	1	0	0	0	0	0	0	0	0	0	0	1	85	Excellent	Enumerator 3
NC2025-0749	Valid Samples	2025-08-17	Nanchang West Railway Station	Male	18–24years	Bachelor's degree	Visitors from Other Provinces in China	Local Public Transportation	Traveling with Family/Children	2	Less than Half a Day	Neutral	No	1	0	0	0	0	1	0	0	0	1	0	1	1	0	1	0	0	0	0	0	0	1	60	Good	Enumerator 4
NC2025-0750	Valid Samples	2025-07-22	Nanchang West Railway Station	Female	18–24years	High school or below	Visitors from Other Provinces in China	Private Car	Traveling with Partner	1	1 Day	Moderately Concerned	Yes	1	0	0	0	1	1	0	0	0	1	0	1	1	0	0	0	0	0	1	0	0	0	61	Good	Enumerator 2
NC2025-0751	Valid Samples	2025-08-05	Nanchang Railway Station	Female	45–59years	Associate degree	Visitors from Other Provinces in China	Local Public Transportation	Group Tour	2	1 Day	Very Concerned	Yes	0	1	1	0	0	0	0	0	0	0	1	1	1	0	0	0	0	0	0	0	0	0	88	Excellent	Enumerator 4
NC2025-0752	Valid Samples	2025-08-02	Nanchang Railway Station	Female	35–44years	Associate degree	Local Visitors from Nanchang	Private Car	Traveling with Partner	0	2–3 Days	Neutral	No	1	0	1	0	0	0	0	1	0	1	1	0	0	0	1	0	0	0	0	0	0	1	74	Very good	Enumerator 4
NC2025-0753	Valid Samples	2025-08-04	Nanchang Changbei International Airport	Male	35–44years	Bachelor's degree	Visitors from Other Cities in Jiangxi Province	Airplane	Traveling Alone	0	2–3 Days	Moderately Concerned	No	1	0	1	1	0	0	1	1	0	1	0	0	1	0	0	0	0	0	0	0	0	1	75	Very good	Enumerator 2
NC2025-0754	Valid Samples	2025-08-24	Nanchang Railway Station	Female	25–34years	Bachelor's degree	Visitors from Other Cities in Jiangxi Province	High-Speed Rail / Train	Traveling with Friends	0	1 Day	Neutral	No	0	0	1	0	1	0	0	1	0	0	0	0	0	1	0	0	0	0	0	0	0	1	93	Ideal	Enumerator 1
NC2025-0755	Valid Samples	2025-07-10	Nanchang Railway Station	Male	25–34years	Master's degree or above	Visitors from Other Provinces in China	High-Speed Rail / Train	Traveling Alone	2	1 Day	Neutral	No	1	1	0	0	1	1	0	0	0	1	0	1	1	0	0	0	0	0	0	0	0	1	66	Good	Enumerator 4
NC2025-0756	Valid Samples	2025-07-24	Nanchang West Railway Station	Female	35–44years	Bachelor's degree	Local Visitors from Nanchang	High-Speed Rail / Train	Traveling with Friends	0	1 Day	Very Concerned	Yes	1	1	0	1	1	1	0	0	0	0	1	1	1	0	0	1	1	0	0	0	0	0	68	Good	Enumerator 1
NC2025-0757	Valid Samples	2025-08-26	Nanchang West Railway Station	Female	35–44years	Master's degree or above	Visitors from Other Provinces in China	Long-Distance Bus	Traveling with Family/Children	0	4–7 Days	Moderately Concerned	Yes	0	1	1	0	0	0	0	0	0	1	1	0	1	1	0	0	0	1	1	0	1	0	59	Acceptable	Enumerator 3
NC2025-0758	Valid Samples	2025-07-05	Nanchang Changbei International Airport	Male	25–34years	Associate degree	Visitors from Other Cities in Jiangxi Province	Airplane	Traveling Alone	0	1 Day	Neutral	No	1	1	1	0	1	1	1	0	0	1	0	0	0	0	0	0	0	0	0	0	0	1	64	Good	Enumerator 2
NC2025-0759	Valid Samples	2025-08-25	Nanchang South Railway Station	Male	25–34years	Bachelor's degree	Visitors from Other Cities in Jiangxi Province	High-Speed Rail / Train	Group Tour	0	1 Day	Very Concerned	Yes	1	1	1	1	1	0	0	0	0	1	0	0	1	0	0	0	0	0	0	0	0	0	46	Marginal	Enumerator 4
NC2025-0760	Valid Samples	2025-07-20	Nanchang Railway Station	Female	18–24years	Bachelor's degree	Visitors from Other Cities in Jiangxi Province	High-Speed Rail / Train	Traveling with Friends	0	1 Day	Very Concerned	Yes	0	0	0	1	0	0	1	0	0	1	1	0	0	0	0	0	0	0	0	0	0	0	77	Very good	Enumerator 1
NC2025-0761	Valid Samples	2025-08-03	Nanchang Railway Station	Male	25–34years	High school or below	Visitors from Other Cities in Jiangxi Province	High-Speed Rail / Train	Traveling with Friends	0	1 Day	Moderately Concerned	No	1	0	0	1	0	1	0	0	0	0	1	0	0	0	1	0	0	0	0	0	0	1	44	Marginal	Enumerator 3
NC2025-0762	Valid Samples	2025-07-06	Nanchang Changbei International Airport	Female	18–24years	Master's degree or above	Local Visitors from Nanchang	Airplane	Traveling with Partner	2	2–3 Days	Very Concerned	No	0	0	1	0	0	0	0	0	0	1	1	1	1	1	0	0	0	0	0	0	0	1	56	Acceptable	Enumerator 4
NC2025-0763	Valid Samples	2025-08-04	Nanchang Railway Station	Female	25–34years	High school or below	Visitors from Other Cities in Jiangxi Province	High-Speed Rail / Train	Traveling with Family/Children	1	1 Day	Moderately Concerned	Yes	1	0	0	1	0	1	0	0	0	0	0	0	1	0	0	0	0	0	0	0	0	0	69	Good	Enumerator 2
NC2025-0764	Valid Samples	2025-08-05	Nanchang East Railway Station	Male	25–34years	High school or below	Visitors from Other Provinces in China	High-Speed Rail / Train	Traveling with Friends	2	Less than Half a Day	Not Concerned at All	Yes	0	0	1	1	0	1	0	0	0	1	1	0	0	0	1	0	1	0	0	0	0	0	76	Very good	Enumerator 1
NC2025-0765	Valid Samples	2025-08-27	Nanchang East Railway Station	Female	18–24years	Bachelor's degree	Visitors from Other Provinces in China	High-Speed Rail / Train	Traveling Alone	0	1 Day	Neutral	Yes	1	0	0	0	1	0	0	0	0	0	1	0	0	1	0	1	0	0	1	0	0	0	53	Acceptable	Enumerator 1
NC2025-0766	Valid Samples	2025-07-25	Nanchang West Railway Station	Female	25–34years	Bachelor's degree	Visitors from Other Provinces in China	Long-Distance Bus	Traveling with Partner	0	1 Day	Neutral	Yes	1	0	1	0	0	0	0	0	0	0	1	1	1	0	0	0	1	0	0	0	1	0	46	Marginal	Enumerator 4
NC2025-0767	Valid Samples	2025-08-20	Nanchang West Railway Station	Male	≥60years	Bachelor's degree	Visitors from Other Cities in Jiangxi Province	High-Speed Rail / Train	Traveling with Friends	0	1 Day	Moderately Concerned	No	1	1	0	0	0	1	0	0	0	1	1	1	1	1	1	0	0	0	0	0	0	1	59	Acceptable	Enumerator 1
NC2025-0768	Valid Samples	2025-07-13	Nanchang Railway Station	Female	25–34years	Associate degree	Visitors from Other Provinces in China	High-Speed Rail / Train	Traveling with Friends	2	2–3 Days	Moderately Concerned	Yes	1	1	1	0	0	0	0	0	0	1	1	0	0	0	0	1	1	0	1	0	0	0	67	Good	Enumerator 2
NC2025-0770	Valid Samples	2025-08-30	Nanchang East Railway Station	Female	18–24years	Master's degree or above	Visitors from Other Cities in Jiangxi Province	High-Speed Rail / Train	Traveling with Friends	0	2–3 Days	Moderately Concerned	No	1	1	1	0	0	1	1	0	0	1	0	0	1	1	0	1	0	0	0	0	0	1	81	Excellent	Enumerator 3
NC2025-0771	Valid Samples	2025-08-20	Nanchang East Railway Station	Female	18–24years	Bachelor's degree	Visitors from Other Provinces in China	Private Car	Traveling with Partner	0	1 Day	Very Concerned	Yes	1	0	1	1	0	0	0	0	0	1	0	0	1	1	0	0	0	0	1	1	1	0	68	Good	Enumerator 3
NC2025-0772	Valid Samples	2025-07-07	Nanchang Changbei International Airport	Male	45–59years	High school or below	Visitors from Other Cities in Jiangxi Province	Airplane	Traveling with Family/Children	1	4–7 Days	Moderately Concerned	No	1	0	0	1	0	0	0	0	0	0	0	1	0	0	0	1	0	0	0	0	0	1	84	Excellent	Enumerator 4
NC2025-0773	Valid Samples	2025-07-15	Nanchang Railway Station	Male	25–34years	Master's degree or above	Visitors from Other Provinces in China	Long-Distance Bus	Traveling Alone	0	2–3 Days	Moderately Concerned	Yes	1	0	0	0	0	1	0	0	0	1	0	0	1	0	0	0	1	0	0	0	0	0	70	Very good	Enumerator 4
NC2025-0774	Valid Samples	2025-08-04	Nanchang South Railway Station	Male	25–34years	Master's degree or above	Visitors from Other Cities in Jiangxi Province	High-Speed Rail / Train	Group Tour	1	1 Day	Moderately Concerned	Yes	1	1	1	1	1	1	0	0	0	0	1	1	1	0	0	0	0	0	0	1	0	0	63	Good	Enumerator 3
NC2025-0775	Valid Samples	2025-07-07	Nanchang Changbei International Airport	Male	45–59years	Associate degree	Local Visitors from Nanchang	Private Car	Traveling with Family/Children	1	1 Day	Moderately Concerned	Yes	1	0	1	0	0	0	0	0	0	1	0	0	0	0	0	0	0	0	0	0	1	0	60	Good	Enumerator 2
NC2025-0776	Valid Samples	2025-08-10	Nanchang West Railway Station	Female	≥60years	Master's degree or above	Visitors from Other Cities in Jiangxi Province	Local Public Transportation	Traveling Alone	0	Less than Half a Day	Moderately Concerned	No	0	1	1	1	1	0	0	0	0	1	1	1	0	0	0	0	0	0	0	0	0	1	67	Good	Enumerator 3
NC2025-0777	Valid Samples	2025-07-08	Nanchang Railway Station	Male	45–59years	Bachelor's degree	Visitors from Other Provinces in China	High-Speed Rail / Train	Traveling with Family/Children	0	Less than Half a Day	Moderately Concerned	Yes	0	1	0	0	1	0	0	0	0	0	0	1	0	0	0	1	0	0	0	1	0	0	70	Very good	Enumerator 1
NC2025-0778	Valid Samples	2025-07-18	Nanchang Changbei International Airport	Female	45–59years	Master's degree or above	Visitors from Other Cities in Jiangxi Province	Airplane	Traveling Alone	0	4–7 Days	Moderately Concerned	Yes	0	0	0	1	1	1	0	0	0	0	0	0	0	0	0	1	0	0	0	0	0	0	65	Good	Enumerator 2
NC2025-0779	Valid Samples	2025-08-23	Nanchang West Railway Station	Female	18–24years	Bachelor's degree	Visitors from Other Provinces in China	High-Speed Rail / Train	Traveling with Partner	1	4–7 Days	Moderately Concerned	No	1	1	0	0	0	1	0	0	0	0	0	1	0	0	0	0	0	0	0	0	0	1	66	Good	Enumerator 4
NC2025-0780	Valid Samples	2025-08-13	Nanchang West Railway Station	Male	45–59years	Bachelor's degree	Visitors from Other Cities in Jiangxi Province	Private Car	Traveling with Family/Children	1	4–7 Days	Very Concerned	No	0	0	0	1	0	1	0	0	0	1	0	0	1	0	1	0	0	0	0	0	0	1	77	Very good	Enumerator 2
NC2025-0781	Valid Samples	2025-07-01	Nanchang Changbei International Airport	Male	45–59years	Bachelor's degree	Visitors from Other Cities in Jiangxi Province	Private Car	Traveling with Friends	0	1 Day	Moderately Concerned	No	0	0	0	0	1	1	0	0	0	1	1	0	0	0	0	0	0	0	0	0	0	1	68	Good	Enumerator 3
NC2025-0782	Valid Samples	2025-08-25	Nanchang Changbei International Airport	Male	18–24years	Bachelor's degree	Visitors from Other Cities in Jiangxi Province	Airplane	Traveling with Family/Children	2	1 Day	Neutral	No	0	0	0	0	0	1	0	0	0	1	0	0	1	0	0	1	0	0	0	0	0	1	58	Acceptable	Enumerator 2
NC2025-0783	Valid Samples	2025-07-09	Nanchang West Railway Station	Female	25–34years	Bachelor's degree	Visitors from Other Provinces in China	Long-Distance Bus	Traveling with Family/Children	1	1 Day	Moderately Concerned	No	1	0	1	0	0	1	0	0	0	1	1	1	0	1	0	0	0	0	0	0	0	1	66	Good	Enumerator 4
NC2025-0784	Valid Samples	2025-08-16	Nanchang Railway Station	Male	25–34years	Associate degree	Visitors from Other Provinces in China	High-Speed Rail / Train	Traveling with Partner	3	1 Day	Very Concerned	Yes	1	0	1	1	0	0	1	0	0	1	0	0	1	1	0	0	0	1	1	0	1	0	65	Good	Enumerator 2
NC2025-0785	Valid Samples	2025-08-04	Nanchang Railway Station	Female	25–34years	Associate degree	Visitors from Other Provinces in China	High-Speed Rail / Train	Traveling Alone	0	2–3 Days	Moderately Concerned	Yes	0	1	0	0	0	1	0	0	0	1	0	1	1	0	1	0	1	0	1	0	0	0	71	Very good	Enumerator 4
NC2025-0786	Valid Samples	2025-07-02	Nanchang South Railway Station	Male	25–34years	Master's degree or above	Visitors from Other Provinces in China	High-Speed Rail / Train	Group Tour	1	2–3 Days	Moderately Concerned	Yes	1	1	1	0	1	1	0	0	0	1	0	0	0	0	0	0	0	0	0	0	0	0	80	Excellent	Enumerator 1
NC2025-0787	Valid Samples	2025-08-08	Nanchang Changbei International Airport	Female	35–44years	High school or below	Visitors from Other Provinces in China	Private Car	Traveling with Partner	1	2–3 Days	Moderately Concerned	Yes	1	1	1	0	1	0	0	0	1	1	0	0	1	1	0	0	0	0	0	0	0	0	71	Very good	Enumerator 2
NC2025-0788	Valid Samples	2025-06-30	Nanchang West Railway Station	Male	≥60years	Bachelor's degree	Visitors from Other Provinces in China	High-Speed Rail / Train	Traveling with Family/Children	0	4–7 Days	Very Concerned	Yes	0	0	0	1	1	1	1	0	0	1	0	1	0	0	0	1	0	0	0	0	0	0	82	Excellent	Enumerator 3
NC2025-0789	Valid Samples	2025-08-29	Nanchang Railway Station	Male	25–34years	Master's degree or above	Visitors from Other Cities in Jiangxi Province	High-Speed Rail / Train	Traveling with Family/Children	0	2–3 Days	Neutral	No	1	1	0	0	1	0	0	0	0	1	1	0	1	0	0	1	0	0	0	0	0	1	64	Good	Enumerator 2
NC2025-0790	Valid Samples	2025-07-28	Nanchang Railway Station	Female	25–34years	High school or below	Local Visitors from Nanchang	Private Car	Traveling with Friends	0	2–3 Days	Very Concerned	No	0	1	0	1	0	0	0	0	0	0	0	1	0	0	0	0	0	0	0	0	0	1	68	Good	Enumerator 4
NC2025-0791	Valid Samples	2025-07-04	Nanchang East Railway Station	Female	25–34years	High school or below	Visitors from Hong Kong, Macao, Taiwan, and Overseas	High-Speed Rail / Train	Traveling with Friends	0	1 Day	Slightly Concerned	No	1	0	0	0	0	0	0	0	0	0	1	0	1	1	0	0	0	0	0	0	0	1	82	Excellent	Enumerator 4
NC2025-0792	Valid Samples	2025-07-08	Nanchang West Railway Station	Female	35–44years	Bachelor's degree	Local Visitors from Nanchang	Long-Distance Bus	Traveling with Family/Children	0	1 Day	Moderately Concerned	Yes	0	1	1	0	0	1	0	0	0	1	0	0	0	1	0	1	1	1	1	0	1	0	56	Acceptable	Enumerator 3
NC2025-0793	Valid Samples	2025-06-30	Nanchang Railway Station	Female	25–34years	Bachelor's degree	Local Visitors from Nanchang	High-Speed Rail / Train	Traveling Alone	0	Less than Half a Day	Not Concerned at All	No	1	0	1	0	0	1	0	0	0	1	0	0	0	1	1	0	0	0	0	0	0	1	77	Very good	Enumerator 3
NC2025-0794	Valid Samples	2025-07-08	Nanchang West Railway Station	Female	25–34years	Associate degree	Visitors from Other Cities in Jiangxi Province	High-Speed Rail / Train	Traveling with Family/Children	0	1 Day	Very Concerned	No	1	1	0	0	1	1	0	0	0	1	0	0	0	0	0	0	0	0	0	0	0	1	72	Very good	Enumerator 2
NC2025-0796	Valid Samples	2025-08-03	Nanchang West Railway Station	Female	25–34years	Bachelor's degree	Visitors from Other Cities in Jiangxi Province	High-Speed Rail / Train	Traveling with Friends	0	Less than Half a Day	Neutral	No	1	0	1	0	0	1	0	0	0	0	0	1	1	1	0	0	0	0	0	0	0	1	70	Very good	Enumerator 3
NC2025-0797	Valid Samples	2025-08-09	Nanchang Changbei International Airport	Male	25–34years	Master's degree or above	Visitors from Other Provinces in China	Airplane	Group Tour	0	2–3 Days	Very Concerned	Yes	1	0	0	1	1	0	0	0	0	1	0	0	1	0	0	0	0	0	0	0	0	0	68	Good	Enumerator 1
NC2025-0798	Valid Samples	2025-07-23	Nanchang Changbei International Airport	Female	35–44years	Master's degree or above	Visitors from Other Provinces in China	Airplane	Traveling with Family/Children	1	1 Day	Neutral	No	1	0	1	1	1	0	0	0	0	1	0	0	1	0	0	0	0	0	0	0	0	1	57	Acceptable	Enumerator 1
NC2025-0799	Valid Samples	2025-07-16	Nanchang Changbei International Airport	Male	45–59years	Bachelor's degree	Visitors from Other Provinces in China	Airplane	Traveling with Friends	0	2–3 Days	Moderately Concerned	No	0	0	1	1	1	0	0	0	0	1	1	1	0	0	0	1	0	0	0	0	0	1	60	Good	Enumerator 3
NC2025-0800	Valid Samples	2025-08-24	Nanchang Changbei International Airport	Male	18–24years	Associate degree	Visitors from Other Provinces in China	Airplane	Group Tour	1	4–7 Days	Moderately Concerned	No	1	1	1	0	1	0	0	0	0	1	0	0	1	0	0	1	0	0	0	0	0	1	84	Excellent	Enumerator 2
NC2025-0801	Valid Samples	2025-07-22	Nanchang East Railway Station	Female	18–24years	Master's degree or above	Visitors from Hong Kong, Macao, Taiwan, and Overseas	High-Speed Rail / Train	Traveling with Partner	0	1 Day	Very Concerned	Yes	1	0	0	0	0	1	0	1	1	1	1	0	1	1	0	0	0	0	1	0	0	0	58	Acceptable	Enumerator 1
NC2025-0802	Valid Samples	2025-08-04	Nanchang East Railway Station	Female	35–44years	Associate degree	Local Visitors from Nanchang	Private Car	Traveling with Partner	1	2–3 Days	Very Concerned	No	1	0	0	0	0	0	0	0	0	0	1	1	1	0	0	1	0	0	0	0	0	1	84	Excellent	Enumerator 2
NC2025-0803	Valid Samples	2025-07-03	Nanchang East Railway Station	Female	25–34years	Bachelor's degree	Visitors from Other Provinces in China	Private Car	Traveling with Friends	0	2–3 Days	Moderately Concerned	No	0	0	0	0	0	1	0	0	0	0	0	1	0	0	0	0	0	0	0	0	0	1	70	Very good	Enumerator 4
NC2025-0804	Valid Samples	2025-07-03	Nanchang West Railway Station	Female	≥60years	Associate degree	Local Visitors from Nanchang	Long-Distance Bus	Traveling with Partner	0	2–3 Days	Not Concerned at All	Yes	1	0	0	0	1	1	1	0	0	1	0	1	0	1	0	0	0	0	1	0	0	0	46	Marginal	Enumerator 4
NC2025-0805	Valid Samples	2025-08-12	Nanchang East Railway Station	Male	25–34years	Bachelor's degree	Visitors from Other Provinces in China	High-Speed Rail / Train	Traveling with Family/Children	0	Less than Half a Day	Neutral	Yes	1	0	1	1	0	0	0	0	0	1	0	1	1	0	0	0	1	0	0	0	0	0	55	Acceptable	Enumerator 4
NC2025-0806	Valid Samples	2025-08-24	Nanchang Railway Station	Male	18–24years	Bachelor's degree	Visitors from Other Provinces in China	Private Car	Group Tour	0	2–3 Days	Very Concerned	No	1	0	0	0	0	1	0	0	0	0	1	1	0	0	0	0	0	0	0	0	0	1	71	Very good	Enumerator 4
NC2025-0807	Valid Samples	2025-08-13	Nanchang Changbei International Airport	Female	35–44years	Bachelor's degree	Visitors from Other Provinces in China	Airplane	Traveling with Partner	0	2–3 Days	Neutral	Yes	0	0	1	1	0	0	0	0	0	0	0	0	0	1	0	0	0	0	0	0	0	0	54	Acceptable	Enumerator 2
NC2025-0808	Valid Samples	2025-08-24	Nanchang West Railway Station	Female	18–24years	Master's degree or above	Visitors from Other Cities in Jiangxi Province	High-Speed Rail / Train	Traveling with Family/Children	0	Less than Half a Day	Neutral	No	1	1	1	0	0	1	1	0	0	1	0	1	0	0	0	1	0	0	0	0	0	1	85	Excellent	Enumerator 1
NC2025-0809	Valid Samples	2025-07-26	Nanchang Changbei International Airport	Female	25–34years	Bachelor's degree	Local Visitors from Nanchang	Airplane	Traveling Alone	0	More than 7 Days	Neutral	Yes	1	1	1	0	0	0	0	0	0	1	0	0	0	0	0	0	0	0	0	0	0	0	78	Very good	Enumerator 1
NC2025-0810	Valid Samples	2025-08-10	Nanchang Changbei International Airport	Male	25–34years	Bachelor's degree	Visitors from Other Provinces in China	Airplane	Traveling with Friends	0	2–3 Days	Moderately Concerned	Yes	1	0	1	0	0	0	1	0	0	1	1	1	0	0	1	0	1	0	0	0	0	0	43	Marginal	Enumerator 2
NC2025-0811	Valid Samples	2025-07-16	Nanchang West Railway Station	Female	18–24years	Bachelor's degree	Visitors from Hong Kong, Macao, Taiwan, and Overseas	High-Speed Rail / Train	Traveling Alone	0	1 Day	Very Concerned	No	1	1	1	0	0	1	1	0	0	1	1	1	1	0	0	0	0	0	0	0	0	1	76	Very good	Enumerator 2
NC2025-0812	Valid Samples	2025-08-22	Nanchang Changbei International Airport	Female	18–24years	Associate degree	Local Visitors from Nanchang	Airplane	Group Tour	0	4–7 Days	Moderately Concerned	No	0	0	0	0	0	1	0	0	0	1	0	0	0	0	0	0	0	0	0	0	0	1	65	Good	Enumerator 2
NC2025-0813	Valid Samples	2025-07-18	Nanchang Railway Station	Female	18–24years	Master's degree or above	Local Visitors from Nanchang	Private Car	Traveling with Friends	0	1 Day	Neutral	No	0	0	1	1	0	1	0	0	0	0	0	0	1	1	0	1	0	0	0	0	0	1	66	Good	Enumerator 4
NC2025-0814	Valid Samples	2025-07-08	Nanchang Railway Station	Female	25–34years	Associate degree	Visitors from Other Provinces in China	High-Speed Rail / Train	Traveling with Friends	0	2–3 Days	Moderately Concerned	Yes	1	1	0	0	0	1	0	0	0	0	1	1	1	0	1	1	0	0	1	0	0	0	57	Acceptable	Enumerator 3
NC2025-0815	Valid Samples	2025-08-23	Nanchang East Railway Station	Female	45–59years	Master's degree or above	Visitors from Other Provinces in China	Private Car	Traveling with Friends	0	2–3 Days	Very Concerned	No	1	1	0	0	0	1	0	0	0	0	1	0	1	0	0	0	0	0	0	0	0	1	85	Excellent	Enumerator 2
NC2025-0816	Valid Samples	2025-07-20	Nanchang Changbei International Airport	Female	18–24years	Master's degree or above	Visitors from Other Cities in Jiangxi Province	Airplane	Group Tour	0	4–7 Days	Very Concerned	No	1	0	1	1	0	1	0	0	0	0	0	1	0	0	0	1	0	0	0	0	0	1	64	Good	Enumerator 2
NC2025-0817	Valid Samples	2025-08-17	Nanchang West Railway Station	Female	≥60years	Associate degree	Visitors from Other Cities in Jiangxi Province	Other	Traveling with Partner	0	Less than Half a Day	Neutral	Yes	0	0	0	0	0	0	1	0	0	1	0	0	1	1	0	0	0	0	0	0	0	0	58	Acceptable	Enumerator 3
NC2025-0818	Valid Samples	2025-08-16	Nanchang East Railway Station	Male	35–44years	Associate degree	Visitors from Other Cities in Jiangxi Province	Private Car	Traveling with Friends	0	1 Day	Neutral	No	0	1	0	1	0	0	1	1	0	0	0	0	1	0	0	0	0	0	0	0	0	1	73	Very good	Enumerator 4
NC2025-0819	Valid Samples	2025-08-15	Nanchang South Railway Station	Male	18–24years	Master's degree or above	Visitors from Other Provinces in China	High-Speed Rail / Train	Traveling Alone	0	2–3 Days	Neutral	No	0	0	0	0	0	1	0	1	1	0	0	1	0	0	1	1	0	0	0	0	0	1	92	Ideal	Enumerator 1
NC2025-0820	Valid Samples	2025-08-10	Nanchang West Railway Station	Female	≥60years	Bachelor's degree	Local Visitors from Nanchang	High-Speed Rail / Train	Traveling with Family/Children	0	2–3 Days	Moderately Concerned	Yes	0	0	0	0	0	1	0	0	0	0	0	0	0	0	0	0	0	0	1	0	0	0	64	Good	Enumerator 2
NC2025-0821	Valid Samples	2025-08-07	Nanchang Railway Station	Female	35–44years	Associate degree	Local Visitors from Nanchang	High-Speed Rail / Train	Traveling with Friends	0	4–7 Days	Slightly Concerned	No	1	0	1	1	0	1	0	0	0	0	0	1	0	0	0	1	0	0	0	0	0	1	88	Excellent	Enumerator 3
NC2025-0823	Valid Samples	2025-07-15	Nanchang Changbei International Airport	Female	18–24years	Bachelor's degree	Visitors from Hong Kong, Macao, Taiwan, and Overseas	Private Car	Traveling with Friends	0	1 Day	Moderately Concerned	Yes	1	1	0	0	1	1	0	0	0	1	0	1	1	1	0	0	0	0	0	0	0	0	66	Good	Enumerator 4
NC2025-0824	Valid Samples	2025-07-04	Nanchang South Railway Station	Female	45–59years	Associate degree	Visitors from Other Cities in Jiangxi Province	High-Speed Rail / Train	Traveling with Family/Children	0	2–3 Days	Neutral	Yes	1	0	1	0	1	0	0	0	0	1	1	0	1	0	0	0	1	0	0	0	0	0	70	Very good	Enumerator 4
NC2025-0825	Valid Samples	2025-08-04	Nanchang Changbei International Airport	Male	18–24years	High school or below	Visitors from Other Provinces in China	Airplane	Traveling with Partner	0	More than 7 Days	Moderately Concerned	No	0	1	1	1	0	0	0	0	0	1	1	0	0	0	0	0	0	0	0	0	0	1	67	Good	Enumerator 2
NC2025-0826	Valid Samples	2025-07-09	Nanchang Railway Station	Female	18–24years	Bachelor's degree	Visitors from Other Provinces in China	High-Speed Rail / Train	Traveling with Partner	0	4–7 Days	Very Concerned	Yes	0	0	1	0	1	1	1	0	0	0	0	1	0	1	0	0	0	1	0	0	0	0	57	Acceptable	Enumerator 1
NC2025-0827	Valid Samples	2025-08-14	Nanchang Railway Station	Female	35–44years	Bachelor's degree	Visitors from Other Cities in Jiangxi Province	High-Speed Rail / Train	Traveling with Partner	2	1 Day	Neutral	Yes	0	0	1	0	0	0	0	0	0	0	0	1	0	0	0	0	1	0	1	0	0	0	67	Good	Enumerator 1
NC2025-0828	Valid Samples	2025-07-04	Nanchang Railway Station	Female	25–34years	Master's degree or above	Visitors from Other Cities in Jiangxi Province	High-Speed Rail / Train	Group Tour	0	4–7 Days	Very Concerned	No	1	1	0	1	0	0	0	0	0	1	0	1	1	0	0	0	0	0	0	0	0	1	62	Good	Enumerator 3
NC2025-0829	Valid Samples	2025-08-17	Nanchang West Railway Station	Female	25–34years	Bachelor's degree	Visitors from Other Provinces in China	High-Speed Rail / Train	Traveling with Friends	0	1 Day	Moderately Concerned	Yes	1	0	0	0	1	1	0	0	0	0	0	0	0	1	0	0	0	0	0	0	0	0	42	Marginal	Enumerator 2
NC2025-0830	Valid Samples	2025-07-06	Nanchang Changbei International Airport	Male	25–34years	Bachelor's degree	Visitors from Other Provinces in China	Private Car	Traveling with Friends	0	2–3 Days	Moderately Concerned	Yes	1	1	0	1	0	0	0	0	0	1	0	1	1	0	1	0	0	0	0	0	1	0	80	Excellent	Enumerator 4
NC2025-0831	Valid Samples	2025-08-05	Nanchang Changbei International Airport	Male	25–34years	Associate degree	Visitors from Other Provinces in China	Airplane	Traveling with Family/Children	0	2–3 Days	Neutral	Yes	0	1	0	0	0	0	1	0	0	1	0	0	1	0	0	0	0	0	0	0	0	0	67	Good	Enumerator 2
NC2025-0832	Valid Samples	2025-08-15	Nanchang East Railway Station	Female	18–24years	Master's degree or above	Visitors from Other Provinces in China	High-Speed Rail / Train	Traveling with Family/Children	0	2–3 Days	Very Concerned	No	0	0	0	0	1	0	0	0	0	0	0	0	1	0	1	1	0	0	0	0	0	1	76	Very good	Enumerator 1
NC2025-0834	Valid Samples	2025-07-13	Nanchang East Railway Station	Male	25–34years	Bachelor's degree	Visitors from Other Cities in Jiangxi Province	High-Speed Rail / Train	Traveling with Friends	0	2–3 Days	Moderately Concerned	Yes	1	0	1	0	0	1	0	0	0	1	0	1	0	0	0	1	0	1	0	0	0	0	66	Good	Enumerator 1
NC2025-0835	Valid Samples	2025-07-05	Nanchang South Railway Station	Female	35–44years	Bachelor's degree	Visitors from Other Provinces in China	High-Speed Rail / Train	Traveling with Family/Children	0	2–3 Days	Slightly Concerned	No	1	0	0	1	1	1	0	0	0	1	0	1	1	0	0	0	0	0	0	0	0	1	65	Good	Enumerator 3
NC2025-0836	Valid Samples	2025-07-16	Nanchang Changbei International Airport	Female	18–24years	Associate degree	Visitors from Other Provinces in China	Airplane	Traveling with Partner	0	1 Day	Very Concerned	Yes	1	1	0	0	0	1	0	0	0	1	0	1	1	0	0	0	0	0	0	0	0	0	76	Very good	Enumerator 4
NC2025-0837	Valid Samples	2025-07-12	Nanchang Changbei International Airport	Female	18–24years	Bachelor's degree	Visitors from Other Cities in Jiangxi Province	Airplane	Traveling with Family/Children	2	4–7 Days	Moderately Concerned	Yes	1	0	0	1	0	0	0	0	0	1	0	0	1	1	0	0	0	0	0	0	0	0	46	Marginal	Enumerator 4
NC2025-0838	Valid Samples	2025-07-05	Nanchang Changbei International Airport	Female	18–24years	High school or below	Visitors from Other Provinces in China	Airplane	Group Tour	1	2–3 Days	Moderately Concerned	No	1	0	1	0	1	1	0	0	0	1	0	1	1	0	0	0	0	0	0	0	0	1	95	Ideal	Enumerator 4
NC2025-0839	Valid Samples	2025-08-06	Nanchang West Railway Station	Female	35–44years	Bachelor's degree	Visitors from Other Cities in Jiangxi Province	High-Speed Rail / Train	Traveling with Friends	1	2–3 Days	Very Concerned	Yes	0	1	0	1	0	0	0	1	0	1	0	0	0	0	0	0	1	1	0	0	0	0	56	Acceptable	Enumerator 2
NC2025-0840	Valid Samples	2025-08-12	Nanchang Changbei International Airport	Female	25–34years	High school or below	Visitors from Other Cities in Jiangxi Province	Airplane	Traveling with Friends	0	4–7 Days	Moderately Concerned	Yes	1	1	0	0	0	0	0	0	0	1	0	0	0	0	0	0	0	0	0	0	0	0	77	Very good	Enumerator 3
NC2025-0841	Valid Samples	2025-08-20	Nanchang Changbei International Airport	Female	35–44years	Bachelor's degree	Visitors from Other Provinces in China	Airplane	Traveling with Friends	0	Less than Half a Day	Moderately Concerned	Yes	0	1	0	0	0	0	0	0	0	0	1	0	1	0	1	0	0	1	0	0	0	0	77	Very good	Enumerator 4
NC2025-0842	Valid Samples	2025-08-30	Nanchang South Railway Station	Female	18–24years	Master's degree or above	Visitors from Other Provinces in China	High-Speed Rail / Train	Traveling with Friends	1	2–3 Days	Very Concerned	Yes	0	0	1	1	0	1	1	0	1	1	0	1	1	1	0	0	0	0	0	0	0	0	56	Acceptable	Enumerator 3
NC2025-0843	Valid Samples	2025-07-30	Nanchang Changbei International Airport	Male	25–34years	Associate degree	Visitors from Other Provinces in China	Airplane	Traveling with Partner	0	1 Day	Neutral	Yes	1	1	0	0	0	1	0	0	0	0	0	0	1	1	0	0	0	1	0	0	0	0	67	Good	Enumerator 1
NC2025-0844	Valid Samples	2025-08-27	Nanchang Changbei International Airport	Female	45–59years	Bachelor's degree	Visitors from Other Provinces in China	Airplane	Traveling Alone	0	Less than Half a Day	Very Concerned	No	1	0	0	0	0	1	0	0	0	0	0	1	0	0	0	0	0	0	0	0	0	1	50	Acceptable	Enumerator 4
NC2025-0845	Valid Samples	2025-08-09	Nanchang Railway Station	Male	25–34years	Master's degree or above	Local Visitors from Nanchang	Local Public Transportation	Traveling with Friends	2	2–3 Days	Moderately Concerned	Yes	0	0	1	1	0	1	0	1	0	0	0	1	0	0	0	0	1	0	0	0	0	0	93	Ideal	Enumerator 4
NC2025-0846	Valid Samples	2025-08-27	Nanchang Changbei International Airport	Male	35–44years	Associate degree	Visitors from Other Cities in Jiangxi Province	Airplane	Group Tour	0	1 Day	Slightly Concerned	No	1	0	1	0	1	1	0	0	0	0	1	1	1	0	0	0	0	0	0	0	0	1	70	Very good	Enumerator 3
NC2025-0847	Valid Samples	2025-07-10	Nanchang West Railway Station	Female	45–59years	Master's degree or above	Visitors from Other Cities in Jiangxi Province	Long-Distance Bus	Traveling with Friends	0	1 Day	Moderately Concerned	Yes	1	0	1	0	1	1	0	0	0	1	0	0	1	0	0	0	1	0	0	0	0	0	90	Ideal	Enumerator 4
NC2025-0848	Valid Samples	2025-08-17	Nanchang East Railway Station	Female	25–34years	Associate degree	Visitors from Other Provinces in China	High-Speed Rail / Train	Traveling with Friends	0	4–7 Days	Not Concerned at All	No	1	0	1	1	0	1	0	0	0	0	0	0	0	0	0	0	0	0	0	0	0	1	77	Very good	Enumerator 4
NC2025-0849	Valid Samples	2025-07-07	Nanchang East Railway Station	Female	18–24years	Bachelor's degree	Visitors from Other Provinces in China	High-Speed Rail / Train	Traveling with Friends	0	1 Day	Neutral	Yes	1	1	0	0	1	1	0	0	0	0	0	1	1	0	0	0	1	0	0	0	0	0	80	Excellent	Enumerator 2
NC2025-0850	Valid Samples	2025-08-28	Nanchang Railway Station	Female	18–24years	Associate degree	Visitors from Other Cities in Jiangxi Province	Private Car	Traveling Alone	0	1 Day	Very Concerned	Yes	1	1	1	0	0	0	0	0	0	1	0	0	0	0	0	0	0	1	0	0	0	0	83	Excellent	Enumerator 2
NC2025-0851	Valid Samples	2025-08-22	Nanchang Changbei International Airport	Female	25–34years	Bachelor's degree	Visitors from Other Provinces in China	Private Car	Traveling with Friends	2	1 Day	Very Concerned	Yes	0	0	0	0	0	1	0	0	0	1	1	1	1	0	0	0	1	1	1	0	0	0	67	Good	Enumerator 3
NC2025-0852	Valid Samples	2025-07-12	Nanchang East Railway Station	Female	25–34years	Master's degree or above	Visitors from Other Provinces in China	High-Speed Rail / Train	Traveling with Friends	0	1 Day	Moderately Concerned	No	0	0	1	1	0	0	0	0	0	0	0	0	1	0	0	0	0	0	0	0	0	1	53	Acceptable	Enumerator 4
NC2025-0853	Valid Samples	2025-07-06	Nanchang East Railway Station	Male	25–34years	Associate degree	Visitors from Other Cities in Jiangxi Province	High-Speed Rail / Train	Traveling with Partner	1	2–3 Days	Moderately Concerned	No	1	1	1	0	1	1	0	0	0	0	0	0	1	0	0	0	0	0	0	0	0	1	61	Good	Enumerator 2
NC2025-0854	Valid Samples	2025-07-29	Nanchang South Railway Station	Male	18–24years	Bachelor's degree	Local Visitors from Nanchang	High-Speed Rail / Train	Group Tour	0	2–3 Days	Slightly Concerned	No	1	0	1	1	0	0	0	1	0	1	1	0	0	0	1	0	0	0	0	0	0	1	53	Acceptable	Enumerator 4
NC2025-0855	Valid Samples	2025-07-26	Nanchang Changbei International Airport	Female	35–44years	Master's degree or above	Visitors from Other Cities in Jiangxi Province	Airplane	Traveling with Partner	3	1 Day	Very Concerned	Yes	1	1	0	0	1	1	0	0	0	0	1	0	0	0	1	0	0	0	0	0	0	0	58	Acceptable	Enumerator 1
NC2025-0856	Valid Samples	2025-08-06	Nanchang Changbei International Airport	Male	25–34years	Associate degree	Visitors from Other Cities in Jiangxi Province	Airplane	Group Tour	0	1 Day	Very Concerned	No	1	0	0	0	0	0	0	0	0	1	0	1	0	0	0	0	0	0	0	0	0	1	68	Good	Enumerator 1
NC2025-0857	Valid Samples	2025-07-19	Nanchang East Railway Station	Male	18–24years	Master's degree or above	Visitors from Other Provinces in China	High-Speed Rail / Train	Traveling with Family/Children	0	1 Day	Very Concerned	No	0	1	1	0	1	0	0	0	0	1	1	1	0	0	0	0	0	0	0	0	0	1	62	Good	Enumerator 1
NC2025-0858	Valid Samples	2025-08-09	Nanchang Railway Station	Male	18–24years	Bachelor's degree	Visitors from Hong Kong, Macao, Taiwan, and Overseas	Private Car	Traveling with Family/Children	0	2–3 Days	Very Concerned	No	1	1	1	0	1	0	0	0	0	1	1	1	1	0	0	0	0	0	0	0	0	1	83	Excellent	Enumerator 2
NC2025-0859	Valid Samples	2025-07-20	Nanchang East Railway Station	Female	18–24years	Bachelor's degree	Visitors from Other Provinces in China	High-Speed Rail / Train	Traveling with Friends	0	1 Day	Neutral	Yes	1	1	0	0	0	1	0	0	0	1	1	1	0	0	0	0	0	0	0	1	0	0	60	Good	Enumerator 1
NC2025-0860	Valid Samples	2025-07-11	Nanchang East Railway Station	Male	35–44years	Associate degree	Visitors from Other Provinces in China	Private Car	Traveling with Family/Children	0	4–7 Days	Moderately Concerned	No	1	1	0	1	0	0	1	0	0	0	1	0	0	0	0	1	0	0	0	0	0	1	57	Acceptable	Enumerator 4
NC2025-0861	Valid Samples	2025-08-17	Nanchang Changbei International Airport	Female	35–44years	Associate degree	Visitors from Other Cities in Jiangxi Province	Airplane	Traveling with Friends	1	4–7 Days	Moderately Concerned	No	0	0	0	0	0	0	0	0	0	1	1	1	0	1	1	0	0	0	0	0	0	1	73	Very good	Enumerator 2
NC2025-0862	Valid Samples	2025-08-04	Nanchang Changbei International Airport	Female	45–59years	High school or below	Visitors from Other Provinces in China	Airplane	Group Tour	0	1 Day	Very Concerned	Yes	1	0	1	0	1	0	0	0	0	1	1	0	0	0	0	0	0	0	0	0	0	0	68	Good	Enumerator 3
NC2025-0863	Valid Samples	2025-08-02	Nanchang Railway Station	Male	25–34years	Bachelor's degree	Local Visitors from Nanchang	High-Speed Rail / Train	Traveling with Partner	2	2–3 Days	Moderately Concerned	No	1	0	0	0	0	0	0	0	0	1	0	1	1	1	0	1	0	0	0	0	0	1	77	Very good	Enumerator 3
NC2025-0864	Valid Samples	2025-07-04	Nanchang Railway Station	Male	25–34years	Associate degree	Visitors from Other Cities in Jiangxi Province	High-Speed Rail / Train	Traveling with Friends	1	4–7 Days	Neutral	Yes	0	1	1	1	1	1	1	0	0	0	0	0	1	0	1	0	1	0	0	0	0	0	49	Marginal	Enumerator 2
NC2025-0865	Valid Samples	2025-08-02	Nanchang West Railway Station	Male	35–44years	High school or below	Local Visitors from Nanchang	High-Speed Rail / Train	Group Tour	0	2–3 Days	Moderately Concerned	Yes	0	0	1	0	0	0	0	0	0	1	1	0	0	0	0	1	0	1	0	0	0	0	49	Marginal	Enumerator 2
NC2025-0867	Valid Samples	2025-08-02	Nanchang Changbei International Airport	Female	25–34years	Bachelor's degree	Visitors from Other Provinces in China	Private Car	Traveling with Partner	0	2–3 Days	Very Concerned	Yes	0	0	0	1	0	0	0	0	0	1	0	0	1	0	0	0	0	0	1	1	0	0	57	Acceptable	Enumerator 2
NC2025-0868	Valid Samples	2025-07-25	Nanchang West Railway Station	Male	25–34years	Bachelor's degree	Visitors from Other Cities in Jiangxi Province	Local Public Transportation	Traveling Alone	1	1 Day	Moderately Concerned	Yes	1	1	0	0	0	0	0	0	0	0	0	1	0	0	0	0	0	0	0	0	0	0	82	Excellent	Enumerator 1
NC2025-0869	Valid Samples	2025-08-21	Nanchang West Railway Station	Female	45–59years	Associate degree	Visitors from Other Cities in Jiangxi Province	High-Speed Rail / Train	Traveling with Family/Children	0	1 Day	Neutral	No	1	0	0	0	1	0	0	0	0	1	1	0	1	0	0	0	0	0	0	0	0	1	77	Very good	Enumerator 1
NC2025-0870	Valid Samples	2025-06-30	Nanchang Railway Station	Female	25–34years	Bachelor's degree	Visitors from Hong Kong, Macao, Taiwan, and Overseas	High-Speed Rail / Train	Traveling with Family/Children	0	1 Day	Moderately Concerned	No	0	0	0	0	0	1	0	0	0	0	1	1	0	0	0	0	0	0	0	0	0	1	64	Good	Enumerator 1
NC2025-0871	Valid Samples	2025-08-10	Nanchang East Railway Station	Male	18–24years	Master's degree or above	Visitors from Other Provinces in China	High-Speed Rail / Train	Traveling with Family/Children	0	4–7 Days	Neutral	No	0	0	0	0	0	0	1	0	0	1	0	0	1	0	0	0	0	0	0	0	0	1	50	Acceptable	Enumerator 4
NC2025-0872	Valid Samples	2025-08-18	Nanchang East Railway Station	Female	25–34years	Bachelor's degree	Local Visitors from Nanchang	Private Car	Traveling with Friends	0	1 Day	Neutral	No	1	1	0	0	1	1	0	0	0	0	0	0	0	0	0	0	0	0	0	0	0	1	54	Acceptable	Enumerator 4
NC2025-0873	Valid Samples	2025-08-15	Nanchang Railway Station	Male	18–24years	Master's degree or above	Visitors from Other Cities in Jiangxi Province	High-Speed Rail / Train	Traveling Alone	0	1 Day	Neutral	Yes	1	0	0	1	0	0	0	0	0	1	0	0	1	0	0	0	0	0	0	0	0	0	55	Acceptable	Enumerator 2
NC2025-0874	Valid Samples	2025-08-13	Nanchang East Railway Station	Male	25–34years	Bachelor's degree	Local Visitors from Nanchang	High-Speed Rail / Train	Traveling with Friends	0	4–7 Days	Neutral	Yes	0	1	0	0	1	1	0	0	0	1	1	1	0	0	0	0	1	0	0	0	0	0	50	Acceptable	Enumerator 3
NC2025-0875	Valid Samples	2025-08-18	Nanchang Railway Station	Female	35–44years	Bachelor's degree	Local Visitors from Nanchang	High-Speed Rail / Train	Traveling with Family/Children	1	2–3 Days	Very Concerned	Yes	1	0	0	0	1	0	0	0	0	0	0	0	0	0	0	0	1	1	0	0	1	0	63	Good	Enumerator 2
NC2025-0876	Valid Samples	2025-07-07	Nanchang West Railway Station	Male	45–59years	Bachelor's degree	Visitors from Other Cities in Jiangxi Province	High-Speed Rail / Train	Traveling with Friends	0	1 Day	Moderately Concerned	No	0	0	1	1	1	1	0	0	0	1	0	1	0	1	0	1	0	0	0	0	0	1	78	Very good	Enumerator 4
NC2025-0877	Valid Samples	2025-07-03	Nanchang East Railway Station	Male	25–34years	Master's degree or above	Visitors from Other Provinces in China	Private Car	Traveling with Family/Children	0	2–3 Days	Neutral	No	0	1	1	1	1	0	0	0	0	1	0	0	0	0	0	0	0	0	0	0	0	1	56	Acceptable	Enumerator 1
NC2025-0878	Valid Samples	2025-07-29	Nanchang West Railway Station	Male	18–24years	Master's degree or above	Local Visitors from Nanchang	Long-Distance Bus	Traveling with Friends	0	Less than Half a Day	Moderately Concerned	Yes	1	0	1	0	0	1	0	0	0	0	0	1	1	0	1	0	0	0	0	0	0	0	47	Marginal	Enumerator 1
NC2025-0879	Valid Samples	2025-08-17	Nanchang East Railway Station	Male	25–34years	Master's degree or above	Visitors from Other Provinces in China	High-Speed Rail / Train	Traveling with Friends	0	1 Day	Neutral	No	1	1	1	1	1	0	0	0	0	1	0	1	0	0	0	0	0	0	0	0	0	1	63	Good	Enumerator 1
NC2025-0880	Valid Samples	2025-08-16	Nanchang Railway Station	Male	35–44years	Bachelor's degree	Visitors from Other Cities in Jiangxi Province	High-Speed Rail / Train	Traveling Alone	0	1 Day	Moderately Concerned	Yes	0	0	0	0	0	0	0	0	0	0	1	0	0	1	0	0	0	0	1	0	0	0	55	Acceptable	Enumerator 4
NC2025-0881	Valid Samples	2025-07-08	Nanchang Changbei International Airport	Male	35–44years	High school or below	Local Visitors from Nanchang	Airplane	Traveling with Family/Children	0	Less than Half a Day	Slightly Concerned	Yes	1	1	1	1	0	1	0	0	0	1	0	0	1	0	0	0	0	0	0	0	0	0	48	Marginal	Enumerator 1
NC2025-0882	Valid Samples	2025-08-06	Nanchang West Railway Station	Male	35–44years	Bachelor's degree	Local Visitors from Nanchang	High-Speed Rail / Train	Traveling with Partner	0	2–3 Days	Moderately Concerned	No	1	1	0	1	0	0	1	0	0	1	1	0	1	0	1	1	0	0	0	0	0	1	68	Good	Enumerator 1
NC2025-0883	Valid Samples	2025-08-24	Nanchang South Railway Station	Male	18–24years	High school or below	Visitors from Other Provinces in China	High-Speed Rail / Train	Traveling Alone	0	1 Day	Very Concerned	No	0	0	1	1	0	1	0	1	0	1	1	0	1	0	1	0	0	0	0	0	0	1	77	Very good	Enumerator 2
NC2025-0884	Valid Samples	2025-08-29	Nanchang Railway Station	Male	45–59years	Bachelor's degree	Visitors from Other Provinces in China	High-Speed Rail / Train	Traveling with Family/Children	0	1 Day	Neutral	No	0	0	0	1	0	1	0	0	0	1	1	0	0	0	0	1	0	0	0	0	0	1	46	Marginal	Enumerator 1
NC2025-0885	Valid Samples	2025-08-25	Nanchang East Railway Station	Male	18–24years	Bachelor's degree	Visitors from Other Provinces in China	High-Speed Rail / Train	Traveling with Family/Children	0	2–3 Days	Neutral	Yes	1	1	1	1	0	0	1	1	0	1	0	1	1	0	0	0	0	0	0	0	0	0	73	Very good	Enumerator 3
NC2025-0886	Valid Samples	2025-08-24	Nanchang West Railway Station	Female	18–24years	Associate degree	Visitors from Other Provinces in China	Long-Distance Bus	Traveling Alone	0	2–3 Days	Moderately Concerned	Yes	1	1	0	0	0	0	0	0	0	0	0	0	0	0	1	0	0	0	0	0	0	0	75	Very good	Enumerator 4
NC2025-0887	Valid Samples	2025-07-21	Nanchang Railway Station	Female	25–34years	Bachelor's degree	Visitors from Other Provinces in China	High-Speed Rail / Train	Traveling with Friends	0	1 Day	Neutral	Yes	1	0	1	1	1	0	0	0	0	0	0	1	0	1	1	0	0	0	1	0	0	0	54	Acceptable	Enumerator 1
NC2025-0888	Valid Samples	2025-08-03	Nanchang West Railway Station	Female	25–34years	Master's degree or above	Visitors from Other Provinces in China	High-Speed Rail / Train	Group Tour	0	2–3 Days	Moderately Concerned	No	1	0	0	1	0	0	1	0	0	0	1	1	1	0	0	0	0	0	0	0	0	1	76	Very good	Enumerator 2
NC2025-0889	Valid Samples	2025-08-07	Nanchang West Railway Station	Female	35–44years	High school or below	Visitors from Other Cities in Jiangxi Province	High-Speed Rail / Train	Traveling Alone	1	2–3 Days	Slightly Concerned	Yes	0	0	1	1	0	0	0	0	0	1	1	0	1	0	1	0	1	0	0	1	0	0	55	Acceptable	Enumerator 3
NC2025-0890	Valid Samples	2025-07-26	Nanchang Changbei International Airport	Female	45–59years	Associate degree	Visitors from Other Cities in Jiangxi Province	Airplane	Traveling with Friends	1	1 Day	Neutral	No	1	0	1	0	0	1	1	0	0	0	0	1	0	1	0	0	0	0	0	0	0	1	78	Very good	Enumerator 4
NC2025-0891	Valid Samples	2025-08-28	Nanchang South Railway Station	Female	18–24years	Associate degree	Visitors from Other Provinces in China	High-Speed Rail / Train	Traveling Alone	0	2–3 Days	Neutral	Yes	1	0	1	0	1	0	0	0	0	1	0	0	1	0	1	0	1	0	0	0	0	0	61	Good	Enumerator 4
NC2025-0892	Valid Samples	2025-07-28	Nanchang Changbei International Airport	Male	25–34years	Bachelor's degree	Visitors from Other Provinces in China	Airplane	Traveling with Family/Children	0	Less than Half a Day	Moderately Concerned	No	0	0	1	1	1	0	0	0	0	0	0	0	1	0	0	0	0	0	0	0	0	1	61	Good	Enumerator 3
NC2025-0893	Valid Samples	2025-08-12	Nanchang South Railway Station	Male	18–24years	Bachelor's degree	Visitors from Other Cities in Jiangxi Province	High-Speed Rail / Train	Traveling with Family/Children	0	4–7 Days	Very Concerned	No	1	0	0	1	0	1	0	1	0	1	0	1	0	0	0	0	0	0	0	0	0	1	55	Acceptable	Enumerator 4
NC2025-0894	Valid Samples	2025-08-20	Nanchang West Railway Station	Male	45–59years	Bachelor's degree	Visitors from Other Cities in Jiangxi Province	Private Car	Traveling Alone	0	2–3 Days	Neutral	No	1	0	0	0	1	0	0	0	0	0	0	1	0	1	0	1	0	0	0	0	0	1	84	Excellent	Enumerator 3
NC2025-0895	Valid Samples	2025-08-29	Nanchang Railway Station	Male	35–44years	Bachelor's degree	Visitors from Other Provinces in China	Local Public Transportation	Traveling with Friends	0	2–3 Days	Slightly Concerned	Yes	0	1	0	1	0	0	0	0	0	0	1	1	1	0	0	0	0	0	0	0	0	0	73	Very good	Enumerator 2
NC2025-0896	Valid Samples	2025-07-29	Nanchang East Railway Station	Female	25–34years	Bachelor's degree	Visitors from Other Cities in Jiangxi Province	Private Car	Traveling with Family/Children	0	2–3 Days	Moderately Concerned	Yes	0	0	0	0	1	1	1	0	0	1	0	1	0	0	0	0	0	0	0	0	0	0	67	Good	Enumerator 2
NC2025-0897	Valid Samples	2025-08-19	Nanchang South Railway Station	Female	18–24years	Associate degree	Visitors from Other Provinces in China	High-Speed Rail / Train	Traveling with Partner	0	2–3 Days	Neutral	Yes	1	1	1	0	1	1	1	0	0	0	0	1	1	0	0	0	0	0	0	1	0	0	50	Acceptable	Enumerator 3
NC2025-0898	Valid Samples	2025-07-24	Nanchang Railway Station	Female	18–24years	Bachelor's degree	Local Visitors from Nanchang	High-Speed Rail / Train	Traveling Alone	0	2–3 Days	Moderately Concerned	Yes	1	0	1	0	1	0	0	0	0	1	1	0	1	0	0	0	0	0	0	0	0	0	51	Acceptable	Enumerator 3
NC2025-0899	Valid Samples	2025-07-15	Nanchang Railway Station	Female	25–34years	Associate degree	Visitors from Other Cities in Jiangxi Province	High-Speed Rail / Train	Traveling with Partner	1	1 Day	Very Concerned	Yes	0	0	0	0	0	1	0	0	0	1	0	0	0	0	1	1	1	0	0	0	0	0	44	Marginal	Enumerator 4
NC2025-0900	Valid Samples	2025-07-05	Nanchang Railway Station	Male	≥60years	High school or below	Visitors from Other Provinces in China	Long-Distance Bus	Group Tour	0	1 Day	Neutral	No	0	0	0	0	1	0	0	0	0	0	0	0	0	0	0	0	0	0	0	0	0	1	81	Excellent	Enumerator 1
NC2025-0901	Valid Samples	2025-07-29	Nanchang West Railway Station	Female	35–44years	Bachelor's degree	Visitors from Other Cities in Jiangxi Province	High-Speed Rail / Train	Traveling with Friends	0	2–3 Days	Neutral	Yes	1	0	1	1	0	0	0	0	0	1	1	1	0	1	0	0	1	0	0	0	0	0	67	Good	Enumerator 4
NC2025-0902	Valid Samples	2025-07-11	Nanchang West Railway Station	Male	18–24years	High school or below	Visitors from Other Cities in Jiangxi Province	High-Speed Rail / Train	Traveling with Friends	2	4–7 Days	Neutral	No	0	1	1	0	0	1	0	0	0	0	1	1	0	0	0	0	0	0	0	0	0	1	73	Very good	Enumerator 3
NC2025-0903	Valid Samples	2025-08-06	Nanchang Changbei International Airport	Male	25–34years	High school or below	Visitors from Other Cities in Jiangxi Province	Airplane	Group Tour	4	2–3 Days	Neutral	No	0	0	0	0	0	1	0	0	0	0	1	0	1	0	0	0	0	0	0	0	0	1	61	Good	Enumerator 1
NC2025-0904	Valid Samples	2025-07-23	Nanchang East Railway Station	Female	18–24years	Bachelor's degree	Visitors from Other Cities in Jiangxi Province	Private Car	Traveling with Friends	1	Less than Half a Day	Neutral	No	0	0	1	0	1	1	0	0	0	0	0	1	1	0	0	0	0	0	0	0	0	1	79	Very good	Enumerator 4
NC2025-0905	Valid Samples	2025-08-15	Nanchang Railway Station	Female	≥60years	Bachelor's degree	Visitors from Other Provinces in China	High-Speed Rail / Train	Traveling Alone	0	4–7 Days	Very Concerned	Yes	1	0	1	1	0	0	1	0	0	1	0	0	1	0	0	0	1	0	0	0	0	0	77	Very good	Enumerator 1
NC2025-0906	Valid Samples	2025-07-01	Nanchang West Railway Station	Female	35–44years	Bachelor's degree	Visitors from Other Cities in Jiangxi Province	High-Speed Rail / Train	Traveling with Family/Children	0	1 Day	Neutral	Yes	0	0	0	1	1	1	0	0	0	0	0	0	0	0	0	1	0	0	0	0	0	0	62	Good	Enumerator 2
NC2025-0907	Valid Samples	2025-08-16	Nanchang West Railway Station	Male	45–59years	High school or below	Visitors from Other Cities in Jiangxi Province	High-Speed Rail / Train	Traveling with Friends	0	1 Day	Neutral	No	0	0	0	0	1	0	0	0	0	1	0	1	0	0	0	0	0	0	0	0	0	1	76	Very good	Enumerator 2
NC2025-0909	Valid Samples	2025-08-23	Nanchang West Railway Station	Female	18–24years	Bachelor's degree	Visitors from Other Cities in Jiangxi Province	High-Speed Rail / Train	Traveling Alone	0	Less than Half a Day	Very Concerned	No	0	0	0	0	0	0	0	0	0	1	1	0	0	0	0	1	0	0	0	0	0	1	40	Marginal	Enumerator 3
NC2025-0910	Valid Samples	2025-07-22	Nanchang West Railway Station	Female	18–24years	Bachelor's degree	Visitors from Other Cities in Jiangxi Province	Private Car	Traveling with Family/Children	0	2–3 Days	Moderately Concerned	Yes	1	1	1	0	0	1	0	0	0	0	1	0	0	0	0	1	0	0	0	1	0	0	50	Acceptable	Enumerator 3
NC2025-0911	Valid Samples	2025-08-13	Nanchang West Railway Station	Female	25–34years	Associate degree	Visitors from Other Provinces in China	High-Speed Rail / Train	Traveling with Friends	2	2–3 Days	Slightly Concerned	No	1	0	0	1	0	0	0	0	0	0	0	1	0	1	0	0	0	0	0	0	0	1	73	Very good	Enumerator 2
NC2025-0912	Valid Samples	2025-08-20	Nanchang South Railway Station	Female	18–24years	Bachelor's degree	Visitors from Other Cities in Jiangxi Province	High-Speed Rail / Train	Traveling with Partner	0	1 Day	Very Concerned	No	1	0	0	0	1	0	0	0	0	1	0	1	1	0	0	0	0	0	0	0	0	1	63	Good	Enumerator 1
NC2025-0913	Valid Samples	2025-07-16	Nanchang South Railway Station	Female	25–34years	High school or below	Visitors from Other Cities in Jiangxi Province	High-Speed Rail / Train	Traveling Alone	2	Less than Half a Day	Moderately Concerned	No	0	1	0	0	0	1	0	0	0	1	0	1	1	0	0	0	0	0	0	0	0	1	90	Ideal	Enumerator 3
NC2025-0914	Valid Samples	2025-08-02	Nanchang Railway Station	Female	25–34years	Associate degree	Visitors from Other Provinces in China	Private Car	Traveling with Friends	0	2–3 Days	Moderately Concerned	Yes	0	1	0	0	0	0	1	0	0	0	0	0	1	0	0	1	1	1	0	0	0	0	76	Very good	Enumerator 4
NC2025-0915	Valid Samples	2025-07-19	Nanchang Changbei International Airport	Male	25–34years	Bachelor's degree	Visitors from Other Provinces in China	Airplane	Traveling with Friends	1	1 Day	Moderately Concerned	No	1	1	1	1	0	1	0	0	0	0	0	1	1	0	0	0	0	0	0	0	0	1	71	Very good	Enumerator 3
NC2025-0916	Valid Samples	2025-08-30	Nanchang Changbei International Airport	Male	25–34years	Bachelor's degree	Visitors from Other Cities in Jiangxi Province	Airplane	Traveling Alone	1	2–3 Days	Very Concerned	Yes	0	1	1	1	0	0	0	0	0	0	1	1	0	0	0	0	0	0	0	0	0	0	61	Good	Enumerator 3
NC2025-0917	Valid Samples	2025-07-17	Nanchang Changbei International Airport	Female	18–24years	Master's degree or above	Visitors from Other Provinces in China	Airplane	Traveling with Friends	0	2–3 Days	Moderately Concerned	No	0	0	1	0	0	0	0	0	0	1	0	0	1	1	0	0	0	0	0	0	0	1	76	Very good	Enumerator 3
NC2025-0918	Valid Samples	2025-08-28	Nanchang South Railway Station	Female	18–24years	Associate degree	Local Visitors from Nanchang	High-Speed Rail / Train	Traveling with Family/Children	0	2–3 Days	Neutral	No	1	1	1	0	0	0	0	0	0	0	0	1	0	0	1	0	0	0	0	0	0	1	54	Acceptable	Enumerator 2
NC2025-0919	Valid Samples	2025-07-16	Nanchang Railway Station	Male	45–59years	Bachelor's degree	Visitors from Other Cities in Jiangxi Province	Other	Group Tour	0	More than 7 Days	Very Concerned	No	1	0	1	0	0	1	0	0	0	0	1	1	0	0	0	0	0	0	0	0	0	1	67	Good	Enumerator 4
NC2025-0920	Valid Samples	2025-08-20	Nanchang East Railway Station	Female	25–34years	Master's degree or above	Visitors from Other Provinces in China	Private Car	Traveling Alone	1	2–3 Days	Neutral	Yes	1	0	1	0	1	0	1	0	0	1	1	0	0	1	0	0	0	0	1	0	0	0	43	Marginal	Enumerator 4
NC2025-0921	Valid Samples	2025-08-17	Nanchang East Railway Station	Male	25–34years	Associate degree	Visitors from Other Provinces in China	Private Car	Traveling with Partner	0	2–3 Days	Neutral	Yes	1	0	0	1	1	1	0	0	0	1	0	1	1	0	1	1	0	1	0	0	0	0	68	Good	Enumerator 2
NC2025-0922	Valid Samples	2025-07-02	Nanchang Railway Station	Female	≥60years	Associate degree	Visitors from Other Provinces in China	Private Car	Traveling with Friends	0	2–3 Days	Neutral	No	1	0	0	0	0	0	0	0	0	0	0	1	0	0	1	0	0	0	0	0	0	1	64	Good	Enumerator 1
NC2025-0924	Valid Samples	2025-08-21	Nanchang Railway Station	Female	25–34years	High school or below	Visitors from Other Cities in Jiangxi Province	High-Speed Rail / Train	Group Tour	1	4–7 Days	Moderately Concerned	No	1	0	0	1	0	1	0	0	0	1	1	1	1	1	0	0	0	0	0	0	0	1	84	Excellent	Enumerator 3
NC2025-0925	Valid Samples	2025-07-09	Nanchang Railway Station	Female	25–34years	Associate degree	Visitors from Other Provinces in China	Long-Distance Bus	Traveling with Friends	2	More than 7 Days	Moderately Concerned	Yes	1	0	1	0	0	1	0	0	0	0	1	0	0	1	0	0	0	1	0	0	0	0	58	Acceptable	Enumerator 4
NC2025-0926	Valid Samples	2025-07-12	Nanchang South Railway Station	Male	18–24years	Bachelor's degree	Visitors from Other Cities in Jiangxi Province	High-Speed Rail / Train	Traveling with Family/Children	0	4–7 Days	Neutral	No	0	0	0	0	0	1	0	0	0	1	1	1	0	0	0	0	0	0	0	0	0	1	73	Very good	Enumerator 2
NC2025-0927	Valid Samples	2025-08-20	Nanchang West Railway Station	Female	25–34years	Bachelor's degree	Visitors from Other Provinces in China	High-Speed Rail / Train	Traveling with Family/Children	0	Less than Half a Day	Neutral	No	0	0	1	0	0	0	0	0	0	1	0	1	0	0	1	0	0	0	0	0	0	1	63	Good	Enumerator 4
NC2025-0928	Valid Samples	2025-07-10	Nanchang Railway Station	Female	18–24years	High school or below	Visitors from Other Cities in Jiangxi Province	High-Speed Rail / Train	Traveling Alone	3	2–3 Days	Neutral	No	1	0	0	0	0	0	0	0	0	1	1	0	1	1	0	0	0	0	0	0	0	1	53	Acceptable	Enumerator 4
NC2025-0929	Valid Samples	2025-07-03	Nanchang East Railway Station	Male	18–24years	High school or below	Visitors from Other Provinces in China	Local Public Transportation	Traveling Alone	1	2–3 Days	Moderately Concerned	Yes	0	0	1	0	0	0	0	0	0	1	0	0	1	1	0	0	0	0	1	0	0	0	66	Good	Enumerator 4
NC2025-0930	Valid Samples	2025-08-18	Nanchang Railway Station	Male	18–24years	High school or below	Visitors from Other Provinces in China	Private Car	Group Tour	0	Less than Half a Day	Moderately Concerned	Yes	0	1	0	0	0	1	0	0	0	1	0	0	1	0	0	0	0	0	0	0	0	0	71	Very good	Enumerator 4
NC2025-0931	Valid Samples	2025-07-14	Nanchang West Railway Station	Female	25–34years	Associate degree	Visitors from Other Cities in Jiangxi Province	High-Speed Rail / Train	Group Tour	0	2–3 Days	Neutral	No	1	1	0	0	1	1	0	0	0	0	1	0	1	0	0	1	0	0	0	0	0	1	68	Good	Enumerator 2
NC2025-0932	Valid Samples	2025-06-30	Nanchang Railway Station	Female	18–24years	Associate degree	Visitors from Other Provinces in China	Private Car	Traveling with Friends	2	2–3 Days	Moderately Concerned	No	0	0	0	0	0	1	0	0	0	0	0	1	1	1	0	0	0	0	0	0	0	1	55	Acceptable	Enumerator 3
NC2025-0933	Valid Samples	2025-07-07	Nanchang East Railway Station	Female	25–34years	Bachelor's degree	Visitors from Other Cities in Jiangxi Province	High-Speed Rail / Train	Traveling with Friends	0	2–3 Days	Neutral	No	0	1	0	0	0	0	0	0	0	0	0	0	0	1	0	0	0	0	0	0	0	1	69	Good	Enumerator 2
NC2025-0934	Valid Samples	2025-07-09	Nanchang Changbei International Airport	Female	18–24years	Associate degree	Visitors from Other Cities in Jiangxi Province	Private Car	Traveling with Friends	1	2–3 Days	Moderately Concerned	No	1	1	1	0	0	1	0	0	0	1	0	1	0	1	0	0	0	0	0	0	0	1	63	Good	Enumerator 2
NC2025-0935	Valid Samples	2025-07-12	Nanchang West Railway Station	Male	18–24years	Bachelor's degree	Local Visitors from Nanchang	High-Speed Rail / Train	Traveling with Partner	2	2–3 Days	Moderately Concerned	Yes	1	0	0	0	0	0	0	0	0	1	0	1	0	1	0	0	0	0	1	0	0	0	49	Marginal	Enumerator 1
NC2025-0936	Valid Samples	2025-07-19	Nanchang Railway Station	Male	25–34years	Bachelor's degree	Visitors from Other Provinces in China	Private Car	Traveling with Partner	2	4–7 Days	Moderately Concerned	No	0	1	0	0	0	0	0	0	0	1	0	0	1	0	0	0	0	0	0	0	0	1	81	Excellent	Enumerator 1
NC2025-0937	Valid Samples	2025-07-10	Nanchang East Railway Station	Male	35–44years	Bachelor's degree	Visitors from Other Cities in Jiangxi Province	Private Car	Traveling with Friends	0	1 Day	Slightly Concerned	No	1	0	1	1	1	0	0	0	0	1	1	0	0	0	0	0	0	0	0	0	0	1	60	Good	Enumerator 4
NC2025-0939	Valid Samples	2025-07-04	Nanchang East Railway Station	Female	45–59years	Associate degree	Visitors from Other Provinces in China	High-Speed Rail / Train	Traveling with Family/Children	0	1 Day	Very Concerned	No	1	0	1	0	0	0	0	0	0	1	0	1	0	0	0	0	0	0	0	0	0	1	79	Very good	Enumerator 3
NC2025-0940	Valid Samples	2025-07-28	Nanchang East Railway Station	Male	25–34years	Bachelor's degree	Visitors from Other Provinces in China	High-Speed Rail / Train	Traveling with Friends	0	4–7 Days	Moderately Concerned	Yes	1	1	1	1	0	0	1	0	0	1	0	1	1	0	0	0	0	0	0	0	0	0	38	nfavorable	Enumerator 2
NC2025-0941	Valid Samples	2025-08-25	Nanchang West Railway Station	Female	45–59years	Bachelor's degree	Visitors from Other Cities in Jiangxi Province	High-Speed Rail / Train	Traveling with Friends	0	Less than Half a Day	Neutral	No	0	1	1	0	1	0	0	0	0	1	1	0	1	0	0	0	0	0	0	0	0	1	81	Excellent	Enumerator 1
NC2025-0944	Valid Samples	2025-08-20	Nanchang South Railway Station	Male	35–44years	Bachelor's degree	Visitors from Other Provinces in China	High-Speed Rail / Train	Traveling with Friends	0	2–3 Days	Very Concerned	Yes	1	0	0	1	0	1	0	0	0	1	0	1	1	1	0	0	0	0	1	0	0	0	47	Marginal	Enumerator 3
NC2025-0945	Valid Samples	2025-08-05	Nanchang Changbei International Airport	Male	25–34years	Bachelor's degree	Visitors from Other Cities in Jiangxi Province	Private Car	Traveling with Family/Children	0	2–3 Days	Moderately Concerned	Yes	0	1	0	0	0	1	0	0	0	0	1	0	0	0	0	0	0	0	0	0	0	0	47	Marginal	Enumerator 4
NC2025-0946	Valid Samples	2025-08-18	Nanchang East Railway Station	Male	45–59years	Master's degree or above	Visitors from Other Provinces in China	High-Speed Rail / Train	Group Tour	0	1 Day	Neutral	Yes	1	1	0	0	0	1	0	0	0	0	1	1	1	0	0	0	0	0	1	1	0	0	51	Acceptable	Enumerator 4
NC2025-0947	Valid Samples	2025-08-28	Nanchang Railway Station	Female	18–24years	Bachelor's degree	Local Visitors from Nanchang	High-Speed Rail / Train	Group Tour	0	4–7 Days	Moderately Concerned	Yes	1	0	0	0	0	1	0	0	0	1	0	1	0	1	0	0	0	0	0	0	0	0	58	Acceptable	Enumerator 2
NC2025-0948	Valid Samples	2025-08-07	Nanchang Railway Station	Female	25–34years	Bachelor's degree	Local Visitors from Nanchang	High-Speed Rail / Train	Traveling Alone	0	2–3 Days	Moderately Concerned	No	1	0	1	0	0	0	1	0	0	1	1	1	0	0	0	1	0	0	0	0	0	1	62	Good	Enumerator 3
NC2025-0949	Valid Samples	2025-07-22	Nanchang East Railway Station	Female	18–24years	High school or below	Visitors from Other Cities in Jiangxi Province	High-Speed Rail / Train	Traveling with Family/Children	0	2–3 Days	Very Concerned	No	0	0	1	1	0	0	0	0	0	1	1	1	0	0	0	1	0	0	0	0	0	1	66	Good	Enumerator 4
NC2025-0951	Valid Samples	2025-08-27	Nanchang South Railway Station	Male	35–44years	Bachelor's degree	Visitors from Other Provinces in China	High-Speed Rail / Train	Group Tour	0	1 Day	Moderately Concerned	No	1	0	1	0	0	0	0	0	0	0	1	0	0	0	0	0	0	0	0	0	0	1	71	Very good	Enumerator 3
NC2025-0952	Valid Samples	2025-08-26	Nanchang Changbei International Airport	Female	35–44years	Master's degree or above	Visitors from Other Cities in Jiangxi Province	Airplane	Traveling with Friends	0	Less than Half a Day	Neutral	Yes	0	0	1	0	0	0	0	0	0	1	0	1	1	0	0	1	1	1	0	0	0	0	80	Excellent	Enumerator 3
NC2025-0953	Valid Samples	2025-07-30	Nanchang Changbei International Airport	Female	25–34years	Bachelor's degree	Visitors from Other Cities in Jiangxi Province	Private Car	Traveling with Family/Children	2	2–3 Days	Moderately Concerned	Yes	1	1	0	1	0	1	0	0	0	0	0	0	0	0	0	1	0	1	0	0	0	0	75	Very good	Enumerator 1
NC2025-0954	Valid Samples	2025-08-04	Nanchang Railway Station	Female	18–24years	Associate degree	Visitors from Other Cities in Jiangxi Province	High-Speed Rail / Train	Traveling with Friends	1	More than 7 Days	Neutral	No	0	1	1	1	0	0	0	0	0	1	0	0	1	0	0	0	0	0	0	0	0	1	53	Acceptable	Enumerator 4
NC2025-0955	Valid Samples	2025-08-16	Nanchang East Railway Station	Female	25–34years	Bachelor's degree	Visitors from Other Cities in Jiangxi Province	High-Speed Rail / Train	Traveling with Family/Children	0	4–7 Days	Moderately Concerned	No	1	1	1	1	0	1	0	0	0	1	0	0	1	0	1	1	0	0	0	0	0	1	94	Ideal	Enumerator 3
NC2025-0956	Valid Samples	2025-08-27	Nanchang South Railway Station	Female	18–24years	Bachelor's degree	Visitors from Other Provinces in China	High-Speed Rail / Train	Group Tour	1	2–3 Days	Moderately Concerned	Yes	1	1	0	0	1	1	0	0	0	0	0	1	0	1	0	0	0	0	0	0	0	0	69	Good	Enumerator 2
NC2025-0957	Valid Samples	2025-07-18	Nanchang East Railway Station	Female	25–34years	Bachelor's degree	Visitors from Other Provinces in China	Private Car	Traveling with Family/Children	0	1 Day	Moderately Concerned	Yes	1	0	0	0	1	1	0	0	0	1	1	1	0	0	0	0	1	0	1	0	1	0	55	Acceptable	Enumerator 3
NC2025-0958	Valid Samples	2025-07-01	Nanchang South Railway Station	Female	45–59years	Bachelor's degree	Visitors from Other Provinces in China	High-Speed Rail / Train	Traveling with Family/Children	1	2–3 Days	Neutral	Yes	1	1	0	0	0	1	1	0	0	1	0	1	0	0	0	0	1	0	1	0	0	0	59	Acceptable	Enumerator 4
NC2025-0960	Valid Samples	2025-06-30	Nanchang Changbei International Airport	Male	18–24years	Associate degree	Visitors from Other Provinces in China	Airplane	Traveling Alone	1	1 Day	Moderately Concerned	Yes	0	0	0	0	0	0	0	0	0	0	0	1	0	0	0	1	0	0	0	0	0	0	71	Very good	Enumerator 1
NC2025-0961	Valid Samples	2025-06-30	Nanchang South Railway Station	Male	35–44years	Associate degree	Visitors from Other Cities in Jiangxi Province	High-Speed Rail / Train	Traveling with Family/Children	0	2–3 Days	Neutral	Yes	0	1	0	0	0	0	1	0	0	0	1	0	1	0	0	0	0	1	0	0	0	0	71	Very good	Enumerator 3
NC2025-0962	Valid Samples	2025-08-12	Nanchang Changbei International Airport	Male	18–24years	Master's degree or above	Visitors from Other Provinces in China	Airplane	Traveling with Friends	0	1 Day	Moderately Concerned	No	1	1	1	0	0	1	0	0	0	0	1	1	0	1	0	0	0	0	0	0	0	1	55	Acceptable	Enumerator 1
NC2025-0963	Valid Samples	2025-07-26	Nanchang West Railway Station	Female	18–24years	Bachelor's degree	Visitors from Other Provinces in China	Other	Traveling with Friends	2	1 Day	Moderately Concerned	Yes	0	0	1	0	0	1	1	0	0	1	0	1	0	0	0	0	1	0	0	0	0	0	100	Ideal	Enumerator 4
NC2025-0964	Valid Samples	2025-07-27	Nanchang South Railway Station	Female	18–24years	Bachelor's degree	Visitors from Other Provinces in China	High-Speed Rail / Train	Traveling with Friends	0	1 Day	Moderately Concerned	No	1	0	0	0	1	0	0	0	0	1	0	0	0	1	0	0	0	0	0	0	0	1	53	Acceptable	Enumerator 1
NC2025-0966	Valid Samples	2025-07-17	Nanchang Railway Station	Male	≥60years	Bachelor's degree	Visitors from Other Provinces in China	Private Car	Traveling with Family/Children	0	4–7 Days	Neutral	Yes	1	0	0	0	0	0	0	0	0	0	1	0	1	0	0	1	0	0	1	0	0	0	59	Acceptable	Enumerator 3
NC2025-0967	Valid Samples	2025-08-20	Nanchang East Railway Station	Female	35–44years	Associate degree	Visitors from Other Cities in Jiangxi Province	High-Speed Rail / Train	Traveling with Family/Children	0	1 Day	Moderately Concerned	Yes	1	1	0	0	0	1	0	0	0	0	0	0	0	0	1	0	0	1	0	0	0	0	45	Marginal	Enumerator 3
NC2025-0968	Valid Samples	2025-07-21	Nanchang West Railway Station	Female	25–34years	High school or below	Visitors from Other Cities in Jiangxi Province	Long-Distance Bus	Traveling with Friends	0	1 Day	Very Concerned	No	1	0	1	0	1	1	0	0	0	0	0	0	1	0	0	0	0	0	0	0	0	1	61	Good	Enumerator 4
NC2025-0969	Valid Samples	2025-08-13	Nanchang South Railway Station	Female	35–44years	Associate degree	Visitors from Other Provinces in China	High-Speed Rail / Train	Traveling with Family/Children	0	2–3 Days	Moderately Concerned	No	1	0	1	1	1	0	0	0	0	0	0	0	1	1	0	0	0	0	0	0	0	1	50	Acceptable	Enumerator 3
NC2025-0970	Valid Samples	2025-07-21	Nanchang Railway Station	Female	35–44years	Bachelor's degree	Visitors from Other Cities in Jiangxi Province	Private Car	Traveling with Family/Children	0	Less than Half a Day	Moderately Concerned	No	1	0	0	1	1	0	0	0	0	1	1	1	0	0	0	1	0	0	0	0	0	1	64	Good	Enumerator 1
NC2025-0971	Valid Samples	2025-08-29	Nanchang West Railway Station	Female	25–34years	Associate degree	Visitors from Other Provinces in China	High-Speed Rail / Train	Traveling with Family/Children	0	4–7 Days	Moderately Concerned	No	1	0	0	0	1	1	1	0	0	1	0	1	1	0	0	0	0	0	0	0	0	1	65	Good	Enumerator 2
NC2025-0972	Valid Samples	2025-08-26	Nanchang Changbei International Airport	Female	25–34years	High school or below	Visitors from Other Cities in Jiangxi Province	Airplane	Traveling with Friends	2	Less than Half a Day	Moderately Concerned	No	0	0	0	0	0	1	0	0	0	1	1	1	1	1	0	0	0	0	0	0	0	1	69	Good	Enumerator 1
NC2025-0973	Valid Samples	2025-08-10	Nanchang East Railway Station	Female	18–24years	Master's degree or above	Visitors from Other Provinces in China	High-Speed Rail / Train	Traveling with Family/Children	0	4–7 Days	Moderately Concerned	No	0	0	1	1	1	0	0	0	1	1	1	0	0	1	0	0	0	0	0	0	0	1	55	Acceptable	Enumerator 3
NC2025-0974	Valid Samples	2025-08-23	Nanchang West Railway Station	Female	18–24years	High school or below	Visitors from Other Cities in Jiangxi Province	High-Speed Rail / Train	Group Tour	0	1 Day	Moderately Concerned	Yes	1	0	0	0	0	0	1	0	0	0	1	1	0	1	0	1	0	1	0	0	0	0	48	Marginal	Enumerator 2
NC2025-0975	Valid Samples	2025-07-26	Nanchang Changbei International Airport	Female	25–34years	Bachelor's degree	Visitors from Other Cities in Jiangxi Province	Airplane	Traveling Alone	0	1 Day	Neutral	No	0	1	1	0	0	1	0	1	0	0	0	1	0	0	0	0	0	0	0	0	0	1	61	Good	Enumerator 2
NC2025-0977	Valid Samples	2025-07-10	Nanchang Changbei International Airport	Female	25–34years	Bachelor's degree	Visitors from Other Provinces in China	Airplane	Group Tour	3	Less than Half a Day	Neutral	No	0	0	0	1	0	0	0	0	0	0	1	0	1	1	1	0	0	0	0	0	0	1	61	Good	Enumerator 2
NC2025-0978	Valid Samples	2025-08-27	Nanchang East Railway Station	Female	25–34years	Bachelor's degree	Visitors from Other Cities in Jiangxi Province	High-Speed Rail / Train	Traveling with Family/Children	2	4–7 Days	Very Concerned	No	0	0	1	0	0	1	0	0	0	0	0	1	1	0	0	0	0	0	0	0	0	1	82	Excellent	Enumerator 2
NC2025-0979	Valid Samples	2025-08-29	Nanchang West Railway Station	Male	18–24years	Master's degree or above	Visitors from Other Provinces in China	Private Car	Traveling with Friends	4	2–3 Days	Neutral	Yes	1	0	0	0	0	0	1	0	0	0	0	1	0	1	0	0	0	0	1	0	0	0	53	Acceptable	Enumerator 3
NC2025-0980	Valid Samples	2025-07-30	Nanchang East Railway Station	Male	25–34years	Bachelor's degree	Visitors from Other Cities in Jiangxi Province	High-Speed Rail / Train	Traveling with Partner	0	4–7 Days	Moderately Concerned	No	1	0	1	0	0	0	0	0	0	0	0	1	1	1	0	0	0	0	0	0	0	1	67	Good	Enumerator 2
NC2025-0981	Valid Samples	2025-07-10	Nanchang Railway Station	Female	18–24years	Master's degree or above	Local Visitors from Nanchang	Long-Distance Bus	Traveling with Family/Children	0	2–3 Days	Moderately Concerned	No	0	1	1	1	1	1	0	0	0	0	1	0	0	0	0	1	0	0	0	0	0	1	96	Ideal	Enumerator 1
NC2025-0982	Valid Samples	2025-08-12	Nanchang Changbei International Airport	Male	45–59years	Bachelor's degree	Local Visitors from Nanchang	Airplane	Traveling Alone	1	Less than Half a Day	Moderately Concerned	Yes	0	0	1	1	0	1	0	0	0	1	1	0	0	0	0	1	1	1	0	1	0	0	69	Good	Enumerator 2
NC2025-0983	Valid Samples	2025-07-03	Nanchang West Railway Station	Female	18–24years	Master's degree or above	Visitors from Other Provinces in China	High-Speed Rail / Train	Traveling with Partner	1	1 Day	Moderately Concerned	No	0	0	1	1	0	0	0	0	0	0	0	1	0	0	0	1	0	0	0	0	0	1	86	Excellent	Enumerator 3
NC2025-0984	Valid Samples	2025-07-22	Nanchang Railway Station	Female	25–34years	Bachelor's degree	Visitors from Other Provinces in China	Private Car	Traveling with Friends	0	2–3 Days	Very Concerned	No	1	0	1	0	1	1	1	0	0	1	1	1	0	0	1	1	0	0	0	0	0	1	72	Very good	Enumerator 1
NC2025-0985	Valid Samples	2025-07-16	Nanchang Railway Station	Male	18–24years	Associate degree	Local Visitors from Nanchang	Private Car	Traveling with Partner	0	4–7 Days	Slightly Concerned	Yes	1	0	0	0	1	0	0	0	0	0	1	1	0	0	0	0	0	1	0	0	1	0	75	Very good	Enumerator 1
NC2025-0986	Valid Samples	2025-07-06	Nanchang West Railway Station	Male	18–24years	Bachelor's degree	Visitors from Other Provinces in China	High-Speed Rail / Train	Traveling with Family/Children	2	More than 7 Days	Very Concerned	Yes	1	0	1	0	1	0	0	0	0	1	0	1	0	0	0	1	1	0	0	0	0	0	76	Very good	Enumerator 3
NC2025-0988	Valid Samples	2025-08-03	Nanchang West Railway Station	Male	25–34years	Associate degree	Visitors from Other Cities in Jiangxi Province	Private Car	Traveling with Friends	0	1 Day	Very Concerned	Yes	1	0	0	0	0	1	0	0	0	0	1	1	0	0	0	0	0	0	1	0	0	0	74	Very good	Enumerator 2
NC2025-0990	Valid Samples	2025-07-16	Nanchang Changbei International Airport	Female	25–34years	Bachelor's degree	Visitors from Other Cities in Jiangxi Province	Private Car	Traveling with Friends	2	1 Day	Moderately Concerned	Yes	0	1	0	0	0	0	0	0	0	0	1	1	0	0	0	0	1	0	0	1	0	0	73	Very good	Enumerator 4
NC2025-0991	Valid Samples	2025-08-14	Nanchang South Railway Station	Female	35–44years	Bachelor's degree	Visitors from Other Provinces in China	High-Speed Rail / Train	Traveling with Family/Children	1	1 Day	Neutral	Yes	1	1	1	0	0	1	0	0	0	1	1	0	1	0	0	0	0	0	0	0	0	0	57	Acceptable	Enumerator 4
NC2025-0992	Valid Samples	2025-08-23	Nanchang South Railway Station	Male	25–34years	Associate degree	Visitors from Other Provinces in China	High-Speed Rail / Train	Traveling with Family/Children	0	2–3 Days	Neutral	Yes	1	1	0	1	0	0	0	0	0	1	1	1	1	1	0	0	0	1	0	0	0	0	79	Very good	Enumerator 1
NC2025-0995	Valid Samples	2025-08-14	Nanchang Changbei International Airport	Male	18–24years	Bachelor's degree	Visitors from Other Provinces in China	Private Car	Group Tour	0	2–3 Days	Neutral	No	1	1	0	1	1	0	0	0	0	0	0	1	0	0	0	1	0	0	0	0	0	1	88	Excellent	Enumerator 1
NC2025-0996	Valid Samples	2025-07-21	Nanchang Railway Station	Female	35–44years	Bachelor's degree	Visitors from Other Provinces in China	High-Speed Rail / Train	Traveling with Friends	0	1 Day	Neutral	Yes	1	1	0	0	0	1	0	0	0	0	0	1	0	0	1	0	0	0	0	0	0	0	63	Good	Enumerator 2
NC2025-0997	Valid Samples	2025-07-11	Nanchang Changbei International Airport	Female	35–44years	Associate degree	Visitors from Other Provinces in China	Airplane	Traveling with Family/Children	0	1 Day	Neutral	Yes	1	0	1	0	0	1	0	0	0	1	0	1	0	0	0	0	0	0	0	1	0	0	75	Very good	Enumerator 4
NC2025-0998	Valid Samples	2025-08-15	Nanchang West Railway Station	Male	25–34years	Associate degree	Local Visitors from Nanchang	Other	Traveling with Family/Children	0	1 Day	Neutral	Yes	1	0	1	0	0	0	0	0	0	0	1	1	1	0	0	0	1	1	0	1	0	0	94	Ideal	Enumerator 2
NC2025-0999	Valid Samples	2025-07-13	Nanchang West Railway Station	Female	18–24years	Master's degree or above	Local Visitors from Nanchang	Private Car	Traveling with Family/Children	0	4–7 Days	Very Concerned	No	1	1	0	0	0	0	0	0	0	0	0	0	0	1	0	1	0	0	0	0	0	1	77	Very good	Enumerator 1
NC2025-1000	Valid Samples	2025-07-24	Nanchang West Railway Station	Male	18–24years	Bachelor's degree	Visitors from Other Provinces in China	High-Speed Rail / Train	Traveling with Friends	0	4–7 Days	Moderately Concerned	Yes	1	0	1	1	0	1	0	0	1	1	1	0	1	0	0	0	1	0	0	0	0	0	68	Good	Enumerator 3
NC2025-1001	Valid Samples	2025-07-16	Nanchang Railway Station	Male	25–34years	Bachelor's degree	Visitors from Other Provinces in China	High-Speed Rail / Train	Traveling with Family/Children	0	1 Day	Neutral	Yes	0	0	0	0	0	1	0	0	0	1	0	1	0	0	0	0	0	1	0	0	0	0	52	Acceptable	Enumerator 2
NC2025-1002	Valid Samples	2025-07-28	Nanchang Railway Station	Female	25–34years	Master's degree or above	Visitors from Other Cities in Jiangxi Province	High-Speed Rail / Train	Traveling with Friends	0	4–7 Days	Neutral	No	1	0	1	0	1	1	0	0	0	1	0	0	1	0	0	1	0	0	0	0	0	1	64	Good	Enumerator 3
NC2025-1003	Valid Samples	2025-08-03	Nanchang Railway Station	Male	25–34years	Associate degree	Visitors from Other Provinces in China	High-Speed Rail / Train	Group Tour	1	Less than Half a Day	Moderately Concerned	Yes	0	0	0	0	1	0	0	0	1	1	0	0	0	0	0	0	0	0	0	0	0	0	52	Acceptable	Enumerator 3
NC2025-1005	Valid Samples	2025-07-12	Nanchang Railway Station	Male	18–24years	Bachelor's degree	Local Visitors from Nanchang	Local Public Transportation	Group Tour	1	2–3 Days	Very Concerned	No	0	1	0	0	0	1	0	0	0	1	0	0	1	0	0	0	0	0	0	0	0	1	56	Acceptable	Enumerator 3
NC2025-1006	Valid Samples	2025-08-29	Nanchang Railway Station	Female	25–34years	Associate degree	Visitors from Other Cities in Jiangxi Province	High-Speed Rail / Train	Traveling Alone	0	1 Day	Very Concerned	No	1	0	0	0	0	0	0	0	0	0	0	1	0	0	0	0	0	0	0	0	0	1	79	Very good	Enumerator 4
NC2025-1007	Valid Samples	2025-08-24	Nanchang South Railway Station	Female	35–44years	Bachelor's degree	Visitors from Other Provinces in China	High-Speed Rail / Train	Group Tour	0	2–3 Days	Not Concerned at All	Yes	1	0	0	0	0	0	1	0	0	0	1	0	0	0	0	0	0	0	1	0	0	0	78	Very good	Enumerator 2
NC2025-1008	Valid Samples	2025-08-18	Nanchang South Railway Station	Female	18–24years	Bachelor's degree	Visitors from Other Cities in Jiangxi Province	High-Speed Rail / Train	Group Tour	0	2–3 Days	Moderately Concerned	Yes	1	0	1	0	1	0	1	0	0	0	1	1	0	0	0	0	0	0	0	0	0	0	44	Marginal	Enumerator 4
NC2025-1010	Valid Samples	2025-07-16	Nanchang East Railway Station	Male	25–34years	Associate degree	Visitors from Other Provinces in China	Private Car	Traveling with Family/Children	0	1 Day	Neutral	No	0	0	1	0	0	1	0	0	0	1	0	1	0	0	0	0	0	0	0	0	0	1	48	Marginal	Enumerator 1
NC2025-1011	Valid Samples	2025-08-18	Nanchang Changbei International Airport	Female	45–59years	Associate degree	Visitors from Other Cities in Jiangxi Province	Airplane	Traveling with Friends	4	4–7 Days	Slightly Concerned	No	1	0	1	0	1	0	1	0	0	1	0	0	1	0	0	1	0	0	0	0	0	1	72	Very good	Enumerator 4
NC2025-1012	Valid Samples	2025-07-17	Nanchang Railway Station	Female	25–34years	Bachelor's degree	Visitors from Other Provinces in China	Local Public Transportation	Traveling with Friends	0	2–3 Days	Slightly Concerned	No	1	0	1	0	1	1	1	0	0	1	1	1	1	0	0	0	0	0	0	0	0	1	57	Acceptable	Enumerator 2
NC2025-1013	Valid Samples	2025-08-11	Nanchang Changbei International Airport	Female	25–34years	Bachelor's degree	Visitors from Other Provinces in China	Airplane	Group Tour	1	2–3 Days	Moderately Concerned	Yes	0	1	0	0	0	0	1	0	0	1	1	1	0	0	0	0	0	0	0	0	0	0	55	Acceptable	Enumerator 4
NC2025-1014	Valid Samples	2025-07-31	Nanchang East Railway Station	Female	35–44years	High school or below	Visitors from Other Provinces in China	High-Speed Rail / Train	Traveling with Partner	1	2–3 Days	Slightly Concerned	No	0	0	0	0	1	0	0	0	0	0	0	1	0	0	0	1	0	0	0	0	0	1	72	Very good	Enumerator 4
NC2025-1015	Valid Samples	2025-08-18	Nanchang East Railway Station	Female	18–24years	High school or below	Visitors from Other Cities in Jiangxi Province	High-Speed Rail / Train	Traveling with Friends	1	Less than Half a Day	Very Concerned	No	1	1	1	1	1	0	0	0	0	1	1	0	1	0	0	1	0	0	0	0	0	1	76	Very good	Enumerator 4
NC2025-1016	Valid Samples	2025-08-29	Nanchang West Railway Station	Female	18–24years	Associate degree	Visitors from Other Provinces in China	Private Car	Traveling with Friends	1	Less than Half a Day	Moderately Concerned	No	1	0	1	1	0	0	0	0	0	1	0	0	0	0	0	0	0	0	0	0	0	1	51	Acceptable	Enumerator 3
NC2025-1017	Valid Samples	2025-08-08	Nanchang East Railway Station	Male	35–44years	Bachelor's degree	Visitors from Other Provinces in China	Private Car	Traveling with Partner	0	2–3 Days	Very Concerned	Yes	0	0	1	0	0	0	0	0	0	0	0	1	1	0	0	0	0	1	1	0	0	0	49	Marginal	Enumerator 1
NC2025-1018	Valid Samples	2025-07-07	Nanchang East Railway Station	Female	25–34years	Bachelor's degree	Visitors from Other Provinces in China	High-Speed Rail / Train	Group Tour	0	1 Day	Neutral	No	1	0	1	0	0	0	0	0	1	1	0	1	1	0	0	0	0	0	0	0	0	1	72	Very good	Enumerator 4
NC2025-1019	Valid Samples	2025-07-30	Nanchang East Railway Station	Female	25–34years	Associate degree	Visitors from Other Provinces in China	Local Public Transportation	Traveling with Friends	0	Less than Half a Day	Moderately Concerned	No	0	0	1	1	0	0	0	0	0	0	0	1	1	0	0	0	0	0	0	0	0	1	74	Very good	Enumerator 3
NC2025-1020	Valid Samples	2025-08-15	Nanchang East Railway Station	Male	35–44years	Associate degree	Visitors from Other Provinces in China	Private Car	Traveling with Friends	0	1 Day	Moderately Concerned	Yes	0	0	0	1	0	1	0	0	0	1	0	1	0	0	0	0	0	0	0	0	0	0	67	Good	Enumerator 1
NC2025-1021	Valid Samples	2025-08-24	Nanchang South Railway Station	Male	25–34years	Bachelor's degree	Local Visitors from Nanchang	High-Speed Rail / Train	Traveling with Friends	4	2–3 Days	Very Concerned	Yes	1	1	0	0	1	1	0	0	0	0	0	0	1	0	0	0	0	0	0	0	0	0	73	Very good	Enumerator 4
NC2025-1022	Valid Samples	2025-08-28	Nanchang East Railway Station	Female	45–59years	Bachelor's degree	Visitors from Other Cities in Jiangxi Province	High-Speed Rail / Train	Traveling with Friends	0	2–3 Days	Very Concerned	Yes	0	0	0	0	0	1	0	0	0	0	1	1	1	0	1	0	0	0	0	0	0	0	57	Acceptable	Enumerator 1
NC2025-1023	Valid Samples	2025-07-28	Nanchang West Railway Station	Female	45–59years	Bachelor's degree	Visitors from Other Cities in Jiangxi Province	High-Speed Rail / Train	Traveling with Friends	0	2–3 Days	Moderately Concerned	No	0	0	1	0	0	0	1	0	0	0	0	0	1	0	0	0	0	0	0	0	0	1	64	Good	Enumerator 4
NC2025-1024	Valid Samples	2025-07-21	Nanchang East Railway Station	Female	≥60years	Bachelor's degree	Visitors from Other Provinces in China	High-Speed Rail / Train	Traveling with Family/Children	1	2–3 Days	Slightly Concerned	Yes	0	0	0	1	0	0	0	0	0	0	1	1	1	0	0	0	0	0	0	0	0	0	77	Very good	Enumerator 2
NC2025-1025	Valid Samples	2025-08-11	Nanchang West Railway Station	Male	25–34years	Bachelor's degree	Visitors from Other Provinces in China	High-Speed Rail / Train	Traveling with Family/Children	2	2–3 Days	Neutral	No	1	1	1	0	0	0	0	0	0	0	0	0	0	0	0	0	0	0	0	0	0	1	87	Excellent	Enumerator 4
NC2025-1026	Valid Samples	2025-07-12	Nanchang East Railway Station	Female	18–24years	Bachelor's degree	Visitors from Other Provinces in China	Private Car	Traveling with Family/Children	0	4–7 Days	Moderately Concerned	No	1	1	0	0	0	0	0	1	0	0	1	0	0	1	0	0	0	0	0	0	0	1	83	Excellent	Enumerator 1
NC2025-1027	Valid Samples	2025-07-19	Nanchang East Railway Station	Female	35–44years	Bachelor's degree	Visitors from Other Provinces in China	High-Speed Rail / Train	Group Tour	0	2–3 Days	Very Concerned	No	0	1	0	0	1	0	0	0	0	1	0	1	0	0	1	1	0	0	0	0	0	1	80	Excellent	Enumerator 1
NC2025-1028	Valid Samples	2025-07-22	Nanchang Changbei International Airport	Female	25–34years	Bachelor's degree	Visitors from Other Provinces in China	Airplane	Traveling with Family/Children	0	4–7 Days	Very Concerned	No	1	1	0	1	0	0	0	0	0	0	1	1	0	1	0	0	0	0	0	0	0	1	74	Very good	Enumerator 2
NC2025-1029	Valid Samples	2025-07-23	Nanchang East Railway Station	Female	35–44years	High school or below	Visitors from Other Cities in Jiangxi Province	Private Car	Traveling with Family/Children	0	2–3 Days	Very Concerned	No	0	1	0	1	0	0	0	0	0	0	0	0	0	0	0	0	0	0	0	0	0	1	83	Excellent	Enumerator 3
NC2025-1030	Valid Samples	2025-08-28	Nanchang Railway Station	Female	35–44years	Master's degree or above	Visitors from Other Provinces in China	High-Speed Rail / Train	Traveling with Family/Children	0	4–7 Days	Slightly Concerned	No	1	1	1	1	1	0	1	0	0	1	0	1	1	0	1	0	0	0	0	0	0	1	65	Good	Enumerator 3
NC2025-1031	Valid Samples	2025-08-28	Nanchang East Railway Station	Male	35–44years	High school or below	Visitors from Other Provinces in China	High-Speed Rail / Train	Traveling with Partner	1	Less than Half a Day	Very Concerned	No	0	0	1	1	0	0	0	0	0	1	1	0	0	0	0	0	0	0	0	0	0	1	58	Acceptable	Enumerator 2
NC2025-1032	Valid Samples	2025-07-26	Nanchang Railway Station	Male	18–24years	Master's degree or above	Visitors from Other Cities in Jiangxi Province	Private Car	Traveling with Partner	0	1 Day	Neutral	No	1	1	0	1	1	0	0	0	0	1	0	1	0	0	0	0	0	0	0	0	0	1	60	Good	Enumerator 4
NC2025-1033	Valid Samples	2025-07-14	Nanchang East Railway Station	Female	18–24years	Associate degree	Visitors from Other Provinces in China	High-Speed Rail / Train	Traveling with Partner	0	4–7 Days	Slightly Concerned	No	0	0	1	1	1	1	0	0	0	1	0	0	1	1	1	0	0	0	0	0	0	1	62	Good	Enumerator 4
NC2025-1035	Valid Samples	2025-08-12	Nanchang South Railway Station	Female	18–24years	Master's degree or above	Visitors from Other Provinces in China	High-Speed Rail / Train	Group Tour	2	4–7 Days	Slightly Concerned	No	1	0	0	1	0	1	0	0	0	1	0	0	1	0	0	0	0	0	0	0	0	1	73	Very good	Enumerator 1
NC2025-1036	Valid Samples	2025-08-28	Nanchang South Railway Station	Female	25–34years	Bachelor's degree	Visitors from Other Provinces in China	High-Speed Rail / Train	Group Tour	1	2–3 Days	Very Concerned	No	1	1	0	1	0	0	0	0	0	1	0	1	1	0	0	0	0	0	0	0	0	1	52	Acceptable	Enumerator 2
NC2025-1037	Valid Samples	2025-08-10	Nanchang Changbei International Airport	Male	35–44years	Bachelor's degree	Local Visitors from Nanchang	Airplane	Traveling with Partner	0	4–7 Days	Moderately Concerned	No	1	0	0	0	1	1	0	0	0	1	0	1	0	0	0	0	0	0	0	0	0	1	58	Acceptable	Enumerator 4
NC2025-1038	Valid Samples	2025-07-11	Nanchang East Railway Station	Male	25–34years	High school or below	Visitors from Other Provinces in China	High-Speed Rail / Train	Traveling with Friends	0	4–7 Days	Moderately Concerned	No	1	0	1	1	0	0	1	0	0	1	1	0	0	0	0	0	0	0	0	0	0	1	69	Good	Enumerator 4
NC2025-1039	Valid Samples	2025-07-25	Nanchang South Railway Station	Female	25–34years	Associate degree	Visitors from Other Provinces in China	High-Speed Rail / Train	Traveling with Family/Children	0	More than 7 Days	Neutral	No	1	1	1	1	0	0	1	0	0	1	0	0	0	0	0	0	0	0	0	0	0	1	83	Excellent	Enumerator 2
NC2025-1040	Valid Samples	2025-07-09	Nanchang Changbei International Airport	Male	18–24years	Master's degree or above	Visitors from Other Provinces in China	Private Car	Traveling with Family/Children	1	2–3 Days	Very Concerned	No	1	1	1	1	1	1	0	0	0	0	0	0	1	1	0	0	0	0	0	0	0	1	58	Acceptable	Enumerator 2
NC2025-1041	Valid Samples	2025-08-20	Nanchang South Railway Station	Male	25–34years	Master's degree or above	Visitors from Other Cities in Jiangxi Province	High-Speed Rail / Train	Group Tour	2	2–3 Days	Neutral	Yes	0	0	0	1	0	0	0	0	0	1	0	0	0	1	0	0	1	0	1	0	0	0	65	Good	Enumerator 4
NC2025-1042	Valid Samples	2025-08-10	Nanchang South Railway Station	Female	35–44years	Associate degree	Visitors from Other Provinces in China	High-Speed Rail / Train	Traveling with Family/Children	0	2–3 Days	Moderately Concerned	No	1	1	0	1	0	0	0	0	0	0	0	0	1	0	0	0	0	0	0	0	0	1	61	Good	Enumerator 3
NC2025-1043	Valid Samples	2025-08-12	Nanchang West Railway Station	Female	18–24years	Bachelor's degree	Local Visitors from Nanchang	High-Speed Rail / Train	Group Tour	0	4–7 Days	Very Concerned	Yes	0	0	0	0	0	0	0	0	0	0	0	0	0	0	0	0	1	0	0	0	0	0	76	Very good	Enumerator 3
NC2025-1044	Valid Samples	2025-07-09	Nanchang Railway Station	Female	18–24years	Associate degree	Visitors from Other Cities in Jiangxi Province	High-Speed Rail / Train	Traveling with Partner	0	1 Day	Very Concerned	No	1	1	1	1	0	0	0	0	0	0	1	0	1	0	0	0	0	0	0	0	0	1	55	Acceptable	Enumerator 1
NC2025-1045	Valid Samples	2025-07-19	Nanchang Changbei International Airport	Male	25–34years	Bachelor's degree	Visitors from Other Provinces in China	Private Car	Group Tour	0	4–7 Days	Moderately Concerned	No	1	0	0	1	0	1	0	0	0	1	0	1	0	1	1	0	0	0	0	0	0	1	59	Acceptable	Enumerator 2
NC2025-1046	Valid Samples	2025-07-21	Nanchang West Railway Station	Female	18–24years	Master's degree or above	Local Visitors from Nanchang	High-Speed Rail / Train	Traveling with Family/Children	2	4–7 Days	Moderately Concerned	No	1	0	1	1	0	1	0	0	0	0	1	1	1	1	0	0	0	0	0	0	0	1	69	Good	Enumerator 4
NC2025-1047	Valid Samples	2025-07-30	Nanchang West Railway Station	Male	18–24years	Bachelor's degree	Visitors from Other Cities in Jiangxi Province	Private Car	Traveling with Friends	2	2–3 Days	Moderately Concerned	Yes	1	0	0	1	0	1	0	1	0	0	0	0	1	0	0	0	0	1	0	0	0	0	75	Very good	Enumerator 4
NC2025-1048	Valid Samples	2025-08-05	Nanchang Railway Station	Female	25–34years	Bachelor's degree	Visitors from Other Provinces in China	High-Speed Rail / Train	Traveling with Partner	0	1 Day	Moderately Concerned	Yes	0	0	1	1	0	0	0	0	0	1	0	1	0	0	0	1	1	1	0	0	0	0	76	Very good	Enumerator 1
NC2025-1049	Valid Samples	2025-08-07	Nanchang Changbei International Airport	Female	25–34years	Bachelor's degree	Local Visitors from Nanchang	Airplane	Traveling with Friends	0	Less than Half a Day	Neutral	No	1	0	1	0	0	0	0	0	0	0	1	1	0	0	0	0	0	0	0	0	0	1	60	Good	Enumerator 3
NC2025-1050	Valid Samples	2025-08-30	Nanchang Changbei International Airport	Male	≥60years	Bachelor's degree	Visitors from Other Provinces in China	Private Car	Traveling with Friends	0	2–3 Days	Very Concerned	Yes	1	0	1	0	1	1	0	0	0	1	0	1	0	0	1	0	0	0	0	0	1	0	79	Very good	Enumerator 3
NC2025-1051	Valid Samples	2025-07-18	Nanchang Railway Station	Male	45–59years	Bachelor's degree	Visitors from Other Provinces in China	High-Speed Rail / Train	Traveling with Family/Children	0	1 Day	Neutral	No	0	1	1	0	1	1	0	0	0	1	0	1	0	0	0	0	0	0	0	0	0	1	57	Acceptable	Enumerator 1
NC2025-1052	Valid Samples	2025-08-06	Nanchang Changbei International Airport	Female	18–24years	Bachelor's degree	Visitors from Other Cities in Jiangxi Province	Private Car	Traveling Alone	0	2–3 Days	Very Concerned	Yes	1	1	0	1	0	0	0	0	0	1	1	0	1	0	0	0	0	0	0	1	0	0	34	nfavorable	Enumerator 3
NC2025-1053	Valid Samples	2025-08-14	Nanchang East Railway Station	Male	25–34years	High school or below	Visitors from Other Provinces in China	Private Car	Traveling with Friends	1	2–3 Days	Moderately Concerned	No	1	0	1	0	1	1	0	0	0	1	0	0	0	0	0	0	0	0	0	0	0	1	69	Good	Enumerator 3
NC2025-1054	Valid Samples	2025-07-28	Nanchang Railway Station	Female	18–24years	Master's degree or above	Local Visitors from Nanchang	High-Speed Rail / Train	Traveling with Partner	0	4–7 Days	Moderately Concerned	Yes	0	1	1	0	0	0	0	0	0	1	1	0	1	0	0	0	0	0	0	0	0	0	44	Marginal	Enumerator 4
NC2025-1055	Valid Samples	2025-08-26	Nanchang Changbei International Airport	Male	35–44years	Master's degree or above	Visitors from Other Provinces in China	Airplane	Group Tour	0	2–3 Days	Neutral	No	1	0	1	0	1	0	0	0	0	0	0	1	1	0	0	1	0	0	0	0	0	1	73	Very good	Enumerator 3
NC2025-1056	Valid Samples	2025-08-29	Nanchang West Railway Station	Male	35–44years	Bachelor's degree	Visitors from Other Cities in Jiangxi Province	High-Speed Rail / Train	Group Tour	3	More than 7 Days	Moderately Concerned	No	1	0	0	0	1	0	0	0	0	0	0	0	1	0	0	0	0	0	0	0	0	1	99	Ideal	Enumerator 2
NC2025-1057	Valid Samples	2025-07-12	Nanchang Railway Station	Female	35–44years	Associate degree	Visitors from Other Provinces in China	Local Public Transportation	Group Tour	0	2–3 Days	Moderately Concerned	No	1	0	0	1	0	1	0	0	0	0	0	1	0	0	0	0	0	0	0	0	0	1	91	Ideal	Enumerator 2
NC2025-1058	Valid Samples	2025-08-11	Nanchang West Railway Station	Female	25–34years	Associate degree	Visitors from Other Provinces in China	Private Car	Traveling with Partner	0	2–3 Days	Very Concerned	No	1	1	0	0	1	0	0	0	0	1	0	1	1	0	0	0	0	0	0	0	0	1	64	Good	Enumerator 4
NC2025-1059	Valid Samples	2025-08-15	Nanchang East Railway Station	Female	35–44years	High school or below	Local Visitors from Nanchang	High-Speed Rail / Train	Traveling with Family/Children	0	2–3 Days	Moderately Concerned	No	0	1	0	0	1	0	0	1	0	0	1	1	0	0	0	0	0	0	0	0	0	1	49	Marginal	Enumerator 1
NC2025-1060	Valid Samples	2025-08-06	Nanchang East Railway Station	Male	25–34years	Bachelor's degree	Visitors from Other Cities in Jiangxi Province	High-Speed Rail / Train	Traveling Alone	1	1 Day	Neutral	Yes	0	0	1	0	0	1	0	0	0	1	0	1	1	0	0	0	1	0	0	0	0	0	74	Very good	Enumerator 1
NC2025-1061	Valid Samples	2025-08-25	Nanchang East Railway Station	Female	45–59years	Bachelor's degree	Visitors from Other Provinces in China	Private Car	Traveling with Friends	0	2–3 Days	Neutral	No	1	1	0	0	0	0	0	0	0	0	1	1	0	0	0	0	0	0	0	0	0	1	51	Acceptable	Enumerator 1
NC2025-1062	Valid Samples	2025-07-22	Nanchang East Railway Station	Female	18–24years	Associate degree	Visitors from Other Provinces in China	High-Speed Rail / Train	Traveling with Family/Children	0	2–3 Days	Not Concerned at All	No	0	0	0	1	0	1	1	0	0	1	1	1	0	0	0	0	0	0	0	0	0	1	85	Excellent	Enumerator 4
NC2025-1063	Valid Samples	2025-08-23	Nanchang South Railway Station	Male	25–34years	Bachelor's degree	Visitors from Other Provinces in China	High-Speed Rail / Train	Traveling with Friends	2	2–3 Days	Neutral	No	1	1	0	0	0	0	0	0	0	0	0	0	1	0	0	1	0	0	0	0	0	1	60	Good	Enumerator 2
NC2025-1064	Valid Samples	2025-07-22	Nanchang West Railway Station	Female	45–59years	Bachelor's degree	Visitors from Other Provinces in China	High-Speed Rail / Train	Traveling Alone	0	1 Day	Very Concerned	No	1	0	1	1	0	0	0	0	0	1	1	1	0	1	0	0	0	0	0	0	0	1	56	Acceptable	Enumerator 2
NC2025-1065	Valid Samples	2025-07-27	Nanchang Railway Station	Male	18–24years	Bachelor's degree	Visitors from Other Cities in Jiangxi Province	Private Car	Traveling with Friends	0	2–3 Days	Very Concerned	No	1	0	1	0	1	1	0	0	0	0	1	1	0	1	0	0	0	0	0	0	0	1	84	Excellent	Enumerator 1
NC2025-1066	Valid Samples	2025-07-07	Nanchang South Railway Station	Male	18–24years	Bachelor's degree	Visitors from Other Cities in Jiangxi Province	High-Speed Rail / Train	Traveling with Partner	0	2–3 Days	Very Concerned	Yes	0	1	1	0	1	0	0	0	0	1	0	0	1	0	0	0	1	1	0	1	0	0	55	Acceptable	Enumerator 3
NC2025-1067	Valid Samples	2025-07-28	Nanchang Railway Station	Male	45–59years	Associate degree	Visitors from Other Cities in Jiangxi Province	High-Speed Rail / Train	Traveling with Friends	0	1 Day	Not Concerned at All	Yes	1	0	1	1	0	1	1	0	0	0	0	1	0	1	0	0	1	0	0	0	0	0	80	Excellent	Enumerator 3
NC2025-1068	Valid Samples	2025-07-07	Nanchang South Railway Station	Male	25–34years	Associate degree	Visitors from Other Cities in Jiangxi Province	High-Speed Rail / Train	Traveling with Friends	1	1 Day	Neutral	No	0	0	0	1	1	1	1	0	0	0	0	0	1	0	0	1	0	0	0	0	0	1	71	Very good	Enumerator 3
NC2025-1069	Valid Samples	2025-07-07	Nanchang South Railway Station	Male	25–34years	Associate degree	Visitors from Other Cities in Jiangxi Province	High-Speed Rail / Train	Traveling with Partner	0	1 Day	Neutral	No	1	0	1	0	0	0	0	0	0	1	0	0	0	1	0	1	0	0	0	0	0	1	52	Acceptable	Enumerator 4
NC2025-1070	Valid Samples	2025-08-03	Nanchang East Railway Station	Male	35–44years	Master's degree or above	Visitors from Other Provinces in China	High-Speed Rail / Train	Traveling with Friends	1	4–7 Days	Slightly Concerned	No	1	1	1	1	0	1	0	0	0	1	0	0	1	0	0	0	0	0	0	0	0	1	64	Good	Enumerator 1
NC2025-1071	Valid Samples	2025-08-12	Nanchang Changbei International Airport	Female	35–44years	Bachelor's degree	Visitors from Other Provinces in China	Airplane	Traveling Alone	0	1 Day	Slightly Concerned	No	1	1	1	0	1	1	1	0	0	1	1	1	0	0	0	1	0	0	0	0	0	1	79	Very good	Enumerator 2
NC2025-1072	Valid Samples	2025-07-25	Nanchang West Railway Station	Male	25–34years	High school or below	Visitors from Other Cities in Jiangxi Province	Private Car	Traveling with Family/Children	1	More than 7 Days	Very Concerned	No	1	1	0	1	0	1	0	0	0	1	1	0	0	1	0	0	0	0	0	0	0	1	54	Acceptable	Enumerator 2
NC2025-1073	Valid Samples	2025-07-11	Nanchang Changbei International Airport	Male	18–24years	Bachelor's degree	Local Visitors from Nanchang	Private Car	Traveling with Partner	2	1 Day	Neutral	Yes	0	0	1	0	0	0	0	0	0	1	1	0	0	0	0	0	0	0	1	0	0	0	50	Acceptable	Enumerator 1
NC2025-1074	Valid Samples	2025-08-08	Nanchang South Railway Station	Male	35–44years	Master's degree or above	Visitors from Other Cities in Jiangxi Province	High-Speed Rail / Train	Traveling with Family/Children	0	1 Day	Neutral	Yes	0	1	1	0	1	1	0	0	0	1	0	0	1	0	0	0	1	0	0	0	0	0	93	Ideal	Enumerator 3
NC2025-1075	Valid Samples	2025-08-09	Nanchang West Railway Station	Male	35–44years	Bachelor's degree	Visitors from Other Provinces in China	High-Speed Rail / Train	Traveling with Partner	0	1 Day	Moderately Concerned	Yes	0	1	0	0	0	0	1	0	0	0	0	1	0	0	0	0	0	1	0	1	0	0	78	Very good	Enumerator 3
NC2025-1076	Valid Samples	2025-08-15	Nanchang East Railway Station	Male	18–24years	Associate degree	Visitors from Other Cities in Jiangxi Province	High-Speed Rail / Train	Traveling with Friends	1	2–3 Days	Neutral	Yes	1	0	1	0	0	0	0	0	0	1	0	1	0	1	0	0	0	1	0	0	0	0	71	Very good	Enumerator 1
NC2025-1077	Valid Samples	2025-07-16	Nanchang West Railway Station	Male	25–34years	Bachelor's degree	Local Visitors from Nanchang	High-Speed Rail / Train	Group Tour	0	2–3 Days	Neutral	No	1	1	1	0	0	0	0	0	0	1	1	1	0	0	0	0	0	0	0	0	0	1	70	Very good	Enumerator 4
NC2025-1078	Valid Samples	2025-07-01	Nanchang West Railway Station	Male	25–34years	Bachelor's degree	Visitors from Other Provinces in China	Long-Distance Bus	Traveling with Family/Children	0	2–3 Days	Moderately Concerned	Yes	1	0	1	1	1	0	0	0	0	1	0	0	0	0	0	0	0	0	0	0	0	0	63	Good	Enumerator 4
NC2025-1079	Valid Samples	2025-08-24	Nanchang East Railway Station	Female	35–44years	Master's degree or above	Visitors from Other Provinces in China	High-Speed Rail / Train	Traveling Alone	1	4–7 Days	Neutral	No	1	0	0	0	0	1	1	0	0	1	1	1	1	1	0	0	0	0	0	0	0	1	46	Marginal	Enumerator 1
NC2025-1080	Valid Samples	2025-08-26	Nanchang West Railway Station	Male	25–34years	Master's degree or above	Visitors from Other Provinces in China	Long-Distance Bus	Traveling with Family/Children	0	2–3 Days	Neutral	Yes	1	1	0	0	0	0	0	0	0	1	0	1	1	0	0	0	1	0	0	0	0	0	85	Excellent	Enumerator 4
NC2025-1081	Valid Samples	2025-08-10	Nanchang Railway Station	Male	18–24years	Master's degree or above	Visitors from Other Provinces in China	Private Car	Traveling with Friends	0	1 Day	Neutral	Yes	1	1	1	0	1	0	0	0	0	0	0	0	1	0	0	1	0	0	0	0	0	0	69	Good	Enumerator 2
NC2025-1082	Valid Samples	2025-08-09	Nanchang Railway Station	Male	25–34years	Bachelor's degree	Visitors from Other Provinces in China	Local Public Transportation	Traveling with Family/Children	0	2–3 Days	Neutral	Yes	1	1	1	1	1	1	0	0	0	1	1	1	1	1	0	0	1	0	0	0	0	0	69	Good	Enumerator 2
NC2025-1083	Valid Samples	2025-07-30	Nanchang West Railway Station	Female	25–34years	Bachelor's degree	Visitors from Other Cities in Jiangxi Province	Long-Distance Bus	Traveling with Friends	0	Less than Half a Day	Moderately Concerned	Yes	1	1	1	1	0	1	0	0	0	1	1	0	0	0	0	0	0	0	0	0	1	0	67	Good	Enumerator 3
NC2025-1084	Valid Samples	2025-07-04	Nanchang Railway Station	Female	18–24years	Bachelor's degree	Visitors from Other Provinces in China	High-Speed Rail / Train	Traveling with Family/Children	0	2–3 Days	Very Concerned	Yes	1	0	1	1	0	0	0	0	0	0	1	0	0	0	0	1	0	0	0	0	1	0	51	Acceptable	Enumerator 4
NC2025-1085	Valid Samples	2025-08-21	Nanchang Railway Station	Female	25–34years	Bachelor's degree	Visitors from Other Cities in Jiangxi Province	Long-Distance Bus	Traveling with Partner	0	2–3 Days	Neutral	Yes	0	1	1	0	0	0	0	0	0	0	1	0	0	0	1	0	0	0	0	0	0	0	84	Excellent	Enumerator 2
NC2025-1086	Valid Samples	2025-07-17	Nanchang Railway Station	Female	18–24years	Master's degree or above	Visitors from Other Cities in Jiangxi Province	High-Speed Rail / Train	Traveling with Family/Children	0	2–3 Days	Moderately Concerned	Yes	0	0	1	1	0	1	0	0	0	0	0	0	0	0	0	0	0	0	0	0	0	0	88	Excellent	Enumerator 3
NC2025-1087	Valid Samples	2025-07-03	Nanchang South Railway Station	Female	25–34years	Bachelor's degree	Visitors from Other Cities in Jiangxi Province	High-Speed Rail / Train	Traveling with Partner	0	2–3 Days	Slightly Concerned	Yes	0	0	1	0	0	1	0	0	0	0	0	1	1	0	0	0	1	0	0	1	1	0	53	Acceptable	Enumerator 1
NC2025-1088	Valid Samples	2025-07-19	Nanchang Railway Station	Male	35–44years	Associate degree	Visitors from Other Provinces in China	High-Speed Rail / Train	Traveling with Family/Children	0	2–3 Days	Moderately Concerned	No	1	1	1	1	0	1	0	0	0	1	0	1	0	0	0	0	0	0	0	0	0	1	77	Very good	Enumerator 1
NC2025-1089	Valid Samples	2025-08-10	Nanchang Railway Station	Male	25–34years	Associate degree	Visitors from Other Cities in Jiangxi Province	Private Car	Traveling with Partner	1	4–7 Days	Moderately Concerned	No	1	0	1	1	0	0	0	0	0	1	1	1	1	0	0	0	0	0	0	0	0	1	51	Acceptable	Enumerator 2
NC2025-1090	Valid Samples	2025-08-30	Nanchang Changbei International Airport	Male	18–24years	Bachelor's degree	Visitors from Other Cities in Jiangxi Province	Airplane	Traveling Alone	0	Less than Half a Day	Very Concerned	Yes	0	1	1	0	0	0	0	0	0	0	0	0	0	0	0	0	1	0	0	0	1	0	76	Very good	Enumerator 3
NC2025-1091	Valid Samples	2025-07-24	Nanchang East Railway Station	Male	18–24years	Bachelor's degree	Visitors from Other Provinces in China	Private Car	Traveling with Friends	0	Less than Half a Day	Moderately Concerned	No	1	1	1	1	1	0	1	0	0	0	1	1	1	1	1	1	0	0	0	0	0	1	70	Very good	Enumerator 1
NC2025-1092	Valid Samples	2025-08-26	Nanchang East Railway Station	Male	25–34years	Master's degree or above	Visitors from Other Provinces in China	High-Speed Rail / Train	Traveling with Friends	0	Less than Half a Day	Neutral	Yes	1	0	1	1	0	1	0	0	0	1	1	1	1	0	0	0	1	0	1	0	0	0	70	Very good	Enumerator 4
NC2025-1093	Valid Samples	2025-07-08	Nanchang West Railway Station	Female	18–24years	Associate degree	Visitors from Other Cities in Jiangxi Province	High-Speed Rail / Train	Traveling with Friends	0	2–3 Days	Moderately Concerned	Yes	1	1	0	0	0	0	0	0	0	1	1	1	0	1	0	1	0	0	0	0	0	0	43	Marginal	Enumerator 1
NC2025-1094	Valid Samples	2025-07-09	Nanchang Railway Station	Male	18–24years	Bachelor's degree	Visitors from Other Provinces in China	High-Speed Rail / Train	Traveling with Partner	1	2–3 Days	Neutral	Yes	1	0	0	0	0	1	0	1	0	1	0	0	1	0	0	0	0	0	0	0	0	0	71	Very good	Enumerator 1
NC2025-1095	Valid Samples	2025-07-18	Nanchang Changbei International Airport	Male	35–44years	Bachelor's degree	Visitors from Other Cities in Jiangxi Province	Airplane	Traveling with Family/Children	1	1 Day	Very Concerned	No	1	0	0	0	0	0	0	0	0	1	1	1	1	0	0	0	0	0	0	0	0	1	62	Good	Enumerator 4
NC2025-1096	Valid Samples	2025-08-27	Nanchang South Railway Station	Male	18–24years	Master's degree or above	Visitors from Other Provinces in China	High-Speed Rail / Train	Traveling with Family/Children	0	4–7 Days	Neutral	Yes	0	0	0	1	0	0	0	0	0	1	1	1	1	0	1	0	0	0	0	0	0	0	71	Very good	Enumerator 1
NC2025-1097	Valid Samples	2025-07-11	Nanchang Changbei International Airport	Female	18–24years	Bachelor's degree	Visitors from Other Cities in Jiangxi Province	Airplane	Group Tour	0	1 Day	Very Concerned	Yes	1	1	1	0	0	1	0	1	0	1	1	0	0	0	0	0	0	1	0	0	0	0	74	Very good	Enumerator 3
NC2025-1098	Valid Samples	2025-08-25	Nanchang Changbei International Airport	Female	35–44years	Master's degree or above	Visitors from Other Cities in Jiangxi Province	Airplane	Traveling with Family/Children	0	1 Day	Moderately Concerned	No	0	0	1	0	0	0	0	0	0	1	0	0	1	0	0	0	0	0	0	0	0	1	55	Acceptable	Enumerator 3
NC2025-1099	Valid Samples	2025-08-04	Nanchang Railway Station	Female	18–24years	Bachelor's degree	Visitors from Other Cities in Jiangxi Province	High-Speed Rail / Train	Traveling Alone	0	1 Day	Moderately Concerned	No	1	1	1	1	0	1	0	0	0	1	1	1	0	0	0	0	0	0	0	0	0	1	84	Excellent	Enumerator 2
NC2025-1100	Valid Samples	2025-08-15	Nanchang East Railway Station	Female	18–24years	High school or below	Visitors from Other Provinces in China	High-Speed Rail / Train	Group Tour	0	2–3 Days	Very Concerned	No	1	1	1	0	0	1	1	0	0	0	1	0	0	0	0	1	0	0	0	0	0	1	76	Very good	Enumerator 4
NC2025-1101	Valid Samples	2025-07-16	Nanchang East Railway Station	Female	35–44years	Bachelor's degree	Visitors from Other Cities in Jiangxi Province	High-Speed Rail / Train	Traveling with Friends	2	1 Day	Very Concerned	No	1	0	1	0	1	0	0	0	0	1	1	1	0	0	1	0	0	0	0	0	0	1	49	Marginal	Enumerator 4
NC2025-1102	Valid Samples	2025-07-18	Nanchang South Railway Station	Female	35–44years	Bachelor's degree	Visitors from Other Provinces in China	High-Speed Rail / Train	Traveling with Family/Children	1	2–3 Days	Very Concerned	Yes	1	0	0	0	0	0	0	0	0	1	0	0	1	0	0	0	0	0	0	0	0	0	59	Acceptable	Enumerator 2
NC2025-1103	Valid Samples	2025-07-31	Nanchang Changbei International Airport	Female	25–34years	Bachelor's degree	Visitors from Other Provinces in China	Airplane	Traveling Alone	0	1 Day	Neutral	Yes	0	0	0	0	0	0	0	0	0	1	1	0	0	0	0	0	1	1	0	1	1	0	78	Very good	Enumerator 2
NC2025-1105	Valid Samples	2025-07-16	Nanchang East Railway Station	Male	45–59years	Associate degree	Visitors from Other Cities in Jiangxi Province	High-Speed Rail / Train	Traveling with Friends	0	4–7 Days	Moderately Concerned	No	1	1	0	1	0	1	1	0	0	1	1	0	0	0	0	0	0	0	0	0	0	1	66	Good	Enumerator 1
NC2025-1106	Valid Samples	2025-07-01	Nanchang Changbei International Airport	Male	25–34years	Bachelor's degree	Visitors from Other Cities in Jiangxi Province	Airplane	Traveling Alone	0	2–3 Days	Very Concerned	Yes	0	0	1	1	0	0	0	0	0	1	0	1	1	1	1	0	0	0	0	0	0	0	86	Excellent	Enumerator 4
NC2025-1107	Valid Samples	2025-07-30	Nanchang Changbei International Airport	Female	25–34years	Bachelor's degree	Visitors from Other Cities in Jiangxi Province	Airplane	Traveling with Family/Children	0	1 Day	Moderately Concerned	No	1	1	1	0	0	1	1	0	0	0	0	0	0	0	0	0	0	0	0	0	0	1	80	Excellent	Enumerator 1
NC2025-1108	Valid Samples	2025-08-21	Nanchang South Railway Station	Male	45–59years	Bachelor's degree	Visitors from Other Cities in Jiangxi Province	High-Speed Rail / Train	Group Tour	0	Less than Half a Day	Very Concerned	Yes	1	0	1	0	1	0	0	0	0	0	0	0	0	0	0	1	0	0	0	0	0	0	62	Good	Enumerator 1
NC2025-1109	Valid Samples	2025-08-04	Nanchang Railway Station	Male	18–24years	Bachelor's degree	Visitors from Other Cities in Jiangxi Province	High-Speed Rail / Train	Traveling with Friends	1	4–7 Days	Neutral	No	1	0	0	0	0	0	0	0	0	1	0	0	1	1	0	0	0	0	0	0	0	1	64	Good	Enumerator 1
NC2025-1110	Valid Samples	2025-08-13	Nanchang Changbei International Airport	Female	18–24years	Bachelor's degree	Visitors from Other Provinces in China	Private Car	Group Tour	0	2–3 Days	Very Concerned	No	1	0	1	0	0	0	1	0	0	1	1	0	0	0	0	0	0	0	0	0	0	1	44	Marginal	Enumerator 1
NC2025-1111	Valid Samples	2025-07-06	Nanchang West Railway Station	Female	18–24years	High school or below	Visitors from Other Provinces in China	High-Speed Rail / Train	Traveling with Friends	0	1 Day	Moderately Concerned	No	0	1	0	1	1	0	0	0	0	1	0	1	0	0	0	0	0	0	0	0	0	1	59	Acceptable	Enumerator 1
NC2025-1112	Valid Samples	2025-07-20	Nanchang West Railway Station	Male	45–59years	Master's degree or above	Local Visitors from Nanchang	High-Speed Rail / Train	Traveling with Partner	0	2–3 Days	Very Concerned	Yes	1	1	1	1	0	1	0	0	0	1	1	1	1	0	0	0	1	0	0	0	0	0	69	Good	Enumerator 1
NC2025-1113	Valid Samples	2025-08-15	Nanchang East Railway Station	Female	35–44years	Bachelor's degree	Visitors from Other Provinces in China	Private Car	Traveling with Friends	0	1 Day	Moderately Concerned	No	1	1	1	1	0	1	0	0	0	0	1	1	0	0	0	0	0	0	0	0	0	1	73	Very good	Enumerator 2
NC2025-1114	Valid Samples	2025-08-20	Nanchang West Railway Station	Female	18–24years	Bachelor's degree	Visitors from Other Cities in Jiangxi Province	Private Car	Traveling with Family/Children	0	Less than Half a Day	Moderately Concerned	No	1	0	1	0	0	0	0	0	0	0	0	1	0	0	0	0	0	0	0	0	0	1	68	Good	Enumerator 1
NC2025-1115	Valid Samples	2025-08-02	Nanchang Changbei International Airport	Female	25–34years	Master's degree or above	Visitors from Other Provinces in China	Airplane	Traveling with Partner	0	2–3 Days	Slightly Concerned	Yes	0	0	0	0	0	0	0	0	0	1	1	1	1	0	0	1	0	1	0	0	0	0	51	Acceptable	Enumerator 1
NC2025-1116	Valid Samples	2025-08-22	Nanchang Railway Station	Female	18–24years	Bachelor's degree	Local Visitors from Nanchang	High-Speed Rail / Train	Traveling with Friends	0	More than 7 Days	Neutral	Yes	1	1	1	0	0	0	0	0	0	0	0	0	0	1	1	0	0	0	0	0	1	0	68	Good	Enumerator 2
NC2025-1117	Valid Samples	2025-07-04	Nanchang South Railway Station	Female	45–59years	Bachelor's degree	Visitors from Other Cities in Jiangxi Province	High-Speed Rail / Train	Traveling Alone	0	2–3 Days	Moderately Concerned	No	1	0	0	1	0	1	0	0	0	0	0	0	0	0	0	0	0	0	0	0	0	1	71	Very good	Enumerator 1
NC2025-1118	Valid Samples	2025-07-31	Nanchang West Railway Station	Male	≥60years	Master's degree or above	Visitors from Other Provinces in China	High-Speed Rail / Train	Traveling Alone	0	1 Day	Slightly Concerned	No	1	0	1	0	0	0	0	1	0	1	0	0	0	1	0	0	0	0	0	0	0	1	78	Very good	Enumerator 4
NC2025-1119	Valid Samples	2025-07-20	Nanchang West Railway Station	Female	25–34years	Bachelor's degree	Visitors from Other Provinces in China	High-Speed Rail / Train	Traveling Alone	0	Less than Half a Day	Neutral	Yes	1	0	0	0	1	0	1	0	0	1	1	0	0	0	0	0	0	0	0	1	0	0	90	Ideal	Enumerator 3
NC2025-1120	Valid Samples	2025-07-29	Nanchang South Railway Station	Female	35–44years	Bachelor's degree	Visitors from Other Cities in Jiangxi Province	High-Speed Rail / Train	Traveling with Friends	2	4–7 Days	Very Concerned	Yes	1	1	0	0	0	0	0	0	0	0	0	1	0	0	0	0	0	0	0	0	0	0	40	Marginal	Enumerator 1
NC2025-1121	Valid Samples	2025-08-07	Nanchang Changbei International Airport	Female	25–34years	Bachelor's degree	Visitors from Hong Kong, Macao, Taiwan, and Overseas	Airplane	Group Tour	1	1 Day	Very Concerned	No	0	0	1	0	1	0	0	1	0	1	0	1	1	0	1	1	0	0	0	0	0	1	74	Very good	Enumerator 2
NC2025-1122	Valid Samples	2025-08-06	Nanchang West Railway Station	Female	25–34years	Bachelor's degree	Visitors from Other Cities in Jiangxi Province	High-Speed Rail / Train	Traveling with Partner	0	2–3 Days	Very Concerned	No	0	1	1	1	1	0	0	0	0	1	0	1	0	0	0	0	0	0	0	0	0	1	60	Good	Enumerator 2
NC2025-1123	Valid Samples	2025-07-22	Nanchang East Railway Station	Male	18–24years	Bachelor's degree	Local Visitors from Nanchang	High-Speed Rail / Train	Traveling with Friends	0	Less than Half a Day	Slightly Concerned	No	0	1	0	1	1	1	0	0	0	1	1	0	0	0	0	0	0	0	0	0	0	1	78	Very good	Enumerator 2
NC2025-1124	Valid Samples	2025-07-27	Nanchang Changbei International Airport	Female	18–24years	Bachelor's degree	Visitors from Other Cities in Jiangxi Province	Private Car	Traveling with Family/Children	0	2–3 Days	Very Concerned	No	1	0	1	0	0	0	0	0	0	1	0	0	1	0	0	0	0	0	0	0	0	1	64	Good	Enumerator 4
NC2025-1125	Valid Samples	2025-07-30	Nanchang Changbei International Airport	Male	45–59years	Master's degree or above	Local Visitors from Nanchang	Airplane	Traveling with Partner	1	2–3 Days	Moderately Concerned	No	1	0	0	0	0	1	0	0	0	1	0	0	1	0	0	0	0	0	0	0	0	1	85	Excellent	Enumerator 1
NC2025-1126	Valid Samples	2025-07-11	Nanchang Changbei International Airport	Male	25–34years	Associate degree	Visitors from Other Provinces in China	Airplane	Traveling with Friends	0	1 Day	Neutral	Yes	0	0	1	1	0	1	1	0	0	0	0	1	1	0	1	0	0	1	0	0	0	0	83	Excellent	Enumerator 2
NC2025-1127	Valid Samples	2025-08-23	Nanchang West Railway Station	Male	18–24years	Associate degree	Visitors from Other Provinces in China	High-Speed Rail / Train	Traveling with Family/Children	0	2–3 Days	Moderately Concerned	No	1	0	1	0	0	0	0	0	0	0	1	0	0	1	0	0	0	0	0	0	0	1	86	Excellent	Enumerator 4
NC2025-1129	Valid Samples	2025-07-23	Nanchang Railway Station	Male	25–34years	Master's degree or above	Visitors from Other Provinces in China	High-Speed Rail / Train	Traveling with Friends	0	2–3 Days	Neutral	No	1	0	0	0	0	0	0	0	0	1	1	1	0	0	0	0	0	0	0	0	0	1	88	Excellent	Enumerator 4
NC2025-1130	Valid Samples	2025-07-04	Nanchang Railway Station	Female	35–44years	Bachelor's degree	Visitors from Other Provinces in China	Long-Distance Bus	Traveling with Friends	0	2–3 Days	Neutral	Yes	0	1	0	1	0	1	0	0	0	1	0	0	1	0	0	1	0	1	0	0	0	0	53	Acceptable	Enumerator 2
NC2025-1132	Valid Samples	2025-08-09	Nanchang Changbei International Airport	Female	25–34years	High school or below	Local Visitors from Nanchang	Private Car	Traveling with Friends	0	2–3 Days	Very Concerned	Yes	1	0	1	0	1	0	1	0	0	0	0	1	0	1	0	0	0	0	1	0	0	0	69	Good	Enumerator 1
NC2025-1133	Valid Samples	2025-08-17	Nanchang South Railway Station	Female	25–34years	Master's degree or above	Visitors from Other Cities in Jiangxi Province	High-Speed Rail / Train	Traveling with Family/Children	0	Less than Half a Day	Moderately Concerned	No	0	0	0	0	1	0	0	0	0	0	0	1	1	0	0	0	0	0	0	0	0	1	71	Very good	Enumerator 3
NC2025-1134	Valid Samples	2025-08-29	Nanchang Changbei International Airport	Male	18–24years	Master's degree or above	Visitors from Other Provinces in China	Airplane	Traveling with Friends	0	1 Day	Very Concerned	No	1	0	1	1	0	0	0	1	0	0	0	1	1	1	1	0	0	0	0	0	0	1	69	Good	Enumerator 1
NC2025-1135	Valid Samples	2025-08-12	Nanchang West Railway Station	Female	25–34years	Master's degree or above	Visitors from Other Provinces in China	Private Car	Traveling with Partner	1	1 Day	Very Concerned	No	1	1	0	1	0	0	1	1	0	0	1	0	0	0	0	0	0	0	0	0	0	1	46	Marginal	Enumerator 4
NC2025-1137	Valid Samples	2025-07-16	Nanchang East Railway Station	Male	25–34years	Master's degree or above	Visitors from Hong Kong, Macao, Taiwan, and Overseas	High-Speed Rail / Train	Traveling with Partner	0	1 Day	Moderately Concerned	Yes	1	0	1	0	0	0	0	1	0	1	0	1	0	0	0	0	1	0	0	0	0	0	84	Excellent	Enumerator 3
NC2025-1138	Valid Samples	2025-07-06	Nanchang Changbei International Airport	Male	45–59years	Bachelor's degree	Visitors from Other Cities in Jiangxi Province	Airplane	Traveling with Friends	0	Less than Half a Day	Neutral	No	1	1	0	1	1	1	1	0	0	1	0	0	0	0	0	1	0	0	0	0	0	1	76	Very good	Enumerator 2
NC2025-1139	Valid Samples	2025-07-12	Nanchang Changbei International Airport	Male	25–34years	Associate degree	Visitors from Other Provinces in China	Airplane	Traveling with Family/Children	0	2–3 Days	Slightly Concerned	Yes	1	1	1	0	0	1	0	0	0	0	0	0	1	1	0	0	0	1	1	0	1	0	62	Good	Enumerator 2
NC2025-1140	Valid Samples	2025-07-06	Nanchang West Railway Station	Female	25–34years	Bachelor's degree	Visitors from Other Provinces in China	High-Speed Rail / Train	Traveling with Family/Children	0	1 Day	Slightly Concerned	Yes	0	0	1	1	0	0	0	0	0	0	0	1	0	0	0	0	1	1	0	0	0	0	47	Marginal	Enumerator 1
NC2025-1141	Valid Samples	2025-07-18	Nanchang West Railway Station	Male	18–24years	Bachelor's degree	Visitors from Other Cities in Jiangxi Province	High-Speed Rail / Train	Traveling with Family/Children	0	2–3 Days	Neutral	No	1	1	1	0	0	1	0	0	0	1	0	0	0	0	0	0	0	0	0	0	0	1	76	Very good	Enumerator 1
NC2025-1142	Valid Samples	2025-07-17	Nanchang Changbei International Airport	Male	45–59years	Bachelor's degree	Visitors from Other Provinces in China	Private Car	Group Tour	0	2–3 Days	Moderately Concerned	No	1	0	1	1	0	1	0	0	0	1	0	1	0	0	0	0	0	0	0	0	0	1	90	Ideal	Enumerator 3
NC2025-1143	Valid Samples	2025-08-26	Nanchang Changbei International Airport	Male	≥60years	Bachelor's degree	Visitors from Other Cities in Jiangxi Province	Airplane	Traveling with Friends	0	2–3 Days	Moderately Concerned	Yes	0	1	1	0	0	0	0	0	0	1	0	0	1	0	0	1	0	1	0	0	0	0	54	Acceptable	Enumerator 3
NC2025-1144	Valid Samples	2025-06-30	Nanchang South Railway Station	Female	25–34years	Bachelor's degree	Visitors from Other Cities in Jiangxi Province	High-Speed Rail / Train	Traveling with Family/Children	0	2–3 Days	Neutral	Yes	1	1	1	1	0	0	0	0	1	1	1	1	1	0	0	0	0	0	0	0	0	0	61	Good	Enumerator 4
NC2025-1145	Valid Samples	2025-08-29	Nanchang Railway Station	Female	25–34years	Associate degree	Visitors from Other Provinces in China	High-Speed Rail / Train	Traveling with Partner	0	Less than Half a Day	Moderately Concerned	No	1	1	1	0	1	1	0	0	0	1	1	1	1	1	0	0	0	0	0	0	0	1	83	Excellent	Enumerator 2
NC2025-1146	Valid Samples	2025-08-26	Nanchang West Railway Station	Female	18–24years	Bachelor's degree	Visitors from Other Cities in Jiangxi Province	Private Car	Traveling with Friends	0	2–3 Days	Neutral	No	1	1	1	1	0	0	0	0	0	1	0	0	0	0	0	1	0	0	0	0	0	1	72	Very good	Enumerator 1
NC2025-1147	Valid Samples	2025-07-17	Nanchang East Railway Station	Male	≥60years	Associate degree	Local Visitors from Nanchang	High-Speed Rail / Train	Traveling with Family/Children	0	Less than Half a Day	Not Concerned at All	No	0	0	1	0	0	0	0	0	0	0	0	1	0	0	1	0	0	0	0	0	0	1	54	Acceptable	Enumerator 1
NC2025-1148	Valid Samples	2025-08-30	Nanchang West Railway Station	Female	18–24years	Bachelor's degree	Visitors from Other Provinces in China	Local Public Transportation	Group Tour	0	1 Day	Very Concerned	No	0	0	0	1	0	0	0	0	0	1	0	0	1	0	0	0	0	0	0	0	0	1	75	Very good	Enumerator 4
NC2025-1149	Valid Samples	2025-08-13	Nanchang West Railway Station	Female	≥60years	Bachelor's degree	Visitors from Other Provinces in China	High-Speed Rail / Train	Traveling with Friends	1	4–7 Days	Very Concerned	Yes	1	0	0	1	1	0	0	0	0	1	0	1	1	0	0	0	0	1	0	1	0	0	71	Very good	Enumerator 1
NC2025-1150	Valid Samples	2025-08-09	Nanchang Railway Station	Female	35–44years	Bachelor's degree	Visitors from Other Cities in Jiangxi Province	High-Speed Rail / Train	Group Tour	0	2–3 Days	Moderately Concerned	Yes	1	0	0	0	1	1	0	0	0	1	1	1	0	0	0	0	1	0	0	1	1	0	81	Excellent	Enumerator 1
NC2025-1151	Valid Samples	2025-08-05	Nanchang South Railway Station	Male	35–44years	Bachelor's degree	Visitors from Other Provinces in China	High-Speed Rail / Train	Traveling with Partner	0	2–3 Days	Moderately Concerned	No	0	0	1	1	1	1	0	0	0	1	1	1	1	0	0	0	0	0	0	0	0	1	52	Acceptable	Enumerator 4
NC2025-1152	Valid Samples	2025-07-23	Nanchang West Railway Station	Female	25–34years	Associate degree	Visitors from Other Provinces in China	High-Speed Rail / Train	Traveling with Family/Children	0	2–3 Days	Moderately Concerned	Yes	0	1	0	0	0	0	0	0	0	1	1	0	1	1	0	0	0	1	1	0	0	0	76	Very good	Enumerator 3
NC2025-1153	Valid Samples	2025-07-17	Nanchang West Railway Station	Male	25–34years	Bachelor's degree	Visitors from Other Cities in Jiangxi Province	Private Car	Traveling with Friends	0	2–3 Days	Neutral	No	1	0	1	0	0	1	0	0	0	1	1	0	1	1	0	0	0	0	0	0	0	1	61	Good	Enumerator 1
NC2025-1154	Valid Samples	2025-08-13	Nanchang Railway Station	Female	25–34years	Bachelor's degree	Visitors from Other Cities in Jiangxi Province	Private Car	Traveling with Friends	0	4–7 Days	Moderately Concerned	Yes	1	0	0	0	0	0	0	0	0	0	0	0	0	0	0	1	1	0	0	0	0	0	60	Good	Enumerator 4
NC2025-1155	Valid Samples	2025-07-16	Nanchang Changbei International Airport	Female	18–24years	Bachelor's degree	Visitors from Other Provinces in China	Airplane	Traveling with Friends	1	2–3 Days	Slightly Concerned	No	0	0	1	0	1	0	1	0	0	1	1	1	0	0	0	0	0	0	0	0	0	1	75	Very good	Enumerator 2
NC2025-1156	Valid Samples	2025-08-07	Nanchang Changbei International Airport	Female	25–34years	High school or below	Visitors from Other Cities in Jiangxi Province	Private Car	Traveling Alone	0	2–3 Days	Moderately Concerned	Yes	0	1	1	1	0	0	0	0	0	0	1	0	1	0	0	0	0	0	0	0	0	0	72	Very good	Enumerator 3
NC2025-1157	Valid Samples	2025-07-30	Nanchang East Railway Station	Male	45–59years	Bachelor's degree	Visitors from Other Provinces in China	Private Car	Traveling with Partner	1	4–7 Days	Moderately Concerned	No	1	0	0	0	0	1	0	1	0	1	0	1	0	0	0	0	0	0	0	0	0	1	74	Very good	Enumerator 1
NC2025-1158	Valid Samples	2025-08-14	Nanchang Railway Station	Male	18–24years	Master's degree or above	Visitors from Other Provinces in China	Long-Distance Bus	Group Tour	0	2–3 Days	Neutral	Yes	1	0	0	0	0	0	0	0	0	1	0	0	0	0	0	0	0	0	0	1	0	0	49	Marginal	Enumerator 3
NC2025-1159	Valid Samples	2025-08-04	Nanchang Changbei International Airport	Male	18–24years	Bachelor's degree	Visitors from Other Provinces in China	Private Car	Traveling with Partner	1	Less than Half a Day	Not Concerned at All	Yes	1	0	1	1	0	1	1	0	0	1	1	0	0	0	0	0	1	0	0	1	0	0	77	Very good	Enumerator 2
NC2025-1160	Valid Samples	2025-07-03	Nanchang South Railway Station	Male	25–34years	Bachelor's degree	Visitors from Other Provinces in China	High-Speed Rail / Train	Traveling with Family/Children	0	2–3 Days	Neutral	No	1	0	1	1	1	0	1	0	0	1	0	1	0	0	1	0	0	0	0	0	0	1	54	Acceptable	Enumerator 4
NC2025-1161	Valid Samples	2025-08-30	Nanchang Railway Station	Female	45–59years	High school or below	Visitors from Other Provinces in China	High-Speed Rail / Train	Traveling Alone	0	2–3 Days	Neutral	Yes	1	0	0	0	0	0	0	0	0	1	0	1	0	0	0	0	1	0	0	1	0	0	68	Good	Enumerator 1
NC2025-1162	Valid Samples	2025-08-05	Nanchang South Railway Station	Female	35–44years	Associate degree	Local Visitors from Nanchang	High-Speed Rail / Train	Group Tour	0	1 Day	Moderately Concerned	Yes	1	1	1	0	0	0	0	0	0	0	0	1	1	0	0	0	0	1	1	0	0	0	77	Very good	Enumerator 4
NC2025-1163	Valid Samples	2025-08-21	Nanchang East Railway Station	Female	18–24years	High school or below	Visitors from Other Cities in Jiangxi Province	Private Car	Traveling with Family/Children	2	1 Day	Very Concerned	Yes	1	1	0	0	1	1	0	0	0	0	0	0	0	0	0	0	1	0	0	0	0	0	67	Good	Enumerator 2
NC2025-1164	Valid Samples	2025-07-18	Nanchang Railway Station	Male	18–24years	High school or below	Visitors from Other Provinces in China	High-Speed Rail / Train	Traveling with Family/Children	0	1 Day	Very Concerned	Yes	1	1	0	0	0	1	0	0	0	1	0	1	0	0	0	1	0	0	0	0	0	0	58	Acceptable	Enumerator 1
NC2025-1165	Valid Samples	2025-07-25	Nanchang Changbei International Airport	Female	25–34years	Bachelor's degree	Local Visitors from Nanchang	Airplane	Traveling with Partner	2	1 Day	Neutral	No	1	1	1	0	1	1	1	0	0	1	0	0	0	1	0	1	0	0	0	0	0	1	58	Acceptable	Enumerator 3
NC2025-1166	Valid Samples	2025-07-28	Nanchang Railway Station	Female	35–44years	Bachelor's degree	Visitors from Other Provinces in China	Private Car	Traveling with Friends	0	2–3 Days	Very Concerned	Yes	1	0	0	0	1	1	0	0	0	0	0	1	0	0	0	0	1	0	0	0	0	0	63	Good	Enumerator 4
NC2025-1167	Valid Samples	2025-08-17	Nanchang Railway Station	Female	18–24years	Associate degree	Visitors from Other Provinces in China	High-Speed Rail / Train	Group Tour	0	1 Day	Moderately Concerned	No	1	0	0	0	0	0	0	0	0	1	0	1	1	0	0	0	0	0	0	0	0	1	63	Good	Enumerator 3
NC2025-1168	Valid Samples	2025-08-07	Nanchang Changbei International Airport	Male	35–44years	Master's degree or above	Visitors from Other Provinces in China	Other	Traveling with Family/Children	0	4–7 Days	Very Concerned	Yes	1	0	1	1	0	1	0	0	0	0	0	1	0	0	0	0	1	0	0	0	0	0	68	Good	Enumerator 3
NC2025-1169	Valid Samples	2025-07-26	Nanchang Railway Station	Male	45–59years	Bachelor's degree	Visitors from Other Provinces in China	Long-Distance Bus	Traveling with Friends	1	2–3 Days	Very Concerned	Yes	1	0	0	0	0	0	1	0	0	1	0	1	0	1	1	0	0	1	0	0	0	0	44	Marginal	Enumerator 3
NC2025-1170	Valid Samples	2025-08-30	Nanchang Railway Station	Male	18–24years	Master's degree or above	Visitors from Other Provinces in China	Long-Distance Bus	Traveling with Family/Children	2	2–3 Days	Neutral	No	1	0	0	1	1	0	0	1	0	1	1	1	0	0	1	0	0	0	0	0	0	1	94	Ideal	Enumerator 1
NC2025-1171	Valid Samples	2025-08-19	Nanchang Railway Station	Male	25–34years	Bachelor's degree	Visitors from Other Cities in Jiangxi Province	Private Car	Group Tour	0	2–3 Days	Very Concerned	No	1	0	1	0	1	0	0	0	0	1	0	1	1	1	0	0	0	0	0	0	0	1	77	Very good	Enumerator 1
NC2025-1172	Valid Samples	2025-07-30	Nanchang South Railway Station	Female	35–44years	Associate degree	Visitors from Other Provinces in China	High-Speed Rail / Train	Group Tour	1	2–3 Days	Moderately Concerned	No	1	0	0	0	0	1	1	0	0	1	0	1	0	0	0	0	0	0	0	0	0	1	46	Marginal	Enumerator 1
NC2025-1173	Valid Samples	2025-08-25	Nanchang East Railway Station	Male	18–24years	Associate degree	Local Visitors from Nanchang	High-Speed Rail / Train	Traveling with Friends	0	1 Day	Neutral	No	0	1	1	0	0	0	1	1	0	1	0	1	1	0	0	0	0	0	0	0	0	1	79	Very good	Enumerator 2
NC2025-1174	Valid Samples	2025-08-24	Nanchang Railway Station	Male	35–44years	Bachelor's degree	Visitors from Other Cities in Jiangxi Province	High-Speed Rail / Train	Traveling with Family/Children	0	4–7 Days	Neutral	Yes	1	0	1	0	0	1	0	0	0	1	0	0	0	1	0	0	1	0	0	0	0	0	89	Excellent	Enumerator 4
NC2025-1175	Valid Samples	2025-06-30	Nanchang East Railway Station	Male	18–24years	High school or below	Visitors from Other Provinces in China	High-Speed Rail / Train	Traveling with Family/Children	0	2–3 Days	Moderately Concerned	No	1	0	1	1	0	0	0	0	0	1	0	0	0	0	0	0	0	0	0	0	0	1	97	Ideal	Enumerator 2
NC2025-1176	Valid Samples	2025-08-13	Nanchang West Railway Station	Female	25–34years	Bachelor's degree	Visitors from Other Provinces in China	Long-Distance Bus	Traveling with Friends	0	2–3 Days	Very Concerned	No	1	0	1	0	1	0	0	0	0	1	0	0	1	0	1	0	0	0	0	0	0	1	67	Good	Enumerator 1
NC2025-1177	Valid Samples	2025-08-29	Nanchang Changbei International Airport	Male	35–44years	Associate degree	Local Visitors from Nanchang	Airplane	Traveling Alone	1	2–3 Days	Neutral	No	1	1	0	0	0	0	0	0	0	1	0	1	0	0	1	0	0	0	0	0	0	1	62	Good	Enumerator 2
NC2025-1178	Valid Samples	2025-08-24	Nanchang East Railway Station	Female	18–24years	Bachelor's degree	Visitors from Other Provinces in China	Private Car	Traveling with Family/Children	0	2–3 Days	Very Concerned	Yes	0	0	0	0	0	1	1	1	0	1	0	1	0	0	1	0	0	0	1	1	0	0	84	Excellent	Enumerator 2
NC2025-1179	Valid Samples	2025-08-21	Nanchang East Railway Station	Male	45–59years	Bachelor's degree	Visitors from Other Provinces in China	Private Car	Traveling with Friends	0	2–3 Days	Moderately Concerned	Yes	0	0	1	0	0	1	0	0	0	0	1	1	1	0	0	0	0	0	0	0	0	0	75	Very good	Enumerator 2
NC2025-1180	Valid Samples	2025-07-10	Nanchang West Railway Station	Male	35–44years	Bachelor's degree	Visitors from Other Provinces in China	Local Public Transportation	Traveling Alone	0	2–3 Days	Slightly Concerned	Yes	0	0	0	1	1	1	0	0	0	1	0	0	0	0	0	1	0	0	0	0	0	0	77	Very good	Enumerator 4
NC2025-1181	Valid Samples	2025-08-04	Nanchang South Railway Station	Female	25–34years	Bachelor's degree	Visitors from Other Provinces in China	High-Speed Rail / Train	Traveling Alone	0	1 Day	Moderately Concerned	No	1	1	0	1	0	0	0	0	0	0	0	1	0	1	0	0	0	0	0	0	0	1	76	Very good	Enumerator 2
NC2025-1182	Valid Samples	2025-08-13	Nanchang East Railway Station	Male	18–24years	Bachelor's degree	Visitors from Other Cities in Jiangxi Province	High-Speed Rail / Train	Traveling with Partner	0	4–7 Days	Moderately Concerned	No	1	0	1	1	0	1	0	0	0	1	1	1	0	0	0	1	0	0	0	0	0	1	48	Marginal	Enumerator 3
NC2025-1183	Valid Samples	2025-08-25	Nanchang Changbei International Airport	Male	18–24years	High school or below	Visitors from Other Provinces in China	Airplane	Traveling with Family/Children	0	4–7 Days	Moderately Concerned	No	0	0	0	0	1	0	0	0	0	0	1	0	1	0	0	0	0	0	0	0	0	1	67	Good	Enumerator 2
NC2025-1184	Valid Samples	2025-08-15	Nanchang East Railway Station	Male	25–34years	Associate degree	Visitors from Other Provinces in China	High-Speed Rail / Train	Traveling with Partner	0	1 Day	Not Concerned at All	No	0	1	0	0	0	0	0	0	0	0	0	0	1	0	0	0	0	0	0	0	0	1	66	Good	Enumerator 4
NC2025-1185	Valid Samples	2025-08-11	Nanchang East Railway Station	Female	18–24years	Master's degree or above	Visitors from Other Provinces in China	High-Speed Rail / Train	Traveling with Family/Children	1	2–3 Days	Very Concerned	No	0	0	1	0	0	0	0	0	0	0	0	0	1	1	0	0	0	0	0	0	0	1	61	Good	Enumerator 4
NC2025-1186	Valid Samples	2025-07-14	Nanchang South Railway Station	Female	45–59years	Master's degree or above	Visitors from Other Cities in Jiangxi Province	High-Speed Rail / Train	Traveling Alone	0	1 Day	Moderately Concerned	No	1	0	1	1	0	1	1	0	0	0	0	1	0	0	1	0	0	0	0	0	0	1	70	Very good	Enumerator 3
NC2025-1187	Valid Samples	2025-08-17	Nanchang West Railway Station	Male	35–44years	Bachelor's degree	Visitors from Other Cities in Jiangxi Province	Private Car	Group Tour	2	1 Day	Neutral	No	1	0	1	0	0	1	0	1	0	1	0	1	1	0	1	0	0	0	0	0	0	1	59	Acceptable	Enumerator 4
NC2025-1188	Valid Samples	2025-07-22	Nanchang West Railway Station	Female	18–24years	Associate degree	Local Visitors from Nanchang	Private Car	Group Tour	0	4–7 Days	Not Concerned at All	No	1	1	0	0	1	0	0	1	0	1	1	0	0	0	0	0	0	0	0	0	0	1	92	Ideal	Enumerator 1
NC2025-1189	Valid Samples	2025-07-22	Nanchang West Railway Station	Male	25–34years	Associate degree	Visitors from Other Cities in Jiangxi Province	Long-Distance Bus	Traveling with Family/Children	0	1 Day	Neutral	No	0	0	0	0	0	1	0	0	0	0	0	1	0	0	0	1	0	0	0	0	0	1	68	Good	Enumerator 1
NC2025-1190	Valid Samples	2025-07-19	Nanchang Changbei International Airport	Female	35–44years	Bachelor's degree	Visitors from Other Provinces in China	Private Car	Traveling with Friends	1	2–3 Days	Very Concerned	Yes	0	0	0	0	0	1	0	0	1	1	1	1	1	0	0	1	1	0	0	0	0	0	63	Good	Enumerator 2
NC2025-1191	Valid Samples	2025-08-29	Nanchang Changbei International Airport	Male	18–24years	Bachelor's degree	Visitors from Other Provinces in China	Airplane	Traveling with Friends	0	1 Day	Neutral	Yes	0	1	0	0	0	0	0	0	0	0	1	1	0	1	0	0	0	0	0	0	0	0	75	Very good	Enumerator 2
NC2025-1192	Valid Samples	2025-07-10	Nanchang Changbei International Airport	Male	18–24years	Associate degree	Local Visitors from Nanchang	Airplane	Traveling Alone	0	2–3 Days	Neutral	Yes	1	0	0	0	0	0	0	0	0	0	1	1	0	0	0	0	1	0	0	0	0	0	54	Acceptable	Enumerator 1
NC2025-1193	Valid Samples	2025-07-12	Nanchang Railway Station	Female	≥60years	Associate degree	Visitors from Other Provinces in China	High-Speed Rail / Train	Traveling with Friends	0	4–7 Days	Very Concerned	No	0	0	0	0	0	1	0	0	0	1	1	0	1	1	0	0	0	0	0	0	0	1	58	Acceptable	Enumerator 3
NC2025-1194	Valid Samples	2025-08-03	Nanchang West Railway Station	Female	25–34years	Associate degree	Visitors from Other Provinces in China	High-Speed Rail / Train	Traveling Alone	0	4–7 Days	Very Concerned	No	0	1	1	0	1	1	0	0	0	1	0	0	1	1	0	0	0	0	0	0	0	1	60	Good	Enumerator 3
NC2025-1195	Valid Samples	2025-07-23	Nanchang Railway Station	Male	25–34years	Associate degree	Visitors from Other Cities in Jiangxi Province	High-Speed Rail / Train	Traveling with Partner	0	1 Day	Slightly Concerned	No	0	0	1	0	0	1	0	0	0	1	1	0	1	0	0	0	0	0	0	0	0	1	53	Acceptable	Enumerator 3
NC2025-1196	Valid Samples	2025-08-13	Nanchang Changbei International Airport	Male	25–34years	Master's degree or above	Visitors from Other Provinces in China	Airplane	Traveling with Friends	0	1 Day	Moderately Concerned	No	0	0	0	0	0	0	1	0	0	1	1	1	1	0	0	0	0	0	0	0	0	1	54	Acceptable	Enumerator 1
NC2025-1197	Valid Samples	2025-08-22	Nanchang West Railway Station	Female	18–24years	Bachelor's degree	Local Visitors from Nanchang	High-Speed Rail / Train	Group Tour	2	2–3 Days	Very Concerned	No	1	0	0	0	0	0	0	0	0	1	0	0	1	0	0	0	0	0	0	0	0	1	73	Very good	Enumerator 2
NC2025-1198	Valid Samples	2025-08-26	Nanchang Railway Station	Male	35–44years	Master's degree or above	Visitors from Other Provinces in China	High-Speed Rail / Train	Traveling with Family/Children	0	2–3 Days	Moderately Concerned	No	1	0	0	0	0	1	0	0	0	1	0	1	1	1	0	0	0	0	0	0	0	1	70	Very good	Enumerator 4
NC2025-1199	Valid Samples	2025-07-09	Nanchang Changbei International Airport	Male	25–34years	Bachelor's degree	Visitors from Other Provinces in China	Airplane	Traveling with Family/Children	0	Less than Half a Day	Neutral	No	1	0	1	0	0	0	0	0	0	1	0	1	0	1	0	0	0	0	0	0	0	1	68	Good	Enumerator 2
NC2025-1200	Valid Samples	2025-07-30	Nanchang West Railway Station	Male	18–24years	Bachelor's degree	Local Visitors from Nanchang	High-Speed Rail / Train	Traveling with Family/Children	0	1 Day	Neutral	Yes	0	0	1	0	0	1	0	0	0	0	1	0	1	0	1	1	1	0	0	0	0	0	63	Good	Enumerator 1
NC2025-1201	Valid Samples	2025-07-26	Nanchang Railway Station	Male	35–44years	High school or below	Visitors from Other Provinces in China	High-Speed Rail / Train	Traveling Alone	0	4–7 Days	Moderately Concerned	Yes	1	1	0	1	0	1	1	0	0	1	0	0	1	0	1	0	0	0	1	0	0	0	68	Good	Enumerator 1
NC2025-1202	Valid Samples	2025-07-10	Nanchang East Railway Station	Male	35–44years	Associate degree	Visitors from Other Provinces in China	High-Speed Rail / Train	Traveling Alone	0	More than 7 Days	Moderately Concerned	Yes	0	1	0	0	1	0	0	0	0	0	0	0	1	0	0	0	0	0	0	1	0	0	77	Very good	Enumerator 3
NC2025-1203	Valid Samples	2025-07-18	Nanchang Changbei International Airport	Female	25–34years	Bachelor's degree	Visitors from Other Cities in Jiangxi Province	Airplane	Traveling with Friends	0	Less than Half a Day	Slightly Concerned	No	1	1	1	0	0	0	0	0	0	1	1	1	0	1	0	0	0	0	0	0	0	1	90	Ideal	Enumerator 3
NC2025-1204	Valid Samples	2025-07-18	Nanchang East Railway Station	Male	25–34years	Associate degree	Visitors from Other Cities in Jiangxi Province	High-Speed Rail / Train	Traveling Alone	0	2–3 Days	Neutral	Yes	1	1	1	0	1	0	0	0	0	0	1	1	1	0	0	0	1	0	0	0	0	0	56	Acceptable	Enumerator 2
NC2025-1205	Valid Samples	2025-07-15	Nanchang Changbei International Airport	Male	18–24years	Associate degree	Visitors from Other Cities in Jiangxi Province	Airplane	Traveling with Family/Children	2	1 Day	Slightly Concerned	No	1	0	0	0	0	0	0	0	0	1	1	0	0	0	0	0	0	0	0	0	0	1	72	Very good	Enumerator 3
NC2025-1206	Valid Samples	2025-07-02	Nanchang Railway Station	Male	35–44years	Bachelor's degree	Local Visitors from Nanchang	Private Car	Traveling with Family/Children	0	2–3 Days	Neutral	Yes	1	1	1	0	1	0	0	0	0	0	0	0	0	0	0	0	1	0	0	1	0	0	80	Excellent	Enumerator 1
NC2025-1207	Valid Samples	2025-07-23	Nanchang West Railway Station	Female	25–34years	Associate degree	Visitors from Hong Kong, Macao, Taiwan, and Overseas	High-Speed Rail / Train	Traveling with Partner	0	2–3 Days	Very Concerned	Yes	1	1	1	1	0	1	0	0	0	0	0	0	1	1	0	1	1	1	0	1	1	0	56	Acceptable	Enumerator 1
NC2025-1209	Valid Samples	2025-08-21	Nanchang West Railway Station	Female	45–59years	High school or below	Visitors from Other Cities in Jiangxi Province	High-Speed Rail / Train	Traveling with Friends	1	1 Day	Neutral	Yes	0	0	1	1	1	1	0	0	0	0	0	0	1	0	0	1	0	0	0	0	1	0	71	Very good	Enumerator 3
NC2025-1210	Valid Samples	2025-07-15	Nanchang East Railway Station	Female	45–59years	Bachelor's degree	Visitors from Other Provinces in China	High-Speed Rail / Train	Traveling with Friends	1	2–3 Days	Very Concerned	No	1	1	1	0	0	1	0	0	0	0	0	1	0	0	0	0	0	0	0	0	0	1	57	Acceptable	Enumerator 4
NC2025-1211	Valid Samples	2025-08-04	Nanchang Railway Station	Male	25–34years	High school or below	Visitors from Other Cities in Jiangxi Province	High-Speed Rail / Train	Traveling with Family/Children	1	1 Day	Very Concerned	Yes	0	0	0	0	0	1	0	0	0	0	0	1	0	0	0	0	0	0	1	0	0	0	76	Very good	Enumerator 3
NC2025-1212	Valid Samples	2025-07-13	Nanchang Changbei International Airport	Female	18–24years	Associate degree	Visitors from Other Provinces in China	Private Car	Traveling with Family/Children	1	1 Day	Neutral	Yes	1	0	0	0	1	0	0	0	0	0	0	0	0	0	1	0	1	1	1	0	0	0	64	Good	Enumerator 1
NC2025-1213	Valid Samples	2025-08-20	Nanchang East Railway Station	Male	35–44years	High school or below	Visitors from Other Cities in Jiangxi Province	High-Speed Rail / Train	Traveling with Family/Children	0	2–3 Days	Neutral	No	1	1	1	0	0	0	0	0	0	1	1	0	1	1	0	1	0	0	0	0	0	1	53	Acceptable	Enumerator 1
NC2025-1214	Valid Samples	2025-08-30	Nanchang Railway Station	Female	25–34years	Master's degree or above	Visitors from Other Cities in Jiangxi Province	Other	Traveling with Friends	2	2–3 Days	Very Concerned	Yes	0	1	0	0	1	1	1	0	0	1	0	0	1	0	0	0	0	0	0	0	0	0	68	Good	Enumerator 4
NC2025-1215	Valid Samples	2025-07-06	Nanchang East Railway Station	Female	25–34years	Associate degree	Visitors from Other Provinces in China	High-Speed Rail / Train	Traveling with Family/Children	0	2–3 Days	Very Concerned	Yes	1	0	0	0	1	0	1	0	0	1	1	1	1	0	1	0	1	1	0	1	0	0	72	Very good	Enumerator 3
NC2025-1216	Valid Samples	2025-07-15	Nanchang Railway Station	Male	35–44years	Bachelor's degree	Visitors from Other Provinces in China	Private Car	Group Tour	0	4–7 Days	Neutral	No	0	0	0	0	0	1	0	0	0	0	1	0	1	1	0	1	0	0	0	0	0	1	80	Excellent	Enumerator 1
NC2025-1217	Valid Samples	2025-08-26	Nanchang West Railway Station	Male	25–34years	Associate degree	Visitors from Other Provinces in China	Private Car	Traveling with Friends	1	Less than Half a Day	Very Concerned	Yes	1	0	0	0	0	0	0	0	0	1	0	0	0	0	0	0	1	1	0	0	0	0	63	Good	Enumerator 4
NC2025-1218	Valid Samples	2025-07-21	Nanchang Railway Station	Male	≥60years	High school or below	Visitors from Other Provinces in China	High-Speed Rail / Train	Traveling with Friends	0	Less than Half a Day	Very Concerned	No	1	0	0	0	0	0	1	1	0	1	0	1	1	0	0	0	0	0	0	0	0	1	78	Very good	Enumerator 4
NC2025-1219	Valid Samples	2025-08-15	Nanchang Changbei International Airport	Female	18–24years	High school or below	Visitors from Other Provinces in China	Private Car	Traveling Alone	1	2–3 Days	Not Concerned at All	No	0	0	1	0	1	1	1	0	0	0	0	0	0	0	0	0	0	0	0	0	0	1	77	Very good	Enumerator 4
NC2025-1221	Valid Samples	2025-08-21	Nanchang Railway Station	Male	18–24years	Bachelor's degree	Visitors from Other Provinces in China	High-Speed Rail / Train	Traveling with Family/Children	0	2–3 Days	Moderately Concerned	Yes	1	1	0	0	0	0	0	0	0	1	0	1	0	0	0	1	0	0	0	1	0	0	81	Excellent	Enumerator 2
NC2025-1223	Valid Samples	2025-08-02	Nanchang East Railway Station	Female	25–34years	Bachelor's degree	Local Visitors from Nanchang	High-Speed Rail / Train	Traveling with Friends	0	1 Day	Moderately Concerned	No	1	1	0	0	0	1	1	0	0	0	1	0	0	1	0	0	0	0	0	0	0	1	65	Good	Enumerator 4
NC2025-1224	Valid Samples	2025-07-30	Nanchang Railway Station	Male	25–34years	High school or below	Visitors from Other Provinces in China	High-Speed Rail / Train	Traveling with Family/Children	0	4–7 Days	Moderately Concerned	Yes	0	1	0	0	0	0	0	0	0	0	0	1	0	0	0	0	0	0	0	0	0	0	79	Very good	Enumerator 3
NC2025-1225	Valid Samples	2025-07-20	Nanchang Railway Station	Female	≥60years	Bachelor's degree	Local Visitors from Nanchang	High-Speed Rail / Train	Traveling with Family/Children	1	1 Day	Moderately Concerned	No	1	0	0	1	0	0	0	0	0	1	0	1	0	0	1	0	0	0	0	0	0	1	55	Acceptable	Enumerator 4
NC2025-1226	Valid Samples	2025-07-20	Nanchang Changbei International Airport	Female	45–59years	High school or below	Local Visitors from Nanchang	Private Car	Traveling with Family/Children	0	2–3 Days	Moderately Concerned	No	1	0	0	0	0	1	0	0	0	0	1	1	0	1	0	0	0	0	0	0	0	1	58	Acceptable	Enumerator 2
NC2025-1227	Valid Samples	2025-07-09	Nanchang Railway Station	Male	45–59years	Bachelor's degree	Visitors from Other Cities in Jiangxi Province	High-Speed Rail / Train	Traveling with Family/Children	1	2–3 Days	Moderately Concerned	Yes	1	0	1	1	1	1	0	0	0	0	0	1	0	0	0	1	1	0	0	0	1	0	77	Very good	Enumerator 3
NC2025-1228	Valid Samples	2025-07-16	Nanchang Changbei International Airport	Male	35–44years	Associate degree	Local Visitors from Nanchang	Airplane	Traveling Alone	0	1 Day	Very Concerned	Yes	1	0	0	0	1	0	1	0	0	1	0	0	0	0	0	0	0	1	1	0	0	0	57	Acceptable	Enumerator 2
NC2025-1229	Valid Samples	2025-08-25	Nanchang South Railway Station	Female	25–34years	Bachelor's degree	Local Visitors from Nanchang	High-Speed Rail / Train	Traveling with Friends	1	1 Day	Neutral	Yes	0	0	1	0	0	0	0	0	0	0	0	0	0	0	0	0	0	0	0	0	1	0	64	Good	Enumerator 1
NC2025-1230	Valid Samples	2025-07-13	Nanchang East Railway Station	Male	45–59years	Bachelor's degree	Visitors from Other Provinces in China	High-Speed Rail / Train	Traveling with Partner	0	2–3 Days	Moderately Concerned	Yes	1	0	1	1	0	0	0	0	0	0	0	1	1	0	0	0	0	0	0	0	0	0	64	Good	Enumerator 4
NC2025-1231	Valid Samples	2025-07-07	Nanchang Railway Station	Female	25–34years	Bachelor's degree	Local Visitors from Nanchang	Private Car	Traveling with Family/Children	0	1 Day	Very Concerned	Yes	0	1	0	0	0	1	1	0	0	1	1	0	0	1	0	1	0	0	1	0	0	0	67	Good	Enumerator 4
NC2025-1232	Valid Samples	2025-08-22	Nanchang Changbei International Airport	Female	35–44years	Master's degree or above	Visitors from Other Cities in Jiangxi Province	Private Car	Group Tour	2	2–3 Days	Neutral	No	1	0	0	0	1	1	0	0	0	1	0	1	0	0	0	0	0	0	0	0	0	1	79	Very good	Enumerator 4
NC2025-1233	Valid Samples	2025-07-18	Nanchang South Railway Station	Female	45–59years	Associate degree	Visitors from Other Provinces in China	High-Speed Rail / Train	Traveling with Family/Children	0	2–3 Days	Neutral	Yes	1	0	0	0	1	0	1	0	0	1	1	0	1	1	0	0	0	0	0	0	0	0	63	Good	Enumerator 3
NC2025-1234	Valid Samples	2025-08-08	Nanchang West Railway Station	Male	25–34years	Bachelor's degree	Visitors from Other Cities in Jiangxi Province	High-Speed Rail / Train	Group Tour	1	2–3 Days	Not Concerned at All	No	1	0	0	0	1	0	1	0	0	0	1	0	1	0	1	0	0	0	0	0	0	1	62	Good	Enumerator 3
NC2025-1235	Valid Samples	2025-07-13	Nanchang West Railway Station	Female	25–34years	Bachelor's degree	Visitors from Other Provinces in China	Long-Distance Bus	Traveling with Friends	0	4–7 Days	Very Concerned	Yes	1	0	0	1	0	0	0	0	0	1	0	1	1	1	0	0	0	0	0	0	0	0	63	Good	Enumerator 3
NC2025-1236	Valid Samples	2025-08-29	Nanchang Changbei International Airport	Male	35–44years	Bachelor's degree	Visitors from Other Provinces in China	Airplane	Traveling with Family/Children	1	1 Day	Slightly Concerned	No	0	1	1	1	0	0	0	0	0	0	0	1	0	0	0	1	0	0	0	0	0	1	81	Excellent	Enumerator 1
NC2025-1237	Valid Samples	2025-07-07	Nanchang West Railway Station	Female	18–24years	High school or below	Visitors from Other Provinces in China	Long-Distance Bus	Traveling with Partner	2	1 Day	Moderately Concerned	No	0	0	1	0	0	0	0	0	0	1	0	1	0	0	0	1	0	0	0	0	0	1	66	Good	Enumerator 2
NC2025-1239	Valid Samples	2025-07-05	Nanchang Railway Station	Male	35–44years	Associate degree	Visitors from Other Cities in Jiangxi Province	Private Car	Traveling with Friends	1	4–7 Days	Neutral	Yes	1	0	1	1	0	1	0	0	1	0	1	1	0	0	0	0	0	0	0	0	0	0	78	Very good	Enumerator 2
NC2025-1240	Valid Samples	2025-08-18	Nanchang East Railway Station	Female	25–34years	Bachelor's degree	Visitors from Other Cities in Jiangxi Province	Local Public Transportation	Traveling with Family/Children	1	2–3 Days	Neutral	Yes	0	1	0	1	1	0	0	0	0	1	0	0	0	1	0	0	0	0	0	0	0	0	80	Excellent	Enumerator 2
NC2025-1241	Valid Samples	2025-07-22	Nanchang Railway Station	Female	35–44years	High school or below	Visitors from Other Cities in Jiangxi Province	High-Speed Rail / Train	Traveling with Friends	0	2–3 Days	Very Concerned	Yes	1	0	0	0	1	1	0	0	0	1	0	1	0	0	0	0	0	0	0	0	0	0	64	Good	Enumerator 2
NC2025-1242	Valid Samples	2025-06-30	Nanchang West Railway Station	Female	25–34years	Associate degree	Visitors from Other Cities in Jiangxi Province	Private Car	Traveling with Friends	0	2–3 Days	Moderately Concerned	No	1	0	0	0	0	1	0	0	0	1	0	1	0	0	0	0	0	0	0	0	0	1	70	Very good	Enumerator 2
NC2025-1243	Valid Samples	2025-07-31	Nanchang South Railway Station	Female	35–44years	Associate degree	Visitors from Other Cities in Jiangxi Province	High-Speed Rail / Train	Traveling with Partner	0	Less than Half a Day	Neutral	No	1	0	0	1	0	1	0	0	0	0	1	0	0	1	0	0	0	0	0	0	0	1	55	Acceptable	Enumerator 3
NC2025-1244	Valid Samples	2025-08-06	Nanchang Railway Station	Female	35–44years	Associate degree	Visitors from Other Cities in Jiangxi Province	Private Car	Traveling with Family/Children	0	4–7 Days	Moderately Concerned	No	1	1	0	1	1	0	0	0	0	0	1	1	1	1	0	0	0	0	0	0	0	1	76	Very good	Enumerator 3
NC2025-1245	Valid Samples	2025-08-03	Nanchang West Railway Station	Male	18–24years	High school or below	Visitors from Other Provinces in China	Private Car	Group Tour	1	1 Day	Slightly Concerned	Yes	1	1	1	1	0	0	1	0	0	0	0	1	0	1	0	0	0	0	0	0	0	0	72	Very good	Enumerator 1
NC2025-1246	Valid Samples	2025-07-28	Nanchang East Railway Station	Female	18–24years	Bachelor's degree	Visitors from Other Cities in Jiangxi Province	Private Car	Traveling Alone	1	Less than Half a Day	Neutral	No	1	0	0	0	0	0	0	0	0	1	0	1	0	0	1	0	0	0	0	0	0	1	60	Good	Enumerator 4
NC2025-1247	Valid Samples	2025-07-28	Nanchang West Railway Station	Male	45–59years	High school or below	Visitors from Other Provinces in China	Private Car	Traveling with Family/Children	1	2–3 Days	Slightly Concerned	No	0	0	1	1	0	0	0	0	0	1	0	0	0	0	0	1	0	0	0	0	0	1	75	Very good	Enumerator 1
NC2025-1248	Valid Samples	2025-07-21	Nanchang Changbei International Airport	Male	25–34years	Associate degree	Visitors from Other Cities in Jiangxi Province	Airplane	Traveling with Friends	0	2–3 Days	Very Concerned	Yes	0	0	0	0	1	1	0	0	0	0	1	1	0	0	0	0	0	0	0	0	1	0	64	Good	Enumerator 1
NC2025-1249	Valid Samples	2025-08-01	Nanchang East Railway Station	Male	25–34years	Bachelor's degree	Visitors from Other Cities in Jiangxi Province	Private Car	Traveling Alone	0	1 Day	Slightly Concerned	No	1	0	1	0	0	0	0	0	0	0	0	1	0	0	0	0	0	0	0	0	0	1	88	Excellent	Enumerator 3
NC2025-1250	Valid Samples	2025-07-28	Nanchang Changbei International Airport	Male	25–34years	High school or below	Visitors from Hong Kong, Macao, Taiwan, and Overseas	Airplane	Traveling with Family/Children	0	1 Day	Very Concerned	No	1	0	0	0	1	0	0	0	0	0	0	1	0	0	0	0	0	0	0	0	0	1	57	Acceptable	Enumerator 2
NC2025-1251	Valid Samples	2025-07-05	Nanchang Changbei International Airport	Female	18–24years	Associate degree	Visitors from Hong Kong, Macao, Taiwan, and Overseas	Private Car	Group Tour	0	2–3 Days	Moderately Concerned	Yes	1	0	0	0	0	1	0	0	0	1	1	0	1	0	1	1	0	0	0	0	0	0	72	Very good	Enumerator 1
NC2025-1252	Valid Samples	2025-07-19	Nanchang East Railway Station	Female	25–34years	Bachelor's degree	Visitors from Other Provinces in China	Private Car	Traveling with Family/Children	2	4–7 Days	Very Concerned	Yes	1	0	1	1	0	0	1	0	0	0	0	1	1	0	0	1	0	0	0	0	0	0	70	Very good	Enumerator 2
NC2025-1253	Valid Samples	2025-08-10	Nanchang Railway Station	Female	18–24years	Bachelor's degree	Local Visitors from Nanchang	High-Speed Rail / Train	Traveling with Friends	0	1 Day	Moderately Concerned	No	0	1	0	0	0	0	0	0	0	1	0	1	1	0	0	1	0	0	0	0	0	1	76	Very good	Enumerator 2
NC2025-1254	Valid Samples	2025-07-04	Nanchang Changbei International Airport	Male	35–44years	Master's degree or above	Local Visitors from Nanchang	Airplane	Traveling with Partner	0	2–3 Days	Very Concerned	Yes	1	0	1	0	0	1	0	0	0	1	0	0	1	0	1	0	0	0	0	1	0	0	65	Good	Enumerator 4
NC2025-1255	Valid Samples	2025-07-08	Nanchang Railway Station	Female	18–24years	High school or below	Visitors from Other Provinces in China	Private Car	Traveling with Friends	0	1 Day	Moderately Concerned	No	1	1	1	1	0	1	0	0	0	1	0	0	1	0	0	0	0	0	0	0	0	1	63	Good	Enumerator 1
NC2025-1256	Valid Samples	2025-07-29	Nanchang Changbei International Airport	Male	25–34years	High school or below	Visitors from Other Provinces in China	Private Car	Traveling with Family/Children	1	4–7 Days	Moderately Concerned	Yes	0	0	0	0	1	1	1	0	0	1	0	1	1	0	0	0	0	0	0	0	0	0	62	Good	Enumerator 2
NC2025-1257	Valid Samples	2025-08-13	Nanchang South Railway Station	Male	25–34years	Bachelor's degree	Visitors from Other Cities in Jiangxi Province	High-Speed Rail / Train	Traveling Alone	0	1 Day	Slightly Concerned	No	1	0	0	0	1	0	1	0	0	0	0	0	1	0	0	1	0	0	0	0	0	1	70	Very good	Enumerator 1
NC2025-1258	Valid Samples	2025-08-11	Nanchang South Railway Station	Female	18–24years	Bachelor's degree	Visitors from Other Provinces in China	High-Speed Rail / Train	Traveling with Friends	0	Less than Half a Day	Moderately Concerned	No	0	1	1	1	0	0	0	0	0	0	0	0	0	0	0	0	0	0	0	0	0	1	72	Very good	Enumerator 2
NC2025-1259	Valid Samples	2025-07-10	Nanchang South Railway Station	Male	25–34years	Associate degree	Visitors from Other Provinces in China	High-Speed Rail / Train	Traveling with Friends	0	2–3 Days	Very Concerned	No	1	0	1	0	0	0	0	0	0	0	1	1	0	0	0	1	0	0	0	0	0	1	81	Excellent	Enumerator 2
NC2025-1260	Valid Samples	2025-07-24	Nanchang West Railway Station	Female	25–34years	Master's degree or above	Visitors from Other Cities in Jiangxi Province	High-Speed Rail / Train	Traveling with Family/Children	0	Less than Half a Day	Neutral	Yes	1	1	1	0	1	0	1	0	0	1	0	0	1	1	0	1	0	0	0	0	0	0	47	Marginal	Enumerator 4
NC2025-1261	Valid Samples	2025-08-18	Nanchang West Railway Station	Female	35–44years	Bachelor's degree	Visitors from Other Provinces in China	Private Car	Traveling with Family/Children	2	1 Day	Very Concerned	Yes	0	0	1	1	1	0	0	0	0	1	0	1	0	0	0	0	0	0	0	0	0	0	58	Acceptable	Enumerator 4
NC2025-1262	Valid Samples	2025-07-11	Nanchang East Railway Station	Female	35–44years	Bachelor's degree	Visitors from Other Cities in Jiangxi Province	High-Speed Rail / Train	Traveling with Family/Children	0	2–3 Days	Slightly Concerned	No	1	1	1	0	0	0	0	0	0	0	1	1	0	0	0	0	0	0	0	0	0	1	68	Good	Enumerator 4
NC2025-1263	Valid Samples	2025-08-10	Nanchang West Railway Station	Male	25–34years	Associate degree	Visitors from Other Cities in Jiangxi Province	Other	Traveling with Friends	0	2–3 Days	Neutral	Yes	1	1	0	1	1	0	0	0	0	0	0	0	0	1	0	0	1	1	0	0	0	0	69	Good	Enumerator 2
NC2025-1264	Valid Samples	2025-07-02	Nanchang South Railway Station	Male	45–59years	Master's degree or above	Visitors from Other Provinces in China	High-Speed Rail / Train	Traveling with Friends	0	1 Day	Very Concerned	No	1	1	0	0	0	1	1	0	0	1	1	1	1	1	0	0	0	0	0	0	0	1	79	Very good	Enumerator 1
NC2025-1265	Valid Samples	2025-08-14	Nanchang Railway Station	Female	45–59years	Master's degree or above	Visitors from Other Cities in Jiangxi Province	High-Speed Rail / Train	Traveling with Family/Children	0	4–7 Days	Moderately Concerned	No	1	1	1	0	1	1	0	0	0	1	1	1	0	0	0	0	0	0	0	0	0	1	79	Very good	Enumerator 3
NC2025-1266	Valid Samples	2025-08-01	Nanchang East Railway Station	Female	18–24years	Associate degree	Visitors from Other Cities in Jiangxi Province	High-Speed Rail / Train	Traveling Alone	0	2–3 Days	Moderately Concerned	No	1	1	0	1	0	0	0	0	0	1	0	0	1	0	0	0	0	0	0	0	0	1	58	Acceptable	Enumerator 2
NC2025-1267	Valid Samples	2025-07-18	Nanchang Railway Station	Male	18–24years	Bachelor's degree	Visitors from Other Cities in Jiangxi Province	Local Public Transportation	Traveling with Partner	1	2–3 Days	Very Concerned	Yes	0	1	0	1	0	1	0	0	0	1	0	1	0	0	1	0	0	0	0	1	0	0	66	Good	Enumerator 4
NC2025-1268	Valid Samples	2025-07-29	Nanchang East Railway Station	Male	18–24years	Associate degree	Visitors from Other Provinces in China	Private Car	Traveling with Friends	0	2–3 Days	Moderately Concerned	No	0	0	0	0	0	0	0	0	0	0	0	0	1	0	0	0	0	0	0	0	0	1	72	Very good	Enumerator 2
NC2025-1269	Valid Samples	2025-08-18	Nanchang Changbei International Airport	Female	25–34years	Bachelor's degree	Visitors from Other Provinces in China	Airplane	Traveling with Friends	2	4–7 Days	Neutral	No	0	1	0	1	1	1	0	0	0	0	1	0	1	0	0	0	0	0	0	0	0	1	79	Very good	Enumerator 2
NC2025-1271	Valid Samples	2025-07-04	Nanchang Changbei International Airport	Male	25–34years	Bachelor's degree	Visitors from Other Cities in Jiangxi Province	Airplane	Group Tour	0	2–3 Days	Moderately Concerned	Yes	1	1	0	0	1	1	0	0	0	0	0	1	1	0	0	0	0	0	0	0	0	0	70	Very good	Enumerator 2
NC2025-1272	Valid Samples	2025-08-23	Nanchang West Railway Station	Female	25–34years	Bachelor's degree	Visitors from Other Provinces in China	High-Speed Rail / Train	Traveling with Friends	0	1 Day	Moderately Concerned	No	0	0	0	1	0	0	0	0	0	1	0	1	1	0	1	1	0	0	0	0	0	1	55	Acceptable	Enumerator 1
NC2025-1273	Valid Samples	2025-07-25	Nanchang West Railway Station	Female	18–24years	Bachelor's degree	Visitors from Other Provinces in China	High-Speed Rail / Train	Traveling Alone	0	Less than Half a Day	Very Concerned	No	1	1	1	1	0	0	0	0	0	0	0	0	0	0	0	0	0	0	0	0	0	1	71	Very good	Enumerator 4
NC2025-1274	Valid Samples	2025-06-30	Nanchang West Railway Station	Female	25–34years	Master's degree or above	Visitors from Other Cities in Jiangxi Province	High-Speed Rail / Train	Group Tour	0	1 Day	Very Concerned	No	0	0	0	0	0	0	0	0	0	1	0	0	0	1	0	0	0	0	0	0	0	1	70	Very good	Enumerator 1
NC2025-1275	Valid Samples	2025-07-10	Nanchang Railway Station	Male	18–24years	Bachelor's degree	Local Visitors from Nanchang	High-Speed Rail / Train	Traveling with Friends	1	1 Day	Very Concerned	Yes	1	1	1	1	0	0	0	0	0	1	0	1	1	1	0	0	0	0	0	1	0	0	49	Marginal	Enumerator 3
NC2025-1276	Valid Samples	2025-07-10	Nanchang East Railway Station	Male	45–59years	High school or below	Visitors from Other Provinces in China	Local Public Transportation	Group Tour	1	4–7 Days	Neutral	Yes	1	1	0	1	0	0	0	0	0	0	1	0	0	0	0	1	0	0	0	0	0	0	50	Acceptable	Enumerator 4
NC2025-1277	Valid Samples	2025-08-03	Nanchang Changbei International Airport	Female	25–34years	Associate degree	Visitors from Other Provinces in China	Airplane	Traveling with Family/Children	2	1 Day	Neutral	No	0	0	1	0	0	0	1	1	0	1	0	0	1	1	0	1	0	0	0	0	0	1	61	Good	Enumerator 1
NC2025-1279	Valid Samples	2025-07-07	Nanchang Railway Station	Female	18–24years	Bachelor's degree	Visitors from Other Provinces in China	Local Public Transportation	Group Tour	0	2–3 Days	Neutral	Yes	0	1	0	1	0	0	0	1	0	1	1	1	0	0	0	0	1	1	1	0	0	0	63	Good	Enumerator 2
NC2025-1280	Valid Samples	2025-08-24	Nanchang Railway Station	Male	35–44years	Associate degree	Visitors from Other Cities in Jiangxi Province	Private Car	Group Tour	0	2–3 Days	Moderately Concerned	No	0	0	0	1	0	1	1	0	0	1	0	1	1	1	0	0	0	0	0	0	0	1	86	Excellent	Enumerator 2
NC2025-1281	Valid Samples	2025-08-14	Nanchang West Railway Station	Female	18–24years	Bachelor's degree	Visitors from Other Cities in Jiangxi Province	Private Car	Traveling with Family/Children	0	1 Day	Moderately Concerned	No	1	0	1	0	0	0	0	0	0	0	0	0	1	0	0	0	0	0	0	0	0	1	69	Good	Enumerator 4
NC2025-1282	Valid Samples	2025-08-03	Nanchang Railway Station	Female	45–59years	Bachelor's degree	Visitors from Other Cities in Jiangxi Province	High-Speed Rail / Train	Group Tour	0	2–3 Days	Neutral	No	1	1	0	0	0	0	0	0	0	1	0	0	1	0	0	0	0	0	0	0	0	1	58	Acceptable	Enumerator 1
NC2025-1283	Valid Samples	2025-07-25	Nanchang Changbei International Airport	Female	35–44years	Bachelor's degree	Visitors from Other Provinces in China	Airplane	Traveling with Family/Children	0	2–3 Days	Not Concerned at All	No	1	0	1	0	0	0	0	0	0	0	0	0	1	0	0	0	0	0	0	0	0	1	71	Very good	Enumerator 1
NC2025-1284	Valid Samples	2025-08-27	Nanchang West Railway Station	Male	35–44years	High school or below	Visitors from Other Cities in Jiangxi Province	High-Speed Rail / Train	Traveling with Family/Children	0	2–3 Days	Slightly Concerned	Yes	0	1	1	0	0	1	0	0	0	1	1	0	0	0	1	0	0	0	0	0	1	0	52	Acceptable	Enumerator 1
NC2025-1285	Valid Samples	2025-08-17	Nanchang West Railway Station	Female	45–59years	Bachelor's degree	Visitors from Other Cities in Jiangxi Province	Local Public Transportation	Traveling with Friends	2	2–3 Days	Neutral	No	1	1	0	0	0	0	1	0	0	1	1	0	0	0	0	1	0	0	0	0	0	1	82	Excellent	Enumerator 4
NC2025-1286	Valid Samples	2025-08-12	Nanchang East Railway Station	Male	25–34years	Master's degree or above	Visitors from Other Cities in Jiangxi Province	Private Car	Traveling with Family/Children	2	1 Day	Neutral	Yes	1	1	0	0	0	0	0	0	0	1	0	0	0	0	0	0	0	0	1	0	0	0	56	Acceptable	Enumerator 1
NC2025-1288	Valid Samples	2025-07-24	Nanchang East Railway Station	Male	35–44years	Bachelor's degree	Visitors from Other Provinces in China	High-Speed Rail / Train	Traveling with Friends	0	2–3 Days	Very Concerned	No	1	0	0	1	0	0	1	0	0	0	1	0	1	1	1	0	0	0	0	0	0	1	60	Good	Enumerator 4
NC2025-1289	Valid Samples	2025-07-06	Nanchang Railway Station	Male	18–24years	Associate degree	Visitors from Other Provinces in China	High-Speed Rail / Train	Traveling with Family/Children	0	More than 7 Days	Neutral	No	1	0	0	1	0	0	1	0	0	1	1	1	1	1	0	0	0	0	0	0	0	1	85	Excellent	Enumerator 2
NC2025-1290	Valid Samples	2025-07-01	Nanchang Railway Station	Male	18–24years	Master's degree or above	Visitors from Other Provinces in China	High-Speed Rail / Train	Traveling with Friends	0	4–7 Days	Neutral	Yes	0	1	1	1	1	0	0	0	0	1	0	0	1	0	1	0	0	0	0	0	0	0	44	Marginal	Enumerator 1
NC2025-1291	Valid Samples	2025-08-15	Nanchang East Railway Station	Male	35–44years	Bachelor's degree	Visitors from Other Provinces in China	High-Speed Rail / Train	Traveling with Partner	0	2–3 Days	Moderately Concerned	Yes	0	1	0	0	1	1	0	0	0	1	1	0	1	0	0	0	0	0	0	0	0	0	77	Very good	Enumerator 2
NC2025-1292	Valid Samples	2025-08-18	Nanchang Changbei International Airport	Male	35–44years	Bachelor's degree	Visitors from Other Provinces in China	Airplane	Traveling with Family/Children	0	4–7 Days	Moderately Concerned	No	0	0	0	0	1	0	0	0	0	1	0	0	0	1	0	0	0	0	0	0	0	1	57	Acceptable	Enumerator 4
NC2025-1293	Valid Samples	2025-07-24	Nanchang Railway Station	Female	18–24years	Bachelor's degree	Local Visitors from Nanchang	High-Speed Rail / Train	Traveling with Family/Children	0	2–3 Days	Moderately Concerned	Yes	0	0	0	1	0	1	0	0	0	0	1	1	0	0	0	0	1	0	0	1	0	0	49	Marginal	Enumerator 2
NC2025-1294	Valid Samples	2025-07-07	Nanchang Changbei International Airport	Female	18–24years	High school or below	Visitors from Other Provinces in China	Airplane	Traveling with Family/Children	0	2–3 Days	Very Concerned	No	0	0	0	0	0	1	0	0	0	0	0	0	1	0	1	0	0	0	0	0	0	1	66	Good	Enumerator 2
NC2025-1295	Valid Samples	2025-07-04	Nanchang Changbei International Airport	Female	45–59years	Bachelor's degree	Visitors from Other Cities in Jiangxi Province	Airplane	Group Tour	0	1 Day	Neutral	No	1	0	0	1	1	1	0	0	0	1	0	0	0	0	1	1	0	0	0	0	0	1	47	Marginal	Enumerator 1
NC2025-1296	Valid Samples	2025-08-24	Nanchang South Railway Station	Female	45–59years	Bachelor's degree	Visitors from Other Cities in Jiangxi Province	High-Speed Rail / Train	Traveling with Friends	0	4–7 Days	Moderately Concerned	No	0	0	1	1	0	0	0	0	0	0	0	1	0	0	1	0	0	0	0	0	0	1	63	Good	Enumerator 1
NC2025-1297	Valid Samples	2025-07-27	Nanchang Changbei International Airport	Female	25–34years	Bachelor's degree	Visitors from Other Provinces in China	Airplane	Traveling Alone	0	1 Day	Slightly Concerned	Yes	0	0	0	0	0	0	0	1	0	0	0	1	0	0	0	0	1	0	0	0	0	0	53	Acceptable	Enumerator 4
NC2025-1299	Valid Samples	2025-08-06	Nanchang South Railway Station	Male	18–24years	Bachelor's degree	Visitors from Other Cities in Jiangxi Province	High-Speed Rail / Train	Traveling with Friends	0	4–7 Days	Moderately Concerned	No	0	0	1	0	0	1	1	0	0	0	0	0	0	0	1	0	0	0	0	0	0	1	56	Acceptable	Enumerator 3
NC2025-1300	Valid Samples	2025-08-26	Nanchang South Railway Station	Female	25–34years	Bachelor's degree	Visitors from Other Provinces in China	High-Speed Rail / Train	Traveling with Friends	0	2–3 Days	Neutral	No	1	1	0	0	0	0	0	0	0	1	0	0	0	0	1	0	0	0	0	0	0	1	65	Good	Enumerator 2
NC2025-1302	Valid Samples	2025-08-01	Nanchang Railway Station	Female	25–34years	High school or below	Visitors from Other Provinces in China	Long-Distance Bus	Traveling with Family/Children	0	2–3 Days	Very Concerned	Yes	1	0	0	0	0	1	0	0	0	1	0	0	0	0	0	0	0	1	0	1	0	0	59	Acceptable	Enumerator 2
NC2025-1303	Valid Samples	2025-07-29	Nanchang South Railway Station	Female	25–34years	Bachelor's degree	Visitors from Other Cities in Jiangxi Province	High-Speed Rail / Train	Group Tour	2	2–3 Days	Moderately Concerned	No	1	1	1	0	0	1	0	0	0	1	0	0	0	1	0	0	0	0	0	0	0	1	87	Excellent	Enumerator 2
NC2025-1304	Valid Samples	2025-07-01	Nanchang Changbei International Airport	Female	25–34years	Associate degree	Visitors from Other Provinces in China	Airplane	Traveling with Friends	0	2–3 Days	Moderately Concerned	Yes	1	1	0	1	0	0	0	0	0	1	0	1	0	0	0	0	0	1	0	0	0	0	49	Marginal	Enumerator 2
NC2025-1305	Valid Samples	2025-08-12	Nanchang Changbei International Airport	Male	25–34years	Associate degree	Visitors from Other Cities in Jiangxi Province	Airplane	Traveling with Partner	0	4–7 Days	Very Concerned	No	1	1	0	0	0	0	0	0	0	0	1	1	1	1	0	0	0	0	0	0	0	1	60	Good	Enumerator 4
NC2025-1306	Valid Samples	2025-08-14	Nanchang West Railway Station	Male	25–34years	Bachelor's degree	Local Visitors from Nanchang	High-Speed Rail / Train	Traveling with Friends	0	Less than Half a Day	Very Concerned	Yes	0	0	1	0	1	1	0	0	0	1	0	0	0	0	0	0	0	1	0	0	0	0	50	Acceptable	Enumerator 3
NC2025-1307	Valid Samples	2025-08-04	Nanchang Railway Station	Female	25–34years	Bachelor's degree	Visitors from Other Provinces in China	Other	Traveling with Friends	0	4–7 Days	Slightly Concerned	Yes	1	0	0	0	0	1	0	0	0	1	0	1	0	0	0	1	1	0	0	0	0	0	57	Acceptable	Enumerator 2
NC2025-1308	Valid Samples	2025-06-30	Nanchang West Railway Station	Female	18–24years	High school or below	Visitors from Other Cities in Jiangxi Province	High-Speed Rail / Train	Traveling with Friends	0	4–7 Days	Moderately Concerned	No	1	1	0	0	0	0	0	0	0	1	1	1	0	0	0	0	0	0	0	0	0	1	37	nfavorable	Enumerator 4
NC2025-1309	Valid Samples	2025-08-03	Nanchang Changbei International Airport	Male	45–59years	Bachelor's degree	Visitors from Other Provinces in China	Airplane	Traveling with Family/Children	0	4–7 Days	Slightly Concerned	Yes	0	1	0	1	1	0	0	0	0	0	0	0	1	0	0	0	1	0	0	0	0	0	67	Good	Enumerator 3
NC2025-1310	Valid Samples	2025-08-13	Nanchang East Railway Station	Female	18–24years	High school or below	Visitors from Other Provinces in China	High-Speed Rail / Train	Traveling with Friends	1	2–3 Days	Neutral	Yes	1	0	1	0	0	0	0	0	0	1	0	1	1	1	0	0	1	0	1	0	1	0	84	Excellent	Enumerator 3
NC2025-1311	Valid Samples	2025-07-05	Nanchang South Railway Station	Male	25–34years	Associate degree	Visitors from Hong Kong, Macao, Taiwan, and Overseas	High-Speed Rail / Train	Traveling with Family/Children	1	2–3 Days	Slightly Concerned	Yes	0	1	1	1	0	0	0	0	0	1	0	0	1	0	0	0	0	0	1	0	0	0	62	Good	Enumerator 1
NC2025-1312	Valid Samples	2025-07-16	Nanchang East Railway Station	Male	45–59years	Associate degree	Visitors from Other Cities in Jiangxi Province	Private Car	Group Tour	0	4–7 Days	Neutral	No	1	0	1	0	1	0	0	0	0	1	1	0	0	0	0	0	0	0	0	0	0	1	87	Excellent	Enumerator 4
NC2025-1313	Valid Samples	2025-07-11	Nanchang Railway Station	Male	18–24years	Master's degree or above	Visitors from Other Provinces in China	Local Public Transportation	Traveling with Partner	0	2–3 Days	Not Concerned at All	No	1	1	0	0	0	1	0	0	0	1	0	1	0	1	0	0	0	0	0	0	0	1	72	Very good	Enumerator 2
NC2025-1314	Valid Samples	2025-07-15	Nanchang Changbei International Airport	Female	25–34years	Bachelor's degree	Visitors from Other Provinces in China	Private Car	Traveling with Family/Children	2	Less than Half a Day	Moderately Concerned	No	1	0	1	0	0	0	0	1	0	1	1	0	0	0	1	0	0	0	0	0	0	1	74	Very good	Enumerator 3
NC2025-1315	Valid Samples	2025-07-19	Nanchang Railway Station	Male	25–34years	High school or below	Local Visitors from Nanchang	High-Speed Rail / Train	Traveling with Friends	0	2–3 Days	Very Concerned	No	1	1	1	0	1	0	0	0	0	1	1	0	0	1	1	1	0	0	0	0	0	1	67	Good	Enumerator 1
NC2025-1317	Valid Samples	2025-07-14	Nanchang West Railway Station	Male	35–44years	Master's degree or above	Visitors from Other Provinces in China	High-Speed Rail / Train	Traveling with Friends	0	2–3 Days	Moderately Concerned	Yes	0	0	1	1	0	1	0	0	0	0	0	0	1	0	0	0	0	0	0	0	0	0	70	Very good	Enumerator 3
NC2025-1318	Valid Samples	2025-08-20	Nanchang East Railway Station	Female	25–34years	Master's degree or above	Visitors from Other Provinces in China	High-Speed Rail / Train	Traveling with Friends	0	4–7 Days	Very Concerned	Yes	0	0	0	0	0	0	1	0	0	0	1	0	0	0	0	0	0	0	1	1	0	0	62	Good	Enumerator 1
NC2025-1319	Valid Samples	2025-07-03	Nanchang South Railway Station	Female	18–24years	Master's degree or above	Local Visitors from Nanchang	High-Speed Rail / Train	Traveling with Partner	1	1 Day	Very Concerned	Yes	0	1	0	1	0	0	0	0	0	1	0	1	1	0	0	0	1	0	0	1	0	0	80	Excellent	Enumerator 2
NC2025-1321	Valid Samples	2025-08-28	Nanchang East Railway Station	Female	35–44years	High school or below	Visitors from Other Cities in Jiangxi Province	Private Car	Traveling with Friends	0	1 Day	Very Concerned	Yes	1	1	0	1	1	0	1	0	0	1	0	0	0	0	1	0	0	0	0	0	0	0	66	Good	Enumerator 2
NC2025-1322	Valid Samples	2025-07-20	Nanchang Railway Station	Female	25–34years	Bachelor's degree	Local Visitors from Nanchang	High-Speed Rail / Train	Traveling with Friends	1	4–7 Days	Moderately Concerned	No	1	1	1	0	0	0	0	0	0	1	0	0	1	0	0	1	0	0	0	0	0	1	60	Good	Enumerator 2
NC2025-1323	Valid Samples	2025-07-03	Nanchang Changbei International Airport	Female	45–59years	Associate degree	Visitors from Other Cities in Jiangxi Province	Airplane	Traveling with Family/Children	0	2–3 Days	Moderately Concerned	Yes	0	0	0	0	0	1	0	0	0	0	1	1	1	0	1	1	0	0	1	1	0	0	78	Very good	Enumerator 2
NC2025-1324	Valid Samples	2025-08-07	Nanchang East Railway Station	Male	18–24years	Master's degree or above	Visitors from Other Cities in Jiangxi Province	Private Car	Traveling with Friends	0	2–3 Days	Neutral	Yes	0	0	0	0	0	0	0	1	0	1	0	1	0	0	0	0	0	0	1	0	0	0	75	Very good	Enumerator 4
NC2025-1325	Valid Samples	2025-07-27	Nanchang West Railway Station	Male	18–24years	Associate degree	Visitors from Other Cities in Jiangxi Province	Local Public Transportation	Traveling Alone	0	Less than Half a Day	Neutral	Yes	1	0	0	0	1	1	0	0	0	1	0	0	0	0	0	0	0	0	0	0	0	0	57	Acceptable	Enumerator 2
NC2025-1326	Valid Samples	2025-08-16	Nanchang East Railway Station	Male	25–34years	Associate degree	Visitors from Other Provinces in China	High-Speed Rail / Train	Traveling with Family/Children	2	1 Day	Moderately Concerned	No	1	0	1	0	0	0	1	0	0	0	0	1	1	0	0	0	0	0	0	0	0	1	79	Very good	Enumerator 3
NC2025-1327	Valid Samples	2025-07-06	Nanchang Changbei International Airport	Female	35–44years	Master's degree or above	Local Visitors from Nanchang	Airplane	Traveling with Family/Children	0	2–3 Days	Slightly Concerned	No	1	0	1	0	0	1	0	0	0	0	1	1	0	0	0	1	0	0	0	0	0	1	57	Acceptable	Enumerator 4
NC2025-1328	Valid Samples	2025-08-21	Nanchang South Railway Station	Female	25–34years	Master's degree or above	Local Visitors from Nanchang	High-Speed Rail / Train	Traveling with Family/Children	1	1 Day	Neutral	No	1	0	0	0	0	0	0	0	0	0	0	0	0	0	0	0	0	0	0	0	0	1	64	Good	Enumerator 3
NC2025-1329	Valid Samples	2025-07-17	Nanchang South Railway Station	Female	18–24years	Bachelor's degree	Visitors from Other Provinces in China	High-Speed Rail / Train	Group Tour	0	1 Day	Very Concerned	No	1	1	1	1	0	0	0	0	0	1	0	1	0	0	0	0	0	0	0	0	0	1	91	Ideal	Enumerator 1
NC2025-1330	Valid Samples	2025-08-14	Nanchang East Railway Station	Female	18–24years	Associate degree	Visitors from Other Provinces in China	High-Speed Rail / Train	Traveling with Friends	0	2–3 Days	Very Concerned	No	1	1	0	1	0	1	0	0	1	1	1	0	0	0	1	0	0	0	0	0	0	1	71	Very good	Enumerator 3
NC2025-1331	Valid Samples	2025-08-03	Nanchang Changbei International Airport	Female	25–34years	Bachelor's degree	Visitors from Other Cities in Jiangxi Province	Airplane	Traveling Alone	0	Less than Half a Day	Moderately Concerned	No	1	0	1	1	0	1	0	0	0	0	1	1	1	0	0	0	0	0	0	0	0	1	71	Very good	Enumerator 3
NC2025-1332	Valid Samples	2025-08-02	Nanchang Changbei International Airport	Female	45–59years	Bachelor's degree	Visitors from Other Provinces in China	Airplane	Traveling with Friends	0	1 Day	Very Concerned	No	1	1	1	0	1	0	0	0	0	1	0	0	1	0	0	0	0	0	0	0	0	1	70	Very good	Enumerator 4
NC2025-1333	Valid Samples	2025-08-25	Nanchang Railway Station	Female	45–59years	Bachelor's degree	Visitors from Other Cities in Jiangxi Province	High-Speed Rail / Train	Traveling with Family/Children	0	4–7 Days	Neutral	Yes	1	0	0	0	0	0	0	0	1	0	1	1	1	0	0	1	1	0	0	0	0	0	61	Good	Enumerator 3
NC2025-1335	Valid Samples	2025-08-17	Nanchang West Railway Station	Male	35–44years	Associate degree	Local Visitors from Nanchang	High-Speed Rail / Train	Traveling with Friends	0	1 Day	Very Concerned	No	1	0	1	0	1	0	0	0	0	1	0	0	0	0	0	0	0	0	0	0	0	1	68	Good	Enumerator 1
NC2025-1336	Valid Samples	2025-07-09	Nanchang Changbei International Airport	Female	25–34years	High school or below	Visitors from Other Cities in Jiangxi Province	Private Car	Traveling with Partner	0	2–3 Days	Moderately Concerned	No	1	1	1	0	1	1	0	0	0	0	0	0	1	0	0	0	0	0	0	0	0	1	62	Good	Enumerator 3
NC2025-1337	Valid Samples	2025-08-24	Nanchang Changbei International Airport	Male	45–59years	Master's degree or above	Visitors from Other Provinces in China	Airplane	Group Tour	0	2–3 Days	Very Concerned	No	0	0	1	0	0	0	0	0	0	1	1	1	1	1	0	0	0	0	0	0	0	1	81	Excellent	Enumerator 4
NC2025-1338	Valid Samples	2025-08-08	Nanchang East Railway Station	Female	18–24years	Master's degree or above	Visitors from Other Cities in Jiangxi Province	High-Speed Rail / Train	Group Tour	0	2–3 Days	Moderately Concerned	No	1	1	0	1	1	1	0	0	0	1	0	1	0	0	0	0	0	0	0	0	0	1	47	Marginal	Enumerator 2
NC2025-1339	Valid Samples	2025-08-13	Nanchang Changbei International Airport	Female	18–24years	Bachelor's degree	Visitors from Other Provinces in China	Airplane	Traveling with Friends	0	More than 7 Days	Moderately Concerned	Yes	1	0	1	1	0	0	0	1	0	0	0	0	1	1	0	1	1	0	1	0	0	0	65	Good	Enumerator 4
NC2025-1340	Valid Samples	2025-07-10	Nanchang West Railway Station	Male	≥60years	Bachelor's degree	Visitors from Other Provinces in China	High-Speed Rail / Train	Traveling with Friends	0	2–3 Days	Moderately Concerned	No	1	1	0	0	0	0	0	0	0	1	0	1	1	1	0	0	0	0	0	0	0	1	76	Very good	Enumerator 4
NC2025-1341	Valid Samples	2025-07-02	Nanchang Changbei International Airport	Male	25–34years	Bachelor's degree	Visitors from Other Provinces in China	Airplane	Traveling with Partner	2	2–3 Days	Very Concerned	Yes	0	1	0	1	0	1	0	0	0	0	1	1	1	0	0	0	0	0	0	0	0	0	86	Excellent	Enumerator 2
NC2025-1342	Valid Samples	2025-08-01	Nanchang Changbei International Airport	Female	18–24years	Master's degree or above	Visitors from Other Provinces in China	Airplane	Traveling Alone	2	4–7 Days	Very Concerned	Yes	1	0	0	0	0	1	0	0	0	1	0	0	1	0	0	0	0	1	0	0	0	0	58	Acceptable	Enumerator 4
NC2025-1343	Valid Samples	2025-08-08	Nanchang West Railway Station	Female	35–44years	Bachelor's degree	Visitors from Other Cities in Jiangxi Province	Local Public Transportation	Traveling with Friends	0	1 Day	Moderately Concerned	Yes	1	0	1	0	0	0	0	0	0	0	0	1	0	0	0	0	0	0	0	0	0	0	45	Marginal	Enumerator 2
NC2025-1344	Valid Samples	2025-07-10	Nanchang East Railway Station	Female	35–44years	Bachelor's degree	Visitors from Other Provinces in China	Private Car	Traveling Alone	0	4–7 Days	Moderately Concerned	No	1	0	0	1	0	0	0	0	0	1	1	1	0	0	0	0	0	0	0	0	0	1	68	Good	Enumerator 1
NC2025-1345	Valid Samples	2025-07-09	Nanchang Changbei International Airport	Female	35–44years	Bachelor's degree	Local Visitors from Nanchang	Airplane	Traveling with Family/Children	0	Less than Half a Day	Neutral	Yes	0	0	0	1	0	1	0	0	0	0	0	1	0	0	0	0	0	0	0	0	1	0	75	Very good	Enumerator 4
NC2025-1346	Valid Samples	2025-07-11	Nanchang Changbei International Airport	Female	18–24years	Associate degree	Visitors from Other Provinces in China	Airplane	Group Tour	0	1 Day	Moderately Concerned	Yes	1	1	1	1	0	0	0	0	1	0	0	1	0	0	1	0	0	0	0	0	0	0	70	Very good	Enumerator 1
NC2025-1347	Valid Samples	2025-08-04	Nanchang East Railway Station	Male	25–34years	Bachelor's degree	Visitors from Other Provinces in China	High-Speed Rail / Train	Traveling with Family/Children	1	1 Day	Moderately Concerned	No	1	1	0	1	1	1	0	0	0	0	1	1	0	1	1	1	0	0	0	0	0	1	75	Very good	Enumerator 2
NC2025-1348	Valid Samples	2025-08-23	Nanchang South Railway Station	Other / Prefer not to say	45–59years	Bachelor's degree	Visitors from Other Provinces in China	High-Speed Rail / Train	Traveling Alone	0	1 Day	Moderately Concerned	Yes	0	1	0	1	1	0	0	0	0	1	1	1	0	0	0	0	1	1	0	0	0	0	62	Good	Enumerator 4
NC2025-1349	Valid Samples	2025-08-17	Nanchang Railway Station	Male	25–34years	High school or below	Local Visitors from Nanchang	High-Speed Rail / Train	Traveling with Friends	0	2–3 Days	Neutral	Yes	1	0	0	0	0	0	0	0	0	0	0	1	0	0	0	0	1	1	0	0	0	0	68	Good	Enumerator 3
NC2025-1350	Valid Samples	2025-08-26	Nanchang East Railway Station	Female	25–34years	Associate degree	Visitors from Other Cities in Jiangxi Province	High-Speed Rail / Train	Traveling with Partner	0	Less than Half a Day	Moderately Concerned	No	1	1	0	0	0	0	0	0	0	1	0	0	0	1	0	0	0	0	0	0	0	1	87	Excellent	Enumerator 2
NC2025-1351	Valid Samples	2025-07-30	Nanchang East Railway Station	Male	35–44years	Associate degree	Visitors from Other Cities in Jiangxi Province	High-Speed Rail / Train	Traveling with Family/Children	0	2–3 Days	Neutral	No	0	1	0	1	0	0	0	0	0	1	0	1	0	1	0	0	0	0	0	0	0	1	73	Very good	Enumerator 3
NC2025-1352	Valid Samples	2025-08-13	Nanchang Railway Station	Male	35–44years	Master's degree or above	Visitors from Other Provinces in China	High-Speed Rail / Train	Traveling with Family/Children	0	4–7 Days	Neutral	Yes	1	0	0	0	0	1	0	0	0	1	0	1	0	0	0	0	0	1	0	0	0	0	60	Good	Enumerator 4
NC2025-1353	Valid Samples	2025-08-25	Nanchang West Railway Station	Male	45–59years	Bachelor's degree	Visitors from Other Provinces in China	High-Speed Rail / Train	Traveling with Friends	0	2–3 Days	Slightly Concerned	Yes	1	1	1	0	0	0	0	0	0	0	1	0	1	0	0	0	0	1	1	0	1	0	56	Acceptable	Enumerator 4
NC2025-1354	Valid Samples	2025-07-30	Nanchang West Railway Station	Male	18–24years	Associate degree	Local Visitors from Nanchang	High-Speed Rail / Train	Group Tour	0	2–3 Days	Neutral	No	1	1	0	0	0	1	0	0	0	1	0	0	0	0	1	0	0	0	0	0	0	1	87	Excellent	Enumerator 3
NC2025-1355	Valid Samples	2025-08-08	Nanchang Changbei International Airport	Male	≥60years	Bachelor's degree	Visitors from Other Provinces in China	Airplane	Traveling with Partner	4	2–3 Days	Neutral	No	1	0	0	1	0	0	0	0	0	1	1	0	0	0	0	0	0	0	0	0	0	1	68	Good	Enumerator 3
NC2025-1356	Valid Samples	2025-07-13	Nanchang Changbei International Airport	Male	25–34years	Bachelor's degree	Visitors from Other Provinces in China	Airplane	Traveling with Friends	0	Less than Half a Day	Neutral	Yes	0	1	0	0	0	1	0	0	0	1	1	0	1	0	0	1	0	1	0	0	0	0	72	Very good	Enumerator 2
NC2025-1357	Valid Samples	2025-08-12	Nanchang West Railway Station	Female	18–24years	High school or below	Visitors from Hong Kong, Macao, Taiwan, and Overseas	High-Speed Rail / Train	Traveling Alone	1	2–3 Days	Very Concerned	No	0	1	1	0	0	0	0	0	0	0	1	0	1	0	0	0	0	0	0	0	0	1	54	Acceptable	Enumerator 4
NC2025-1358	Valid Samples	2025-07-29	Nanchang South Railway Station	Female	25–34years	Associate degree	Visitors from Other Provinces in China	High-Speed Rail / Train	Traveling with Friends	0	4–7 Days	Moderately Concerned	Yes	1	1	0	1	0	0	0	0	0	1	0	1	0	0	0	0	0	0	0	0	0	0	52	Acceptable	Enumerator 4
NC2025-1359	Valid Samples	2025-07-30	Nanchang West Railway Station	Male	35–44years	Bachelor's degree	Visitors from Other Provinces in China	High-Speed Rail / Train	Traveling with Family/Children	2	2–3 Days	Neutral	No	1	1	1	1	0	0	0	0	0	0	1	0	0	1	0	0	0	0	0	0	0	1	70	Very good	Enumerator 3
NC2025-1360	Valid Samples	2025-07-27	Nanchang Changbei International Airport	Female	45–59years	Bachelor's degree	Visitors from Hong Kong, Macao, Taiwan, and Overseas	Airplane	Traveling Alone	0	1 Day	Moderately Concerned	Yes	1	1	1	0	0	1	0	0	0	1	1	0	1	1	0	1	0	1	1	0	0	0	55	Acceptable	Enumerator 2
NC2025-1361	Valid Samples	2025-07-02	Nanchang Changbei International Airport	Female	18–24years	Bachelor's degree	Visitors from Other Cities in Jiangxi Province	Airplane	Traveling with Friends	0	1 Day	Moderately Concerned	Yes	0	1	1	1	0	0	0	0	1	1	0	0	0	0	0	0	0	0	0	0	0	0	75	Very good	Enumerator 4
NC2025-1363	Valid Samples	2025-07-06	Nanchang South Railway Station	Male	25–34years	Associate degree	Visitors from Other Provinces in China	High-Speed Rail / Train	Group Tour	0	2–3 Days	Very Concerned	No	0	1	1	0	0	1	0	0	0	0	1	0	0	0	0	0	0	0	0	0	0	1	69	Good	Enumerator 2
NC2025-1364	Valid Samples	2025-07-26	Nanchang Changbei International Airport	Female	35–44years	High school or below	Local Visitors from Nanchang	Airplane	Group Tour	0	2–3 Days	Moderately Concerned	Yes	0	1	1	1	0	0	0	0	0	0	0	0	0	0	0	0	1	0	1	0	0	0	68	Good	Enumerator 2
NC2025-1365	Valid Samples	2025-07-10	Nanchang Railway Station	Female	25–34years	High school or below	Local Visitors from Nanchang	High-Speed Rail / Train	Group Tour	0	Less than Half a Day	Neutral	Yes	0	1	0	0	0	0	0	0	0	1	0	0	1	0	0	0	0	1	0	0	0	0	69	Good	Enumerator 3
NC2025-1366	Valid Samples	2025-07-09	Nanchang Railway Station	Male	25–34years	Bachelor's degree	Visitors from Other Provinces in China	High-Speed Rail / Train	Group Tour	0	2–3 Days	Neutral	Yes	0	0	1	1	0	0	1	0	0	0	1	0	0	1	0	0	0	1	0	1	0	0	79	Very good	Enumerator 1
NC2025-1367	Valid Samples	2025-07-26	Nanchang Changbei International Airport	Female	25–34years	Master's degree or above	Visitors from Other Provinces in China	Airplane	Traveling with Family/Children	4	4–7 Days	Moderately Concerned	Yes	1	0	1	1	1	0	0	0	0	1	0	0	0	0	0	0	0	0	0	0	1	0	67	Good	Enumerator 4
NC2025-1368	Valid Samples	2025-08-11	Nanchang Changbei International Airport	Male	35–44years	Master's degree or above	Visitors from Other Cities in Jiangxi Province	Airplane	Traveling with Friends	0	2–3 Days	Neutral	No	0	0	1	0	1	0	0	0	0	1	0	1	1	0	0	0	0	0	0	0	0	1	57	Acceptable	Enumerator 1
NC2025-1369	Valid Samples	2025-07-31	Nanchang West Railway Station	Male	18–24years	Bachelor's degree	Visitors from Other Cities in Jiangxi Province	High-Speed Rail / Train	Traveling with Friends	1	2–3 Days	Neutral	Yes	1	0	1	1	1	1	0	1	0	1	1	1	0	0	0	0	1	0	0	0	0	0	62	Good	Enumerator 4
NC2025-1370	Valid Samples	2025-08-26	Nanchang East Railway Station	Female	≥60years	High school or below	Visitors from Other Cities in Jiangxi Province	Private Car	Group Tour	0	Less than Half a Day	Neutral	Yes	0	0	1	0	0	0	0	0	1	1	0	0	1	0	0	0	0	0	0	1	0	0	55	Acceptable	Enumerator 4
NC2025-1371	Valid Samples	2025-08-10	Nanchang Railway Station	Male	25–34years	Bachelor's degree	Visitors from Other Provinces in China	Long-Distance Bus	Group Tour	0	4–7 Days	Very Concerned	No	1	1	1	0	0	1	0	0	0	0	1	0	0	1	0	0	0	0	0	0	0	1	71	Very good	Enumerator 4
NC2025-1373	Valid Samples	2025-08-14	Nanchang West Railway Station	Male	25–34years	Bachelor's degree	Visitors from Other Provinces in China	High-Speed Rail / Train	Traveling with Partner	1	2–3 Days	Slightly Concerned	No	1	0	1	1	1	1	0	0	0	1	0	0	1	1	0	0	0	0	0	0	0	1	74	Very good	Enumerator 2
NC2025-1374	Valid Samples	2025-08-26	Nanchang West Railway Station	Female	25–34years	Master's degree or above	Visitors from Other Cities in Jiangxi Province	Private Car	Traveling with Family/Children	0	1 Day	Moderately Concerned	Yes	1	1	0	1	0	0	0	0	0	0	0	1	0	0	1	0	0	1	0	0	0	0	66	Good	Enumerator 2
NC2025-1375	Valid Samples	2025-07-14	Nanchang Changbei International Airport	Female	25–34years	Bachelor's degree	Visitors from Other Provinces in China	Private Car	Traveling with Friends	3	1 Day	Neutral	No	1	1	1	0	0	0	0	0	0	1	0	1	0	0	0	1	0	0	0	0	0	1	98	Ideal	Enumerator 1
NC2025-1376	Valid Samples	2025-08-22	Nanchang Railway Station	Female	25–34years	Associate degree	Visitors from Other Provinces in China	High-Speed Rail / Train	Traveling with Partner	0	1 Day	Very Concerned	No	1	1	1	1	0	1	0	0	0	1	1	0	0	0	0	0	0	0	0	0	0	1	52	Acceptable	Enumerator 1
NC2025-1377	Valid Samples	2025-07-28	Nanchang South Railway Station	Female	18–24years	Bachelor's degree	Visitors from Other Cities in Jiangxi Province	High-Speed Rail / Train	Traveling with Family/Children	2	2–3 Days	Moderately Concerned	Yes	1	0	1	0	1	1	0	0	0	1	1	1	0	0	0	0	0	0	0	0	0	0	70	Very good	Enumerator 3
NC2025-1378	Valid Samples	2025-08-28	Nanchang East Railway Station	Female	25–34years	Master's degree or above	Visitors from Other Cities in Jiangxi Province	High-Speed Rail / Train	Traveling with Family/Children	2	More than 7 Days	Moderately Concerned	No	1	1	0	0	1	1	0	0	0	1	0	1	0	0	0	1	0	0	0	0	0	1	97	Ideal	Enumerator 2
NC2025-1379	Valid Samples	2025-08-10	Nanchang West Railway Station	Female	35–44years	Bachelor's degree	Visitors from Other Provinces in China	High-Speed Rail / Train	Group Tour	0	1 Day	Very Concerned	Yes	1	0	1	1	0	0	0	0	0	1	0	0	0	0	1	0	1	0	0	0	1	0	82	Excellent	Enumerator 4
NC2025-1381	Valid Samples	2025-08-23	Nanchang Railway Station	Male	35–44years	Bachelor's degree	Visitors from Other Cities in Jiangxi Province	Long-Distance Bus	Traveling with Family/Children	0	2–3 Days	Neutral	Yes	0	0	0	1	0	0	0	0	0	1	0	1	0	0	0	0	0	0	1	1	0	0	71	Very good	Enumerator 1
NC2025-1382	Valid Samples	2025-07-24	Nanchang East Railway Station	Male	18–24years	Associate degree	Visitors from Other Provinces in China	High-Speed Rail / Train	Traveling with Family/Children	0	1 Day	Moderately Concerned	Yes	1	1	1	1	0	1	0	0	0	0	0	0	0	1	0	0	0	0	0	0	0	0	55	Acceptable	Enumerator 4
NC2025-1383	Valid Samples	2025-08-05	Nanchang Railway Station	Female	≥60years	Bachelor's degree	Visitors from Other Provinces in China	Long-Distance Bus	Traveling with Partner	2	4–7 Days	Moderately Concerned	No	1	0	1	0	0	0	0	0	0	1	0	0	0	0	0	0	0	0	0	0	0	1	48	Marginal	Enumerator 4
NC2025-1384	Valid Samples	2025-08-02	Nanchang Changbei International Airport	Male	25–34years	Bachelor's degree	Visitors from Other Provinces in China	Airplane	Traveling with Partner	0	2–3 Days	Not Concerned at All	Yes	1	1	1	0	0	1	1	0	0	0	1	1	0	0	0	0	0	0	0	0	0	0	78	Very good	Enumerator 4
NC2025-1385	Valid Samples	2025-08-30	Nanchang East Railway Station	Female	25–34years	Bachelor's degree	Local Visitors from Nanchang	High-Speed Rail / Train	Traveling with Family/Children	0	More than 7 Days	Very Concerned	Yes	1	0	1	0	0	0	0	0	0	1	0	0	1	0	0	0	1	1	0	0	0	0	79	Very good	Enumerator 1
NC2025-1386	Valid Samples	2025-07-12	Nanchang West Railway Station	Female	18–24years	High school or below	Visitors from Other Provinces in China	High-Speed Rail / Train	Traveling with Friends	0	4–7 Days	Very Concerned	Yes	1	0	0	0	0	0	0	0	0	0	0	1	0	1	0	0	1	0	0	0	1	0	63	Good	Enumerator 4
NC2025-1387	Valid Samples	2025-07-12	Nanchang East Railway Station	Female	18–24years	High school or below	Visitors from Other Cities in Jiangxi Province	High-Speed Rail / Train	Traveling with Family/Children	0	2–3 Days	Neutral	Yes	1	0	0	0	0	1	0	0	0	0	1	1	1	0	0	0	1	0	1	0	0	0	69	Good	Enumerator 3
NC2025-1388	Valid Samples	2025-07-13	Nanchang Changbei International Airport	Female	25–34years	Master's degree or above	Local Visitors from Nanchang	Airplane	Traveling Alone	0	2–3 Days	Moderately Concerned	Yes	0	1	0	0	1	1	0	0	0	1	0	0	0	0	0	1	0	0	0	0	0	0	61	Good	Enumerator 1
NC2025-1390	Valid Samples	2025-08-26	Nanchang East Railway Station	Female	18–24years	Associate degree	Visitors from Other Cities in Jiangxi Province	High-Speed Rail / Train	Traveling with Family/Children	0	2–3 Days	Neutral	No	1	0	0	0	0	1	1	0	0	1	0	1	0	1	0	0	0	0	0	0	0	1	87	Excellent	Enumerator 4
NC2025-1391	Valid Samples	2025-07-16	Nanchang Railway Station	Female	35–44years	Bachelor's degree	Visitors from Other Provinces in China	Private Car	Traveling with Partner	0	2–3 Days	Very Concerned	Yes	1	0	1	0	1	1	0	0	0	0	1	1	0	0	0	0	0	0	0	0	0	0	59	Acceptable	Enumerator 4
NC2025-1392	Valid Samples	2025-08-05	Nanchang Changbei International Airport	Male	35–44years	Bachelor's degree	Visitors from Other Cities in Jiangxi Province	Airplane	Traveling with Partner	0	1 Day	Neutral	No	1	1	1	1	1	0	0	0	0	0	1	0	0	0	0	0	0	0	0	0	0	1	61	Good	Enumerator 3
NC2025-1393	Valid Samples	2025-08-10	Nanchang Railway Station	Female	25–34years	Bachelor's degree	Visitors from Other Cities in Jiangxi Province	High-Speed Rail / Train	Traveling with Family/Children	0	Less than Half a Day	Neutral	Yes	1	0	1	0	0	0	0	0	0	1	1	0	0	0	0	0	0	0	0	0	1	0	72	Very good	Enumerator 2
NC2025-1394	Valid Samples	2025-07-23	Nanchang East Railway Station	Female	18–24years	Bachelor's degree	Visitors from Other Provinces in China	High-Speed Rail / Train	Traveling Alone	1	Less than Half a Day	Neutral	Yes	1	0	0	1	1	1	0	1	0	0	0	1	0	1	1	0	1	0	1	0	0	0	66	Good	Enumerator 2
NC2025-1395	Valid Samples	2025-08-27	Nanchang West Railway Station	Female	25–34years	High school or below	Visitors from Other Provinces in China	High-Speed Rail / Train	Group Tour	0	1 Day	Moderately Concerned	Yes	0	1	0	0	0	0	1	0	0	0	1	0	0	0	0	1	0	0	0	0	0	0	57	Acceptable	Enumerator 4
[truncated: 7,465 more rows]

## Sheet: Invalid Sample Data
Sample_ID	ValidFlag	InvalidReason	Arrival Date	Survey Location	Gender	Age	Education Level	Place of Residence	Travel Mode	Travel Companion(s)	Number of Children	Length of Stay	Level of Attention to Weather Conditions	Adjusted Travel Plans Due to Weather	Travel Motivation – Historical and Cultural Sightseeing	Travel Motivation – Red Tourism Experience	Travel Motivation – Visiting Historic Districts	Travel Motivation – Visiting Museums or Memorial Halls	Travel Motivation – Visiting Historic Buildings and Archaeological Sites	Travel Motivation – Urban Leisure and Recreation	Travel Motivation – Family Trip or Accompanying Relatives/Friends	Travel Motivation – Business or Conference Trip	Travel Motivation – Other	Visited Heritage Site –Historic Architecture	Visited Heritage Site – Revolutionary Cultural Heritage	Visited Heritage Site – Historic and Cultural Districts	Visited Heritage Site – Museums / Memorial Halls	Visited Heritage Site –Archaeological Site Heritage	Visited Heritage Site – Religious Cultural Spaces	Visited Heritage Site – Intangible Cultural Heritage Experience	Weather Adaptation – Changed Visiting Time	Weather Adaptation – Reduced Outdoor Stay	Weather Adaptation – Increased Indoor Visits	Weather Adaptation – Switched to Nighttime Visits	Weather Adaptation – Cancelled Part of the Itinerary	Adjusted Travel Plans Due to Weather	Perceived Climate Comfort (PCC) Score	PCC level	Enumerator
[truncated: 973 more rows]

[truncated: 1 more sheets: Data Description]
