# Supplementary material
Source: Research Square preprint supplement (doi:10.21203/rs.3.rs-9858585/v1)
Supplement: Supplementary file 2 [file d45328bcd080c55892f0529b.pdf]

## Ethical Approval

Project Title

Reassessing Climate Comfort in Cultural Heritage Tourism under High-Temperature Conditions:  
Can Climate Indices Reflect Tourists' Actual Perceptions?

Principal Investigator

Shiwen Lai  
Jiangxi University of Finance and Economics

Project Description

### 1. Research Protocol

This study aims to reassess climate comfort in cultural heritage tourism under high-temperature conditions and examine whether objective climate indices (HCI:Urban and HERCI) accurately reflect tourists' actual climate perceptions.

The study employed an anonymous questionnaire survey. Participants were adult tourists aged 18 years and above. Survey locations included major cultural heritage attractions and transportation hubs in Nanchang, Jiangxi Province, China, including Tengwang Pavilion, Wanshougong Historic and Cultural Block, August 1st Nanchang Uprising Memorial Hall, Shengjin Pagoda, Youmin Temple, Haihunhou National Archaeological Site Park, Nanchang West Railway Station, Nanchang Railway Station, Nanchang East Railway Station, Nanchang South Railway Station, and Nanchang Changbei International Airport.

Data collection was conducted between 30 June 2025 and 30 August 2025.

The survey was administered electronically. No personally identifiable information, including names, identification numbers, telephone numbers, or contact information, was collected. All data were used solely for academic research purposes.

### 2. Informed Consent

Participation in this study was entirely voluntary.

Prior to completing the questionnaire, participants were informed of:

1. The purpose and content of the study;
2. The voluntary nature of participation;
3. Their right to withdraw from the survey at any time;
4. The academic use of the collected data;
5. The fact that no sensitive personal information would be collected; and
6. The confidentiality and anonymity of all responses.

Participants who proceeded to complete and submit the questionnaire were deemed to have provided informed consent to participate in the study.

#### Research Ethics Committee Statement

Upon review, this study was determined to constitute minimal-risk social science research.

The research design was scientifically sound and complied with accepted academic research standards. The study did not involve medical interventions, biological sample collection, or the collection of sensitive personal information and posed no foreseeable physical, psychological, social, or legal risks to participants.

The study adhered to the principles of informed consent, voluntary participation, privacy protection, and data confidentiality. The rights and welfare of participants were adequately protected, and no ethical concerns or conflicts of interest were identified.

#### Conclusion

The Research Office concludes that this study satisfies the ethical requirements for minimal-risk social science research and approves the implementation of the research protocol and subsequent data analysis.

Approved by:

Research Office

Jiangxi University of Finance and Economics

Date: 02 June 2025
